# Supplementary material
Source: HighWire-hosted journal article supplement (doi:10.1101/rna.079755.123)
Supplement: Supplemental_Legends.docx [file Supplemental_Legends.docx]

**Supplemental Legends:**

**Figure S1. Ribosome bound nascent Rpt1 is present in non-ubiquitinated and monoubiqutinated forms.**

Nascent Rpt1 was immunoprecipitated via the N-terminal Flag tag expressed by the Rpt1-RNC construct transformed to wild type yeast cells. Proteins of input and immunoprecipitated samples were separated by 10% denaturing SDS-PAGE and was subjected to Western-blotting following the Flag tag on Rpt1 N-term and ubiquitin with specific antibodies. Egd2 was revealed as a negative control for the IP with specific antibodies. Results of no antibody control (NAC) IPs are also shown.

**Figure S2.** **Sgs1, Rad10 and Rad14 are strong candidates for being regulated by assemblysomes**. The N-terminal of the proteins are disordered (blue) and there are pairs of rare codons (encoding amino acids shown with yellow) capable of pausing translation in positions allowing the protrusion of the disordered N-term from the ribosome. Each protein has several lysine amino acids that can be target of ubiquitination in the N-terminal disordered region.

**Figure S3. Sequencing pellet and EDTA-pellet mRNA libraries reveals good reproducibility.**

Read counts expressed in log2 scale correlates well within the two biological duplicates in pellets (**A**) and in EDTA-pellets (**B**) also.

**Figure S4. Distribution of disordered amino acids in N-terminus of EDTA sensitive and resistant pellet enriched proteins.** Distribution of N-terminal disordered amino acids (AA) encoded by the bottom (**A**) and the top (**B**) 3,000 mRNAs of a list ranked by decreasing pellet/EDTA-pellet sequencing read ratio.

**Figure S5. 1,6-hexanediol dissolves EDTA resistant ribosome assemblies.**

Same experiment as shown on Fig. 2 in the presence or in the absence of 1,6-hexanediol (HEX) in the case samples originating from UV treated cells. Change in *ACT1*, *SGS1, RAD10* and *RAD14* mRNA quantities in EDTA-pellets and total extracts (TE) after indicated treatments as compared to untreated control.

Values in the chart represent average of two independent measurements of biological replicates with error bars representing standard deviation. Statistical significance is determined by Student’s t-test (*p < 0.05, **p <0.01).

**Table S1: Strains, plasmids, oligonucleotides used in this study.**

**Table S2. Yeast protein complex subunits ranked according to their N-terminal disorder probability.** Protein complex subunit IDs are from Swiss-Prot. Ranking was performed after assessment of N-terminal disorder probability exploiting various prediction algorithms. Among these algorithms *vsl2b, iupredLD and espritzXray* was used to generate the final ranking by following the disorder probability on the first 50 and 10 aminoacids (aa’s) respectively. Numbers represent disordered aa’s among the first 10, 25 or 50 aa’s except for the last row where the ubiquitylation prone lysin content of the nascent N-terms are highlighted.

**Table S3. N-terminal disorder propensities of human proteins.** Table is showing human proteins ranked according to their disorder propensity of their first 50 amino acids. Disorder values represent the number of disordered amino acids from the first 50 as determined by using the AlphaFold database (Jumper et al. 2021 ). A protein is considered to be N-terminally disordered if the disorder value is greater than 25. BLM (Uniprot ID: P54132) and PSMC1 (Uniprot ID: P62191) proteins are highlighted with yellow.

**Table S4. Gene Ontology (GO) categories that are enriched among the disordered N-term proteins in yeast and human against all proteins in the two Uniprot databases.** For yeast we used de vsl2b algorithm and considered those proteins to be N-terminally disordered where vsl2b found more than 25 disordered amino acids among the first 50. In the case of human proteins, a protein was considered to be N-terminally disordered if the disorder value was greater than 25 according to the AlphaFold database (Jumper et al. 2021). GOs found in human and yeast databases are highlighted on separate sheets, but 258 identical GO categories are listed above a black line on the excel sheet “Identical”. Below the black line GO categories unique to yeast or human are listed.

Functional classification of GO categories are highlighted with colour codes as follows: Green: Translation, Orange: DNA damage response, Yellow: Cytoskeleton, Light Blue: Transport, Middle Blue: Transcription, Dark Blue: Stress Response, Light Grey: Decay, Grey: Assembly Processes, Red: Mitochondria, Pink: Spliceing, Violet: Autophagy. These categories are shown with colour code on the sheet that summarizes identical GOs (on sheet “Common”).

**Table S5. Pellet and EDTA-pellet mRNA sequencing raw read counts.** Read counts for each mRNAs are shown as revealed by NGS sequencing in pellet and EDTA-pellet libraries performed in biological duplicates.

**Table S6. Pellet/EDTA-pellet read ratios.** Ratios are expressed in log2 scale for each mRNA.

**Table S7. All GO terms discovered among Pellet and EDTA-pellet associated mRNAs.** Pellet associated mRNAs are the top 3,000 mRNAs in a pellet/EDTA-pellet read count ranking. EDTA-pellet associated ones are the bottom 3,000 mRNAs of this list. Underrepresented stress response related GOs are also shown in the case of the pellet. Functional classification of GO categories are highlighted with colour codes as follows: Green: Translation, Orange: DNA damage response, Yellow: Cytoskeleton, Light Blue: Transport, Middle Blue: Transcription, Dark Blue: Stress Response, Light Grey: Decay, Grey: Assembly Processes, Red: Mitochondria, Pink: Spliceing, Violet: Autophagy. These categories are shown with colour code on the sheet that summarizes identical GOs between sequenced and predicted data.
