# Supplementary material
Source: HighWire-hosted journal article supplement (doi:10.1101/rna.079755.123)
Supplement: Supplemental_Table_S3.xlsx [file Supplemental_Table_S3.xlsx]

## Sheet: Sheet 1
UniProt ID	disorder	total_len	Lys	Ensembl gene ID
Q70CQ2	50	50	3	ENSG00000115464
Q5THJ4	50	50	5	ENSG00000048707
Q7Z6Z7	50	50	8	ENSG00000086758
Q15751	50	50	4	ENSG00000103657
Q15751	50	50	4	ENSG00000103657
Q15751	50	50	4	ENSG00000103657
P78527	50	50	0	ENSG00000253729
Q8NEZ4	50	50	3	ENSG00000055609
Q8NEZ4	50	50	3	ENSG00000055609
Q8NEZ4	50	50	3	ENSG00000055609
Q8NEZ4	50	50	3	ENSG00000055609
Q2LD37	50	50	1	ENSG00000138688
Q2LD37	50	50	1	ENSG00000138688
Q2LD37	50	50	1	ENSG00000138688
Q2LD37	50	50	1	ENSG00000138688
Q2LD37	50	50	1	ENSG00000138688
Q09666	50	50	2	ENSG00000124942
Q09666	50	50	2	ENSG00000124942
Q09666	50	50	2	ENSG00000124942
Q09666	50	50	2	ENSG00000124942
Q09666	50	50	2	ENSG00000124942
Q09666	50	50	2	ENSG00000124942
Q09666	50	50	2	ENSG00000124942
Q09666	50	50	2	ENSG00000124942
Q09666	50	50	2	ENSG00000124942
Q09666	50	50	2	ENSG00000124942
Q09666	50	50	2	ENSG00000124942
Q09666	50	50	2	ENSG00000124942
Q09666	50	50	2	ENSG00000124942
Q09666	50	50	2	ENSG00000124942
Q09666	50	50	2	ENSG00000124942
Q09666	50	50	2	ENSG00000124942
Q09666	50	50	2	ENSG00000124942
Q9UPN3	50	50	0	ENSG00000127603
Q9UPN3	50	50	0	ENSG00000127603
Q9UPN3	50	50	0	ENSG00000127603
Q9UPN3	50	50	0	ENSG00000127603
Q9UPN3	50	50	0	ENSG00000127603
O14686	50	50	2	ENSG00000167548
O14686	50	50	2	ENSG00000167548
O14686	50	50	2	ENSG00000167548
Q63HN8	50	50	2	ENSG00000173821
Q03001	50	50	6	ENSG00000151914
Q03001	50	50	6	ENSG00000151914
Q03001	50	50	6	ENSG00000151914
Q03001	50	50	6	ENSG00000151914
Q03001	50	50	6	ENSG00000151914
Q03001	50	50	6	ENSG00000151914
Q15911	50	50	2	ENSG00000140836
Q15911	50	50	2	ENSG00000140836
Q9P2D7	50	50	2	ENSG00000114841
Q8IVF2	50	50	0	ENSG00000185567
Q8IVF2	50	50	0	ENSG00000185567
Q8IVF2	50	50	0	ENSG00000185567
Q8IVF2	50	50	0	ENSG00000185567
Q8IVF2	50	50	0	ENSG00000185567
Q8IVF2	50	50	0	ENSG00000185567
Q8IVF2	50	50	0	ENSG00000185567
Q8IVF2	50	50	0	ENSG00000185567
Q8IVF2	50	50	0	ENSG00000185567
Q8IVF2	50	50	0	ENSG00000185567
Q8IVF2	50	50	0	ENSG00000185567
Q8IVF2	50	50	0	ENSG00000185567
Q8IVF2	50	50	0	ENSG00000185567
Q8IVF2	50	50	0	ENSG00000185567
Q8IVF2	50	50	0	ENSG00000185567
Q8IVF2	50	50	0	ENSG00000185567
Q8IVF2	50	50	0	ENSG00000185567
Q8IVF2	50	50	0	ENSG00000185567
Q8IVF2	50	50	0	ENSG00000185567
Q9HC84	50	50	0	ENSG00000117983
Q9HC84	50	50	0	ENSG00000117983
Q9HC84	50	50	0	ENSG00000117983
Q9HC84	50	50	0	ENSG00000117983
Q9HC84	50	50	0	ENSG00000117983
Q9HC84	50	50	0	ENSG00000117983
Q9HC84	50	50	0	ENSG00000117983
Q9HC84	50	50	0	ENSG00000117983
Q9HC84	50	50	0	ENSG00000117983
Q9HC84	50	50	0	ENSG00000117983
Q9NR99	50	50	1	ENSG00000101825
Q9NR99	50	50	1	ENSG00000101825
Q9NR99	50	50	1	ENSG00000101825
Q9NR99	50	50	1	ENSG00000101825
Q9NR99	50	50	1	ENSG00000101825
Q5VT06	50	50	5	ENSG00000135837
Q96L91	50	50	0	ENSG00000183495
Q96L91	50	50	0	ENSG00000183495
Q96L91	50	50	0	ENSG00000183495
Q9HCE0	50	50	9	ENSG00000152223
Q9NR48	50	50	5	ENSG00000116539
Q9NR48	50	50	5	ENSG00000116539
Q9NR48	50	50	5	ENSG00000116539
Q9NR48	50	50	5	ENSG00000116539
Q9NR48	50	50	5	ENSG00000116539
Q9NR48	50	50	5	ENSG00000116539
Q96Q15	50	50	2	ENSG00000157106
Q9NR09	50	50	1	ENSG00000115760
Q14789	50	50	0	ENSG00000173230
O75592	50	50	0	ENSG00000005810
O75592	50	50	0	ENSG00000005810
O75592	50	50	0	ENSG00000005810
P46013	50	50	3	ENSG00000148773
P46013	50	50	3	ENSG00000148773
P46013	50	50	3	ENSG00000148773
Q96T58	50	50	4	ENSG00000065526
Q9UQ35	50	50	2	ENSG00000167978
Q9UQ35	50	50	2	ENSG00000167978
O14647	50	50	2	ENSG00000173575
Q12802	50	50	3	ENSG00000170776
Q12802	50	50	3	ENSG00000170776
Q12802	50	50	3	ENSG00000170776
Q8WZ42	50	50	0	ENSG00000155657
Q8WZ42	50	50	0	ENSG00000155657
Q8WZ42	50	50	0	ENSG00000155657
Q8WZ42	50	50	0	ENSG00000155657
Q8WZ42	50	50	0	ENSG00000155657
Q8WZ42	50	50	0	ENSG00000155657
Q8WZ42	50	50	0	ENSG00000155657
Q8WZ42	50	50	0	ENSG00000155657
Q8WZ42	50	50	0	ENSG00000155657
Q8WZ42	50	50	0	ENSG00000155657
Q8WZ42	50	50	0	ENSG00000155657
Q8WZ42	50	50	0	ENSG00000155657
Q5SZK8	50	50	0	ENSG00000150893
Q5THK1	50	50	1	ENSG00000183530
Q9H4A3	50	50	3	ENSG00000060237
Q99996	50	50	12	ENSG00000127914
Q92793	50	50	2	ENSG00000005339
P31629	50	50	3	ENSG00000010818
P42858	50	50	3	ENSG00000197386
P15924	50	50	0	ENSG00000096696
Q07869	50	50	0	ENSG00000186951
Q5HYC2	50	50	0	ENSG00000183354
Q09472	50	50	2	ENSG00000100393
Q9P2D1	50	50	0	ENSG00000171316
O15027	50	50	0	ENSG00000148396
Q9HCU4	50	50	0	ENSG00000143126
O43151	50	50	0	ENSG00000187605
Q8N3K9	50	50	0	ENSG00000164309
Q8N3K9	50	50	0	ENSG00000164309
Q8N3K9	50	50	0	ENSG00000164309
Q8N3K9	50	50	0	ENSG00000164309
Q8N3K9	50	50	0	ENSG00000164309
Q8N3K9	50	50	0	ENSG00000164309
Q8N3K9	50	50	0	ENSG00000164309
Q9NYQ7	50	50	0	ENSG00000008300
Q9NYQ7	50	50	0	ENSG00000008300
O00763	50	50	5	ENSG00000076555
Q9HCD6	50	50	3	ENSG00000170921
O95071	50	50	3	ENSG00000104517
Q5T011	50	50	2	ENSG00000198198
Q6KC79	50	50	1	ENSG00000164190
Q6KC79	50	50	1	ENSG00000164190
Q6KC79	50	50	1	ENSG00000164190
Q99973	50	50	3	ENSG00000129566
Q8IVL1	50	50	6	ENSG00000166833
Q12830	50	50	1	ENSG00000171634
Q12830	50	50	1	ENSG00000171634
Q12830	50	50	1	ENSG00000171634
Q93008	50	50	0	ENSG00000124486
O15021	50	50	1	ENSG00000069020
Q9H2X6	50	50	4	ENSG00000064393
P10071	50	50	5	ENSG00000106571
Q9P225	50	50	3	ENSG00000183914
P49750	50	50	0	ENSG00000119596
Q13085	50	50	2	ENSG00000275176;ENSG00000278540
P35670	50	50	4	ENSG00000123191
O75962	50	50	1	ENSG00000038382
O75962	50	50	1	ENSG00000038382
Q9UIF8	50	50	1	ENSG00000123636
P15822	50	50	9	ENSG00000095951
P15822	50	50	9	ENSG00000095951
P50851	50	50	2	ENSG00000198589
P50851	50	50	2	ENSG00000198589
P50851	50	50	2	ENSG00000198589
Q8NG31	50	50	1	ENSG00000137812
Q9Y4G8	50	50	3	ENSG00000109756
Q9UMN6	50	50	0	ENSG00000272333
Q14690	50	50	7	ENSG00000148843
Q8NFC6	50	50	0	ENSG00000038219
O14497	50	50	3	ENSG00000117713
Q86Z02	50	50	5	ENSG00000163349
Q9HCK8	50	50	0	ENSG00000100888
Q8WYL5	50	50	2	ENSG00000084112
Q8TCU4	50	50	0	ENSG00000116127
Q8TCU4	50	50	0	ENSG00000116127
Q8TCU4	50	50	0	ENSG00000116127
Q8TCU4	50	50	0	ENSG00000116127
Q8TCU4	50	50	0	ENSG00000116127
Q8TCU4	50	50	0	ENSG00000116127
Q8TCU4	50	50	0	ENSG00000116127
Q92673	50	50	0	ENSG00000137642
Q12873	50	50	6	ENSG00000170004
P25054	50	50	5	ENSG00000134982
P25054	50	50	5	ENSG00000134982
Q9UIF9	50	50	2	ENSG00000076108
Q8IUD2	50	50	1	ENSG00000082805
Q6W2J9	50	50	2	ENSG00000183337
Q9Y520	50	50	9	ENSG00000117523
O15054	50	50	0	ENSG00000132510
Q5VST9	50	50	3	ENSG00000154358
Q5VST9	50	50	3	ENSG00000154358
A7KAX9	50	50	3	ENSG00000134909
Q3L8U1	50	50	0	ENSG00000177200
Q3L8U1	50	50	0	ENSG00000177200
Q3L8U1	50	50	0	ENSG00000177200
Q13905	50	50	10	ENSG00000107263
O60318	50	50	2	ENSG00000160294
Q86US8	50	50	3	ENSG00000070366
Q08378	50	50	2	ENSG00000090615
A3KMH1	50	50	0	ENSG00000102763
Q96IP4	50	50	0	ENSG00000112773
Q15058	50	50	2	ENSG00000118193
O75376	50	50	0	ENSG00000141027
Q96RL7	50	50	3	ENSG00000197969
Q8IZD2	50	50	1	ENSG00000005483
Q86V15	50	50	6	ENSG00000130940
Q5T5P2	50	50	3	ENSG00000120549
O94916	50	50	2	ENSG00000102908
Q7Z3K3	50	50	2	ENSG00000143442
Q14669	50	50	0	ENSG00000153827
P49792	50	50	7	ENSG00000153201
Q9Y4B4	50	50	0	ENSG00000164080
Q14766	50	50	0	ENSG00000049323
O15417	50	50	1	ENSG00000182095
O15417	50	50	1	ENSG00000182095
Q8TD26	50	50	8	ENSG00000124177
Q9P2E3	50	50	0	ENSG00000124201
Q3T8J9	50	50	5	ENSG00000116580
Q9NZN5	50	50	5	ENSG00000196914
P98160	50	50	0	ENSG00000142798
O60503	50	50	4	ENSG00000162104
Q8TEP8	50	50	0	ENSG00000101639
Q9BY89	50	50	2	ENSG00000197077
Q9NYV4	50	50	7	ENSG00000167258
Q9H799	50	50	8	ENSG00000197603
Q9Y2D9	50	50	1	ENSG00000198740
Q8WXE9	50	50	0	ENSG00000140022
Q01668	50	50	3	ENSG00000157388
Q6DN90	50	50	0	ENSG00000144711
Q9HCJ0	50	50	2	ENSG00000078687
Q9UGU0	50	50	0	ENSG00000100207;ENSG00000262024;ENSG00000276461;ENSG00000280467;ENSG00000281897;ENSG00000282892;ENSG00000283026;ENSG00000283681
Q14671	50	50	3	ENSG00000134644
Q9ULI0	50	50	3	ENSG00000119778
Q76I76	50	50	1	ENSG00000141298
Q96M96	50	50	6	ENSG00000139132
Q9P203	50	50	1	ENSG00000011114;ENSG00000277222
Q9UGH3	50	50	4	ENSG00000089057
Q9Y2I7	50	50	3	ENSG00000115020
O95359	50	50	2	ENSG00000138162
O95359	50	50	2	ENSG00000138162
O95359	50	50	2	ENSG00000138162
O95359	50	50	2	ENSG00000138162
O95359	50	50	2	ENSG00000138162
O75417	50	50	2	ENSG00000051341
Q9P2F8	50	50	6	ENSG00000116991
Q14767	50	50	1	ENSG00000119681
O75882	50	50	0	ENSG00000088812
O95425	50	50	2	ENSG00000197321
P51795	50	50	0	ENSG00000171365
Q14202	50	50	1	ENSG00000147130
Q7Z7A1	50	50	5	ENSG00000119397
Q8TF20	50	50	6	ENSG00000182903
P51587	50	50	3	ENSG00000139618
P51587	50	50	3	ENSG00000139618
P51587	50	50	3	ENSG00000139618
P51587	50	50	3	ENSG00000139618
P51587	50	50	3	ENSG00000139618
Q9Y618	50	50	0	ENSG00000196498
Q96PE2	50	50	1	ENSG00000110237
Q8NFD5	50	50	0	ENSG00000049618
Q9H9J4	50	50	1	ENSG00000106346
P50443	50	50	2	ENSG00000155850
Q12888	50	50	0	ENSG00000067369
P06401	50	50	2	ENSG00000082175
A6NFI3	50	50	1	ENSG00000205903
Q9H6R4	50	50	5	ENSG00000165271
Q9NYQ6	50	50	0	ENSG00000075275
Q99700	50	50	0	ENSG00000204842
Q9C0G0	50	50	5	ENSG00000215421
Q9C0D5	50	50	6	ENSG00000115183
Q6P1L6	50	50	6	ENSG00000088876
Q17R98	50	50	2	ENSG00000151612
O95271	50	50	0	ENSG00000173273
Q9HC77	50	50	2	ENSG00000151849
Q86UU0	50	50	4	ENSG00000186174
O00418	50	50	0	ENSG00000103319
Q6ZMP0	50	50	1	ENSG00000187720
Q9Y4F3	50	50	3	ENSG00000166783;ENSG00000277140
O43432	50	50	0	ENSG00000075151
P53804	50	50	0	ENSG00000182670
Q96SN8	50	50	0	ENSG00000136861
Q96T37	50	50	2	ENSG00000162775
Q9UHW9	50	50	2	ENSG00000140199
Q9UJ98	50	50	1	ENSG00000066923
P0CK96	50	50	5	ENSG00000189339
Q6N021	50	50	1	ENSG00000168769
Q8TDR2	50	50	2	ENSG00000125834
O94925	50	50	0	ENSG00000115419
Q6PL18	50	50	2	ENSG00000156802
Q9UHN6	50	50	3	ENSG00000135048
Q8IZT6	50	50	0	ENSG00000066279
Q8IZT6	50	50	0	ENSG00000066279
O75976	50	50	2	ENSG00000108582
O43306	50	50	3	ENSG00000174233
Q92896	50	50	1	ENSG00000090863
Q6AHZ1	50	50	9	ENSG00000177853
Q92900	50	50	0	ENSG00000005007
Q70CQ4	50	50	4	ENSG00000103404
Q9HCM3	50	50	1	ENSG00000122778
Q9Y6N7	50	50	2	ENSG00000169855
Q8N653	50	50	1	ENSG00000099949
Q96RG2	50	50	0	ENSG00000115687
Q9Y3P9	50	50	4	ENSG00000011454
Q92569	50	50	2	ENSG00000117461
P08047	50	50	2	ENSG00000185591
O60293	50	50	1	ENSG00000133858
O43166	50	50	2	ENSG00000197555
O75362	50	50	2	ENSG00000171940
Q14004	50	50	3	ENSG00000065883
A3KN83	50	50	0	ENSG00000139697
Q13009	50	50	4	ENSG00000156299
Q504Q3	50	50	0	ENSG00000135473
O15055	50	50	1	ENSG00000132326
Q9Y4B5	50	50	2	ENSG00000168502
Q9NRR4	50	50	0	ENSG00000113360
Q9H422	50	50	3	ENSG00000110422
Q8IY37	50	50	5	ENSG00000150990
Q9C0H6	50	50	3	ENSG00000102271
O95390	50	50	0	ENSG00000135414
O43379	50	50	1	ENSG00000075702
Q9UBV2	50	50	2	ENSG00000071537
O94812	50	50	1	ENSG00000007516
Q9ULQ1	50	50	1	ENSG00000186815
Q9H2X9	50	50	2	ENSG00000124140
P26196	50	50	2	ENSG00000110367
P52948	50	50	1	ENSG00000110713
O15530	50	50	0	ENSG00000140992
Q2QGD7	50	50	0	ENSG00000070476
P23470	50	50	1	ENSG00000144724
P22059	50	50	0	ENSG00000110048
Q7Z5J4	50	50	2	ENSG00000108557
O60307	50	50	2	ENSG00000099308
O60290	50	50	3	ENSG00000106479
Q9P2P5	50	50	0	ENSG00000138411
P49116	50	50	2	ENSG00000177463
O95486	50	50	0	ENSG00000113615
P49756	50	50	0	ENSG00000119707
Q9H2H9	50	50	2	ENSG00000111371
P12757	50	50	8	ENSG00000136603
P10828	50	50	5	ENSG00000151090
P78352	50	50	2	ENSG00000132535
O96028	50	50	6	ENSG00000109685
Q9ULU4	50	50	8	ENSG00000101040
Q8NFM7	50	50	0	ENSG00000144730
A8MWY0	50	50	0	ENSG00000164659
Q93009	50	50	1	ENSG00000187555
Q8NA23	50	50	6	ENSG00000148225
Q15154	50	50	6	ENSG00000078674
Q12913	50	50	1	ENSG00000149177
O14646	50	50	0	ENSG00000153922
P53992	50	50	0	ENSG00000176986
O60907	50	50	1	ENSG00000101849
Q5SVQ8	50	50	5	ENSG00000177888
Q96RK0	50	50	0	ENSG00000079432
O15270	50	50	0	ENSG00000100596
Q9BZ95	50	50	0	ENSG00000147548
Q96P64	50	50	0	ENSG00000188234
Q99558	50	50	8	ENSG00000006062
Q9P0V3	50	50	2	ENSG00000130147
Q96KR4	50	50	1	ENSG00000185621
Q8N201	50	50	5	ENSG00000164880
Q12955	50	50	9	ENSG00000151150
Q8WUQ7	50	50	0	ENSG00000105298
Q9H4Z2	50	50	0	ENSG00000198026
Q6P158	50	50	5	ENSG00000163214
Q6ZNG1	50	50	2	ENSG00000189190
Q9UPN9	50	50	1	ENSG00000197323
Q5XG87	50	50	0	ENSG00000112941
O60292	50	50	0	ENSG00000105738
O94966	50	50	6	ENSG00000172046
P48380	50	50	0	ENSG00000080298
Q96M83	50	50	9	ENSG00000216937
Q14966	50	50	0	ENSG00000075292
Q9UBW7	50	50	1	ENSG00000121741
Q15349	50	50	6	ENSG00000071242
Q8TB72	50	50	4	ENSG00000055917
O94822	50	50	4	ENSG00000198862
O14639	50	50	5	ENSG00000099204
Q9UEG4	50	50	0	ENSG00000102870
Q5T5X7	50	50	3	ENSG00000178409
P03372	50	50	3	ENSG00000091831
Q06889	50	50	2	ENSG00000179388
Q9Y5Y0	50	50	3	ENSG00000162769
Q6UB99	50	50	10	ENSG00000167522
P30291	50	50	1	ENSG00000166483
P35555	50	50	2	ENSG00000166147
Q96Q89	50	50	1	ENSG00000138182
Q9NTJ3	50	50	1	ENSG00000113810
Q9Y4X5	50	50	0	ENSG00000166233
Q5VYS8	50	50	6	ENSG00000083223
Q5SXM1	50	50	3	ENSG00000181450
O60502	50	50	1	ENSG00000198408
O75132	50	50	7	ENSG00000100426
Q14126	50	50	3	ENSG00000046604
P51790	50	50	0	ENSG00000109572
O43520	50	50	0	ENSG00000081923
Q13608	50	50	0	ENSG00000124587
Q86Y13	50	50	4	ENSG00000198919
O43593	50	50	2	ENSG00000168453
Q96PN7	50	50	1	ENSG00000124496
Q96NJ6	50	50	4	ENSG00000180787
Q9H8M5	50	50	3	ENSG00000148842
Q08174	50	50	0	ENSG00000156453
Q8WYQ5	50	50	0	ENSG00000128191
Q14679	50	50	4	ENSG00000135912
P51784	50	50	0	ENSG00000102226
Q86XP3	50	50	6	ENSG00000198231
Q12774	50	50	1	ENSG00000050327
Q8NEL9	50	50	0	ENSG00000100523
Q7Z3E2	50	50	6	ENSG00000165813
Q8N961	50	50	2	ENSG00000166016
Q9C0C9	50	50	0	ENSG00000175931
A8MXQ7	50	50	7	ENSG00000203499
P42892	50	50	1	ENSG00000117298
O75122	50	50	4	ENSG00000163539
Q13523	50	50	7	ENSG00000112739
Q9UJA3	50	50	4	ENSG00000125885
Q9HAU5	50	50	11	ENSG00000151461
Q9UII5	50	50	6	ENSG00000196247
O15440	50	50	3	ENSG00000114770
Q96QD8	50	50	4	ENSG00000134294
Q6ZNA4	50	50	5	ENSG00000157450
Q96ST3	50	50	1	ENSG00000169375
O95758	50	50	4	ENSG00000119314
Q8N3P4	50	50	5	ENSG00000156931
Q9Y666	50	50	0	ENSG00000113504
Q99683	50	50	0	ENSG00000197442
Q12766	50	50	9	ENSG00000113716
O00716	50	50	2	ENSG00000112242
Q5TZA2	50	50	1	ENSG00000058453
Q92630	50	50	1	ENSG00000127334
Q6PJF5	50	50	3	ENSG00000129667
P29122	50	50	0	ENSG00000140479
A8K8P3	50	50	12	ENSG00000198089
Q7L014	50	50	3	ENSG00000145833
A4D1U4	50	50	0	ENSG00000257093;ENSG00000262599
Q9UBC3	50	50	1	ENSG00000088305
Q6IC98	50	50	3	ENSG00000075240
Q8NHU3	50	50	5	ENSG00000164023
O43861	50	50	1	ENSG00000166377
P42704	50	50	0	ENSG00000138095
O15091	50	50	3	ENSG00000100890
Q9P2J8	50	50	2	ENSG00000197566
P20936	50	50	1	ENSG00000145715
Q8WYA1	50	50	2	ENSG00000029153
Q9H7D7	50	50	0	ENSG00000162923
Q96CT2	50	50	0	ENSG00000119771
Q9NQL2	50	50	1	ENSG00000025039
Q9P260	50	50	0	ENSG00000134444
Q9Y2G9	50	50	0	ENSG00000064932;ENSG00000278788
Q5XUX0	50	50	0	ENSG00000103264
Q9BTC0	50	50	6	ENSG00000101191
A6QL63	50	50	2	ENSG00000151136
Q5VZL5	50	50	2	ENSG00000146463
Q9NQV6	50	50	1	ENSG00000170325
Q12979	50	50	1	ENSG00000159842;ENSG00000276016;ENSG00000278741
Q8NDZ2	50	50	2	ENSG00000170085
Q6ZS17	50	50	0	ENSG00000039523
Q8NBP0	50	50	0	ENSG00000143643
A1A5C7	50	50	0	ENSG00000137266
O60266	50	50	0	ENSG00000138031
Q86UW7	50	50	0	ENSG00000081803
Q6UXD5	50	50	1	ENSG00000174938
P04150	50	50	3	ENSG00000113580
Q5VWQ8	50	50	1	ENSG00000136848
P35251	50	50	13	ENSG00000035928
Q9Y2G2	50	50	5	ENSG00000105483
Q99755	50	50	1	ENSG00000143398
O15068	50	50	3	ENSG00000126217
Q9H582	50	50	4	ENSG00000122482
Q96R06	50	50	4	ENSG00000076382
Q9P258	50	50	4	ENSG00000179051;ENSG00000281540
O00178	50	50	0	ENSG00000100226
A1L390	50	50	1	ENSG00000126822
P49711	50	50	3	ENSG00000102974
Q8N3U4	50	50	8	ENSG00000101972
Q99523	50	50	0	ENSG00000134243
Q8N163	50	50	1	ENSG00000158941
O60658	50	50	1	ENSG00000073417
Q8TAA9	50	50	5	ENSG00000173218
Q9Y4F4	50	50	1	ENSG00000198718
Q8N3R9	50	50	2	ENSG00000072415
Q15022	50	50	2	ENSG00000178691
Q58EX7	50	50	1	ENSG00000196155
Q9UKY4	50	50	1	ENSG00000009830
O00267	50	50	1	ENSG00000196235
Q9H4L7	50	50	2	ENSG00000163104
Q9P217	50	50	1	ENSG00000162415
Q14587	50	50	1	ENSG00000090612
Q6PCD5	50	50	0	ENSG00000168411
Q8N1G2	50	50	6	ENSG00000137200
Q9H2U1	50	50	0	ENSG00000174953
Q86W56	50	50	2	ENSG00000227345
Q96EB6	50	50	1	ENSG00000096717
Q68CR1	50	50	0	ENSG00000091490
Q96DR7	50	50	1	ENSG00000114790;ENSG00000277101
Q96RR4	50	50	1	ENSG00000110931
Q6ZQN7	50	50	3	ENSG00000173930
Q96AX9	50	50	1	ENSG00000197530
P56817	50	50	0	ENSG00000186318
Q6P0Q8	50	50	1	ENSG00000086015
O95267	50	50	4	ENSG00000172575
Q69YQ0	50	50	9	ENSG00000100014
Q14694	50	50	1	ENSG00000103194
Q13563	50	50	1	ENSG00000118762
Q92831	50	50	0	ENSG00000114166
O43313	50	50	0	ENSG00000166454
O94855	50	50	1	ENSG00000150961
Q92674	50	50	6	ENSG00000102384
Q9UPN4	50	50	2	ENSG00000141577
O60841	50	50	15	ENSG00000158417
Q7L3V2	50	50	1	ENSG00000215012
Q9P0U3	50	50	1	ENSG00000079387
P18858	50	50	8	ENSG00000105486
O75123	50	50	2	ENSG00000183309;ENSG00000276340
Q8IXQ6	50	50	4	ENSG00000138496
Q9HCE9	50	50	3	ENSG00000074855
Q86SQ0	50	50	4	ENSG00000144824
Q7LFX5	50	50	4	ENSG00000182022
Q9HCL2	50	50	2	ENSG00000119927
Q9UF56	50	50	3	ENSG00000145743
Q96BN8	50	50	1	ENSG00000154124
Q9UH99	50	50	4	ENSG00000100242
Q9Y4W6	50	50	0	ENSG00000141385
Q96CC6	50	50	3	ENSG00000007384
P50542	50	50	2	ENSG00000139197;ENSG00000288217
Q9BXB4	50	50	4	ENSG00000144909
P42285	50	50	10	ENSG00000039123
Q9BVG8	50	50	0	ENSG00000140859
Q96RR1	50	50	1	ENSG00000107815
Q9NR30	50	50	10	ENSG00000165732
O75815	50	50	1	ENSG00000137936
Q8N5C6	50	50	5	ENSG00000068784
P54886	50	50	1	ENSG00000059573
Q8IVH2	50	50	0	ENSG00000137166
O95785	50	50	0	ENSG00000011451
Q9UQL6	50	50	1	ENSG00000108840
Q02447	50	50	2	ENSG00000172845
Q9UK61	50	50	1	ENSG00000163946
Q13263	50	50	1	ENSG00000130726
P78563	50	50	2	ENSG00000197381
Q96L34	50	50	1	ENSG00000007047
Q96GM5	50	50	0	ENSG00000066117
O00167	50	50	3	ENSG00000064655
O76024	50	50	0	ENSG00000109501
Q86UE8	50	50	2	ENSG00000146872
Q96F81	50	50	2	ENSG00000154309
Q9NU19	50	50	6	ENSG00000065491
Q9UHV5	50	50	4	ENSG00000108352
Q9Y2L9	50	50	0	ENSG00000136141
P11387	50	50	10	ENSG00000198900
Q4G0N4	50	50	0	ENSG00000152620
Q96NN9	50	50	6	ENSG00000183773
Q9UP95	50	50	0	ENSG00000124067
Q13634	50	50	3	ENSG00000145526
P27540	50	50	1	ENSG00000143437
Q9UKI8	50	50	0	ENSG00000198586
Q5VWQ0	50	50	2	ENSG00000081019
O60313	50	50	4	ENSG00000198836
Q8IX12	50	50	1	ENSG00000060339
Q8IZA0	50	50	3	ENSG00000142687
Q96PQ6	50	50	1	ENSG00000130803
P55884	50	50	0	ENSG00000106263
Q9ULD5	50	50	1	ENSG00000196453
Q8N442	50	50	0	ENSG00000151806
O43865	50	50	6	ENSG00000168710
Q8WUA4	50	50	1	ENSG00000115207
Q96PQ7	50	50	0	ENSG00000109790
P51814	50	50	2	ENSG00000147124
Q9UKN5	50	50	0	ENSG00000110851
Q9UKB1	50	50	1	ENSG00000072803
Q7L2J0	50	50	2	ENSG00000146834
Q13620	50	50	1	ENSG00000158290
P49916	50	50	3	ENSG00000005156
Q8TCJ2	50	50	3	ENSG00000163527
Q8NEY1	50	50	4	ENSG00000134369
Q9UGJ0	50	50	7	ENSG00000106617
Q6NXT6	50	50	0	ENSG00000169762
Q01094	50	50	0	ENSG00000101412
A0FGR8	50	50	0	ENSG00000117868
O96020	50	50	8	ENSG00000175305
O43290	50	50	6	ENSG00000175467
P05165	50	50	1	ENSG00000175198
P06396	50	50	0	ENSG00000148180
P07947	50	50	5	ENSG00000176105
Q7L8L6	50	50	2	ENSG00000215251
Q8TF68	50	50	3	ENSG00000126746
Q7Z5Y7	50	50	1	ENSG00000112078
Q15572	50	50	0	ENSG00000103168
Q9UPI3	50	50	0	ENSG00000119686
P14923	50	50	2	ENSG00000173801
Q9P1Q0	50	50	3	ENSG00000143952
Q9NSE4	50	50	1	ENSG00000067704
Q9BWE0	50	50	1	ENSG00000214022
Q8NB50	50	50	5	ENSG00000196670
Q92804	50	50	0	ENSG00000270647;ENSG00000276833
Q6NUQ4	50	50	4	ENSG00000119777
Q9NTI2	50	50	4	ENSG00000132932
Q8NEM2	50	50	2	ENSG00000171241
Q96N77	50	50	0	ENSG00000167528
Q9BXB5	50	50	0	ENSG00000144645
P49736	50	50	0	ENSG00000073111
P15170	50	50	1	ENSG00000103342
Q9H078	50	50	1	ENSG00000162129
A6NIX2	50	50	0	ENSG00000142279
P49796	50	50	0	ENSG00000138835
Q5T5J6	50	50	8	ENSG00000116668
Q96JN2	50	50	2	ENSG00000128596
Q9HCG7	50	50	3	ENSG00000070610
Q07820	50	50	2	ENSG00000143384
Q7L1V2	50	50	0	ENSG00000103111
Q86UA1	50	50	0	ENSG00000185246
Q9Y2I9	50	50	0	ENSG00000111490
Q9Y2F9	50	50	9	ENSG00000132640
Q9UJ14	50	50	1	ENSG00000131067
Q9BUQ8	50	50	7	ENSG00000174243
Q12852	50	50	2	ENSG00000139625
P98175	50	50	0	ENSG00000182872
O60341	50	50	2	ENSG00000004487
P45844	50	50	1	ENSG00000160179
O75129	50	50	0	ENSG00000148219
P49768	50	50	0	ENSG00000080815
O95235	50	50	1	ENSG00000112984
Q01433	50	50	1	ENSG00000116337
Q7Z6M2	50	50	0	ENSG00000165355
Q4FZB7	50	50	7	ENSG00000110066
P43354	50	50	1	ENSG00000153234
Q9P2M4	50	50	4	ENSG00000132405
Q8N6S4	50	50	5	ENSG00000118454
Q9Y6Y8	50	50	1	ENSG00000107651
O43847	50	50	1	ENSG00000078618
P48378	50	50	1	ENSG00000087903
P51812	50	50	2	ENSG00000177189
Q6SZW1	50	50	1	ENSG00000004139
Q14527	50	50	2	ENSG00000071794
Q4J6C6	50	50	9	ENSG00000138078
Q9NUU7	50	50	6	ENSG00000168872
Q9ULD6	50	50	0	ENSG00000164066
P51798	50	50	2	ENSG00000103249
P11182	50	50	3	ENSG00000137992
P57740	50	50	2	ENSG00000111581
Q9NUJ3	50	50	5	ENSG00000176148
P48067	50	50	0	ENSG00000196517
Q5VTQ0	50	50	0	ENSG00000155158
Q9Y620	50	50	5	ENSG00000197275
Q6YI46	50	50	0	ENSG00000180694
P11801	50	50	7	ENSG00000159792
Q9H3D4	50	50	1	ENSG00000073282
Q9Y5Y6	50	50	7	ENSG00000149418
Q86V24	50	50	1	ENSG00000006831;ENSG00000285070
Q9H967	50	50	5	ENSG00000092470
P36776	50	50	0	ENSG00000196365
P18433	50	50	2	ENSG00000132670
Q13641	50	50	0	ENSG00000146242;ENSG00000283085
Q9UP83	50	50	0	ENSG00000164597
Q6PJP8	50	50	9	ENSG00000198924
Q5FWF5	50	50	12	ENSG00000141446
Q9H869	50	50	2	ENSG00000163374
Q9H6R3	50	50	2	ENSG00000111058
O60879	50	50	5	ENSG00000147202
Q969R2	50	50	2	ENSG00000184792
Q9P2Y4	50	50	0	ENSG00000165804
Q07002	50	50	3	ENSG00000117266
Q9GZR1	50	50	4	ENSG00000112701
Q9UDV7	50	50	0	ENSG00000170265
Q8WVT3	50	50	0	ENSG00000171853
Q8NBS3	50	50	1	ENSG00000088836
Q96MM7	50	50	0	ENSG00000171004
Q8TDD1	50	50	5	ENSG00000123064
Q9BW19	50	50	6	ENSG00000204197;ENSG00000237649;ENSG00000233450
Q15418	50	50	4	ENSG00000117676;ENSG00000281877
Q8N461	50	50	4	ENSG00000127585
O95544	50	50	3	ENSG00000008130
Q13614	50	50	2	ENSG00000087053
Q8TAV5	50	50	0	ENSG00000174370
Q15361	50	50	7	ENSG00000125482
P23443	50	50	0	ENSG00000108443
Q8IWF6	50	50	0	ENSG00000174839
Q96KQ7	50	50	1	ENSG00000204371;ENSG00000206376;ENSG00000238134;ENSG00000236759;ENSG00000232045;ENSG00000227333
O00411	50	50	2	ENSG00000099821
Q96BD0	50	50	1	ENSG00000101187
Q9H8E8	50	50	0	ENSG00000149474
Q9UGN5	50	50	5	ENSG00000129484
Q96T51	50	50	0	ENSG00000176783;ENSG00000284260
Q8NHH9	50	50	0	ENSG00000119787
Q68CP4	50	50	0	ENSG00000165102
Q9NXH9	50	50	0	ENSG00000104907
Q9BVL2	50	50	0	ENSG00000139496
P00390	50	50	0	ENSG00000104687
Q96SZ6	50	50	0	ENSG00000101391
A5D8V7	50	50	3	ENSG00000198003
Q9NS15	50	50	0	ENSG00000168056
Q9H6W3	50	50	4	ENSG00000170468
P51522	50	50	6	ENSG00000167766
A6NJ78	50	50	2	ENSG00000169519
O94826	50	50	1	ENSG00000154174
Q9NWK9	50	50	1	ENSG00000117174
Q8NFI3	50	50	1	ENSG00000167280
Q8TE04	50	50	2	ENSG00000152782
P36551	50	50	0	ENSG00000080819
Q9NVV4	50	50	1	ENSG00000107951
Q8N436	50	50	0	ENSG00000121898
Q13574	50	50	2	ENSG00000149091
Q32NB8	50	50	0	ENSG00000087157
Q8IUH5	50	50	3	ENSG00000186908
Q8IY17	50	50	1	ENSG00000032444
Q9HCG8	50	50	2	ENSG00000163510
Q9NR81	50	50	5	ENSG00000163947
Q14159	50	50	2	ENSG00000164808
Q96EY7	50	50	1	ENSG00000132300
Q7Z2T5	50	50	1	ENSG00000121486
O94782	50	50	7	ENSG00000162607
P00367	50	50	0	ENSG00000148672
O95947	50	50	1	ENSG00000149922
Q8WUY3	50	50	6	ENSG00000106772
Q8WUY3	50	50	6	ENSG00000106772
Q8WUY3	50	50	6	ENSG00000106772
Q8WUY3	50	50	6	ENSG00000106772
P34925	50	50	0	ENSG00000163785
Q8N2S1	50	50	0	ENSG00000090006
Q6PI78	50	50	0	ENSG00000164983
Q86UD5	50	50	3	ENSG00000164038
P26599	50	50	4	ENSG00000011304
P25490	50	50	0	ENSG00000100811
P48751	50	50	1	ENSG00000114923
O96005	50	50	0	ENSG00000104853
Q6PF06	50	50	2	ENSG00000165275
Q9BZJ0	50	50	2	ENSG00000101343
Q6YBV0	50	50	1	ENSG00000180773
O14777	50	50	6	ENSG00000080986
Q9HB90	50	50	1	ENSG00000116954
Q7Z736	50	50	0	ENSG00000068137
Q9H4K7	50	50	1	ENSG00000101181
O75943	50	50	4	ENSG00000152942;ENSG00000276618
O95831	50	50	2	ENSG00000156709
Q86VR7	50	50	1	ENSG00000186806
Q17RM4	50	50	0	ENSG00000135637
P04049	50	50	3	ENSG00000132155
Q8NE86	50	50	0	ENSG00000156026
P13631	50	50	1	ENSG00000172819
Q6PCB8	50	50	0	ENSG00000170571
Q9Y232	50	50	5	ENSG00000153046
Q03518	50	50	0	ENSG00000168394;ENSG00000206297;ENSG00000226173;ENSG00000227816;ENSG00000230705;ENSG00000224212;ENSG00000232367
P43251	50	50	2	ENSG00000169814
Q92903	50	50	1	ENSG00000163624
Q9H0X9	50	50	4	ENSG00000021762
Q9NRL3	50	50	1	ENSG00000090372
Q96A46	50	50	0	ENSG00000155287
Q8WUB8	50	50	2	ENSG00000130024
Q5U5R9	50	50	3	ENSG00000165338
Q14188	50	50	4	ENSG00000114126
Q86V20	50	50	4	ENSG00000122376
P22736	50	50	1	ENSG00000123358
Q8IYQ7	50	50	6	ENSG00000185875
O60381	50	50	3	ENSG00000105856;ENSG00000283847
Q92830	50	50	0	ENSG00000108773
P04920	50	50	1	ENSG00000164889
Q9UBL3	50	50	1	ENSG00000129691
P49448	50	50	1	ENSG00000182890;ENSG00000288118
Q9UHB9	50	50	3	ENSG00000167881
Q6UB35	50	50	0	ENSG00000120254
Q9HBH9	50	50	3	ENSG00000099875
Q8N9U0	50	50	3	ENSG00000165929;ENSG00000276776
Q15311	50	50	1	ENSG00000017797
Q96TA2	50	50	1	ENSG00000136758
Q9NYY8	50	50	4	ENSG00000118246
Q92796	50	50	2	ENSG00000082458
Q96GJ1	50	50	3	ENSG00000188917
Q8NFR9	50	50	0	ENSG00000163701
Q96IK5	50	50	1	ENSG00000087338
O75530	50	50	3	ENSG00000074266
Q8WUM0	50	50	1	ENSG00000069248
Q9UDT6	50	50	5	ENSG00000106665
P21953	50	50	0	ENSG00000083123
Q9UHN1	50	50	3	ENSG00000256525
P78344	50	50	3	ENSG00000110321
Q5JTV8	50	50	0	ENSG00000143337
Q96SB4	50	50	8	ENSG00000096063
P19012	50	50	0	ENSG00000171346
Q9H0W8	50	50	1	ENSG00000105771
Q92802	50	50	5	ENSG00000244754
Q9UKZ1	50	50	0	ENSG00000158435
Q9NUT2	50	50	2	ENSG00000197150
P49840	50	50	1	ENSG00000105723
O75747	50	50	2	ENSG00000139144
Q8WV16	50	50	1	ENSG00000119599
P52824	50	50	0	ENSG00000145214
Q9NV64	50	50	0	ENSG00000176142
Q6P2D8	50	50	7	ENSG00000166435
Q6ZMZ0	50	50	3	ENSG00000116514
Q9BXY5	50	50	3	ENSG00000180881
Q9NTG7	50	50	0	ENSG00000142082
Q969S9	50	50	3	ENSG00000164347
P13667	50	50	1	ENSG00000155660
P35790	50	50	3	ENSG00000110721
Q7Z478	50	50	7	ENSG00000067248
P46199	50	50	2	ENSG00000085760
Q8TE77	50	50	0	ENSG00000172830
Q9BRS2	50	50	3	ENSG00000124784
P10075	50	50	1	ENSG00000250571
O43615	50	50	1	ENSG00000104980
P13646	50	50	0	ENSG00000171401
O00330	50	50	1	ENSG00000110435
Q8TE82	50	50	1	ENSG00000125089
Q15293	50	50	2	ENSG00000049449
Q8NC60	50	50	0	ENSG00000084092
Q9Y697	50	50	1	ENSG00000244005
Q9BQF6	50	50	8	ENSG00000138468
Q96GZ6	50	50	2	ENSG00000114544
A0AUZ9	50	50	4	ENSG00000144445
O75570	50	50	0	ENSG00000120662
Q96QU6	50	50	3	ENSG00000110455
P49748	50	50	1	ENSG00000072778
P28702	50	50	1	ENSG00000204231;ENSG00000206289;ENSG00000228333;ENSG00000235712;ENSG00000231321;ENSG00000227322
P22735	50	50	0	ENSG00000092295;ENSG00000285348
Q12797	50	50	5	ENSG00000198363
Q96CP6	50	50	3	ENSG00000089351
Q9NQX7	50	50	5	ENSG00000135916
Q96MK2	50	50	1	ENSG00000042062
O75027	50	50	1	ENSG00000131269
Q96PZ0	50	50	5	ENSG00000091127
Q5SQH8	50	50	0	ENSG00000204564;ENSG00000206487;ENSG00000233164;ENSG00000237100;ENSG00000233641;ENSG00000237012;ENSG00000224120
O15211	50	50	0	ENSG00000206282;ENSG00000224841;ENSG00000228736;ENSG00000237825;ENSG00000237441
Q9HBU6	50	50	0	ENSG00000139163
Q9NUJ1	50	50	0	ENSG00000144827
Q5TGI0	50	50	0	ENSG00000146267
Q9UID6	50	50	5	ENSG00000121864
O43242	50	50	4	ENSG00000108344
Q6Q0C0	50	50	2	ENSG00000131653
Q96AG3	50	50	0	ENSG00000164209
Q8N8Q8	50	50	1	ENSG00000163626
Q96F83	50	50	1	ENSG00000140104
Q6NX45	50	50	3	ENSG00000196391
Q8IYB8	50	50	0	ENSG00000156502
Q8WUA7	50	50	4	ENSG00000054611
O00327	50	50	2	ENSG00000133794
Q9BQI3	50	50	2	ENSG00000086232
O60551	50	50	7	ENSG00000152465
Q9H300	50	50	1	ENSG00000175193
Q9Y2C4	50	50	2	ENSG00000157036
Q15070	50	50	1	ENSG00000155463
Q9UG56	50	50	1	ENSG00000241878
Q8N7R7	50	50	1	ENSG00000163249
Q9HBA0	50	50	0	ENSG00000111199
Q7Z695	50	50	1	ENSG00000133597
P22830	50	50	1	ENSG00000066926
Q5T1V6	50	50	6	ENSG00000118197
Q96A54	50	50	4	ENSG00000159346
Q14154	50	50	1	ENSG00000081791
Q96BP3	50	50	1	ENSG00000113593
Q6PML9	50	50	0	ENSG00000014824
Q5T0D9	50	50	0	ENSG00000158109
O43790	50	50	0	ENSG00000170442
Q8NHY2	50	50	0	ENSG00000143207
Q6DKK2	50	50	0	ENSG00000011295
Q8N0U4	50	50	0	ENSG00000222011
Q5VTE6	50	50	1	ENSG00000174606
Q92619	50	50	6	ENSG00000180448
Q9NVA1	50	50	0	ENSG00000101019
Q9GZU3	50	50	0	ENSG00000121775
O75879	50	50	0	ENSG00000059691
Q8TDG4	50	50	2	ENSG00000163312
P31350	50	50	3	ENSG00000171848
P10276	50	50	0	ENSG00000131759
Q9BZ23	50	50	0	ENSG00000125779
Q66K89	50	50	0	ENSG00000167967
P82675	50	50	1	ENSG00000144029
Q96D53	50	50	2	ENSG00000123815
Q9BX70	50	50	0	ENSG00000133243
P83111	50	50	0	ENSG00000103642
Q9NZN8	50	50	3	ENSG00000111596
P08631	50	50	3	ENSG00000101336
Q8WV93	50	50	2	ENSG00000135537
Q9NSV4	50	50	2	ENSG00000139734
Q14449	50	50	0	ENSG00000115290
Q86X29	50	50	1	ENSG00000105699
Q53GS9	50	50	4	ENSG00000168883
Q7Z6M4	50	50	1	ENSG00000122085
P98182	50	50	5	ENSG00000010539
Q9Y330	50	50	2	ENSG00000206366;ENSG00000204366;ENSG00000234196;ENSG00000237900;ENSG00000234852
Q9H3K2	50	50	4	ENSG00000165678
Q13596	50	50	0	ENSG00000028528
P04632	50	50	1	ENSG00000126247
Q8IZ69	50	50	2	ENSG00000099899
Q6NUS6	50	50	0	ENSG00000119977
A6NCJ1	50	50	1	ENSG00000183397
P06576	50	50	0	ENSG00000110955
Q8N531	50	50	0	ENSG00000182325;ENSG00000285442
Q32P41	50	50	2	ENSG00000126814
Q15198	50	50	10	ENSG00000104213
Q9BSF8	50	50	5	ENSG00000148925
Q9BQ39	50	50	6	ENSG00000107625
Q9H2D6	50	50	0	ENSG00000100106
O43824	50	50	0	ENSG00000178605
Q9BW91	50	50	1	ENSG00000170502
O43818	50	50	7	ENSG00000114767
Q9NZJ7	50	50	0	ENSG00000137409
P50579	50	50	8	ENSG00000111142
Q9NRD0	50	50	1	ENSG00000164117
Q96BW1	50	50	1	ENSG00000094841
Q9BPX6	50	50	0	ENSG00000107745
Q9UHX1	50	50	3	ENSG00000179950;ENSG00000274081
Q9NWZ5	50	50	1	ENSG00000198276
Q92521	50	50	6	ENSG00000069943
O75208	50	50	1	ENSG00000088682
Q53GI3	50	50	2	ENSG00000160908
P09131	50	50	1	ENSG00000126903
Q5T2R2	50	50	2	ENSG00000148459
Q64LD2	50	50	1	ENSG00000176473
Q8N187	50	50	1	ENSG00000138380
Q9NXG6	50	50	1	ENSG00000178467
P37231	50	50	0	ENSG00000132170
Q12791	50	50	0	ENSG00000156113
Q96LB3	50	50	1	ENSG00000096872
Q9Y2S7	50	50	0	ENSG00000004142
O95197	50	50	1	ENSG00000133318
P14324	50	50	0	ENSG00000160752
Q9P2K1	50	50	7	ENSG00000048342
O75907	50	50	0	ENSG00000185000;ENSG00000285482
Q9H3H3	50	50	0	ENSG00000175573
Q16600	50	50	0	ENSG00000196793
O96008	50	50	0	ENSG00000130204
Q8N475	50	50	5	ENSG00000168843
Q969M3	50	50	1	ENSG00000145817
Q8IV48	50	50	3	ENSG00000104626
Q7Z3B4	50	50	0	ENSG00000138750
Q9BQ95	50	50	0	ENSG00000130159
P49759	50	50	8	ENSG00000013441
Q9H6A0	50	50	1	ENSG00000162777
Q96KE9	50	50	0	ENSG00000184887
Q14296	50	50	0	ENSG00000164896
P49753	50	50	3	ENSG00000119673
Q14257	50	50	1	ENSG00000117906
O43464	50	50	0	ENSG00000115317
P07948	50	50	5	ENSG00000254087
Q5TC12	50	50	0	ENSG00000123472
Q96AQ8	50	50	0	ENSG00000050393
Q6ZN54	50	50	0	ENSG00000140995
Q9H074	50	50	1	ENSG00000172239
Q8N7B6	50	50	4	ENSG00000163138
Q6P531	50	50	2	ENSG00000167741
Q96E29	50	50	2	ENSG00000156469
Q9H9E1	50	50	1	ENSG00000164331
Q7L2Z9	50	50	12	ENSG00000031691
Q2MV58	50	50	0	ENSG00000204852
Q3ZCQ8	50	50	1	ENSG00000105197
Q9BPW8	50	50	2	ENSG00000184117
Q8IYU8	50	50	1	ENSG00000165487
P14635	50	50	6	ENSG00000134057
Q9NWS8	50	50	3	ENSG00000155906
Q96H96	50	50	0	ENSG00000173085
Q9NXX6	50	50	0	ENSG00000107672
Q9HD23	50	50	0	ENSG00000124532
Q9H813	50	50	1	ENSG00000065600
O00154	50	50	1	ENSG00000097021
P11474	50	50	3	ENSG00000173153
Q5U4P2	50	50	3	ENSG00000174939
Q7L2H7	50	50	2	ENSG00000149100
Q9Y375	50	50	5	ENSG00000137806
Q6NS38	50	50	4	ENSG00000189046
Q15435	50	50	3	ENSG00000115685
Q9UBS0	50	50	0	ENSG00000175634
Q5VV63	50	50	0	ENSG00000107518
Q9NRX1	50	50	3	ENSG00000115946
Q9BVS5	50	50	0	ENSG00000171103
P78385	50	50	0	ENSG00000170523
Q330K2	50	50	0	ENSG00000156170
O43414	50	50	0	ENSG00000117419
Q96DB5	50	50	0	ENSG00000176623
Q07021	50	50	0	ENSG00000108561
Q9NV92	50	50	0	ENSG00000102471
Q9HB09	50	50	0	ENSG00000126453
Q9BXI6	50	50	1	ENSG00000099992
O43283	50	50	3	ENSG00000073803
Q7L0Y3	50	50	4	ENSG00000174173
Q5BJH7	50	50	2	ENSG00000167645
O75319	50	50	0	ENSG00000144048
Q9P016	50	50	8	ENSG00000151500
Q14533	50	50	0	ENSG00000205426
Q9NXZ2	50	50	1	ENSG00000080007
B0YJ81	50	50	0	ENSG00000165996
O95070	50	50	1	ENSG00000174851
Q8NCW5	50	50	1	ENSG00000163382
P13645	50	50	2	ENSG00000186395
P48556	50	50	1	ENSG00000099341
Q13133	50	50	1	ENSG00000025434
O95201	50	50	3	ENSG00000122386
P08729	50	50	0	ENSG00000135480
Q9NZJ6	50	50	4	ENSG00000132423
Q8N0W5	50	50	1	ENSG00000174628
A0A087WUL8	50	50	5	ENSG00000271383
A0A087WUL8	50	50	5	ENSG00000271383
A0A087WUL8	50	50	5	ENSG00000271383
A0A087WUL8	50	50	5	ENSG00000271383
A0A087WUL8	50	50	5	ENSG00000271383
A0A087WUL8	50	50	5	ENSG00000271383
A0A087WUL8	50	50	5	ENSG00000271383
A0A087WUL8	50	50	5	ENSG00000271383
A0A087WUL8	50	50	5	ENSG00000271383
A0A087WUL8	50	50	5	ENSG00000271383
A0A087WUL8	50	50	5	ENSG00000271383
A0A096LP49	50	50	3	ENSG00000260220
A0A0A6YYL3	50	50	4	ENSG00000233917
A0A0G2JLE6	50	50	0	ENSG00000261968
A0A0G2JNJ9	50	50	3	ENSG00000276253
A0A0U1RRI6	50	50	1	ENSG00000224109
A0A140TA64	50	50	0	ENSG00000266286
A0A1W2PR48	50	50	1	ENSG00000260734
A0A1W2PS18	50	50	1	ENSG00000283758
A0A286YEV6	50	50	0	ENSG00000284631
A0A286YEY9	50	50	0	ENSG00000284629
A0A286YF46	50	50	0	ENSG00000284667
A0A286YF77	50	50	0	ENSG00000284725
A0A286YFB4	50	50	0	ENSG00000284643
A0A286YFG1	50	50	0	ENSG00000284635
A0A2R8YFR7	50	50	1	ENSG00000285408
A0A494C086	50	50	2	ENSG00000230358
A0A494C1R9	50	50	1	ENSG00000238074
A0A590UJ96	50	50	2	ENSG00000282936
A0JP26	50	50	5	ENSG00000278522
A0PG75	50	50	1	ENSG00000231213
A0PJY2	50	50	3	ENSG00000128610
A1L4K1	50	50	2	ENSG00000186628
A1L4Q6	50	50	0
A2RUR9	50	50	3	ENSG00000170160
A4D0Y5	50	50	4
A4D1F6	50	50	5	ENSG00000240720
A4D250	50	50	1
A4D2B8	50	50	1
A4FU69	50	50	5	ENSG00000176927
A4UGR9	50	50	2	ENSG00000163092
A5A3E0	50	50	5	ENSG00000196604
A6NCF6	50	50	3
A6NCI4	50	50	7	ENSG00000175267
A6NCI8	50	50	0	ENSG00000187833
A6NCW0	50	50	2	ENSG00000225327
A6NCW7	50	50	2	ENSG00000236125
A6NGE4	50	50	0	ENSG00000226372
A6NGG8	50	50	5	ENSG00000179270
A6NGW2	50	50	1
A6NHQ2	50	50	3	ENSG00000188573
A6NHY2	50	50	2	ENSG00000189045
A6NI47	50	50	5	ENSG00000222036
A6NIE6	50	50	2
A6NIR3	50	50	0	ENSG00000172650
A6NIY4	50	50	2	ENSG00000170092
A6NJ88	50	50	0
A6NJR5	50	50	5
A6NKD2	50	50	1	ENSG00000168757
A6NKG5	50	50	2	ENSG00000254656
A6NKU9	50	50	1	ENSG00000214300
A6NKX1	50	50	2
A6NMB9	50	50	1	ENSG00000261308
A6NMN3	50	50	1	ENSG00000172538
A6NMX2	50	50	3	ENSG00000175766
A6NNV3	50	50	5	ENSG00000185040
A6NP61	50	50	1	ENSG00000189167
A7MBM2	50	50	1	ENSG00000140323
A8K0R7	50	50	1	ENSG00000022976
A8K554	50	50	2
A8MPX8	50	50	8	ENSG00000183977
A8MTI9	50	50	3
A8MTY7	50	50	1	ENSG00000180386;ENSG00000262221
A8MUK1	50	50	2	ENSG00000227140
A8MUL3	50	50	1
A8MUX0	50	50	1	ENSG00000212657;ENSG00000263186
A8MWK0	50	50	7
A8MWP6	50	50	NA
A8MXK9	50	50	NA
A8MXZ3	50	50	1	ENSG00000240542
A8MYX2	50	50	0
B2RC85	50	50	8	ENSG00000169402
B2RU33	50	50	6	ENSG00000183206
B3EWF7	50	50	1
B7ZBB8	50	50	0	ENSG00000219607
C9J2P7	50	50	2	ENSG00000223569
C9JC47	50	50	2
C9JE40	50	50	2	ENSG00000229474
C9JJH3	50	50	2	ENSG00000231396
C9JL84	50	50	5	ENSG00000132297
C9JLJ4	50	50	2	ENSG00000232399
C9JPN9	50	50	2	ENSG00000227551
C9JVI0	50	50	2	ENSG00000233136
D6R901	50	50	2	ENSG00000249811
D6R9N7	50	50	2	ENSG00000250844
D6RA61	50	50	2	ENSG00000248933
D6RBM5	50	50	2	ENSG00000250913
D6RBQ6	50	50	2	ENSG00000249104
D6RCP7	50	50	2	ENSG00000248920
D6RIA3	50	50	1	ENSG00000248713
D6RJB6	50	50	2	ENSG00000250745
E2RYF6	50	50	1	ENSG00000261272
E9PAV3	50	50	0	ENSG00000196531
G5E9R7	50	50	1	ENSG00000241241;ENSG00000262520
H3BUK9	50	50	4	ENSG00000230031
J3KSC0	50	50	1
M0R2J8	50	50	2	ENSG00000170959
O00221	50	50	1	ENSG00000146232
O00254	50	50	3	ENSG00000164220
O00337	50	50	1	ENSG00000156222
O00400	50	50	2	ENSG00000169359
O00482	50	50	2	ENSG00000116833
O00555	50	50	1	ENSG00000141837
O14603	50	50	0	ENSG00000169789;ENSG00000169807;ENSG00000169763
O14654	50	50	0	ENSG00000133124
O14791	50	50	1	ENSG00000100342
O15018	50	50	1	ENSG00000133401
O15018	50	50	1	ENSG00000133401
O15069	50	50	0	ENSG00000136274
O15391	50	50	0	ENSG00000230797
O15457	50	50	0	ENSG00000057468
O15537	50	50	3	ENSG00000102104
O43182	50	50	3	ENSG00000047648
O43236	50	50	3	ENSG00000108387
O43497	50	50	1	ENSG00000006283
O43525	50	50	2	ENSG00000184156
O43526	50	50	5	ENSG00000075043
O43623	50	50	4	ENSG00000019549
O43781	50	50	2	ENSG00000143479
O43868	50	50	3	ENSG00000137860
O60281	50	50	0	ENSG00000188994
O60281	50	50	0	ENSG00000188994
O60281	50	50	0	ENSG00000188994
O60346	50	50	0	ENSG00000081913
O60347	50	50	2	ENSG00000108239
O60481	50	50	0	ENSG00000156925
O60673	50	50	3	ENSG00000009413
O60673	50	50	3	ENSG00000009413
O60673	50	50	3	ENSG00000009413
O60673	50	50	3	ENSG00000009413
O60673	50	50	3	ENSG00000009413
O60732	50	50	1	ENSG00000155495
O60741	50	50	4	ENSG00000164588
O60840	50	50	2	ENSG00000102001
O75077	50	50	1	ENSG00000114948
O75127	50	50	0	ENSG00000106246
O75333	50	50	0	ENSG00000167800
O75339	50	50	4	ENSG00000138615
O75604	50	50	4	ENSG00000036672
O75678	50	50	0	ENSG00000128253
O75783	50	50	2	ENSG00000103269
O75912	50	50	0	ENSG00000157680
O76009	50	50	0	ENSG00000006059;ENSG00000261986
O76014	50	50	0	ENSG00000108417;ENSG00000263022
O76015	50	50	0	ENSG00000171360
O76042	50	50	3
O76081	50	50	1	ENSG00000147509
O94759	50	50	2	ENSG00000142185
O94779	50	50	5	ENSG00000149972
O94819	50	50	0	ENSG00000176595;ENSG00000273645
O94921	50	50	7	ENSG00000058091
O94989	50	50	1	ENSG00000198844
O95153	50	50	0	ENSG00000005379
O95156	50	50	2	ENSG00000144227
O95185	50	50	1	ENSG00000182168
O95236	50	50	0	ENSG00000128284
O95263	50	50	0	ENSG00000113231
O95343	50	50	0	ENSG00000138083
O95398	50	50	1	ENSG00000079337
O95411	50	50	NA
O95436	50	50	5	ENSG00000157765
O95568	50	50	3	ENSG00000171806
O95622	50	50	2	ENSG00000173175
O95672	50	50	1	ENSG00000171551
O95678	50	50	0	ENSG00000170454
O95744	50	50	6
O95789	50	50	7	ENSG00000163867
P02533	50	50	1	ENSG00000186847
P02538	50	50	0	ENSG00000205420
P03971	50	50	0	ENSG00000104899
P04264	50	50	0	ENSG00000167768
P05546	50	50	4	ENSG00000099937
P06241	50	50	3	ENSG00000010810
P07101	50	50	2	ENSG00000180176
P07197	50	50	0	ENSG00000104722
P07358	50	50	3	ENSG00000021852
P08048	50	50	0	ENSG00000067646
P08235	50	50	1	ENSG00000151623
P08572	50	50	2	ENSG00000134871
P08588	50	50	0	ENSG00000043591
P08697	50	50	1	ENSG00000167711;ENSG00000276838
P08779	50	50	1	ENSG00000186832
P08922	50	50	3	ENSG00000047936
P09486	50	50	0	ENSG00000113140
P09769	50	50	4	ENSG00000000938
P0C091	50	50	0	ENSG00000183090
P0C1S8	50	50	6	ENSG00000214102;ENSG00000263042
P0C7A2	50	50	1	ENSG00000182230
P0C7H8	50	50	0	ENSG00000212724;ENSG00000262862
P0C7H9	50	50	2	ENSG00000226430
P0C7I0	50	50	2	ENSG00000237038
P0C7T7	50	50	2
P0C7V0	50	50	3
P0C7V8	50	50	0	ENSG00000189186
P0C7V9	50	50	3
P0C853	50	50	3
P0C854	50	50	0
P0C881	50	50	8	ENSG00000155026
P0CF97	50	50	4	ENSG00000237765
P0CG23	50	50	0	ENSG00000236609
P0CG31	50	50	2
P0CG38	50	50	5	ENSG00000196834
P0CG39	50	50	5	ENSG00000222038
P0CG40	50	50	3	ENSG00000217236
P0CG42	50	50	2
P0CG43	50	50	2
P0CH98	50	50	0
P0CV98	50	50	1	ENSG00000228927
P0CV99	50	50	1	ENSG00000233803
P0CW00	50	50	1	ENSG00000229549
P0CW01	50	50	1	ENSG00000236424
P0DPD6	50	50	2	ENSG00000145194
P0DPF2	50	50	1
P0DPF2	50	50	1
P0DPF2	50	50	1
P0DPF2	50	50	1
P0DPF2	50	50	1
P0DPF2	50	50	1
P0DPF2	50	50	1
P0DPF2	50	50	1
P0DPF2	50	50	1
P0DPF2	50	50	1
P0DPF2	50	50	1
P0DPF2	50	50	1
P0DPF2	50	50	1
P0DPF2	50	50	1
P0DSO2	50	50	0
P10070	50	50	4	ENSG00000074047
P10589	50	50	0	ENSG00000175745
P11161	50	50	2	ENSG00000122877
P12645	50	50	2	ENSG00000152785
P13611	50	50	5	ENSG00000038427
P13611	50	50	5	ENSG00000038427
P13611	50	50	5	ENSG00000038427
P13611	50	50	5	ENSG00000038427
P13611	50	50	5	ENSG00000038427
P13611	50	50	5	ENSG00000038427
P13611	50	50	5	ENSG00000038427
P13611	50	50	5	ENSG00000038427
P13647	50	50	0	ENSG00000186081
P15036	50	50	2	ENSG00000157557
P15621	50	50	2	ENSG00000197857
P15918	50	50	7	ENSG00000166349
P17019	50	50	0	ENSG00000182141
P17036	50	50	4	ENSG00000166526
P19823	50	50	2	ENSG00000151655
P20309	50	50	0	ENSG00000133019
P20393	50	50	0	ENSG00000126368
P20592	50	50	5	ENSG00000183486
P20807	50	50	1	ENSG00000092529
P20929	50	50	2	ENSG00000183091
P20930	50	50	9	ENSG00000143631
P20930	50	50	9	ENSG00000143631
P21810	50	50	0	ENSG00000182492
P22004	50	50	0	ENSG00000153162
P22083	50	50	3	ENSG00000196371
P22105	50	50	0	ENSG00000168477;ENSG00000236236;ENSG00000229353
P22460	50	50	1	ENSG00000130037
P22674	50	50	3	ENSG00000152669
P23975	50	50	2	ENSG00000103546
P24821	50	50	3	ENSG00000041982
P25067	50	50	2	ENSG00000171812
P25100	50	50	0	ENSG00000171873
P26371	50	50	1	ENSG00000254997
P27658	50	50	1	ENSG00000144810
P28223	50	50	0	ENSG00000102468
P28329	50	50	4	ENSG00000070748
P28370	50	50	0	ENSG00000102038
P29371	50	50	0	ENSG00000169836
P29376	50	50	1	ENSG00000062524
P31645	50	50	3	ENSG00000108576
P31785	50	50	1	ENSG00000147168
P33151	50	50	1	ENSG00000179776
P33402	50	50	1	ENSG00000152402
P34903	50	50	2	ENSG00000011677
P35228	50	50	6	ENSG00000007171
P35372	50	50	0	ENSG00000112038
P35410	50	50	1	ENSG00000204687;ENSG00000206470;ENSG00000206515;ENSG00000233141;ENSG00000234954;ENSG00000228377;ENSG00000228515;ENSG00000237284
P35527	50	50	0	ENSG00000171403
P40145	50	50	0	ENSG00000155897
P41145	50	50	0	ENSG00000082556
P41235	50	50	1	ENSG00000101076
P42658	50	50	2	ENSG00000130226
P42681	50	50	2	ENSG00000074966
P43355	50	50	1	ENSG00000198681
P43360	50	50	1	ENSG00000197172
P43364	50	50	4	ENSG00000185247
P46095	50	50	0	ENSG00000146360
P48443	50	50	2	ENSG00000143171
P49810	50	50	0	ENSG00000143801
P50440	50	50	0	ENSG00000171766
P51172	50	50	1	ENSG00000162572
P51451	50	50	9	ENSG00000136573
P51687	50	50	1	ENSG00000139531
P51843	50	50	1	ENSG00000169297
P51878	50	50	6	ENSG00000137757
P52179	50	50	3	ENSG00000101605
P52741	50	50	2	ENSG00000213762
P52747	50	50	0	ENSG00000166478
P53420	50	50	3	ENSG00000081052
P54098	50	50	1	ENSG00000140521
P54707	50	50	11	ENSG00000075673
P54829	50	50	0	ENSG00000110786
P55017	50	50	0	ENSG00000070915
P55285	50	50	4	ENSG00000113361
P55286	50	50	0	ENSG00000150394
P55287	50	50	3	ENSG00000140937
P55289	50	50	0	ENSG00000154162
P56524	50	50	0	ENSG00000068024
P56730	50	50	0	ENSG00000164099
P58317	50	50	0	ENSG00000197961
P58417	50	50	5	ENSG00000122584
P58512	50	50	0
P59047	50	50	3	ENSG00000171487
P59091	50	50	0
P60508	50	50	1	ENSG00000244476
P60608	50	50	0
P62508	50	50	2	ENSG00000196482
P78386	50	50	1	ENSG00000135443
P78396	50	50	1	ENSG00000133101
P78424	50	50	2	ENSG00000106536
P86452	50	50	1	ENSG00000257315
P98088	50	50	2	ENSG00000215182;ENSG00000283158
P98088	50	50	2	ENSG00000215182;ENSG00000283158
P98088	50	50	2	ENSG00000215182;ENSG00000283158
P98088	50	50	2	ENSG00000215182;ENSG00000283158
P98088	50	50	2	ENSG00000215182;ENSG00000283158
P98088	50	50	2	ENSG00000215182;ENSG00000283158
P98088	50	50	2	ENSG00000215182;ENSG00000283158
P98088	50	50	2	ENSG00000215182;ENSG00000283158
Q00013	50	50	2	ENSG00000130830
Q00537	50	50	5	ENSG00000059758
Q00872	50	50	6	ENSG00000196091
Q00975	50	50	1	ENSG00000148408
Q01484	50	50	6	ENSG00000145362
Q01534	50	50	1	ENSG00000258992
Q01546	50	50	2	ENSG00000185069
Q01826	50	50	4	ENSG00000182568
Q01973	50	50	0	ENSG00000185483
Q01974	50	50	0	ENSG00000169071
Q02318	50	50	2	ENSG00000135929
Q02446	50	50	6	ENSG00000105866
Q02505	50	50	1	ENSG00000169894
Q02505	50	50	1	ENSG00000169894
Q02505	50	50	1	ENSG00000169894
Q02505	50	50	1	ENSG00000169894
Q02505	50	50	1	ENSG00000169894
Q02505	50	50	1	ENSG00000169894
Q02817	50	50	1
Q02817	50	50	1
Q02817	50	50	1
Q03112	50	50	2	ENSG00000085276
Q03164	50	50	0	ENSG00000118058
Q03164	50	50	0	ENSG00000118058
Q03164	50	50	0	ENSG00000118058
Q03164	50	50	0	ENSG00000118058
Q03164	50	50	0	ENSG00000118058
Q03164	50	50	0	ENSG00000118058
Q03468	50	50	1	ENSG00000225830
Q03692	50	50	4	ENSG00000123500
Q04756	50	50	0	ENSG00000109758
Q05C16	50	50	8	ENSG00000173988
Q06495	50	50	0	ENSG00000131183
Q06828	50	50	0	ENSG00000122176
Q07343	50	50	4	ENSG00000184588
Q07444	50	50	5	ENSG00000205810
Q07627	50	50	0	ENSG00000188581;ENSG00000262808
Q07837	50	50	4	ENSG00000138079
Q08493	50	50	1	ENSG00000105650
Q08499	50	50	2	ENSG00000113448
Q09FC8	50	50	4	ENSG00000170954
Q09MP3	50	50	3	ENSG00000214842
Q0D2K0	50	50	0	ENSG00000172548
Q0IIN9	50	50	0
Q0VAA2	50	50	2	ENSG00000100565
Q0VFX4	50	50	3
Q0WX57	50	50	2	ENSG00000228856;ENSG00000232264;ENSG00000231051;ENSG00000230430;ENSG00000229579;ENSG00000231637;ENSG00000235780
Q10469	50	50	3	ENSG00000168282
Q12800	50	50	2	ENSG00000135457
Q12816	50	50	0	ENSG00000067445
Q12866	50	50	1	ENSG00000153208
Q13023	50	50	1	ENSG00000151320
Q13093	50	50	3	ENSG00000146070
Q13201	50	50	4	ENSG00000138722
Q13219	50	50	0	ENSG00000182752
Q13233	50	50	1	ENSG00000095015
Q13474	50	50	0	ENSG00000102385
Q13621	50	50	0	ENSG00000074803
Q13627	50	50	1	ENSG00000157540
Q13670	50	50	4
Q13936	50	50	0	ENSG00000151067;ENSG00000285479
Q14515	50	50	2	ENSG00000152583
Q14520	50	50	1	ENSG00000148702
Q14532	50	50	1	ENSG00000108759
Q14585	50	50	3	ENSG00000251247
Q14695	50	50	0
Q15111	50	50	0	ENSG00000115896
Q15256	50	50	4	ENSG00000153233
Q15323	50	50	0	ENSG00000094796;ENSG00000262993
Q15542	50	50	1	ENSG00000148835
Q15700	50	50	3	ENSG00000150672
Q15760	50	50	1	ENSG00000183150
Q15772	50	50	4	ENSG00000072195
Q15772	50	50	4	ENSG00000072195
Q15772	50	50	4	ENSG00000072195
Q15849	50	50	2	ENSG00000132874
Q15937	50	50	0	ENSG00000196152
Q16281	50	50	3	ENSG00000144191
Q16322	50	50	3	ENSG00000143105
Q16363	50	50	0	ENSG00000112769
Q16650	50	50	2	ENSG00000136535
Q16799	50	50	1	ENSG00000139970
Q1MX18	50	50	1	ENSG00000188487
Q1ZZU3	50	50	1
Q2KJY2	50	50	5	ENSG00000162849
Q2M1K9	50	50	3	ENSG00000102935
Q2M2I5	50	50	0	ENSG00000167916
Q2M3C6	50	50	1	ENSG00000169758
Q2WGJ9	50	50	8	ENSG00000214814
Q32M92	50	50	4
Q33E94	50	50	2	ENSG00000111783
Q3C1V0	50	50	1	ENSG00000214782
Q3KNS1	50	50	5	ENSG00000276595
Q3KNW1	50	50	2	ENSG00000185669
Q3KR37	50	50	4	ENSG00000023171
Q3LHN0	50	50	0	ENSG00000232263
Q3LI59	50	50	0	ENSG00000187026
Q3MJ16	50	50	0	ENSG00000188089
Q3MJ40	50	50	3
Q3SY84	50	50	3	ENSG00000139648
Q3ZCN5	50	50	3	ENSG00000165899
Q460N3	50	50	0	ENSG00000173200
Q494R0	50	50	1
Q495M3	50	50	7	ENSG00000186335
Q496Y0	50	50	1	ENSG00000175556
Q49AA0	50	50	4	ENSG00000187815
Q4G0P3	50	50	3	ENSG00000157423;ENSG00000283022
Q4G0S4	50	50	1	ENSG00000186684
Q4G163	50	50	4	ENSG00000156509
Q4KMX7	50	50	0
Q4LDE5	50	50	0	ENSG00000165124
Q4V348	50	50	6
Q4VX62	50	50	0
Q4ZJI4	50	50	4	ENSG00000164037
Q53QZ3	50	50	4	ENSG00000075884
Q56UN5	50	50	2	ENSG00000176601
Q5CZC0	50	50	4	ENSG00000188738
Q5CZC0	50	50	4	ENSG00000188738
Q5CZC0	50	50	4	ENSG00000188738
Q5CZC0	50	50	4	ENSG00000188738
Q5CZC0	50	50	4	ENSG00000188738
Q5CZC0	50	50	4	ENSG00000188738
Q5CZC0	50	50	4	ENSG00000188738
Q5CZC0	50	50	4	ENSG00000188738
Q5GH73	50	50	1	ENSG00000171044
Q5GH76	50	50	4	ENSG00000206579
Q5H9F3	50	50	0	ENSG00000085185
Q5JNZ3	50	50	1	ENSG00000197935;ENSG00000169260;ENSG00000225351;ENSG00000235178;ENSG00000235589;ENSG00000223687;ENSG00000233831
Q5JWF2	50	50	0	ENSG00000087460
Q5JY77	50	50	4	ENSG00000198932
Q5KSL6	50	50	0	ENSG00000274588
Q5M9N0	50	50	1	ENSG00000163749
Q5QGS0	50	50	3	ENSG00000050030
Q5R372	50	50	4	ENSG00000152061
Q5SNV9	50	50	0	ENSG00000215910
Q5SQS8	50	50	4	ENSG00000183559
Q5SVZ6	50	50	4	ENSG00000197056
Q5SY85	50	50	0
Q5SYE7	50	50	3	ENSG00000135540
Q5SZL2	50	50	0	ENSG00000111860
Q5T0J3	50	50	3
Q5T1B0	50	50	9	ENSG00000162779
Q5T1H1	50	50	2	ENSG00000188107
Q5T1H1	50	50	2	ENSG00000188107
Q5T1H1	50	50	2	ENSG00000188107
Q5T1H1	50	50	2	ENSG00000188107
Q5T1H1	50	50	2	ENSG00000188107
Q5T1J6	50	50	2
Q5T619	50	50	1	ENSG00000179930
Q5T750	50	50	3	ENSG00000198854
Q5T7M4	50	50	0	ENSG00000184163
Q5TAX3	50	50	8	ENSG00000134744
Q5TBA9	50	50	4	ENSG00000073910
Q5TDP6	50	50	3	ENSG00000146166
Q5TEC3	50	50	3	ENSG00000143067
Q5U651	50	50	5	ENSG00000105538
Q5VT03	50	50	0	ENSG00000214562
Q5VTH9	50	50	4	ENSG00000152763
Q5VUJ5	50	50	0
Q5VV17	50	50	1	ENSG00000165312
Q5VV52	50	50	1	ENSG00000164011
Q5VVS0	50	50	3
Q5VW22	50	50	0	ENSG00000204149
Q5W5W9	50	50	0	ENSG00000182698
Q674R7	50	50	0	ENSG00000181652
Q685J3	50	50	0	ENSG00000169876
Q685J3	50	50	0	ENSG00000169876
Q685J3	50	50	0	ENSG00000169876
Q685J3	50	50	0	ENSG00000169876
Q685J3	50	50	0	ENSG00000169876
Q68BL8	50	50	1	ENSG00000162745
Q68CQ1	50	50	1	ENSG00000184313
Q68DA7	50	50	4	ENSG00000248905
Q68DN1	50	50	2
Q68DQ2	50	50	1	ENSG00000080200
Q68DQ2	50	50	1	ENSG00000080200
Q68DQ2	50	50	1	ENSG00000080200
Q68DQ2	50	50	1	ENSG00000080200
Q68DQ2	50	50	1	ENSG00000080200
Q68DQ2	50	50	1	ENSG00000080200
Q6A163	50	50	1	ENSG00000196859;ENSG00000262164
Q6DN14	50	50	2	ENSG00000175471
Q6IWH7	50	50	0	ENSG00000146205
Q6JHZ5	50	50	4	ENSG00000277005
Q6L8G5	50	50	1	ENSG00000204572
Q6L8H1	50	50	0	ENSG00000278620
Q6L8H2	50	50	1	ENSG00000196224;ENSG00000275920;ENSG00000281191
Q6MZW2	50	50	1	ENSG00000053108
Q6N022	50	50	5	ENSG00000149256
Q6NUT2	50	50	5	ENSG00000177990
Q6P179	50	50	1	ENSG00000164308
Q6P1M9	50	50	3	ENSG00000125962
Q6PF05	50	50	0	ENSG00000205838
Q6PI77	50	50	11	ENSG00000198908
Q6PIL6	50	50	4	ENSG00000185774
Q6PJ61	50	50	1	ENSG00000177051
Q6PRD1	50	50	1	ENSG00000276469
Q6PRD7	50	50	1	ENSG00000205923
Q6QN14	50	50	2
Q6R6M4	50	50	2	ENSG00000223443
Q6S545	50	50	5	ENSG00000198062
Q6S5H5	50	50	5	ENSG00000187537
Q6S5L8	50	50	1	ENSG00000185634
Q6S8J3	50	50	5	ENSG00000188219
Q6SJ93	50	50	5	ENSG00000189057
Q6UB98	50	50	9	ENSG00000101745
Q6URK8	50	50	2	ENSG00000159648
Q6UX06	50	50	0	ENSG00000102837
Q6UXH9	50	50	0	ENSG00000149090
Q6UXP9	50	50	1
Q6UXU0	50	50	0
Q6UXV3	50	50	0
Q6UXY8	50	50	1	ENSG00000103534
Q6UY01	50	50	6	ENSG00000114248
Q6V1P9	50	50	2	ENSG00000197410;ENSG00000284227
Q6XCG6	50	50	0
Q6XXX2	50	50	2
Q6ZMJ2	50	50	3	ENSG00000168079
Q6ZMT9	50	50	1	ENSG00000197057
Q6ZMY3	50	50	0	ENSG00000134668
Q6ZN03	50	50	2
Q6ZN16	50	50	0	ENSG00000180815
Q6ZN19	50	50	4	ENSG00000197608
Q6ZN28	50	50	3	ENSG00000183742
Q6ZN57	50	50	1	ENSG00000198939
Q6ZNB6	50	50	1	ENSG00000170448
Q6ZNH5	50	50	1	ENSG00000174586
Q6ZNL6	50	50	3	ENSG00000154783
Q6ZP01	50	50	6	ENSG00000177483
Q6ZPB5	50	50	1
Q6ZR03	50	50	0
Q6ZRI0	50	50	1	ENSG00000188162
Q6ZRI0	50	50	1	ENSG00000188162
Q6ZRP5	50	50	3
Q6ZRS2	50	50	0	ENSG00000080603
Q6ZRS2	50	50	0	ENSG00000080603
Q6ZRS2	50	50	0	ENSG00000080603
Q6ZRS2	50	50	0	ENSG00000080603
Q6ZRU5	50	50	1
Q6ZRV3	50	50	1
Q6ZRX8	50	50	1
Q6ZS46	50	50	2
Q6ZS49	50	50	2
Q6ZS62	50	50	0
Q6ZS92	50	50	0
Q6ZSK4	50	50	2
Q6ZT77	50	50	3
Q6ZTY9	50	50	3
Q6ZU64	50	50	7	ENSG00000181378
Q6ZUA9	50	50	2
Q6ZUL3	50	50	5
Q6ZUX3	50	50	1	ENSG00000189350
Q6ZV56	50	50	NA
Q6ZVL6	50	50	1	ENSG00000110427
Q6ZVL8	50	50	1
Q6ZVQ6	50	50	1
Q6ZVT0	50	50	2	ENSG00000162571
Q6ZVU0	50	50	3
Q6ZWE6	50	50	1	ENSG00000178385;ENSG00000285005
Q6ZWJ8	50	50	0	ENSG00000135253
Q701N2	50	50	0	ENSG00000185940;ENSG00000277291
Q70EK9	50	50	3	ENSG00000247746
Q71RC1	50	50	1	ENSG00000267954
Q71RG6	50	50	0
Q75N90	50	50	0	ENSG00000142449
Q75V66	50	50	3	ENSG00000171714
Q76LX8	50	50	0	ENSG00000160323;ENSG00000281244
Q76N89	50	50	2	ENSG00000002746
Q7L1I2	50	50	1	ENSG00000185518
Q7L591	50	50	2	ENSG00000146094
Q7RTM1	50	50	0	ENSG00000163982
Q7RTS5	50	50	1
Q7RTS7	50	50	3	ENSG00000170484
Q7RTU9	50	50	1	ENSG00000242866
Q7RTX7	50	50	1	ENSG00000188782
Q7RTY8	50	50	4	ENSG00000176040
Q7RTZ2	50	50	2	ENSG00000230549
Q7Z2D5	50	50	0	ENSG00000117600
Q7Z2X4	50	50	4	ENSG00000153823
Q7Z3H0	50	50	1	ENSG00000167612
Q7Z3I7	50	50	7	ENSG00000180938
Q7Z3S7	50	50	1	ENSG00000151062;ENSG00000284953
Q7Z3Y7	50	50	0	ENSG00000173908
Q7Z3Y8	50	50	0	ENSG00000171446
Q7Z3Y9	50	50	0	ENSG00000186393
Q7Z3Z0	50	50	0	ENSG00000204897
Q7Z3Z3	50	50	0	ENSG00000184571
Q7Z3Z4	50	50	1	ENSG00000134627
Q7Z407	50	50	9	ENSG00000164796
Q7Z407	50	50	9	ENSG00000164796
Q7Z410	50	50	1	ENSG00000178297
Q7Z494	50	50	2	ENSG00000113971
Q7Z591	50	50	2	ENSG00000106948
Q7Z5A4	50	50	0
Q7Z5L7	50	50	0	ENSG00000174348
Q7Z5P9	50	50	4
Q7Z5P9	50	50	4
Q7Z5P9	50	50	4
Q7Z5P9	50	50	4
Q7Z5P9	50	50	4
Q7Z5P9	50	50	4
Q7Z5P9	50	50	4
Q7Z5P9	50	50	4
Q7Z5P9	50	50	4
Q7Z5P9	50	50	4
Q7Z5P9	50	50	4
Q7Z5P9	50	50	4
Q7Z5P9	50	50	4
Q7Z5P9	50	50	4
Q7Z5P9	50	50	4
Q7Z5P9	50	50	4
Q7Z6J4	50	50	2	ENSG00000146192
Q7Z6R9	50	50	0	ENSG00000008197
Q7Z794	50	50	0	ENSG00000189182
Q7Z7G0	50	50	5	ENSG00000154175
Q7Z7L9	50	50	0	ENSG00000176371
Q86TA4	50	50	3
Q86UD4	50	50	1	ENSG00000181894
Q86UE3	50	50	0	ENSG00000187187;ENSG00000281526
Q86UG4	50	50	6	ENSG00000205359
Q86UK5	50	50	0	ENSG00000173040
Q86UP3	50	50	2	ENSG00000091656
Q86UP3	50	50	2	ENSG00000091656
Q86UT5	50	50	0	ENSG00000172367
Q86UT6	50	50	0	ENSG00000160703
Q86VE3	50	50	1	ENSG00000184788
Q86VK4	50	50	2	ENSG00000119725
Q86WZ0	50	50	5	ENSG00000187105
Q86XS5	50	50	2	ENSG00000187151
Q86YF9	50	50	1	ENSG00000134874
Q86YH2	50	50	3	ENSG00000275004
Q86YR6	50	50	5	ENSG00000166351
Q86YV6	50	50	6	ENSG00000145949
Q86YZ3	50	50	4	ENSG00000197915
Q86YZ3	50	50	4	ENSG00000197915
Q86Z14	50	50	1	ENSG00000134962
Q8HWS3	50	50	2	ENSG00000185002
Q8IUC2	50	50	0	ENSG00000183640
Q8IUC3	50	50	0	ENSG00000274749
Q8IVB5	50	50	0	ENSG00000271601
Q8IVF1	50	50	5	ENSG00000184923
Q8IVF4	50	50	3	ENSG00000197653
Q8IVF5	50	50	5	ENSG00000146426
Q8IVH4	50	50	1	ENSG00000151611
Q8IVL0	50	50	2	ENSG00000067798
Q8IW93	50	50	1	ENSG00000142632
Q8IWI9	50	50	3	ENSG00000174197
Q8IWI9	50	50	3	ENSG00000174197
Q8IWI9	50	50	3	ENSG00000174197
Q8IWZ3	50	50	0	ENSG00000131503
Q8IWZ5	50	50	2	ENSG00000155890
Q8IXR5	50	50	0	ENSG00000168754
Q8IY50	50	50	3	ENSG00000183780
Q8IY85	50	50	6	ENSG00000178852
Q8IYA2	50	50	3
Q8IYB4	50	50	7	ENSG00000114757
Q8IYD8	50	50	1	ENSG00000187790
Q8IZ20	50	50	1	ENSG00000176083
Q8IZ73	50	50	1	ENSG00000166133
Q8IZF2	50	50	3	ENSG00000069122
Q8IZF5	50	50	0	ENSG00000173567
Q8IZF6	50	50	5	ENSG00000156920
Q8IZF6	50	50	5	ENSG00000156920
Q8IZF6	50	50	5	ENSG00000156920
Q8IZF6	50	50	5	ENSG00000156920
Q8IZF6	50	50	5	ENSG00000156920
Q8IZF6	50	50	5	ENSG00000156920
Q8IZF6	50	50	5	ENSG00000156920
Q8IZF6	50	50	5	ENSG00000156920
Q8IZF6	50	50	5	ENSG00000156920
Q8IZF7	50	50	2
Q8IZJ4	50	50	1	ENSG00000159496
Q8IZW8	50	50	0	ENSG00000131746
Q8N0V1	50	50	2
Q8N0X2	50	50	0	ENSG00000144451
Q8N130	50	50	2	ENSG00000198569
Q8N143	50	50	0	ENSG00000161940
Q8N159	50	50	0	ENSG00000161653
Q8N1D0	50	50	4	ENSG00000254827
Q8N1L1	50	50	0
Q8N1N5	50	50	NA
Q8N1P7	50	50	3	ENSG00000176092
Q8N1Y9	50	50	2
Q8N2A0	50	50	2
Q8N2B8	50	50	3
Q8N2C7	50	50	4	ENSG00000144406
Q8N2C7	50	50	4	ENSG00000144406
Q8N2C7	50	50	4	ENSG00000144406
Q8N2C9	50	50	1
Q8N2I2	50	50	1	ENSG00000177873
Q8N307	50	50	0	ENSG00000176945;ENSG00000278114;ENSG00000276583;ENSG00000275501
Q8N3U1	50	50	0
Q8N4M7	50	50	1
Q8N4U5	50	50	2	ENSG00000166046
Q8N4V2	50	50	1	ENSG00000166111
Q8N5H7	50	50	7	ENSG00000095370
Q8N5V2	50	50	6	ENSG00000066248
Q8N616	50	50	0
Q8N6C7	50	50	2
Q8N6Y2	50	50	3	ENSG00000128606
Q8N720	50	50	0	ENSG00000197343
Q8N7M2	50	50	0	ENSG00000167637
Q8N7U6	50	50	4	ENSG00000163576
Q8N7Y1	50	50	3
Q8N7Z5	50	50	2	ENSG00000145700
Q8N814	50	50	3
Q8N816	50	50	0
Q8N841	50	50	3	ENSG00000170703
Q8N895	50	50	6	ENSG00000178175
Q8N8E2	50	50	3	ENSG00000163795
Q8N8I6	50	50	1
Q8N8R5	50	50	0	ENSG00000178074
Q8N9F0	50	50	3	ENSG00000185818
Q8N9L7	50	50	3
Q8N9P6	50	50	0
Q8N9V6	50	50	2	ENSG00000144031
Q8N9Z9	50	50	2	ENSG00000152936
Q8NA54	50	50	1	ENSG00000164675
Q8NA61	50	50	1	ENSG00000174015
Q8NA69	50	50	1	ENSG00000198723
Q8NA97	50	50	3
Q8NAA6	50	50	3
Q8NAJ2	50	50	1
Q8NAM6	50	50	0	ENSG00000180532
Q8NBF4	50	50	0
Q8NBH2	50	50	3	ENSG00000174611
Q8NBZ9	50	50	6
Q8NCQ5	50	50	2	ENSG00000141665
Q8NDH2	50	50	3	ENSG00000175820
Q8NDY4	50	50	1
Q8NDZ0	50	50	0	ENSG00000177324
Q8NEC5	50	50	1	ENSG00000175294
Q8NEM8	50	50	2	ENSG00000146856
Q8NER1	50	50	5	ENSG00000196689
Q8NET4	50	50	1	ENSG00000243978
Q8NFP9	50	50	1	ENSG00000172915
Q8NFP9	50	50	1	ENSG00000172915
Q8NFP9	50	50	1	ENSG00000172915
Q8NFP9	50	50	1	ENSG00000172915
Q8NFU7	50	50	11	ENSG00000138336
Q8NFV5	50	50	4	ENSG00000136206
Q8NFZ6	50	50	1	ENSG00000196131
Q8NGC0	50	50	1	ENSG00000169327
Q8NHH1	50	50	0	ENSG00000175764
Q8NHY0	50	50	1	ENSG00000167080
Q8NI28	50	50	0
Q8NI36	50	50	2
Q8NI51	50	50	6	ENSG00000124092
Q8TAA1	50	50	4	ENSG00000173464
Q8TB92	50	50	1	ENSG00000146151
Q8TBE7	50	50	5	ENSG00000168917
Q8TBJ5	50	50	2	ENSG00000153266
Q8TBR5	50	50	1
Q8TBY9	50	50	3	ENSG00000158023
Q8TBZ2	50	50	7	ENSG00000136449
Q8TBZ5	50	50	4	ENSG00000196653;ENSG00000281448
Q8TC36	50	50	0	ENSG00000167098
Q8TC59	50	50	1	ENSG00000197181
Q8TC99	50	50	5	ENSG00000073598
Q8TD57	50	50	2	ENSG00000158486
Q8TD90	50	50	0	ENSG00000186675
Q8TD91	50	50	4	ENSG00000165509
Q8TDD2	50	50	4	ENSG00000170374
Q8TDI7	50	50	6	ENSG00000149488
Q8TDI8	50	50	7	ENSG00000165091
Q8TDN2	50	50	1	ENSG00000168263
Q8TDS5	50	50	1	ENSG00000162881
Q8TDX9	50	50	1	ENSG00000158683
Q8TDX9	50	50	1	ENSG00000158683
Q8TDX9	50	50	1	ENSG00000158683
Q8TDX9	50	50	1	ENSG00000158683
Q8TE57	50	50	1	ENSG00000145536
Q8TE60	50	50	1	ENSG00000140873
Q8TEV8	50	50	1
Q8TF27	50	50	2
Q8TF71	50	50	1	ENSG00000112394
Q8TF76	50	50	0	ENSG00000177602
Q8WTU2	50	50	2	ENSG00000146700
Q8WU49	50	50	0	ENSG00000170279
Q8WWL7	50	50	6	ENSG00000147082
Q8WWQ2	50	50	0	ENSG00000172987
Q8WWW0	50	50	0	ENSG00000266094
Q8WXB4	50	50	0	ENSG00000166704
Q8WXI7	50	50	3	ENSG00000181143
Q8WXI7	50	50	3	ENSG00000181143
Q8WXI7	50	50	3	ENSG00000181143
Q8WXI7	50	50	3	ENSG00000181143
Q8WXI7	50	50	3	ENSG00000181143
Q8WXI7	50	50	3	ENSG00000181143
Q8WXI7	50	50	3	ENSG00000181143
Q8WXI7	50	50	3	ENSG00000181143
Q8WXI7	50	50	3	ENSG00000181143
Q8WXI7	50	50	3	ENSG00000181143
Q8WXI7	50	50	3	ENSG00000181143
Q8WXI7	50	50	3	ENSG00000181143
Q8WXI7	50	50	3	ENSG00000181143
Q8WXI7	50	50	3	ENSG00000181143
Q8WXI7	50	50	3	ENSG00000181143
Q8WXI7	50	50	3	ENSG00000181143
Q8WXI7	50	50	3	ENSG00000181143
Q8WXI7	50	50	3	ENSG00000181143
Q8WXI7	50	50	3	ENSG00000181143
Q8WXI7	50	50	3	ENSG00000181143
Q8WXI7	50	50	3	ENSG00000181143
Q8WXI7	50	50	3	ENSG00000181143
Q8WXI7	50	50	3	ENSG00000181143
Q8WXI7	50	50	3	ENSG00000181143
Q8WXI7	50	50	3	ENSG00000181143
Q8WXI7	50	50	3	ENSG00000181143
Q8WXI7	50	50	3	ENSG00000181143
Q8WXI7	50	50	3	ENSG00000181143
Q8WXI7	50	50	3	ENSG00000181143
Q8WXI7	50	50	3	ENSG00000181143
Q8WXI7	50	50	3	ENSG00000181143
Q8WXI7	50	50	3	ENSG00000181143
Q8WXI7	50	50	3	ENSG00000181143
Q8WXI7	50	50	3	ENSG00000181143
Q8WXI7	50	50	3	ENSG00000181143
Q8WXI7	50	50	3	ENSG00000181143
Q8WXI7	50	50	3	ENSG00000181143
Q8WXI7	50	50	3	ENSG00000181143
Q8WXI7	50	50	3	ENSG00000181143
Q8WXI7	50	50	3	ENSG00000181143
Q8WXQ3	50	50	4
Q8WXX0	50	50	10	ENSG00000118997
Q8WY21	50	50	1	ENSG00000108018
Q8WY50	50	50	3
Q8WZ69	50	50	5
Q92565	50	50	2	ENSG00000136237
Q92731	50	50	1	ENSG00000140009
Q92752	50	50	2	ENSG00000116147
Q92952	50	50	1	ENSG00000105642
Q93015	50	50	1	ENSG00000243477
Q969I6	50	50	2	ENSG00000139209
Q96BR6	50	50	1	ENSG00000188295
Q96BV0	50	50	5	ENSG00000196456
Q96C34	50	50	2	ENSG00000198863
Q96EG3	50	50	4	ENSG00000152475
Q96EP9	50	50	0	ENSG00000145248
Q96EZ4	50	50	0	ENSG00000172927
Q96G42	50	50	0	ENSG00000130487
Q96I27	50	50	6	ENSG00000257591
Q96J66	50	50	2	ENSG00000121270
Q96J94	50	50	0	ENSG00000125207;ENSG00000275051
Q96JG9	50	50	1	ENSG00000225614
Q96JG9	50	50	1	ENSG00000225614
Q96JG9	50	50	1	ENSG00000225614
Q96JG9	50	50	1	ENSG00000225614
Q96JG9	50	50	1	ENSG00000225614
Q96JG9	50	50	1	ENSG00000225614
Q96JP2	50	50	1
Q96L96	50	50	0	ENSG00000136383
Q96LB8	50	50	3	ENSG00000163218
Q96LL4	50	50	2	ENSG00000164743
Q96LM1	50	50	6
Q96LM9	50	50	0	ENSG00000125975
Q96LP2	50	50	9	ENSG00000153347
Q96LW2	50	50	2	ENSG00000167524
Q96LX8	50	50	2	ENSG00000167981
Q96LZ7	50	50	4	ENSG00000115841
Q96M15	50	50	5
Q96M29	50	50	2	ENSG00000153060
Q96M42	50	50	0
Q96M69	50	50	3	ENSG00000155530
Q96M78	50	50	0
Q96M85	50	50	1
Q96M86	50	50	4	ENSG00000179532
Q96M86	50	50	4	ENSG00000179532
Q96M93	50	50	4	ENSG00000164113
Q96MC4	50	50	1	ENSG00000178404
Q96MC9	50	50	0
Q96MM3	50	50	6	ENSG00000179059
Q96MS0	50	50	1	ENSG00000154134
Q96MT0	50	50	0
Q96MT4	50	50	2
Q96MT7	50	50	6	ENSG00000206530
Q96MU5	50	50	2
Q96MZ4	50	50	1
Q96N23	50	50	1	ENSG00000188596
Q96N38	50	50	4
Q96NJ1	50	50	0
Q96NS8	50	50	3
Q96NY7	50	50	0	ENSG00000159212
Q96P26	50	50	7	ENSG00000185013
Q96PX9	50	50	0	ENSG00000153404
Q96PZ2	50	50	6	ENSG00000166801
Q96Q06	50	50	0	ENSG00000167676
Q96Q27	50	50	1	ENSG00000100628;ENSG00000278693
Q96Q40	50	50	3	ENSG00000138395
Q96Q91	50	50	2	ENSG00000113073
Q96QE2	50	50	2	ENSG00000151229
Q96QE3	50	50	8	ENSG00000176208
Q96QE5	50	50	4	ENSG00000172171
Q96RI1	50	50	2	ENSG00000012504
Q96S07	50	50	1
Q96SM3	50	50	1	ENSG00000088882
Q96T25	50	50	3	ENSG00000139800
Q99102	50	50	2	ENSG00000145113
Q99551	50	50	2	ENSG00000127989
Q99592	50	50	0	ENSG00000179456
Q99624	50	50	3	ENSG00000188338
Q99698	50	50	0	ENSG00000143669
Q99698	50	50	0	ENSG00000143669
Q99705	50	50	2	ENSG00000128285
Q99726	50	50	2	ENSG00000115194
Q99767	50	50	1	ENSG00000034053;ENSG00000276495
Q99983	50	50	1	ENSG00000127083
Q9BQ66	50	50	0	ENSG00000213416;ENSG00000263236
Q9BQI7	50	50	1	ENSG00000146005
Q9BR46	50	50	3
Q9BRI3	50	50	2	ENSG00000158014
Q9BRP0	50	50	3	ENSG00000125850
Q9BRP9	50	50	1
Q9BWV7	50	50	0	ENSG00000120440
Q9BX66	50	50	5	ENSG00000095637
Q9BXB7	50	50	5	ENSG00000144962
Q9BXP8	50	50	3	ENSG00000116183
Q9BXT4	50	50	4	ENSG00000095627
Q9BXT5	50	50	4	ENSG00000133863
Q9BXT5	50	50	4	ENSG00000133863
Q9BXT5	50	50	4	ENSG00000133863
Q9BXT5	50	50	4	ENSG00000133863
Q9BXT5	50	50	4	ENSG00000133863
Q9BXT5	50	50	4	ENSG00000133863
Q9BY07	50	50	7	ENSG00000188687
Q9BY79	50	50	2	ENSG00000235718
Q9BYH1	50	50	0	ENSG00000100095
Q9BYH8	50	50	1	ENSG00000144802
Q9BYP7	50	50	3	ENSG00000196632
Q9BYQ3	50	50	0	ENSG00000204873;ENSG00000262749
Q9BYQ5	50	50	0	ENSG00000198090
Q9BYQ9	50	50	0	ENSG00000204880
Q9BYR0	50	50	0	ENSG00000240871
Q9BYR6	50	50	1	ENSG00000212899;ENSG00000263101
Q9BYR7	50	50	1	ENSG00000212900;ENSG00000263296
Q9BYR8	50	50	1	ENSG00000212901;ENSG00000262068
Q9BYR9	50	50	0	ENSG00000213417;ENSG00000263091
Q9BYS1	50	50	0	ENSG00000221852;ENSG00000261862
Q9BYT5	50	50	0	ENSG00000214518
Q9BYT9	50	50	6	ENSG00000134343
Q9BYU5	50	50	0	ENSG00000212725;ENSG00000261852
Q9BZ19	50	50	0	ENSG00000124227
Q9BZ71	50	50	2	ENSG00000091622
Q9BZJ6	50	50	0	ENSG00000112218
Q9BZQ2	50	50	3	ENSG00000157060
Q9C075	50	50	0	ENSG00000108244;ENSG00000263309
Q9C0A1	50	50	1	ENSG00000136367
Q9C0B2	50	50	1	ENSG00000142609
Q9C0B6	50	50	0	ENSG00000198797
Q9C0D4	50	50	2	ENSG00000178163
Q9C0D7	50	50	3	ENSG00000149289
Q9C0G6	50	50	2	ENSG00000115423
Q9GZL8	50	50	0
Q9GZN6	50	50	2	ENSG00000063127
Q9GZV8	50	50	1	ENSG00000147596
Q9GZY0	50	50	5	ENSG00000269437;ENSG00000269405
Q9H0A3	50	50	3
[truncated: 21,392 more rows]
