# Supplementary material
Source: HighWire-hosted journal article supplement (doi:10.1101/rna.079755.123)
Supplement: Supplemental_Table_S4.xlsx [file Supplemental_Table_S4.xlsx]

## Sheet: S_cerevisiae
Analysis Type:	PANTHER Overrepresentation Test (Released 20220712)
Annotation Version and Release Date:	GO Ontology database DOI: 10.5281/zenodo.6799722 Released 2022-07-01
Analyzed List:	Client Text Box Input (Saccharomyces cerevisiae)
Reference List:	Saccharomyces cerevisiae (all genes in database)
Test Type:	FISHER
Correction:	FDR
GO biological process complete	Saccharomyces cerevisiae - REFLIST (6050)	Client Text Box Input (1022)	Client Text Box Input (expected)	Client Text Box Input (over/under)	Client Text Box Input (fold Enrichment)	Client Text Box Input (raw P-value)	Client Text Box Input (FDR)
positive regulation of histone methylation (GO:0031062)	6	6	1.01	+	5.92	3.80E-03	4.96E-02
regulation of histone ubiquitination (GO:0033182)	8	8	1.35	+	5.92	8.08E-04	1.47E-02
regulation of histone H2B ubiquitination (GO:2001166)	7	7	1.18	+	5.92	1.75E-03	2.75E-02
regulation of histone methylation (GO:0031060)	10	9	1.69	+	5.33	6.25E-04	1.20E-02
NLS-bearing protein import into nucleus (GO:0006607)	17	14	2.87	+	4.88	3.79E-05	1.02E-03
positive regulation of transcription elongation by RNA polymerase I (GO:2001209)	10	8	1.69	+	4.74	2.10E-03	3.17E-02
regulation of transcription elongation by RNA polymerase I (GO:2001207)	10	8	1.69	+	4.74	2.10E-03	3.16E-02
regulation of cytoplasmic mRNA processing body assembly (GO:0010603)	11	8	1.86	+	4.31	3.18E-03	4.32E-02
negative regulation of silent mating-type cassette heterochromatin formation (GO:0061186)	11	8	1.86	+	4.31	3.18E-03	4.31E-02
negative regulation of heterochromatin organization (GO:0120262)	14	10	2.36	+	4.23	1.08E-03	1.90E-02
negative regulation of heterochromatin formation (GO:0031452)	14	10	2.36	+	4.23	1.08E-03	1.89E-02
regulation of silent mating-type cassette heterochromatin formation (GO:0090054)	13	9	2.20	+	4.10	2.24E-03	3.30E-02
positive regulation of transcription by RNA polymerase I (GO:0045943)	24	16	4.05	+	3.95	6.61E-05	1.64E-03
regulation of heterochromatin organization (GO:0120261)	17	11	2.87	+	3.83	1.10E-03	1.91E-02
regulation of heterochromatin formation (GO:0031445)	17	11	2.87	+	3.83	1.10E-03	1.90E-02
CUT metabolic process (GO:0071043)	14	9	2.36	+	3.81	3.21E-03	4.35E-02
CUT catabolic process (GO:0071034)	14	9	2.36	+	3.81	3.21E-03	4.34E-02
negative regulation of chromatin organization (GO:1905268)	16	10	2.70	+	3.70	2.23E-03	3.31E-02
nucleosome assembly (GO:0006334)	16	10	2.70	+	3.70	2.23E-03	3.30E-02
phosphorylation of RNA polymerase II C-terminal domain (GO:0070816)	16	10	2.70	+	3.70	2.23E-03	3.29E-02
positive regulation of DNA-templated transcription, elongation (GO:0032786)	53	33	8.95	+	3.69	3.35E-08	1.52E-06
positive regulation of histone modification (GO:0031058)	18	11	3.04	+	3.62	1.54E-03	2.48E-02
regulation of histone modification (GO:0031056)	28	17	4.73	+	3.59	9.23E-05	2.21E-03
regulation of DNA-templated transcription elongation (GO:0032784)	56	34	9.46	+	3.59	3.28E-08	1.51E-06
poly(A)+ mRNA export from nucleus (GO:0016973)	38	23	6.42	+	3.58	5.75E-06	1.77E-04
maturation of LSU-rRNA from tricistronic rRNA transcript (SSU-rRNA, 5.8S rRNA, LSU-rRNA) (GO:0000463)	53	32	8.95	+	3.57	9.17E-08	3.80E-06
positive regulation of transcription elongation by RNA polymerase II (GO:0032968)	45	27	7.60	+	3.55	1.02E-06	3.56E-05
mRNA export from nucleus (GO:0006406)	65	39	10.98	+	3.55	4.09E-09	2.11E-07
regulation of transcription by RNA polymerase I (GO:0006356)	37	22	6.25	+	3.52	1.13E-05	3.26E-04
ribosomal large subunit export from nucleus (GO:0000055)	32	19	5.41	+	3.51	4.52E-05	1.21E-03
nuclear-transcribed mRNA catabolic process, 3'-5' exonucleolytic nonsense-mediated decay (GO:0070478)	17	10	2.87	+	3.48	3.09E-03	4.21E-02
regulation of transcription elongation by RNA polymerase II (GO:0034243)	48	28	8.11	+	3.45	9.76E-07	3.45E-05
spliceosomal conformational changes to generate catalytic conformation (GO:0000393)	21	12	3.55	+	3.38	1.46E-03	2.38E-02
maturation of LSU-rRNA (GO:0000470)	68	38	11.49	+	3.31	2.72E-08	1.26E-06
regulation of chromatin organization (GO:1902275)	22	12	3.72	+	3.23	1.97E-03	3.03E-02
mRNA 3'-end processing (GO:0031124)	39	21	6.59	+	3.19	5.37E-05	1.38E-03
spliceosomal complex assembly (GO:0000245)	28	15	4.73	+	3.17	6.44E-04	1.22E-02
nuclear mRNA surveillance (GO:0071028)	28	15	4.73	+	3.17	6.44E-04	1.21E-02
sno(s)RNA 3'-end processing (GO:0031126)	32	17	5.41	+	3.14	3.08E-04	6.53E-03
nucleosome organization (GO:0034728)	49	26	8.28	+	3.14	8.70E-06	2.59E-04
positive regulation of protein-containing complex assembly (GO:0031334)	34	18	5.74	+	3.13	2.13E-04	4.68E-03
nucleotide-excision repair (GO:0006289)	57	30	9.63	+	3.12	3.19E-06	1.03E-04
nuclear-transcribed mRNA catabolic process, exonucleolytic (GO:0000291)	21	11	3.55	+	3.10	3.81E-03	4.96E-02
regulation of protein dephosphorylation (GO:0035304)	21	11	3.55	+	3.10	3.81E-03	4.95E-02
regulation of organelle assembly (GO:1902115)	33	17	5.57	+	3.05	4.04E-04	8.14E-03
transcription elongation by RNA polymerase II promoter (GO:0006368)	65	33	10.98	+	3.01	1.37E-06	4.68E-05
small regulatory ncRNA 3'-end processing (GO:0043628)	42	21	7.09	+	2.96	1.72E-04	3.87E-03
ribosomal subunit export from nucleus (GO:0000054)	52	26	8.78	+	2.96	2.42E-05	6.71E-04
regulation of microtubule-based process (GO:0032886)	26	13	4.39	+	2.96	2.34E-03	3.41E-02
DNA-templated DNA replication maintenance of fidelity (GO:0045005)	26	13	4.39	+	2.96	2.34E-03	3.40E-02
snRNA metabolic process (GO:0016073)	32	16	5.41	+	2.96	7.62E-04	1.41E-02
mRNA transport (GO:0051028)	98	49	16.55	+	2.96	6.67E-09	3.37E-07
DNA-templated transcription elongation (GO:0006354)	73	36	12.33	+	2.92	6.92E-07	2.53E-05
ribosome localization (GO:0033750)	53	26	8.95	+	2.90	2.91E-05	7.99E-04
ribosomal large subunit biogenesis (GO:0042273)	129	63	21.79	+	2.89	9.24E-11	6.49E-09
ribosomal large subunit assembly (GO:0000027)	41	20	6.93	+	2.89	2.95E-04	6.31E-03
nuclear RNA surveillance (GO:0071027)	33	16	5.57	+	2.87	1.45E-03	2.36E-02
protein-containing complex localization (GO:0031503)	93	45	15.71	+	2.86	4.96E-08	2.20E-06
RNA export from nucleus (GO:0006405)	94	45	15.88	+	2.83	5.96E-08	2.60E-06
RNA 3'-end processing (GO:0031123)	76	36	12.84	+	2.80	1.82E-06	6.04E-05
nuclear export (GO:0051168)	131	62	22.13	+	2.80	2.47E-10	1.60E-08
rRNA transcription (GO:0009303)	36	17	6.08	+	2.80	1.11E-03	1.90E-02
positive regulation of supramolecular fiber organization (GO:1902905)	30	14	5.07	+	2.76	3.66E-03	4.82E-02
mRNA splicing, via spliceosome (GO:0000398)	113	52	19.09	+	2.72	1.54E-08	7.39E-07
cytoplasmic translation (GO:0002181)	170	78	28.72	+	2.72	4.23E-12	3.56E-10
attachment of spindle microtubules to kinetochore (GO:0008608)	35	16	5.91	+	2.71	1.93E-03	2.99E-02
RNA surveillance (GO:0071025)	35	16	5.91	+	2.71	1.93E-03	2.98E-02
RNA splicing, via transesterification reactions with bulged adenosine as nucleophile (GO:0000377)	114	52	19.26	+	2.70	1.85E-08	8.82E-07
regulation of protein polymerization (GO:0032271)	33	15	5.57	+	2.69	2.84E-03	3.97E-02
maturation of 5.8S rRNA from tricistronic rRNA transcript (SSU-rRNA, 5.8S rRNA, LSU-rRNA) (GO:0000466)	92	41	15.54	+	2.64	1.11E-06	3.88E-05
maturation of 5.8S rRNA (GO:0000460)	92	41	15.54	+	2.64	1.11E-06	3.86E-05
maturation of SSU-rRNA from tricistronic rRNA transcript (SSU-rRNA, 5.8S rRNA, LSU-rRNA) (GO:0000462)	104	46	17.57	+	2.62	2.47E-07	9.54E-06
transcription by RNA polymerase III (GO:0006383)	34	15	5.74	+	2.61	3.35E-03	4.44E-02
endonucleolytic cleavage of tricistronic rRNA transcript (SSU-rRNA, 5.8S rRNA, LSU-rRNA) (GO:0000479)	59	26	9.97	+	2.61	1.26E-04	2.93E-03
endonucleolytic cleavage involved in rRNA processing (GO:0000478)	59	26	9.97	+	2.61	1.26E-04	2.92E-03
regulation of protein modification by small protein conjugation or removal (GO:1903320)	41	18	6.93	+	2.60	1.29E-03	2.14E-02
ribonucleoprotein complex biogenesis (GO:0022613)	478	209	80.75	+	2.59	6.74E-30	3.78E-27
ribonucleoprotein complex assembly (GO:0022618)	167	73	28.21	+	2.59	1.24E-10	8.55E-09
ribonucleoprotein complex subunit organization (GO:0071826)	174	76	29.39	+	2.59	4.58E-11	3.26E-09
cellular response to heat (GO:0034605)	39	17	6.59	+	2.58	1.87E-03	2.93E-02
ncRNA transcription (GO:0098781)	62	27	10.47	+	2.58	1.02E-04	2.40E-03
chromatin remodeling (GO:0006338)	221	96	37.33	+	2.57	1.44E-13	1.48E-11
sno(s)RNA metabolic process (GO:0016074)	53	23	8.95	+	2.57	3.92E-04	7.92E-03
ribosomal small subunit biogenesis (GO:0042274)	141	61	23.82	+	2.56	5.51E-09	2.81E-07
rRNA processing (GO:0006364)	289	125	48.82	+	2.56	1.90E-17	3.00E-15
RNA splicing, via transesterification reactions (GO:0000375)	123	53	20.78	+	2.55	8.65E-08	3.64E-06
rRNA metabolic process (GO:0016072)	339	146	57.27	+	2.55	3.36E-20	5.66E-18
silent mating-type cassette heterochromatin formation (GO:0030466)	42	18	7.09	+	2.54	2.40E-03	3.45E-02
cleavage involved in rRNA processing (GO:0000469)	84	36	14.19	+	2.54	9.65E-06	2.84E-04
ribosome biogenesis (GO:0042254)	396	169	66.89	+	2.53	5.46E-23	1.31E-20
sno(s)RNA processing (GO:0043144)	47	20	7.94	+	2.52	1.22E-03	2.05E-02
transcription by RNA polymerase II (GO:0006366)	158	67	26.69	+	2.51	1.78E-09	9.46E-08
nuclear transport (GO:0051169)	175	74	29.56	+	2.50	2.91E-10	1.86E-08
nucleocytoplasmic transport (GO:0006913)	175	74	29.56	+	2.50	2.91E-10	1.84E-08
establishment of RNA localization (GO:0051236)	131	55	22.13	+	2.49	6.85E-08	2.93E-06
RNA transport (GO:0050658)	131	55	22.13	+	2.49	6.85E-08	2.91E-06
chromatin organization (GO:0006325)	293	123	49.50	+	2.49	2.76E-16	3.24E-14
maturation of SSU-rRNA (GO:0030490)	117	49	19.76	+	2.48	4.68E-07	1.76E-05
transcription initiation at RNA polymerase II promoter (GO:0006367)	48	20	8.11	+	2.47	1.38E-03	2.27E-02
nucleic acid transport (GO:0050657)	133	55	22.47	+	2.45	1.31E-07	5.29E-06
regulation of macroautophagy (GO:0016241)	44	18	7.43	+	2.42	2.92E-03	4.05E-02
endonucleolytic cleavage in ITS1 to separate SSU-rRNA from 5.8S rRNA and LSU-rRNA from tricistronic rRNA transcript (SSU-rRNA, 5.8S rRNA, LSU-rRNA) (GO:0000447)	44	18	7.43	+	2.42	2.92E-03	4.04E-02
histone modification (GO:0016570)	120	49	20.27	+	2.42	7.01E-07	2.55E-05
protein import into nucleus (GO:0006606)	64	26	10.81	+	2.40	3.81E-04	7.73E-03
mRNA catabolic process (GO:0006402)	116	47	19.60	+	2.40	1.43E-06	4.87E-05
regulation of growth (GO:0040008)	57	23	9.63	+	2.39	1.05E-03	1.86E-02
positive regulation of cellular component biogenesis (GO:0044089)	67	27	11.32	+	2.39	2.98E-04	6.36E-03
RNA localization (GO:0006403)	149	60	25.17	+	2.38	6.40E-08	2.77E-06
regulation of DNA-templated DNA replication (GO:0090329)	45	18	7.60	+	2.37	3.31E-03	4.42E-02
positive regulation of cytoskeleton organization (GO:0051495)	45	18	7.60	+	2.37	3.31E-03	4.41E-02
response to heat (GO:0009408)	55	22	9.29	+	2.37	1.52E-03	2.46E-02
histone acetylation (GO:0016573)	55	22	9.29	+	2.37	1.52E-03	2.46E-02
nuclear-transcribed mRNA catabolic process (GO:0000956)	113	45	19.09	+	2.36	5.12E-06	1.60E-04
regulation of chromosome segregation (GO:0051983)	58	23	9.80	+	2.35	1.15E-03	1.93E-02
internal protein amino acid acetylation (GO:0006475)	56	22	9.46	+	2.33	1.65E-03	2.64E-02
peptidyl-lysine acetylation (GO:0018394)	56	22	9.46	+	2.33	1.65E-03	2.63E-02
internal peptidyl-lysine acetylation (GO:0018393)	56	22	9.46	+	2.33	1.65E-03	2.62E-02
import into nucleus (GO:0051170)	69	27	11.66	+	2.32	5.96E-04	1.15E-02
protein-DNA complex subunit organization (GO:0071824)	146	57	24.66	+	2.31	4.09E-07	1.55E-05
cell budding (GO:0007114)	54	21	9.12	+	2.30	2.38E-03	3.44E-02
regulation of DNA replication (GO:0006275)	54	21	9.12	+	2.30	2.38E-03	3.43E-02
asexual reproduction (GO:0019954)	54	21	9.12	+	2.30	2.38E-03	3.42E-02
protein-containing complex disassembly (GO:0032984)	67	26	11.32	+	2.30	8.56E-04	1.55E-02
mRNA processing (GO:0006397)	210	81	35.47	+	2.28	1.30E-09	7.05E-08
regulation of protein modification process (GO:0031399)	156	60	26.35	+	2.28	2.11E-07	8.25E-06
heterochromatin organization (GO:0070828)	117	45	19.76	+	2.28	7.52E-06	2.28E-04
negative regulation of gene expression, epigenetic (GO:0045814)	117	45	19.76	+	2.28	7.52E-06	2.26E-04
heterochromatin formation (GO:0031507)	117	45	19.76	+	2.28	7.52E-06	2.25E-04
regulation of supramolecular fiber organization (GO:1902903)	60	23	10.14	+	2.27	1.43E-03	2.34E-02
epigenetic regulation of gene expression (GO:0040029)	118	45	19.93	+	2.26	1.27E-05	3.65E-04
response to temperature stimulus (GO:0009266)	58	22	9.80	+	2.25	2.04E-03	3.09E-02
establishment of organelle localization (GO:0051656)	124	47	20.95	+	2.24	7.30E-06	2.22E-04
protein localization to nucleus (GO:0034504)	74	28	12.50	+	2.24	5.40E-04	1.06E-02
negative regulation of mitotic cell cycle (GO:0045930)	82	31	13.85	+	2.24	3.50E-04	7.30E-03
RNA catabolic process (GO:0006401)	143	54	24.16	+	2.24	1.52E-06	5.12E-05
negative regulation of gene expression (GO:0010629)	265	100	44.77	+	2.23	3.70E-11	2.75E-09
negative regulation of translation (GO:0017148)	72	27	12.16	+	2.22	7.67E-04	1.41E-02
RNA processing (GO:0006396)	585	218	98.82	+	2.21	9.52E-24	2.40E-21
RNA splicing (GO:0008380)	145	54	24.49	+	2.20	2.81E-06	9.17E-05
ribosome assembly (GO:0042255)	78	29	13.18	+	2.20	7.06E-04	1.32E-02
negative regulation of catalytic activity (GO:0043086)	70	26	11.82	+	2.20	1.09E-03	1.90E-02
mRNA metabolic process (GO:0016071)	318	118	53.72	+	2.20	1.39E-12	1.25E-10
negative regulation of mitotic cell cycle phase transition (GO:1901991)	62	23	10.47	+	2.20	2.65E-03	3.75E-02
regulation of protein-containing complex assembly (GO:0043254)	81	30	13.68	+	2.19	5.32E-04	1.05E-02
nucleic acid-templated transcription (GO:0097659)	243	90	41.05	+	2.19	7.45E-10	4.28E-08
DNA-templated transcription (GO:0006351)	243	90	41.05	+	2.19	7.45E-10	4.23E-08
constitutive heterochromatin formation (GO:0140719)	81	30	13.68	+	2.19	5.32E-04	1.05E-02
RNA biosynthetic process (GO:0032774)	247	91	41.72	+	2.18	8.90E-10	4.94E-08
negative regulation of cellular macromolecule biosynthetic process (GO:2000113)	76	28	12.84	+	2.18	1.00E-03	1.79E-02
DNA-templated DNA replication (GO:0006261)	109	40	18.41	+	2.17	7.67E-05	1.89E-03
negative regulation of cellular amide metabolic process (GO:0034249)	74	27	12.50	+	2.16	1.42E-03	2.32E-02
DNA repair (GO:0006281)	299	109	50.51	+	2.16	2.14E-11	1.67E-09
ncRNA processing (GO:0034470)	412	150	69.60	+	2.16	2.00E-15	2.30E-13
protein-DNA complex assembly (GO:0065004)	110	40	18.58	+	2.15	8.21E-05	2.01E-03
cellular response to DNA damage stimulus (GO:0006974)	341	124	57.60	+	2.15	9.23E-13	8.63E-11
positive regulation of catabolic process (GO:0009896)	111	40	18.75	+	2.13	8.91E-05	2.14E-03
negative regulation of cell cycle phase transition (GO:1901988)	100	36	16.89	+	2.13	1.88E-04	4.20E-03
DNA-templated transcription initiation (GO:0006352)	67	24	11.32	+	2.12	2.42E-03	3.46E-02
mitotic cell cycle checkpoint signaling (GO:0007093)	70	25	11.82	+	2.11	2.82E-03	3.95E-02
regulation of mRNA metabolic process (GO:1903311)	87	31	14.70	+	2.11	7.93E-04	1.45E-02
positive regulation of organelle organization (GO:0010638)	93	33	15.71	+	2.10	4.68E-04	9.30E-03
nucleobase-containing compound transport (GO:0015931)	182	64	30.74	+	2.08	1.18E-06	4.04E-05
DNA replication (GO:0006260)	128	45	21.62	+	2.08	6.30E-05	1.58E-03
positive regulation of cellular component organization (GO:0051130)	137	48	23.14	+	2.07	2.92E-05	7.97E-04
positive regulation of cellular catabolic process (GO:0031331)	103	36	17.40	+	2.07	3.41E-04	7.14E-03
negative regulation of cell cycle (GO:0045786)	132	46	22.30	+	2.06	5.17E-05	1.35E-03
regulation of cytoskeleton organization (GO:0051493)	89	31	15.03	+	2.06	9.13E-04	1.65E-02
organelle localization (GO:0051640)	201	70	33.95	+	2.06	5.61E-07	2.09E-05
protein acylation (GO:0043543)	75	26	12.67	+	2.05	2.46E-03	3.52E-02
ncRNA metabolic process (GO:0034660)	520	180	87.84	+	2.05	1.27E-16	1.65E-14
chromosome segregation (GO:0007059)	183	63	30.91	+	2.04	2.91E-06	9.41E-05
negative regulation of protein metabolic process (GO:0051248)	122	42	20.61	+	2.04	1.69E-04	3.83E-03
regulation of protein metabolic process (GO:0051246)	369	127	62.33	+	2.04	1.19E-11	9.83E-10
cell cycle checkpoint signaling (GO:0000075)	93	32	15.71	+	2.04	1.13E-03	1.93E-02
negative regulation of cell cycle process (GO:0010948)	125	43	21.12	+	2.04	1.29E-04	2.96E-03
non-membrane-bounded organelle assembly (GO:0140694)	140	48	23.65	+	2.03	5.17E-05	1.35E-03
regulation of protein phosphorylation (GO:0001932)	82	28	13.85	+	2.02	2.29E-03	3.36E-02
regulation of mitotic cell cycle (GO:0007346)	147	50	24.83	+	2.01	4.85E-05	1.29E-03
positive regulation of RNA biosynthetic process (GO:1902680)	342	116	57.77	+	2.01	2.35E-10	1.58E-08
positive regulation of DNA-templated transcription (GO:0045893)	342	116	57.77	+	2.01	2.35E-10	1.56E-08
positive regulation of nucleic acid-templated transcription (GO:1903508)	342	116	57.77	+	2.01	2.35E-10	1.54E-08
protein-containing complex organization (GO:0043933)	576	195	97.30	+	2.00	2.59E-17	3.97E-15
negative regulation of molecular function (GO:0044092)	86	29	14.53	+	2.00	1.92E-03	3.00E-02
positive regulation of nucleobase-containing compound metabolic process (GO:0045935)	429	144	72.47	+	1.99	2.03E-12	1.80E-10
localization within membrane (GO:0051668)	179	60	30.24	+	1.98	8.94E-06	2.64E-04
positive regulation of RNA metabolic process (GO:0051254)	396	132	66.89	+	1.97	3.01E-11	2.30E-09
regulation of cell cycle (GO:0051726)	295	98	49.83	+	1.97	1.44E-08	6.98E-07
gene expression (GO:0010467)	1206	399	203.72	+	1.96	1.67E-37	1.68E-34
regulation of cellular component organization (GO:0051128)	402	133	67.91	+	1.96	4.00E-11	2.89E-09
RNA metabolic process (GO:0016070)	965	319	163.01	+	1.96	2.58E-28	1.30E-25
positive regulation of transcription by RNA polymerase II (GO:0045944)	297	98	50.17	+	1.95	2.27E-08	1.06E-06
negative regulation of macromolecule metabolic process (GO:0010605)	491	162	82.94	+	1.95	1.55E-13	1.50E-11
regulation of catabolic process (GO:0009894)	179	59	30.24	+	1.95	1.95E-05	5.50E-04
nuclear chromosome segregation (GO:0098813)	149	49	25.17	+	1.95	1.24E-04	2.88E-03
sister chromatid segregation (GO:0000819)	107	35	18.08	+	1.94	1.04E-03	1.85E-02
regulation of cell cycle process (GO:0010564)	248	81	41.89	+	1.93	5.12E-07	1.91E-05
protein-containing complex assembly (GO:0065003)	487	159	82.27	+	1.93	6.62E-13	6.31E-11
double-strand break repair (GO:0006302)	141	46	23.82	+	1.93	1.93E-04	4.30E-03
regulation of mitotic cell cycle phase transition (GO:1901990)	117	38	19.76	+	1.92	7.30E-04	1.36E-02
regulation of signal transduction (GO:0009966)	145	47	24.49	+	1.92	2.29E-04	5.00E-03
regulation of RNA metabolic process (GO:0051252)	642	208	108.45	+	1.92	9.63E-17	1.28E-14
positive regulation of macromolecule biosynthetic process (GO:0010557)	393	127	66.39	+	1.91	3.33E-10	2.08E-08
regulation of cellular catabolic process (GO:0031329)	161	52	27.20	+	1.91	9.56E-05	2.28E-03
regulation of DNA metabolic process (GO:0051052)	124	40	20.95	+	1.91	6.55E-04	1.23E-02
regulation of cell communication (GO:0010646)	152	49	25.68	+	1.91	1.45E-04	3.32E-03
negative regulation of cellular component organization (GO:0051129)	118	38	19.93	+	1.91	1.11E-03	1.90E-02
regulation of signaling (GO:0023051)	146	47	24.66	+	1.91	2.39E-04	5.18E-03
nucleic acid metabolic process (GO:0090304)	1308	421	220.95	+	1.91	1.22E-37	1.54E-34
regulation of cellular component biogenesis (GO:0044087)	168	54	28.38	+	1.90	8.75E-05	2.12E-03
peptidyl-lysine modification (GO:0018205)	112	36	18.92	+	1.90	1.27E-03	2.12E-02
regulation of cellular macromolecule biosynthetic process (GO:2000112)	194	62	32.77	+	1.89	2.56E-05	7.07E-04
regulation of gene expression (GO:0010468)	873	279	147.47	+	1.89	2.30E-22	5.29E-20
protein localization to membrane (GO:0072657)	144	46	24.33	+	1.89	3.24E-04	6.85E-03
positive regulation of cellular metabolic process (GO:0031325)	548	175	92.57	+	1.89	1.51E-13	1.50E-11
chromosome organization (GO:0051276)	332	106	56.08	+	1.89	2.16E-08	1.02E-06
translation (GO:0006412)	367	117	62.00	+	1.89	3.93E-09	2.05E-07
regulation of translation (GO:0006417)	182	58	30.74	+	1.89	4.96E-05	1.31E-03
regulation of RNA biosynthetic process (GO:2001141)	562	179	94.94	+	1.89	1.12E-13	1.23E-11
regulation of DNA-templated transcription (GO:0006355)	562	179	94.94	+	1.89	1.12E-13	1.20E-11
regulation of nucleic acid-templated transcription (GO:1903506)	562	179	94.94	+	1.89	1.12E-13	1.18E-11
positive regulation of cellular biosynthetic process (GO:0031328)	409	130	69.09	+	1.88	6.24E-10	3.67E-08
positive regulation of biosynthetic process (GO:0009891)	410	130	69.26	+	1.88	6.50E-10	3.78E-08
regulation of transferase activity (GO:0051338)	98	31	16.55	+	1.87	3.37E-03	4.45E-02
negative regulation of metabolic process (GO:0009892)	532	168	89.87	+	1.87	1.29E-12	1.19E-10
nucleobase-containing compound catabolic process (GO:0034655)	171	54	28.89	+	1.87	1.02E-04	2.41E-03
cell division (GO:0051301)	279	88	47.13	+	1.87	5.81E-07	2.14E-05
negative regulation of macromolecule biosynthetic process (GO:0010558)	260	82	43.92	+	1.87	1.77E-06	5.91E-05
peptide biosynthetic process (GO:0043043)	371	117	62.67	+	1.87	6.80E-09	3.40E-07
regulation of transcription by RNA polymerase II (GO:0006357)	473	149	79.90	+	1.86	3.42E-11	2.58E-09
regulation of cell cycle phase transition (GO:1901987)	159	50	26.86	+	1.86	1.99E-04	4.41E-03
positive regulation of cellular process (GO:0048522)	719	226	121.46	+	1.86	7.30E-17	9.96E-15
meiosis I cell cycle process (GO:0061982)	105	33	17.74	+	1.86	3.02E-03	4.16E-02
regulation of nucleobase-containing compound metabolic process (GO:0019219)	736	231	124.33	+	1.86	2.72E-17	4.05E-15
positive regulation of metabolic process (GO:0009893)	588	184	99.33	+	1.85	1.47E-13	1.48E-11
regulation of organelle organization (GO:0033043)	259	81	43.75	+	1.85	2.50E-06	8.25E-05
post-transcriptional regulation of gene expression (GO:0010608)	192	60	32.43	+	1.85	5.26E-05	1.36E-03
telomere organization (GO:0032200)	128	40	21.62	+	1.85	1.14E-03	1.94E-02
regulation of cellular amide metabolic process (GO:0034248)	186	58	31.42	+	1.85	8.51E-05	2.08E-03
positive regulation of macromolecule metabolic process (GO:0010604)	540	168	91.22	+	1.84	3.85E-12	3.30E-10
regulation of response to stimulus (GO:0048583)	209	65	35.31	+	1.84	3.22E-05	8.74E-04
negative regulation of biological process (GO:0048519)	728	226	122.98	+	1.84	2.31E-16	2.92E-14
establishment of protein localization to membrane (GO:0090150)	113	35	19.09	+	1.83	2.84E-03	3.96E-02
regulation of macromolecule metabolic process (GO:0060255)	1099	340	185.65	+	1.83	5.69E-26	1.80E-23
regulation of macromolecule biosynthetic process (GO:0010556)	765	236	129.23	+	1.83	5.57E-17	7.82E-15
cellular component biogenesis (GO:0044085)	1087	335	183.62	+	1.82	3.32E-25	9.33E-23
positive regulation of biological process (GO:0048518)	782	240	132.10	+	1.82	4.58E-17	6.61E-15
positive regulation of nitrogen compound metabolic process (GO:0051173)	541	166	91.39	+	1.82	1.29E-11	1.05E-09
negative regulation of nitrogen compound metabolic process (GO:0051172)	351	107	59.29	+	1.80	1.39E-07	5.58E-06
negative regulation of cellular metabolic process (GO:0031324)	369	112	62.33	+	1.80	8.66E-08	3.62E-06
negative regulation of RNA biosynthetic process (GO:1902679)	175	53	29.56	+	1.79	3.51E-04	7.26E-03
negative regulation of DNA-templated transcription (GO:0045892)	175	53	29.56	+	1.79	3.51E-04	7.23E-03
negative regulation of nucleic acid-templated transcription (GO:1903507)	175	53	29.56	+	1.79	3.51E-04	7.20E-03
regulation of cellular biosynthetic process (GO:0031326)	798	241	134.80	+	1.79	2.43E-16	2.99E-14
regulation of nitrogen compound metabolic process (GO:0051171)	998	301	168.59	+	1.79	5.67E-21	1.10E-18
regulation of biosynthetic process (GO:0009889)	800	241	135.14	+	1.78	2.69E-16	3.23E-14
regulation of cellular metabolic process (GO:0031323)	1026	309	173.32	+	1.78	1.76E-21	3.56E-19
negative regulation of cellular process (GO:0048523)	575	173	97.13	+	1.78	1.90E-11	1.53E-09
regulation of metabolic process (GO:0019222)	1180	355	199.33	+	1.78	2.26E-25	6.70E-23
negative regulation of cellular biosynthetic process (GO:0031327)	286	86	48.31	+	1.78	4.59E-06	1.45E-04
negative regulation of biosynthetic process (GO:0009890)	286	86	48.31	+	1.78	4.59E-06	1.44E-04
organelle assembly (GO:0070925)	173	52	29.22	+	1.78	4.66E-04	9.31E-03
DNA metabolic process (GO:0006259)	498	149	84.12	+	1.77	7.94E-10	4.46E-08
negative regulation of nucleobase-containing compound metabolic process (GO:0045934)	231	69	39.02	+	1.77	5.00E-05	1.31E-03
regulation of primary metabolic process (GO:0080090)	1038	309	175.34	+	1.76	8.69E-21	1.63E-18
negative regulation of RNA metabolic process (GO:0051253)	185	55	31.25	+	1.76	3.51E-04	7.29E-03
negative regulation of transcription by RNA polymerase II (GO:0000122)	142	42	23.99	+	1.75	1.94E-03	2.99E-02
peptide metabolic process (GO:0006518)	407	120	68.75	+	1.75	1.03E-07	4.25E-06
amide biosynthetic process (GO:0043604)	413	121	69.77	+	1.73	1.24E-07	5.04E-06
positive regulation of protein metabolic process (GO:0051247)	140	41	23.65	+	1.73	2.57E-03	3.64E-02
regulation of catalytic activity (GO:0050790)	363	106	61.32	+	1.73	8.64E-07	3.09E-05
nucleobase-containing compound metabolic process (GO:0006139)	1528	446	258.12	+	1.73	1.34E-31	1.13E-28
mitotic cell cycle (GO:0000278)	323	94	54.56	+	1.72	5.20E-06	1.61E-04
intracellular signal transduction (GO:0035556)	255	74	43.08	+	1.72	5.51E-05	1.41E-03
mitotic cell cycle process (GO:1903047)	312	90	52.70	+	1.71	1.04E-05	3.03E-04
regulation of phosphate metabolic process (GO:0019220)	146	42	24.66	+	1.70	3.08E-03	4.21E-02
regulation of phosphorus metabolic process (GO:0051174)	147	42	24.83	+	1.69	3.23E-03	4.35E-02
regulation of cellular process (GO:0050794)	1552	435	262.17	+	1.66	6.17E-27	2.08E-24
regulation of biological process (GO:0050789)	1690	473	285.48	+	1.66	3.50E-30	2.21E-27
aromatic compound catabolic process (GO:0019439)	194	54	32.77	+	1.65	1.66E-03	2.62E-02
cellular aromatic compound metabolic process (GO:0006725)	1611	448	272.14	+	1.65	1.92E-27	7.48E-25
nuclear division (GO:0000280)	173	48	29.22	+	1.64	3.34E-03	4.44E-02
heterocycle catabolic process (GO:0046700)	195	54	32.94	+	1.64	1.71E-03	2.70E-02
heterocycle metabolic process (GO:0046483)	1622	449	274.00	+	1.64	3.73E-27	1.35E-24
cell cycle (GO:0007049)	705	195	119.09	+	1.64	3.42E-10	2.11E-08
regulation of molecular function (GO:0065009)	396	109	66.89	+	1.63	7.10E-06	2.18E-04
macromolecule biosynthetic process (GO:0009059)	880	241	148.65	+	1.62	2.78E-12	2.42E-10
RNA phosphodiester bond hydrolysis (GO:0090501)	191	52	32.26	+	1.61	2.83E-03	3.97E-02
intracellular transport (GO:0046907)	721	196	121.80	+	1.61	1.23E-09	6.73E-08
cellular component organization or biogenesis (GO:0071840)	2189	595	369.78	+	1.61	1.49E-39	2.51E-36
cellular nitrogen compound catabolic process (GO:0044270)	199	54	33.62	+	1.61	2.53E-03	3.60E-02
establishment of localization in cell (GO:0051649)	756	205	127.71	+	1.61	5.45E-10	3.24E-08
signal transduction (GO:0007165)	343	93	57.94	+	1.61	5.71E-05	1.45E-03
signaling (GO:0023052)	343	93	57.94	+	1.61	5.71E-05	1.44E-03
cellular nitrogen compound metabolic process (GO:0034641)	1915	518	323.49	+	1.60	5.87E-31	4.24E-28
cellular component assembly (GO:0022607)	733	198	123.82	+	1.60	1.57E-09	8.45E-08
cell cycle process (GO:0022402)	565	152	95.44	+	1.59	2.24E-07	8.71E-06
nucleic acid phosphodiester bond hydrolysis (GO:0090305)	268	72	45.27	+	1.59	6.32E-04	1.20E-02
organic cyclic compound metabolic process (GO:1901360)	1676	450	283.12	+	1.59	1.57E-24	4.18E-22
cellular amide metabolic process (GO:0043603)	481	128	81.25	+	1.58	4.18E-06	1.33E-04
macromolecule localization (GO:0033036)	916	243	154.74	+	1.57	3.76E-11	2.75E-09
macromolecule metabolic process (GO:0043170)	2421	641	408.97	+	1.57	1.75E-41	4.42E-38
organic cyclic compound catabolic process (GO:1901361)	204	54	34.46	+	1.57	3.79E-03	4.96E-02
intracellular protein transport (GO:0006886)	427	113	72.13	+	1.57	2.40E-05	6.70E-04
establishment of protein localization to organelle (GO:0072594)	344	91	58.11	+	1.57	1.77E-04	3.98E-03
nucleobase-containing compound biosynthetic process (GO:0034654)	472	124	79.73	+	1.56	1.07E-05	3.11E-04
establishment of protein localization (GO:0045184)	631	165	106.59	+	1.55	3.27E-07	1.25E-05
biological regulation (GO:0065007)	2014	526	340.22	+	1.55	4.73E-28	1.99E-25
protein targeting (GO:0006605)	249	65	42.06	+	1.55	2.27E-03	3.34E-02
cellular localization (GO:0051641)	1034	268	174.67	+	1.53	1.98E-11	1.57E-09
cellular macromolecule localization (GO:0070727)	791	205	133.62	+	1.53	1.14E-08	5.62E-07
cellular nitrogen compound biosynthetic process (GO:0044271)	931	241	157.27	+	1.53	3.86E-10	2.35E-08
cellular response to stress (GO:0033554)	702	181	118.59	+	1.53	1.61E-07	6.40E-06
response to stress (GO:0006950)	754	194	127.37	+	1.52	5.56E-08	2.44E-06
protein localization (GO:0008104)	771	198	130.24	+	1.52	4.26E-08	1.90E-06
cell communication (GO:0007154)	461	118	77.87	+	1.52	5.67E-05	1.45E-03
cellular macromolecule biosynthetic process (GO:0034645)	529	135	89.36	+	1.51	1.64E-05	4.67E-04
protein localization to organelle (GO:0033365)	439	112	74.16	+	1.51	8.71E-05	2.12E-03
protein transport (GO:0015031)	613	156	103.55	+	1.51	2.77E-06	9.10E-05
cellular response to stimulus (GO:0051716)	1046	266	176.70	+	1.51	1.37E-10	9.35E-09
cellular macromolecule metabolic process (GO:0044260)	1428	363	241.23	+	1.50	3.98E-15	4.47E-13
cellular component organization (GO:0016043)	1894	481	319.95	+	1.50	4.60E-22	9.69E-20
reproduction (GO:0000003)	426	108	71.96	+	1.50	1.51E-04	3.45E-03
cellular macromolecule catabolic process (GO:0044265)	383	97	64.70	+	1.50	3.52E-04	7.21E-03
organelle organization (GO:0006996)	1190	292	201.02	+	1.45	3.94E-10	2.37E-08
reproductive process (GO:0022414)	397	97	67.06	+	1.45	1.11E-03	1.91E-02
response to stimulus (GO:0050896)	1159	282	195.78	+	1.44	2.18E-09	1.15E-07
nitrogen compound metabolic process (GO:0006807)	2854	671	482.11	+	1.39	3.87E-28	1.78E-25
macromolecule catabolic process (GO:0009057)	447	105	75.51	+	1.39	1.98E-03	3.02E-02
aromatic compound biosynthetic process (GO:0019438)	537	126	90.71	+	1.39	7.42E-04	1.37E-02
nitrogen compound transport (GO:0071705)	829	193	140.04	+	1.38	2.24E-05	6.30E-04
heterocycle biosynthetic process (GO:0018130)	550	127	92.91	+	1.37	1.25E-03	2.10E-02
protein metabolic process (GO:0019538)	1356	312	229.06	+	1.36	3.57E-08	1.61E-06
primary metabolic process (GO:0044238)	3060	683	516.91	+	1.32	2.77E-22	6.08E-20
protein modification process (GO:0036211)	700	156	118.25	+	1.32	1.08E-03	1.90E-02
organic substance metabolic process (GO:0071704)	3242	706	547.66	+	1.29	9.36E-21	1.69E-18
organic substance transport (GO:0071702)	921	200	155.58	+	1.29	6.01E-04	1.16E-02
cellular metabolic process (GO:0044237)	3145	681	531.27	+	1.28	1.94E-18	3.16E-16
macromolecule modification (GO:0043412)	803	172	135.65	+	1.27	2.76E-03	3.88E-02
metabolic process (GO:0008152)	3446	738	582.12	+	1.27	9.83E-21	1.71E-18
cellular biosynthetic process (GO:0044249)	1380	287	233.12	+	1.23	3.31E-04	6.97E-03
organic substance biosynthetic process (GO:1901576)	1420	295	239.87	+	1.23	2.42E-04	5.22E-03
biosynthetic process (GO:0009058)	1441	296	243.42	+	1.22	5.39E-04	1.06E-02
localization (GO:0051179)	1545	314	260.99	+	1.20	6.22E-04	1.19E-02
cellular process (GO:0009987)	4980	990	841.25	+	1.18	1.08E-42	5.45E-39
organonitrogen compound metabolic process (GO:1901564)	1884	369	318.26	+	1.16	1.80E-03	2.82E-02
biological_process (GO:0008150)	6005	1022	1014.40	+	1.01	1.98E-03	3.02E-02
organophosphate metabolic process (GO:0019637)	378	38	63.85	-	.60	1.17E-03	1.96E-02
transmembrane transport (GO:0055085)	452	45	76.35	-	.59	2.59E-04	5.56E-03
ion transport (GO:0006811)	341	33	57.60	-	.57	1.10E-03	1.90E-02
carboxylic acid metabolic process (GO:0019752)	392	37	66.22	-	.56	2.19E-04	4.78E-03
organic acid metabolic process (GO:0006082)	413	38	69.77	-	.54	9.79E-05	2.32E-03
oxoacid metabolic process (GO:0043436)	410	37	69.26	-	.53	6.81E-05	1.69E-03
small molecule metabolic process (GO:0044281)	726	64	122.64	-	.52	1.42E-08	6.99E-07
cation transport (GO:0006812)	237	19	40.04	-	.47	7.41E-04	1.38E-02
carbohydrate metabolic process (GO:0005975)	234	18	39.53	-	.46	3.54E-04	7.21E-03
cation transmembrane transport (GO:0098655)	197	15	33.28	-	.45	1.02E-03	1.82E-02
lipid biosynthetic process (GO:0008610)	195	14	32.94	-	.43	6.27E-04	1.20E-02
monocarboxylic acid metabolic process (GO:0032787)	154	11	26.01	-	.42	2.38E-03	3.45E-02
phospholipid metabolic process (GO:0006644)	143	10	24.16	-	.41	3.40E-03	4.48E-02
ion transmembrane transport (GO:0034220)	250	17	42.23	-	.40	3.90E-05	1.05E-03
glycerolipid metabolic process (GO:0046486)	123	8	20.78	-	.39	3.75E-03	4.92E-02
small molecule biosynthetic process (GO:0044283)	314	20	53.04	-	.38	9.32E-07	3.32E-05
small molecule catabolic process (GO:0044282)	149	9	25.17	-	.36	7.97E-04	1.45E-02
cellular lipid metabolic process (GO:0044255)	298	18	50.34	-	.36	7.19E-07	2.60E-05
lipid metabolic process (GO:0006629)	321	19	54.23	-	.35	2.02E-07	7.96E-06
cellular metal ion homeostasis (GO:0006875)	112	6	18.92	-	.32	2.11E-03	3.16E-02
metal ion homeostasis (GO:0055065)	123	6	20.78	-	.29	5.52E-04	1.08E-02
organic acid transport (GO:0015849)	89	4	15.03	-	.27	2.67E-03	3.76E-02
transition metal ion homeostasis (GO:0055076)	93	4	15.71	-	.25	1.92E-03	2.99E-02
alcohol metabolic process (GO:0006066)	117	4	19.76	-	.20	1.13E-04	2.65E-03
organic hydroxy compound biosynthetic process (GO:1901617)	92	3	15.54	-	.19	5.69E-04	1.11E-02
organic hydroxy compound metabolic process (GO:1901615)	154	5	26.01	-	.19	3.30E-06	1.06E-04
carboxylic acid transmembrane transport (GO:1905039)	68	2	11.49	-	.17	3.03E-03	4.15E-02
organic acid transmembrane transport (GO:1903825)	69	2	11.66	-	.17	2.00E-03	3.03E-02
alcohol biosynthetic process (GO:0046165)	72	2	12.16	-	.16	1.37E-03	2.25E-02
membrane lipid metabolic process (GO:0006643)	77	2	13.01	-	.15	9.85E-04	1.76E-02
anion transmembrane transport (GO:0098656)	82	2	13.85	-	.14	4.41E-04	8.84E-03
transposition (GO:0032196)	97	2	16.39	-	.12	6.50E-05	1.63E-03
cellular iron ion homeostasis (GO:0006879)	53	1	8.95	-	.11	3.25E-03	4.36E-02
response to toxic substance (GO:0009636)	54	1	9.12	-	.11	3.25E-03	4.37E-02
water-soluble vitamin metabolic process (GO:0006767)	56	1	9.46	-	.11	2.17E-03	3.25E-02
vitamin metabolic process (GO:0006766)	56	1	9.46	-	.11	2.17E-03	3.24E-02
iron ion homeostasis (GO:0055072)	61	1	10.30	-	.10	1.52E-03	2.45E-02
lipid catabolic process (GO:0016042)	62	1	10.47	-	.10	9.66E-04	1.74E-02
transposition, RNA-mediated (GO:0032197)	91	1	15.37	-	.07	1.63E-05	4.64E-04
amino acid transport (GO:0006865)	57	0	9.63	-	< 0.01	2.09E-04	4.61E-03
Unclassified (UNCLASSIFIED)	45	0	7.60	-	< 0.01	1.98E-03	3.02E-02
amino acid transmembrane transport (GO:0003333)	48	0	8.11	-	< 0.01	1.31E-03	2.16E-02
pyrimidine-containing compound metabolic process (GO:0072527)	42	0	7.09	-	< 0.01	3.00E-03	4.14E-02

## Sheet: H_sapiens
Analysis Type:	PANTHER Overrepresentation Test (Released 20220712)
Annotation Version and Release Date:	GO Ontology database DOI: 10.5281/zenodo.6799722 Released 2022-07-01
Analyzed List:	Client Text Box Input (Homo sapiens)
Reference List:	Homo sapiens (all genes in database)
Test Type:	FISHER
Correction:	FDR
GO biological process complete	Homo sapiens - REFLIST (20589)	Client Text Box Input (2628)	Client Text Box Input (expected)	Client Text Box Input (over/under)	Client Text Box Input (fold Enrichment)	Client Text Box Input (raw P-value)	Client Text Box Input (FDR)
CENP-A containing chromatin assembly (GO:0034080)	7	6	.89	+	6.72	1.77E-03	4.38E-02
chromatin remodeling at centromere (GO:0031055)	7	6	.89	+	6.72	1.77E-03	4.38E-02
regulation of transcription from RNA polymerase II promoter in response to hypoxia (GO:0061418)	11	9	1.40	+	6.41	1.57E-04	5.75E-03
muscle filament sliding (GO:0030049)	11	8	1.40	+	5.70	6.36E-04	1.93E-02
constitutive heterochromatin formation (GO:0140719)	10	7	1.28	+	5.48	1.64E-03	4.11E-02
negative regulation of cell cycle checkpoint (GO:1901977)	10	7	1.28	+	5.48	1.64E-03	4.10E-02
negative regulation of protein sumoylation (GO:0033234)	10	7	1.28	+	5.48	1.64E-03	4.09E-02
centromere complex assembly (GO:0034508)	27	17	3.45	+	4.93	2.63E-06	1.52E-04
facultative heterochromatin formation (GO:0140718)	13	8	1.66	+	4.82	1.39E-03	3.64E-02
actin-myosin filament sliding (GO:0033275)	13	8	1.66	+	4.82	1.39E-03	3.64E-02
protein localization to nuclear envelope (GO:0090435)	13	8	1.66	+	4.82	1.39E-03	3.63E-02
endosome to lysosome transport via multivesicular body sorting pathway (GO:0032510)	17	10	2.17	+	4.61	4.63E-04	1.48E-02
regulation of cellular response to heat (GO:1900034)	17	10	2.17	+	4.61	4.63E-04	1.48E-02
nuclear pore organization (GO:0006999)	14	8	1.79	+	4.48	1.97E-03	4.82E-02
regulation of attachment of spindle microtubules to kinetochore (GO:0051988)	18	10	2.30	+	4.35	6.48E-04	1.96E-02
regulation of mitotic spindle assembly (GO:1901673)	24	13	3.06	+	4.24	1.25E-04	4.79E-03
positive regulation of chromosome segregation (GO:0051984)	26	14	3.32	+	4.22	7.25E-05	3.01E-03
regulation of sister chromatid cohesion (GO:0007063)	21	11	2.68	+	4.10	5.11E-04	1.61E-02
negative regulation of DNA-templated transcription, elongation (GO:0032785)	21	11	2.68	+	4.10	5.11E-04	1.60E-02
mRNA export from nucleus (GO:0006406)	65	33	8.30	+	3.98	3.80E-09	3.66E-07
viral budding via host ESCRT complex (GO:0039702)	22	11	2.81	+	3.92	6.89E-04	2.05E-02
mitotic metaphase plate congression (GO:0007080)	51	25	6.51	+	3.84	4.76E-07	3.26E-05
nuclear membrane reassembly (GO:0031468)	25	12	3.19	+	3.76	5.27E-04	1.64E-02
protein localization to centrosome (GO:0071539)	23	11	2.94	+	3.75	9.15E-04	2.58E-02
mRNA cis splicing, via spliceosome (GO:0045292)	23	11	2.94	+	3.75	9.15E-04	2.58E-02
stimulatory C-type lectin receptor signaling pathway (GO:0002223)	21	10	2.68	+	3.73	1.59E-03	4.04E-02
cellular response to lectin (GO:1990858)	21	10	2.68	+	3.73	1.59E-03	4.03E-02
response to lectin (GO:1990840)	21	10	2.68	+	3.73	1.59E-03	4.02E-02
regulation of mitotic cell cycle spindle assembly checkpoint (GO:0090266)	21	10	2.68	+	3.73	1.59E-03	4.02E-02
regulation of spindle checkpoint (GO:0090231)	21	10	2.68	+	3.73	1.59E-03	4.01E-02
regulation of mitotic spindle checkpoint (GO:1903504)	21	10	2.68	+	3.73	1.59E-03	4.00E-02
nuclear-transcribed mRNA catabolic process, nonsense-mediated decay (GO:0000184)	36	17	4.60	+	3.70	4.57E-05	1.99E-03
regulation of nucleotide-excision repair (GO:2000819)	28	13	3.57	+	3.64	4.00E-04	1.31E-02
heterochromatin formation (GO:0031507)	52	24	6.64	+	3.62	1.84E-06	1.10E-04
regulation of telomere capping (GO:1904353)	26	12	3.32	+	3.62	6.92E-04	2.05E-02
viral budding (GO:0046755)	26	12	3.32	+	3.62	6.92E-04	2.05E-02
metaphase plate congression (GO:0051310)	63	29	8.04	+	3.61	1.68E-07	1.27E-05
protein localization to microtubule organizing center (GO:1905508)	24	11	3.06	+	3.59	1.20E-03	3.22E-02
alternative mRNA splicing, via spliceosome (GO:0000380)	24	11	3.06	+	3.59	1.20E-03	3.21E-02
heterochromatin organization (GO:0070828)	62	28	7.91	+	3.54	3.71E-07	2.61E-05
negative regulation of DNA recombination (GO:0045910)	45	20	5.74	+	3.48	2.00E-05	9.58E-04
positive regulation of histone methylation (GO:0031062)	52	23	6.64	+	3.47	5.23E-06	2.82E-04
regulation of spindle assembly (GO:0090169)	34	15	4.34	+	3.46	2.27E-04	7.92E-03
stress granule assembly (GO:0034063)	25	11	3.19	+	3.45	1.55E-03	3.97E-02
cell cycle DNA replication (GO:0044786)	25	11	3.19	+	3.45	1.55E-03	3.96E-02
protein localization to chromosome, centromeric region (GO:0071459)	25	11	3.19	+	3.45	1.55E-03	3.96E-02
negative regulation of gene expression, epigenetic (GO:0045814)	66	29	8.42	+	3.44	3.62E-07	2.56E-05
regulation of spindle organization (GO:0090224)	48	21	6.13	+	3.43	1.51E-05	7.41E-04
negative regulation of DNA replication (GO:0008156)	32	14	4.08	+	3.43	3.89E-04	1.28E-02
protein localization to microtubule cytoskeleton (GO:0072698)	39	17	4.98	+	3.42	9.95E-05	3.97E-03
histone H3-K4 methylation (GO:0051568)	46	20	5.87	+	3.41	2.57E-05	1.20E-03
chromosome localization (GO:0050000)	83	36	10.59	+	3.40	1.92E-08	1.67E-06
regulation of mitotic spindle organization (GO:0060236)	44	19	5.62	+	3.38	4.38E-05	1.93E-03
membrane fission (GO:0090148)	44	19	5.62	+	3.38	4.38E-05	1.92E-03
RNA export from nucleus (GO:0006405)	84	36	10.72	+	3.36	2.45E-08	2.09E-06
maturation of LSU-rRNA (GO:0000470)	28	12	3.57	+	3.36	1.15E-03	3.12E-02
regulation of centrosome cycle (GO:0046605)	56	24	7.15	+	3.36	5.04E-06	2.74E-04
regulation of androgen receptor signaling pathway (GO:0060765)	28	12	3.57	+	3.36	1.15E-03	3.12E-02
positive regulation of stem cell population maintenance (GO:1902459)	47	20	6.00	+	3.33	3.28E-05	1.48E-03
negative regulation of mRNA processing (GO:0050686)	26	11	3.32	+	3.31	1.99E-03	4.84E-02
establishment of chromosome localization (GO:0051303)	76	32	9.70	+	3.30	1.98E-07	1.47E-05
protein localization to cytoskeleton (GO:0044380)	43	18	5.49	+	3.28	9.46E-05	3.80E-03
negative regulation of chromosome organization (GO:2001251)	82	34	10.47	+	3.25	1.11E-07	8.73E-06
protein localization to chromosome (GO:0034502)	75	31	9.57	+	3.24	4.20E-07	2.92E-05
histone H4 acetylation (GO:0043967)	61	25	7.79	+	3.21	6.04E-06	3.21E-04
multivesicular body assembly (GO:0036258)	32	13	4.08	+	3.18	1.08E-03	2.96E-02
positive regulation of mitochondrial membrane permeability (GO:0035794)	32	13	4.08	+	3.18	1.08E-03	2.95E-02
regulation of telomere maintenance (GO:0032204)	101	41	12.89	+	3.18	9.30E-09	8.68E-07
cytokinetic process (GO:0032506)	37	15	4.72	+	3.18	4.65E-04	1.48E-02
endosome transport via multivesicular body sorting pathway (GO:0032509)	42	17	5.36	+	3.17	2.02E-04	7.14E-03
regulation of chromosome organization (GO:0033044)	252	102	32.17	+	3.17	1.34E-19	2.48E-17
regulation of centrosome duplication (GO:0010824)	47	19	6.00	+	3.17	8.85E-05	3.59E-03
regulation of telomerase activity (GO:0051972)	50	20	6.38	+	3.13	6.55E-05	2.75E-03
protein localization to chromatin (GO:0071168)	30	12	3.83	+	3.13	1.84E-03	4.54E-02
epigenetic regulation of gene expression (GO:0040029)	118	47	15.06	+	3.12	1.29E-09	1.27E-07
positive regulation of chromosome organization (GO:2001252)	106	42	13.53	+	3.10	1.08E-08	9.90E-07
multivesicular body organization (GO:0036257)	33	13	4.21	+	3.09	1.35E-03	3.57E-02
vesicle transport along microtubule (GO:0047496)	41	16	5.23	+	3.06	4.27E-04	1.39E-02
negative regulation of telomere maintenance (GO:0032205)	36	14	4.60	+	3.05	9.86E-04	2.75E-02
multivesicular body sorting pathway (GO:0071985)	49	19	6.25	+	3.04	1.37E-04	5.19E-03
regulation of cell cycle checkpoint (GO:1901976)	49	19	6.25	+	3.04	1.37E-04	5.17E-03
protein sumoylation (GO:0016925)	49	19	6.25	+	3.04	1.37E-04	5.16E-03
regulation of chromatin organization (GO:1902275)	44	17	5.62	+	3.03	3.14E-04	1.06E-02
regulation of histone H3-K4 methylation (GO:0051569)	39	15	4.98	+	3.01	7.22E-04	2.11E-02
microtubule polymerization (GO:0046785)	39	15	4.98	+	3.01	7.22E-04	2.11E-02
mitotic cytokinesis (GO:0000281)	81	31	10.34	+	3.00	1.57E-06	9.37E-05
regulation of mRNA splicing, via spliceosome (GO:0048024)	110	42	14.04	+	2.99	3.63E-08	3.04E-06
mitotic spindle organization (GO:0007052)	97	37	12.38	+	2.99	2.68E-07	1.93E-05
peptidyl-lysine trimethylation (GO:0018023)	42	16	5.36	+	2.98	5.29E-04	1.64E-02
regulation of histone methylation (GO:0031060)	84	32	10.72	+	2.98	1.16E-06	7.13E-05
regulation of mitotic metaphase/anaphase transition (GO:0030071)	92	35	11.74	+	2.98	6.09E-07	4.03E-05
positive regulation of telomere maintenance (GO:0032206)	66	25	8.42	+	2.97	1.79E-05	8.63E-04
regulation of DNA-templated transcription elongation (GO:0032784)	103	39	13.15	+	2.97	1.31E-07	1.00E-05
ubiquitin-dependent protein catabolic process via the multivesicular body sorting pathway (GO:0043162)	37	14	4.72	+	2.96	1.22E-03	3.25E-02
positive regulation of cytokinesis (GO:0032467)	45	17	5.74	+	2.96	3.87E-04	1.28E-02
nucleosome organization (GO:0034728)	125	47	15.96	+	2.95	6.63E-09	6.27E-07
nuclear export (GO:0051168)	133	50	16.98	+	2.95	2.14E-09	2.08E-07
positive regulation of RNA splicing (GO:0033120)	40	15	5.11	+	2.94	8.90E-04	2.52E-02
histone H3 acetylation (GO:0043966)	62	23	7.91	+	2.91	4.95E-05	2.14E-03
regulation of alternative mRNA splicing, via spliceosome (GO:0000381)	62	23	7.91	+	2.91	4.95E-05	2.13E-03
regulation of telomere maintenance via telomerase (GO:0032210)	54	20	6.89	+	2.90	1.53E-04	5.62E-03
histone methylation (GO:0016571)	108	40	13.79	+	2.90	1.22E-07	9.41E-06
chromatin remodeling (GO:0006338)	323	119	41.23	+	2.89	6.20E-20	1.19E-17
regulation of metaphase/anaphase transition of cell cycle (GO:1902099)	95	35	12.13	+	2.89	8.60E-07	5.48E-05
RNA splicing, via transesterification reactions (GO:0000375)	247	91	31.53	+	2.89	1.40E-15	2.16E-13
regulation of mitotic sister chromatid separation (GO:0010965)	98	36	12.51	+	2.88	6.16E-07	4.06E-05
RNA splicing (GO:0008380)	368	135	46.97	+	2.87	3.54E-22	7.61E-20
positive regulation of DNA-templated transcription, elongation (GO:0032786)	60	22	7.66	+	2.87	1.34E-04	5.10E-03
mRNA splicing, via spliceosome (GO:0000398)	243	89	31.02	+	2.87	3.77E-15	5.58E-13
RNA splicing, via transesterification reactions with bulged adenosine as nucleophile (GO:0000377)	243	89	31.02	+	2.87	3.77E-15	5.52E-13
nucleosome assembly (GO:0006334)	93	34	11.87	+	2.86	1.39E-06	8.32E-05
regulation of sister chromatid segregation (GO:0033045)	107	39	13.66	+	2.86	2.32E-07	1.70E-05
microtubule cytoskeleton organization involved in mitosis (GO:1902850)	129	47	16.47	+	2.85	1.31E-08	1.19E-06
regulation of DNA-templated transcription initiation (GO:2000142)	77	28	9.83	+	2.85	1.39E-05	6.93E-04
histone lysine methylation (GO:0034968)	77	28	9.83	+	2.85	1.39E-05	6.91E-04
regulation of DNA-templated transcription in response to stress (GO:0043620)	47	17	6.00	+	2.83	5.80E-04	1.78E-02
nuclear envelope organization (GO:0006998)	61	22	7.79	+	2.83	1.46E-04	5.41E-03
positive regulation of transcription elongation by RNA polymerase II (GO:0032968)	50	18	6.38	+	2.82	7.03E-04	2.07E-02
regulation of RNA splicing (GO:0043484)	181	65	23.10	+	2.81	4.06E-11	4.48E-09
regulation of chromosome segregation (GO:0051983)	131	47	16.72	+	2.81	2.98E-08	2.51E-06
regulation of mitotic sister chromatid segregation (GO:0033047)	56	20	7.15	+	2.80	3.33E-04	1.11E-02
regulation of stem cell population maintenance (GO:2000036)	70	25	8.93	+	2.80	5.04E-05	2.16E-03
regulation of mRNA processing (GO:0050684)	140	50	17.87	+	2.80	1.02E-08	9.43E-07
axo-dendritic transport (GO:0008088)	73	26	9.32	+	2.79	3.57E-05	1.61E-03
mRNA transport (GO:0051028)	138	49	17.61	+	2.78	1.61E-08	1.43E-06
cell cycle G2/M phase transition (GO:0044839)	62	22	7.91	+	2.78	1.62E-04	5.90E-03
mitotic spindle assembly (GO:0090307)	51	18	6.51	+	2.77	7.61E-04	2.21E-02
protein-DNA complex subunit organization (GO:0071824)	233	82	29.74	+	2.76	2.73E-13	3.63E-11
regulation of chromosome separation (GO:1905818)	111	39	14.17	+	2.75	7.32E-07	4.68E-05
regulation of cytokinesis (GO:0032465)	94	33	12.00	+	2.75	3.60E-06	2.02E-04
protein-DNA complex assembly (GO:0065004)	200	70	25.53	+	2.74	2.12E-11	2.42E-09
histone deacetylation (GO:0016575)	60	21	7.66	+	2.74	2.59E-04	8.91E-03
nucleus organization (GO:0006997)	146	51	18.64	+	2.74	1.08E-08	9.85E-07
positive regulation of DNA-templated transcription initiation (GO:2000144)	66	23	8.42	+	2.73	1.29E-04	4.95E-03
organelle transport along microtubule (GO:0072384)	81	28	10.34	+	2.71	2.47E-05	1.16E-03
G2/M transition of mitotic cell cycle (GO:0000086)	58	20	7.40	+	2.70	4.13E-04	1.35E-02
negative regulation of DNA metabolic process (GO:0051053)	148	51	18.89	+	2.70	1.47E-08	1.31E-06
regulation of transcription initiation by RNA polymerase II (GO:0060260)	67	23	8.55	+	2.69	1.49E-04	5.48E-03
translational initiation (GO:0006413)	70	24	8.93	+	2.69	1.06E-04	4.21E-03
histone acetylation (GO:0016573)	126	43	16.08	+	2.67	2.59E-07	1.88E-05
peptidyl-lysine acetylation (GO:0018394)	135	46	17.23	+	2.67	9.86E-08	7.93E-06
DNA-templated transcription elongation (GO:0006354)	185	63	23.61	+	2.67	4.74E-10	4.86E-08
positive regulation of transcription initiation by RNA polymerase II (GO:0060261)	59	20	7.53	+	2.66	4.69E-04	1.49E-02
nucleocytoplasmic transport (GO:0006913)	248	84	31.65	+	2.65	7.34E-13	9.43E-11
nuclear transport (GO:0051169)	248	84	31.65	+	2.65	7.34E-13	9.36E-11
regulation of telomere maintenance via telomere lengthening (GO:1904356)	62	21	7.91	+	2.65	3.34E-04	1.11E-02
regulation of transcription elongation by RNA polymerase II (GO:0034243)	86	29	10.98	+	2.64	3.91E-05	1.75E-03
positive regulation of double-strand break repair (GO:2000781)	89	30	11.36	+	2.64	2.72E-05	1.26E-03
RNA localization (GO:0006403)	190	64	24.25	+	2.64	7.41E-10	7.40E-08
chromatin organization (GO:0006325)	585	197	74.67	+	2.64	3.40E-28	1.30E-25
organelle membrane fusion (GO:0090174)	104	35	13.27	+	2.64	4.76E-06	2.60E-04
positive regulation of histone modification (GO:0031058)	107	36	13.66	+	2.64	3.40E-06	1.92E-04
internal protein amino acid acetylation (GO:0006475)	134	45	17.10	+	2.63	2.96E-07	2.12E-05
mitotic nuclear division (GO:0140014)	173	58	22.08	+	2.63	3.65E-09	3.53E-07
cytokinesis (GO:0000910)	111	37	14.17	+	2.61	2.77E-06	1.58E-04
regulation of DNA-templated DNA replication (GO:0090329)	57	19	7.28	+	2.61	7.53E-04	2.19E-02
vesicle fusion (GO:0006906)	102	34	13.02	+	2.61	7.49E-06	3.90E-04
centrosome cycle (GO:0007098)	90	30	11.49	+	2.61	2.95E-05	1.35E-03
internal peptidyl-lysine acetylation (GO:0018393)	132	44	16.85	+	2.61	4.51E-07	3.10E-05
axonal transport (GO:0098930)	60	20	7.66	+	2.61	5.37E-04	1.66E-02
histone modification (GO:0016570)	365	121	46.59	+	2.60	2.38E-17	3.81E-15
positive regulation of DNA repair (GO:0045739)	130	43	16.59	+	2.59	6.89E-07	4.48E-05
cytoskeleton-dependent cytokinesis (GO:0061640)	109	36	13.91	+	2.59	4.40E-06	2.44E-04
regulation of DNA repair (GO:0006282)	212	70	27.06	+	2.59	1.54E-10	1.63E-08
peptidyl-lysine methylation (GO:0018022)	91	30	11.62	+	2.58	3.25E-05	1.47E-03
ribosomal large subunit biogenesis (GO:0042273)	76	25	9.70	+	2.58	1.90E-04	6.79E-03
protein deacetylation (GO:0006476)	64	21	8.17	+	2.57	4.45E-04	1.44E-02
positive regulation of neuron apoptotic process (GO:0043525)	55	18	7.02	+	2.56	1.21E-03	3.23E-02
mRNA processing (GO:0006397)	451	147	57.57	+	2.55	3.32E-20	6.43E-18
regulation of protein acetylation (GO:1901983)	89	29	11.36	+	2.55	5.08E-05	2.17E-03
regulation of microtubule cytoskeleton organization (GO:0070507)	157	51	20.04	+	2.54	1.09E-07	8.62E-06
DNA-templated DNA replication (GO:0006261)	139	45	17.74	+	2.54	4.77E-07	3.25E-05
regulation of DNA replication (GO:0006275)	136	44	17.36	+	2.53	6.62E-07	4.32E-05
regulation of protein deacetylation (GO:0090311)	62	20	7.91	+	2.53	7.15E-04	2.09E-02
regulation of DNA metabolic process (GO:0051052)	541	174	69.05	+	2.52	3.64E-23	8.15E-21
regulation of translational initiation (GO:0006446)	84	27	10.72	+	2.52	1.12E-04	4.34E-03
RNA transport (GO:0050658)	168	54	21.44	+	2.52	4.60E-08	3.83E-06
nucleic acid transport (GO:0050657)	168	54	21.44	+	2.52	4.60E-08	3.81E-06
microtubule organizing center organization (GO:0031023)	106	34	13.53	+	2.51	1.28E-05	6.45E-04
regulation of histone modification (GO:0031056)	181	58	23.10	+	2.51	1.41E-08	1.27E-06
regulation of double-strand break repair (GO:2000779)	135	43	17.23	+	2.50	1.18E-06	7.20E-05
rRNA processing (GO:0006364)	223	71	28.46	+	2.49	6.52E-10	6.64E-08
peptidyl-lysine modification (GO:0018205)	311	99	39.70	+	2.49	2.08E-13	2.78E-11
establishment of RNA localization (GO:0051236)	170	54	21.70	+	2.49	5.78E-08	4.75E-06
ribosome biogenesis (GO:0042254)	303	96	38.68	+	2.48	6.27E-13	8.12E-11
cellular senescence (GO:0090398)	60	19	7.66	+	2.48	1.15E-03	3.12E-02
mitotic sister chromatid segregation (GO:0000070)	120	38	15.32	+	2.48	6.02E-06	3.21E-04
regulation of ubiquitin-protein transferase activity (GO:0051438)	57	18	7.28	+	2.47	1.59E-03	4.04E-02
regulation of DNA recombination (GO:0000018)	133	42	16.98	+	2.47	1.85E-06	1.10E-04
negative regulation of mRNA metabolic process (GO:1903312)	92	29	11.74	+	2.47	7.31E-05	3.02E-03
mitotic cell cycle checkpoint signaling (GO:0007093)	127	40	16.21	+	2.47	3.51E-06	1.98E-04
organelle localization by membrane tethering (GO:0140056)	83	26	10.59	+	2.45	1.95E-04	6.94E-03
mRNA metabolic process (GO:0016071)	607	190	77.48	+	2.45	3.50E-24	8.72E-22
regulation of mRNA metabolic process (GO:1903311)	301	94	38.42	+	2.45	1.75E-12	2.16E-10
organelle fusion (GO:0048284)	125	39	15.96	+	2.44	5.49E-06	2.94E-04
positive regulation of neuron death (GO:1901216)	93	29	11.87	+	2.44	8.35E-05	3.41E-03
regulation of peptidyl-lysine acetylation (GO:2000756)	77	24	9.83	+	2.44	3.81E-04	1.26E-02
telomere organization (GO:0032200)	103	32	13.15	+	2.43	5.00E-05	2.15E-03
protein acetylation (GO:0006473)	155	48	19.78	+	2.43	5.73E-07	3.81E-05
ribonucleoprotein complex biogenesis (GO:0022613)	449	139	57.31	+	2.43	1.18E-17	1.96E-15
positive regulation of response to DNA damage stimulus (GO:2001022)	168	52	21.44	+	2.42	2.61E-07	1.88E-05
regulation of response to DNA damage stimulus (GO:2001020)	314	97	40.08	+	2.42	1.47E-12	1.84E-10
regulation of histone acetylation (GO:0035065)	68	21	8.68	+	2.42	1.06E-03	2.93E-02
protein methylation (GO:0006479)	149	46	19.02	+	2.42	1.09E-06	6.77E-05
protein alkylation (GO:0008213)	149	46	19.02	+	2.42	1.09E-06	6.74E-05
activation of innate immune response (GO:0002218)	65	20	8.30	+	2.41	1.50E-03	3.88E-02
mitotic cell cycle process (GO:1903047)	533	163	68.03	+	2.40	6.54E-20	1.24E-17
regulation of double-strand break repair via homologous recombination (GO:0010569)	72	22	9.19	+	2.39	8.30E-04	2.37E-02
protein import into nucleus (GO:0006606)	115	35	14.68	+	2.38	2.53E-05	1.19E-03
membrane docking (GO:0022406)	92	28	11.74	+	2.38	2.13E-04	7.50E-03
nuclear-transcribed mRNA catabolic process (GO:0000956)	102	31	13.02	+	2.38	8.36E-05	3.40E-03
rRNA metabolic process (GO:0016072)	254	77	32.42	+	2.38	6.98E-10	7.06E-08
RNA processing (GO:0006396)	868	262	110.79	+	2.36	3.50E-31	1.67E-28
regulation of intracellular steroid hormone receptor signaling pathway (GO:0033143)	73	22	9.32	+	2.36	9.24E-04	2.59E-02
spliceosomal complex assembly (GO:0000245)	73	22	9.32	+	2.36	9.24E-04	2.59E-02
negative regulation of mitotic cell cycle phase transition (GO:1901991)	166	50	21.19	+	2.36	7.11E-07	4.59E-05
mitotic cell cycle phase transition (GO:0044772)	173	52	22.08	+	2.35	4.18E-07	2.91E-05
cell cycle phase transition (GO:0044770)	183	55	23.36	+	2.35	2.56E-07	1.87E-05
spindle organization (GO:0007051)	160	48	20.42	+	2.35	1.36E-06	8.21E-05
cell cycle G1/S phase transition (GO:0044843)	87	26	11.10	+	2.34	4.53E-04	1.45E-02
telomere maintenance (GO:0000723)	94	28	12.00	+	2.33	2.49E-04	8.63E-03
DNA replication (GO:0006260)	205	61	26.17	+	2.33	7.86E-08	6.35E-06
chromosome organization (GO:0051276)	444	132	56.67	+	2.33	1.15E-15	1.78E-13
intrinsic apoptotic signaling pathway in response to DNA damage (GO:0008630)	74	22	9.45	+	2.33	1.04E-03	2.87E-02
regulation of DNA biosynthetic process (GO:2000278)	125	37	15.96	+	2.32	2.77E-05	1.27E-03
regulation of G2/M transition of mitotic cell cycle (GO:0010389)	98	29	12.51	+	2.32	1.97E-04	6.97E-03
exocytic process (GO:0140029)	71	21	9.06	+	2.32	1.44E-03	3.74E-02
regulation of mitotic cell cycle phase transition (GO:1901990)	332	98	42.38	+	2.31	9.18E-12	1.08E-09
mitotic DNA integrity checkpoint signaling (GO:0044774)	85	25	10.85	+	2.30	6.82E-04	2.04E-02
import into nucleus (GO:0051170)	119	35	15.19	+	2.30	5.33E-05	2.27E-03
G1/S transition of mitotic cell cycle (GO:0000082)	85	25	10.85	+	2.30	6.82E-04	2.04E-02
mRNA catabolic process (GO:0006402)	126	37	16.08	+	2.30	3.06E-05	1.39E-03
positive regulation of mitotic cell cycle phase transition (GO:1901992)	92	27	11.74	+	2.30	3.79E-04	1.26E-02
positive regulation of DNA biosynthetic process (GO:2000573)	75	22	9.57	+	2.30	1.16E-03	3.15E-02
negative regulation of G1/S transition of mitotic cell cycle (GO:2000134)	75	22	9.57	+	2.30	1.16E-03	3.14E-02
protein deacylation (GO:0035601)	75	22	9.57	+	2.30	1.16E-03	3.14E-02
ribonucleoprotein complex subunit organization (GO:0071826)	209	61	26.68	+	2.29	1.08E-07	8.53E-06
positive regulation of DNA metabolic process (GO:0051054)	305	89	38.93	+	2.29	1.76E-10	1.85E-08
negative regulation of RNA catabolic process (GO:1902369)	79	23	10.08	+	2.28	1.35E-03	3.57E-02
protein-containing complex disassembly (GO:0032984)	134	39	17.10	+	2.28	2.89E-05	1.32E-03
cytoplasmic translation (GO:0002181)	124	36	15.83	+	2.27	4.66E-05	2.03E-03
ribonucleoprotein complex assembly (GO:0022618)	201	58	25.66	+	2.26	3.07E-07	2.19E-05
mitotic cell cycle (GO:0000278)	627	180	80.03	+	2.25	1.45E-19	2.64E-17
negative regulation of cell cycle process (GO:0010948)	272	78	34.72	+	2.25	3.89E-09	3.72E-07
cell cycle checkpoint signaling (GO:0000075)	157	45	20.04	+	2.25	9.11E-06	4.68E-04
regulation of G1/S transition of mitotic cell cycle (GO:2000045)	164	47	20.93	+	2.25	5.10E-06	2.76E-04
transport along microtubule (GO:0010970)	161	46	20.55	+	2.24	7.04E-06	3.70E-04
post-Golgi vesicle-mediated transport (GO:0006892)	98	28	12.51	+	2.24	5.52E-04	1.69E-02
negative regulation of protein modification by small protein conjugation or removal (GO:1903321)	95	27	12.13	+	2.23	7.74E-04	2.24E-02
mitotic DNA damage checkpoint signaling (GO:0044773)	81	23	10.34	+	2.22	1.55E-03	3.98E-02
protein localization to nucleus (GO:0034504)	194	55	24.76	+	2.22	9.53E-07	5.98E-05
signal transduction by p53 class mediator (GO:0072331)	92	26	11.74	+	2.21	7.08E-04	2.08E-02
regulation of macroautophagy (GO:0016241)	160	45	20.42	+	2.20	1.14E-05	5.78E-04
spindle assembly (GO:0051225)	96	27	12.25	+	2.20	8.11E-04	2.33E-02
positive regulation of mitotic cell cycle (GO:0045931)	121	34	15.44	+	2.20	1.69E-04	6.09E-03
double-strand break repair (GO:0006302)	203	57	25.91	+	2.20	9.10E-07	5.78E-05
regulation of stem cell differentiation (GO:2000736)	82	23	10.47	+	2.20	1.69E-03	4.20E-02
regulation of cell division (GO:0051302)	189	53	24.12	+	2.20	1.96E-06	1.15E-04
regulation of cell cycle process (GO:0010564)	715	200	91.26	+	2.19	1.23E-20	2.56E-18
positive regulation of cell cycle process (GO:0090068)	251	70	32.04	+	2.18	6.19E-08	5.03E-06
regulation of signal transduction by p53 class mediator (GO:1901796)	104	29	13.27	+	2.18	4.82E-04	1.52E-02
positive regulation of cell cycle phase transition (GO:1901989)	115	32	14.68	+	2.18	3.28E-04	1.10E-02
sister chromatid segregation (GO:0000819)	148	41	18.89	+	2.17	4.05E-05	1.80E-03
negative regulation of mitotic cell cycle (GO:0045930)	213	59	27.19	+	2.17	9.69E-07	6.05E-05
regulation of microtubule-based process (GO:0032886)	260	72	33.19	+	2.17	6.16E-08	5.03E-06
negative regulation of cell cycle phase transition (GO:1901988)	224	62	28.59	+	2.17	4.26E-07	2.94E-05
DNA biosynthetic process (GO:0071897)	98	27	12.51	+	2.16	9.19E-04	2.58E-02
cerebral cortex development (GO:0021987)	120	33	15.32	+	2.15	2.64E-04	9.06E-03
negative regulation of cell cycle G1/S phase transition (GO:1902807)	84	23	10.72	+	2.15	2.03E-03	4.94E-02
cellular response to hypoxia (GO:0071456)	128	35	16.34	+	2.14	1.64E-04	5.95E-03
regulation of cell cycle G2/M phase transition (GO:1902749)	110	30	14.04	+	2.14	6.60E-04	1.99E-02
regulation of protein modification by small protein conjugation or removal (GO:1903320)	253	69	32.29	+	2.14	1.77E-07	1.33E-05
cell division (GO:0051301)	514	140	65.61	+	2.13	6.14E-14	8.60E-12
membrane fusion (GO:0061025)	158	43	20.17	+	2.13	4.23E-05	1.87E-03
cellular response to decreased oxygen levels (GO:0036294)	136	37	17.36	+	2.13	1.45E-04	5.39E-03
RNA catabolic process (GO:0006401)	162	44	20.68	+	2.13	3.26E-05	1.47E-03
gene silencing by RNA (GO:0031047)	96	26	12.25	+	2.12	1.37E-03	3.60E-02
regulation of mRNA catabolic process (GO:0061013)	181	49	23.10	+	2.12	1.31E-05	6.56E-04
RNA metabolic process (GO:0016070)	1635	442	208.69	+	2.12	4.22E-43	5.52E-40
cellular response to leukemia inhibitory factor (GO:1990830)	93	25	11.87	+	2.11	1.88E-03	4.61E-02
regulation of RNA stability (GO:0043487)	175	47	22.34	+	2.10	2.45E-05	1.16E-03
protein acylation (GO:0043543)	195	52	24.89	+	2.09	1.03E-05	5.29E-04
response to leukemia inhibitory factor (GO:1990823)	94	25	12.00	+	2.08	2.02E-03	4.93E-02
regulation of protein dephosphorylation (GO:0035304)	94	25	12.00	+	2.08	2.02E-03	4.92E-02
non-membrane-bounded organelle assembly (GO:0140694)	316	84	40.33	+	2.08	1.69E-08	1.48E-06
regulation of cell cycle G1/S phase transition (GO:1902806)	192	51	24.51	+	2.08	1.41E-05	6.97E-04
DNA integrity checkpoint signaling (GO:0031570)	113	30	14.42	+	2.08	7.85E-04	2.27E-02
DNA geometric change (GO:0032392)	98	26	12.51	+	2.08	1.61E-03	4.03E-02
response to UV (GO:0009411)	151	40	19.27	+	2.08	1.21E-04	4.67E-03
nucleic acid metabolic process (GO:0090304)	2276	602	290.51	+	2.07	9.64E-58	1.51E-53
peptidyl-serine phosphorylation (GO:0018105)	186	49	23.74	+	2.06	2.64E-05	1.23E-03
cellular response to DNA damage stimulus (GO:0006974)	756	199	96.50	+	2.06	4.22E-18	7.44E-16
stem cell population maintenance (GO:0019827)	114	30	14.55	+	2.06	8.45E-04	2.41E-02
maintenance of cell number (GO:0098727)	118	31	15.06	+	2.06	6.74E-04	2.02E-02
regulation of cell cycle phase transition (GO:1901987)	431	113	55.01	+	2.05	1.13E-10	1.21E-08
DNA conformation change (GO:0071103)	107	28	13.66	+	2.05	1.47E-03	3.80E-02
regulation of mitotic cell cycle (GO:0007346)	493	129	62.93	+	2.05	5.79E-12	6.99E-10
ncRNA processing (GO:0034470)	413	108	52.72	+	2.05	4.34E-10	4.47E-08
cellular response to oxygen levels (GO:0071453)	153	40	19.53	+	2.05	1.38E-04	5.16E-03
positive regulation of proteasomal protein catabolic process (GO:1901800)	119	31	15.19	+	2.04	1.03E-03	2.85E-02
regulation of cell cycle (GO:0051726)	1122	292	143.21	+	2.04	9.45E-26	2.69E-23
regulation of DNA binding (GO:0051101)	124	32	15.83	+	2.02	8.31E-04	2.37E-02
DNA-templated transcription (GO:0006351)	613	158	78.24	+	2.02	6.65E-14	9.23E-12
regulation of mRNA stability (GO:0043488)	163	42	20.81	+	2.02	1.36E-04	5.15E-03
nucleic acid-templated transcription (GO:0097659)	614	158	78.37	+	2.02	7.12E-14	9.70E-12
positive regulation of protein modification by small protein conjugation or removal (GO:1903322)	140	36	17.87	+	2.01	4.43E-04	1.44E-02
RNA biosynthetic process (GO:0032774)	624	160	79.65	+	2.01	6.78E-14	9.33E-12
negative regulation of cell cycle (GO:0045786)	359	92	45.82	+	2.01	1.84E-08	1.61E-06
establishment of organelle localization (GO:0051656)	379	97	48.38	+	2.01	7.73E-09	7.25E-07
regulation of protein ubiquitination (GO:0031396)	211	54	26.93	+	2.01	2.14E-05	1.02E-03
organelle localization (GO:0051640)	513	131	65.48	+	2.00	1.97E-11	2.27E-09
cell cycle process (GO:0022402)	841	214	107.35	+	1.99	7.01E-18	1.18E-15
chromosome segregation (GO:0007059)	291	74	37.14	+	1.99	6.46E-07	4.24E-05
positive regulation of mRNA metabolic process (GO:1903313)	122	31	15.57	+	1.99	1.20E-03	3.21E-02
DNA repair (GO:0006281)	508	129	64.84	+	1.99	3.75E-11	4.17E-09
macromolecule methylation (GO:0043414)	280	71	35.74	+	1.99	1.01E-06	6.26E-05
nucleobase-containing compound transport (GO:0015931)	225	57	28.72	+	1.98	1.63E-05	7.92E-04
negative regulation of nucleobase-containing compound metabolic process (GO:0045934)	1562	395	199.38	+	1.98	7.56E-33	4.24E-30
positive regulation of cell cycle (GO:0045787)	353	89	45.06	+	1.98	5.33E-08	4.40E-06
regulation of transforming growth factor beta receptor signaling pathway (GO:0017015)	139	35	17.74	+	1.97	6.72E-04	2.02E-02
negative regulation of transferase activity (GO:0051348)	275	69	35.10	+	1.97	1.93E-06	1.14E-04
cell cycle (GO:0007049)	1249	313	159.42	+	1.96	2.97E-25	8.03E-23
response to ionizing radiation (GO:0010212)	144	36	18.38	+	1.96	8.06E-04	2.31E-02
ncRNA metabolic process (GO:0034660)	536	134	68.42	+	1.96	3.37E-11	3.77E-09
regulation of autophagy (GO:0010506)	345	86	44.04	+	1.95	1.36E-07	1.04E-05
in utero embryonic development (GO:0001701)	395	98	50.42	+	1.94	2.26E-08	1.95E-06
positive regulation of protein ubiquitination (GO:0031398)	121	30	15.44	+	1.94	1.85E-03	4.56E-02
DNA metabolic process (GO:0006259)	794	196	101.35	+	1.93	2.15E-15	3.24E-13
positive regulation of translation (GO:0045727)	146	36	18.64	+	1.93	8.69E-04	2.47E-02
regulation of cellular response to transforming growth factor beta stimulus (GO:1903844)	142	35	18.13	+	1.93	1.13E-03	3.07E-02
negative regulation of DNA-templated transcription (GO:0045892)	1323	326	168.87	+	1.93	3.57E-25	9.49E-23
negative regulation of protein kinase activity (GO:0006469)	207	51	26.42	+	1.93	6.59E-05	2.75E-03
cytoskeleton-dependent intracellular transport (GO:0030705)	199	49	25.40	+	1.93	1.07E-04	4.20E-03
negative regulation of nucleic acid-templated transcription (GO:1903507)	1325	326	169.12	+	1.93	3.83E-25	1.00E-22
negative regulation of RNA biosynthetic process (GO:1902679)	1327	326	169.38	+	1.92	4.24E-25	1.09E-22
negative regulation of RNA metabolic process (GO:0051253)	1435	352	183.16	+	1.92	4.72E-27	1.48E-24
negative regulation of protein-containing complex assembly (GO:0031333)	143	35	18.25	+	1.92	1.17E-03	3.15E-02
signal transduction in response to DNA damage (GO:0042770)	135	33	17.23	+	1.92	1.38E-03	3.63E-02
regulation of dephosphorylation (GO:0035303)	135	33	17.23	+	1.92	1.38E-03	3.63E-02
regulation of organelle assembly (GO:1902115)	209	51	26.68	+	1.91	1.03E-04	4.07E-03
protein stabilization (GO:0050821)	218	53	27.83	+	1.90	6.55E-05	2.75E-03
positive regulation of cellular amide metabolic process (GO:0034250)	173	42	22.08	+	1.90	4.62E-04	1.48E-02
peptidyl-serine modification (GO:0018209)	206	50	26.29	+	1.90	1.37E-04	5.15E-03
microtubule-based transport (GO:0099111)	203	49	25.91	+	1.89	1.84E-04	6.57E-03
negative regulation of organelle organization (GO:0010639)	345	83	44.04	+	1.88	9.45E-07	5.97E-05
regulation of cellular response to stress (GO:0080135)	709	170	90.50	+	1.88	1.52E-12	1.89E-10
positive regulation of Wnt signaling pathway (GO:0030177)	142	34	18.13	+	1.88	1.72E-03	4.28E-02
post-transcriptional regulation of gene expression (GO:0010608)	498	119	63.57	+	1.87	4.81E-09	4.57E-07
negative regulation of macromolecule biosynthetic process (GO:0010558)	1533	366	195.67	+	1.87	3.58E-26	1.06E-23
negative regulation of kinase activity (GO:0033673)	231	55	29.49	+	1.87	9.99E-05	3.98E-03
microtubule cytoskeleton organization (GO:0000226)	547	130	69.82	+	1.86	1.14E-09	1.13E-07
negative regulation of cellular biosynthetic process (GO:0031327)	1594	378	203.46	+	1.86	1.04E-26	3.21E-24
positive regulation of protein-containing complex assembly (GO:0031334)	194	46	24.76	+	1.86	3.09E-04	1.05E-02
negative regulation of cellular catabolic process (GO:0031330)	242	57	30.89	+	1.85	7.02E-05	2.92E-03
nuclear division (GO:0000280)	323	76	41.23	+	1.84	4.71E-06	2.58E-04
nuclear chromosome segregation (GO:0098813)	234	55	29.87	+	1.84	1.10E-04	4.31E-03
positive regulation of nucleic acid-templated transcription (GO:1903508)	1715	403	218.90	+	1.84	7.51E-28	2.68E-25
positive regulation of DNA-templated transcription (GO:0045893)	1715	403	218.90	+	1.84	7.51E-28	2.62E-25
positive regulation of RNA metabolic process (GO:0051254)	1848	434	235.88	+	1.84	4.67E-30	2.09E-27
positive regulation of RNA biosynthetic process (GO:1902680)	1721	404	219.67	+	1.84	8.86E-28	3.02E-25
positive regulation of macromolecule biosynthetic process (GO:0010557)	1943	455	248.01	+	1.83	2.12E-31	1.07E-28
methylation (GO:0032259)	329	77	41.99	+	1.83	5.45E-06	2.93E-04
negative regulation of biosynthetic process (GO:0009890)	1624	379	207.29	+	1.83	1.21E-25	3.39E-23
nucleobase-containing compound metabolic process (GO:0006139)	2825	659	360.59	+	1.83	5.06E-47	1.13E-43
intrinsic apoptotic signaling pathway (GO:0097193)	163	38	20.81	+	1.83	1.56E-03	3.98E-02
negative regulation of transcription by RNA polymerase II (GO:0000122)	974	227	124.32	+	1.83	2.30E-15	3.44E-13
protein autophosphorylation (GO:0046777)	189	44	24.12	+	1.82	7.82E-04	2.26E-02
negative regulation of cellular metabolic process (GO:0031324)	2264	527	288.98	+	1.82	2.70E-36	1.76E-33
DNA recombination (GO:0006310)	245	57	31.27	+	1.82	1.07E-04	4.19E-03
negative regulation of protein modification process (GO:0031400)	503	117	64.20	+	1.82	2.46E-08	2.09E-06
positive regulation of protein catabolic process (GO:0045732)	215	50	27.44	+	1.82	2.75E-04	9.40E-03
regulation of proteasomal protein catabolic process (GO:0061136)	194	45	24.76	+	1.82	6.28E-04	1.92E-02
positive regulation of nucleobase-containing compound metabolic process (GO:0045935)	2058	476	262.69	+	1.81	7.69E-32	4.02E-29
regulation of protein stability (GO:0031647)	333	77	42.50	+	1.81	8.78E-06	4.56E-04
translation (GO:0006412)	379	87	48.38	+	1.80	2.68E-06	1.54E-04
gene expression (GO:0010467)	2314	530	295.36	+	1.79	7.46E-35	4.50E-32
regulation of organelle organization (GO:0033043)	1189	272	151.77	+	1.79	2.33E-17	3.76E-15
protein-containing complex organization (GO:0043933)	1423	325	181.63	+	1.79	1.31E-20	2.69E-18
regulation of catabolic process (GO:0009894)	987	225	125.98	+	1.79	2.76E-14	3.94E-12
regulation of cellular catabolic process (GO:0031329)	786	179	100.33	+	1.78	1.50E-11	1.75E-09
macroautophagy (GO:0016236)	189	43	24.12	+	1.78	1.13E-03	3.09E-02
protein-containing complex assembly (GO:0065003)	1270	288	162.10	+	1.78	5.75E-18	9.81E-16
positive regulation of binding (GO:0051099)	181	41	23.10	+	1.77	1.83E-03	4.53E-02
positive regulation of organelle organization (GO:0010638)	508	115	64.84	+	1.77	1.16E-07	9.00E-06
organelle fission (GO:0048285)	349	79	44.55	+	1.77	1.37E-05	6.83E-04
positive regulation of cellular biosynthetic process (GO:0031328)	2048	463	261.41	+	1.77	5.54E-29	2.23E-26
nucleobase-containing compound catabolic process (GO:0034655)	284	64	36.25	+	1.77	8.08E-05	3.31E-03
apoptotic signaling pathway (GO:0097190)	316	71	40.33	+	1.76	4.51E-05	1.97E-03
regulation of binding (GO:0051098)	374	84	47.74	+	1.76	9.39E-06	4.81E-04
heterocycle metabolic process (GO:0046483)	2999	673	382.80	+	1.76	3.17E-43	4.97E-40
regulation of protein-containing complex assembly (GO:0043254)	412	92	52.59	+	1.75	3.30E-06	1.88E-04
positive regulation of biosynthetic process (GO:0009891)	2087	465	266.39	+	1.75	6.40E-28	2.33E-25
microtubule-based process (GO:0007017)	809	180	103.26	+	1.74	7.40E-11	8.05E-09
regulation of translation (GO:0006417)	410	91	52.33	+	1.74	4.47E-06	2.46E-04
regulation of cellular amide metabolic process (GO:0034248)	469	104	59.86	+	1.74	9.48E-07	5.97E-05
endosomal transport (GO:0016197)	236	52	30.12	+	1.73	6.87E-04	2.04E-02
cellular aromatic compound metabolic process (GO:0006725)	3050	672	389.30	+	1.73	1.02E-40	1.14E-37
vesicle organization (GO:0016050)	327	72	41.74	+	1.73	6.04E-05	2.55E-03
peptidyl-amino acid modification (GO:0018193)	882	194	112.58	+	1.72	2.92E-11	3.32E-09
positive regulation of transcription by RNA polymerase II (GO:0045944)	1259	276	160.70	+	1.72	1.47E-15	2.24E-13
negative regulation of nitrogen compound metabolic process (GO:0051172)	2409	526	307.49	+	1.71	5.55E-30	2.42E-27
positive regulation of catabolic process (GO:0009896)	513	112	65.48	+	1.71	7.15E-07	4.60E-05
transcription by RNA polymerase II (GO:0006366)	356	77	45.44	+	1.69	6.09E-05	2.57E-03
protein localization to organelle (GO:0033365)	694	150	88.58	+	1.69	1.82E-08	1.60E-06
regulation of proteolysis involved in protein catabolic process (GO:1903050)	228	49	29.10	+	1.68	1.53E-03	3.93E-02
negative regulation of catabolic process (GO:0009895)	326	70	41.61	+	1.68	1.54E-04	5.67E-03
Golgi vesicle transport (GO:0048193)	290	62	37.02	+	1.67	4.65E-04	1.48E-02
regulation of nucleobase-containing compound metabolic process (GO:0019219)	4067	868	519.12	+	1.67	1.74E-50	9.08E-47
peptide biosynthetic process (GO:0043043)	408	87	52.08	+	1.67	2.89E-05	1.32E-03
regulation of cellular macromolecule biosynthetic process (GO:2000112)	493	105	62.93	+	1.67	4.22E-06	2.35E-04
regulation of protein catabolic process (GO:0042176)	367	78	46.84	+	1.67	7.95E-05	3.27E-03
regulation of canonical Wnt signaling pathway (GO:0060828)	255	54	32.55	+	1.66	1.09E-03	2.99E-02
positive regulation of cellular catabolic process (GO:0031331)	411	87	52.46	+	1.66	4.10E-05	1.82E-03
cellular component biogenesis (GO:0044085)	2633	557	336.08	+	1.66	6.99E-29	2.74E-26
autophagy (GO:0006914)	303	64	38.68	+	1.65	4.49E-04	1.45E-02
process utilizing autophagic mechanism (GO:0061919)	303	64	38.68	+	1.65	4.49E-04	1.45E-02
regulation of RNA metabolic process (GO:0051252)	3752	791	478.91	+	1.65	4.10E-43	5.84E-40
chordate embryonic development (GO:0043009)	655	138	83.60	+	1.65	2.42E-07	1.77E-05
negative regulation of macromolecule metabolic process (GO:0010605)	2764	582	352.80	+	1.65	5.75E-30	2.44E-27
proteasome-mediated ubiquitin-dependent protein catabolic process (GO:0043161)	347	73	44.29	+	1.65	1.79E-04	6.43E-03
cellular nitrogen compound metabolic process (GO:0034641)	3573	751	456.06	+	1.65	4.74E-40	4.95E-37
organic cyclic compound metabolic process (GO:1901360)	3292	691	420.19	+	1.64	4.52E-36	2.84E-33
cellular response to stress (GO:0033554)	1599	335	204.10	+	1.64	2.06E-16	3.23E-14
cytoskeleton organization (GO:0007010)	1240	259	158.27	+	1.64	1.43E-12	1.81E-10
nucleobase-containing compound biosynthetic process (GO:0034654)	1007	210	128.53	+	1.63	2.76E-10	2.89E-08
negative regulation of protein phosphorylation (GO:0001933)	322	67	41.10	+	1.63	4.82E-04	1.52E-02
negative regulation of phosphorus metabolic process (GO:0010563)	423	88	53.99	+	1.63	6.97E-05	2.91E-03
regulation of DNA-templated transcription (GO:0006355)	3454	718	440.87	+	1.63	1.36E-36	1.07E-33
regulation of Wnt signaling pathway (GO:0030111)	332	69	42.38	+	1.63	4.32E-04	1.40E-02
regulation of nucleic acid-templated transcription (GO:1903506)	3456	718	441.13	+	1.63	1.93E-36	1.38E-33
regulation of RNA biosynthetic process (GO:2001141)	3465	719	442.28	+	1.63	2.26E-36	1.54E-33
embryo development ending in birth or egg hatching (GO:0009792)	677	140	86.41	+	1.62	4.88E-07	3.31E-05
establishment of protein localization to organelle (GO:0072594)	334	69	42.63	+	1.62	4.52E-04	1.46E-02
negative regulation of phosphate metabolic process (GO:0045936)	422	87	53.86	+	1.62	9.14E-05	3.70E-03
negative regulation of metabolic process (GO:0009892)	2988	615	381.39	+	1.61	2.09E-29	8.63E-27
cellular response to abiotic stimulus (GO:0071214)	326	67	41.61	+	1.61	6.93E-04	2.05E-02
cellular response to environmental stimulus (GO:0104004)	326	67	41.61	+	1.61	6.93E-04	2.04E-02
cellular macromolecule catabolic process (GO:0044265)	785	161	100.20	+	1.61	1.04E-07	8.24E-06
regulation of macromolecule biosynthetic process (GO:0010556)	3938	806	502.65	+	1.60	6.73E-40	6.60E-37
regulation of protein serine/threonine kinase activity (GO:0071900)	391	80	49.91	+	1.60	2.21E-04	7.75E-03
positive regulation of nitrogen compound metabolic process (GO:0051173)	3174	649	405.13	+	1.60	1.36E-30	6.28E-28
regulation of cytoskeleton organization (GO:0051493)	540	110	68.93	+	1.60	1.76E-05	8.54E-04
heterocycle catabolic process (GO:0046700)	324	66	41.36	+	1.60	8.92E-04	2.52E-02
intracellular transport (GO:0046907)	1360	277	173.59	+	1.60	2.03E-12	2.49E-10
organelle organization (GO:0006996)	3026	615	386.24	+	1.59	3.60E-28	1.34E-25
heterocycle biosynthetic process (GO:0018130)	1079	219	137.72	+	1.59	7.34E-10	7.37E-08
regulation of transcription by RNA polymerase II (GO:0006357)	2606	528	332.63	+	1.59	1.57E-23	3.68E-21
regulation of protein modification process (GO:0031399)	1563	315	199.50	+	1.58	1.71E-13	2.32E-11
proteasomal protein catabolic process (GO:0010498)	378	76	48.25	+	1.58	5.41E-04	1.67E-02
cellular component assembly (GO:0022607)	2394	481	305.57	+	1.57	1.46E-20	2.90E-18
regulation of cellular component biogenesis (GO:0044087)	951	191	121.39	+	1.57	2.36E-08	2.02E-06
positive regulation of cellular metabolic process (GO:0031325)	3122	626	398.50	+	1.57	2.14E-27	7.00E-25
regulation of cellular biosynthetic process (GO:0031326)	4102	822	523.58	+	1.57	8.12E-38	7.49E-35
cellular nitrogen compound catabolic process (GO:0044270)	330	66	42.12	+	1.57	1.31E-03	3.47E-02
organelle assembly (GO:0070925)	803	160	102.50	+	1.56	5.43E-07	3.64E-05
cellular macromolecule metabolic process (GO:0044260)	2518	501	321.40	+	1.56	8.97E-21	1.90E-18
regulation of intracellular transport (GO:0032386)	342	68	43.65	+	1.56	1.21E-03	3.23E-02
regulation of biosynthetic process (GO:0009889)	4163	825	531.37	+	1.55	1.82E-36	1.36E-33
cellular component disassembly (GO:0022411)	318	63	40.59	+	1.55	1.90E-03	4.65E-02
establishment of localization in cell (GO:0051649)	1752	347	223.63	+	1.55	5.84E-14	8.25E-12
protein phosphorylation (GO:0006468)	719	142	91.77	+	1.55	3.75E-06	2.10E-04
aromatic compound biosynthetic process (GO:0019438)	1089	215	139.00	+	1.55	9.49E-09	8.81E-07
negative regulation of gene expression (GO:0010629)	902	178	115.13	+	1.55	2.13E-07	1.57E-05
negative regulation of phosphorylation (GO:0042326)	365	72	46.59	+	1.55	1.01E-03	2.83E-02
ubiquitin-dependent protein catabolic process (GO:0006511)	575	113	73.39	+	1.54	5.12E-05	2.18E-03
regulation of cellular metabolic process (GO:0031323)	5647	1107	720.79	+	1.54	6.73E-52	5.28E-48
macromolecule biosynthetic process (GO:0009059)	1487	289	189.80	+	1.52	6.44E-11	7.06E-09
regulation of nitrogen compound metabolic process (GO:0051171)	5709	1109	728.70	+	1.52	4.12E-50	1.62E-46
negative regulation of cellular component organization (GO:0051129)	690	134	88.07	+	1.52	1.50E-05	7.38E-04
response to radiation (GO:0009314)	449	87	57.31	+	1.52	5.38E-04	1.66E-02
positive regulation of macromolecule metabolic process (GO:0010604)	3542	685	452.10	+	1.52	2.18E-26	6.59E-24
regulation of cellular component organization (GO:0051128)	2364	457	301.74	+	1.51	7.35E-17	1.16E-14
positive regulation of apoptotic process (GO:0043065)	503	97	64.20	+	1.51	3.12E-04	1.05E-02
modification-dependent protein catabolic process (GO:0019941)	586	113	74.80	+	1.51	9.81E-05	3.92E-03
positive regulation of programmed cell death (GO:0043068)	516	99	65.86	+	1.50	2.91E-04	9.87E-03
cellular nitrogen compound biosynthetic process (GO:0044271)	1588	304	202.69	+	1.50	8.21E-11	8.88E-09
regulation of primary metabolic process (GO:0080090)	5872	1124	749.51	+	1.50	3.45E-48	1.08E-44
endomembrane system organization (GO:0010256)	554	106	70.71	+	1.50	2.22E-04	7.79E-03
negative regulation of intracellular signal transduction (GO:1902532)	518	99	66.12	+	1.50	3.76E-04	1.25E-02
macromolecule catabolic process (GO:0009057)	989	189	126.24	+	1.50	5.21E-07	3.52E-05
cellular component organization or biogenesis (GO:0071840)	5727	1094	731.00	+	1.50	5.84E-46	1.14E-42
macromolecule metabolic process (GO:0043170)	5941	1134	758.32	+	1.50	3.47E-48	9.07E-45
modification-dependent macromolecule catabolic process (GO:0043632)	598	114	76.33	+	1.49	1.45E-04	5.40E-03
cellular localization (GO:0051641)	2655	505	338.89	+	1.49	1.56E-17	2.55E-15
regulation of transferase activity (GO:0051338)	915	174	116.79	+	1.49	2.35E-06	1.38E-04
protein modification by small protein conjugation (GO:0032446)	753	143	96.11	+	1.49	2.02E-05	9.62E-04
regulation of growth (GO:0040008)	627	119	80.03	+	1.49	1.01E-04	4.03E-03
positive regulation of cellular component biogenesis (GO:0044089)	501	95	63.95	+	1.49	6.28E-04	1.91E-02
protein transport (GO:0015031)	1179	223	150.49	+	1.48	1.01E-07	8.10E-06
positive regulation of cellular component organization (GO:0051130)	1054	199	134.53	+	1.48	5.40E-07	3.63E-05
positive regulation of cell death (GO:0010942)	583	110	74.41	+	1.48	2.48E-04	8.61E-03
regulation of gene expression (GO:0010468)	4855	916	619.70	+	1.48	3.57E-34	2.07E-31
regulation of protein kinase activity (GO:0045859)	668	126	85.26	+	1.48	8.04E-05	3.30E-03
protein modification by small protein conjugation or removal (GO:0070647)	898	169	114.62	+	1.47	5.01E-06	2.73E-04
protein localization (GO:0008104)	1919	361	244.94	+	1.47	7.55E-12	8.96E-10
cellular macromolecule localization (GO:0070727)	1925	362	245.71	+	1.47	6.46E-12	7.73E-10
organic cyclic compound biosynthetic process (GO:1901362)	1216	227	155.21	+	1.46	1.90E-07	1.42E-05
positive regulation of metabolic process (GO:0009893)	3858	720	492.44	+	1.46	4.60E-24	1.13E-21
regulation of macromolecule metabolic process (GO:0060255)	6214	1158	793.16	+	1.46	7.27E-45	1.27E-41
positive regulation of protein localization (GO:1903829)	462	86	58.97	+	1.46	1.66E-03	4.13E-02
cellular component organization (GO:0016043)	5523	1027	704.96	+	1.46	2.39E-37	2.08E-34
establishment of protein localization (GO:0045184)	1267	235	161.72	+	1.45	1.63E-07	1.23E-05
phosphorylation (GO:0016310)	918	170	117.17	+	1.45	1.21E-05	6.11E-04
regulation of protein metabolic process (GO:0051246)	2587	479	330.21	+	1.45	1.02E-14	1.46E-12
proteolysis involved in protein catabolic process (GO:0051603)	647	119	82.58	+	1.44	3.15E-04	1.06E-02
regulation of protein localization (GO:0032880)	850	156	108.49	+	1.44	4.45E-05	1.95E-03
apoptotic process (GO:0006915)	1033	189	131.85	+	1.43	6.45E-06	3.41E-04
negative regulation of protein metabolic process (GO:0051248)	1042	190	133.00	+	1.43	7.06E-06	3.70E-04
actin filament-based process (GO:0030029)	611	111	77.99	+	1.42	8.06E-04	2.32E-02
macromolecule localization (GO:0033036)	2345	426	299.32	+	1.42	5.57E-12	6.77E-10
regulation of metabolic process (GO:0019222)	6754	1224	862.09	+	1.42	7.18E-43	8.66E-40
protein catabolic process (GO:0030163)	756	137	96.50	+	1.42	1.96E-04	6.95E-03
negative regulation of cellular process (GO:0048523)	4732	855	604.00	+	1.42	1.33E-25	3.65E-23
intracellular signal transduction (GO:0035556)	1511	273	192.87	+	1.42	1.14E-07	8.86E-06
positive regulation of protein metabolic process (GO:0051247)	1515	273	193.38	+	1.41	1.45E-07	1.10E-05
regulation of cellular localization (GO:0060341)	962	173	122.79	+	1.41	4.24E-05	1.87E-03
protein ubiquitination (GO:0016567)	684	123	87.31	+	1.41	5.49E-04	1.69E-02
intracellular protein transport (GO:0006886)	682	122	87.05	+	1.40	8.03E-04	2.32E-02
embryo development (GO:0009790)	1059	189	135.17	+	1.40	2.31E-05	1.10E-03
negative regulation of signal transduction (GO:0009968)	1257	224	160.44	+	1.40	4.45E-06	2.46E-04
programmed cell death (GO:0012501)	1074	191	137.09	+	1.39	2.59E-05	1.21E-03
cell death (GO:0008219)	1108	197	141.43	+	1.39	1.87E-05	8.99E-04
nitrogen compound metabolic process (GO:0006807)	6710	1192	856.47	+	1.39	2.79E-37	2.30E-34
macromolecule modification (GO:0043412)	2883	512	367.99	+	1.39	4.81E-13	6.29E-11
head development (GO:0060322)	823	146	105.05	+	1.39	2.81E-04	9.59E-03
regulation of response to stress (GO:0080134)	1373	243	175.25	+	1.39	2.70E-06	1.55E-04
brain development (GO:0007420)	775	137	98.92	+	1.38	5.15E-04	1.61E-02
regulation of kinase activity (GO:0043549)	783	138	99.94	+	1.38	5.48E-04	1.69E-02
protein modification process (GO:0036211)	2658	467	339.27	+	1.38	3.29E-11	3.71E-09
positive regulation of protein modification process (GO:0031401)	1019	178	130.07	+	1.37	1.19E-04	4.59E-03
negative regulation of biological process (GO:0048519)	5314	925	678.28	+	1.36	2.23E-23	5.06E-21
cellular metabolic process (GO:0044237)	6606	1147	843.20	+	1.36	3.36E-31	1.65E-28
nitrogen compound transport (GO:0071705)	1589	275	202.82	+	1.36	2.62E-06	1.52E-04
response to abiotic stimulus (GO:0009628)	1121	192	143.09	+	1.34	1.62E-04	5.91E-03
central nervous system development (GO:0007417)	1034	177	131.98	+	1.34	3.26E-04	1.09E-02
primary metabolic process (GO:0044238)	7228	1236	922.59	+	1.34	4.25E-32	2.30E-29
regulation of programmed cell death (GO:0043067)	1498	255	191.21	+	1.33	1.86E-05	8.94E-04
regulation of apoptotic process (GO:0042981)	1468	249	187.38	+	1.33	2.66E-05	1.24E-03
regulation of cell death (GO:0010941)	1654	279	211.12	+	1.32	1.32E-05	6.61E-04
negative regulation of cell communication (GO:0010648)	1357	228	173.21	+	1.32	1.10E-04	4.32E-03
negative regulation of signaling (GO:0023057)	1363	229	173.97	+	1.32	1.14E-04	4.41E-03
positive regulation of cellular process (GO:0048522)	5670	951	723.72	+	1.31	1.30E-19	2.43E-17
regulation of intracellular signal transduction (GO:1902531)	1721	288	219.67	+	1.31	1.58E-05	7.70E-04
protein metabolic process (GO:0019538)	3920	650	500.35	+	1.30	1.66E-11	1.93E-09
organic substance metabolic process (GO:0071704)	7697	1273	982.45	+	1.30	2.25E-27	7.19E-25
positive regulation of biological process (GO:0048518)	6304	1042	804.65	+	1.29	3.00E-20	5.88E-18
positive regulation of developmental process (GO:0051094)	1339	220	170.91	+	1.29	4.99E-04	1.57E-02
regulation of cell differentiation (GO:0045595)	1581	259	201.80	+	1.28	1.68E-04	6.05E-03
regulation of developmental process (GO:0050793)	2489	407	317.70	+	1.28	1.34E-06	8.11E-05
negative regulation of molecular function (GO:0044092)	1150	188	146.79	+	1.28	1.58E-03	4.02E-02
metabolic process (GO:0008152)	8131	1323	1037.85	+	1.27	4.09E-26	1.19E-23
regulation of phosphate metabolic process (GO:0019220)	1404	228	179.21	+	1.27	6.55E-04	1.98E-02
regulation of phosphorus metabolic process (GO:0051174)	1405	228	179.34	+	1.27	6.59E-04	1.99E-02
regulation of phosphorylation (GO:0042325)	1248	202	159.30	+	1.27	1.53E-03	3.93E-02
regulation of molecular function (GO:0065009)	3094	495	394.92	+	1.25	6.95E-07	4.51E-05
regulation of signal transduction (GO:0009966)	2989	478	381.52	+	1.25	1.18E-06	7.22E-05
negative regulation of response to stimulus (GO:0048585)	1620	257	206.78	+	1.24	9.38E-04	2.62E-02
regulation of catalytic activity (GO:0050790)	2373	370	302.89	+	1.22	1.95E-04	6.94E-03
regulation of cell communication (GO:0010646)	3369	522	430.02	+	1.21	8.99E-06	4.64E-04
regulation of signaling (GO:0023051)	3381	523	431.55	+	1.21	1.05E-05	5.34E-04
regulation of response to stimulus (GO:0048583)	4034	614	514.90	+	1.19	7.45E-06	3.89E-04
cellular biosynthetic process (GO:0044249)	2464	374	314.51	+	1.19	1.12E-03	3.06E-02
cellular developmental process (GO:0048869)	3542	528	452.10	+	1.17	3.21E-04	1.08E-02
regulation of cellular process (GO:0050794)	11187	1661	1427.92	+	1.16	4.66E-18	8.11E-16
developmental process (GO:0032502)	5677	841	724.62	+	1.16	2.54E-06	1.48E-04
cell differentiation (GO:0030154)	3519	521	449.17	+	1.16	6.34E-04	1.93E-02
organonitrogen compound metabolic process (GO:1901564)	5013	742	639.86	+	1.16	1.74E-05	8.46E-04
multicellular organism development (GO:0007275)	4228	625	539.67	+	1.16	1.46E-04	5.41E-03
regulation of biological process (GO:0050789)	11806	1737	1506.93	+	1.15	5.17E-18	8.91E-16
anatomical structure development (GO:0048856)	5144	754	656.59	+	1.15	4.71E-05	2.04E-03
localization (GO:0051179)	4566	663	582.81	+	1.14	5.15E-04	1.61E-02
system development (GO:0048731)	3838	557	489.89	+	1.14	1.97E-03	4.82E-02
cellular process (GO:0009987)	15044	2170	1920.23	+	1.13	1.94E-27	6.46E-25
biological regulation (GO:0065007)	12544	1807	1601.13	+	1.13	3.91E-15	5.68E-13
biological_process (GO:0008150)	17864	2438	2280.18	+	1.07	1.40E-20	2.81E-18
response to external stimulus (GO:0009605)	2469	257	315.15	-	.82	8.12E-04	2.32E-02
immune system process (GO:0002376)	2429	251	310.04	-	.81	5.86E-04	1.79E-02
cell surface receptor signaling pathway (GO:0007166)	2174	218	277.49	-	.79	2.63E-04	9.05E-03
defense response (GO:0006952)	1478	144	188.65	-	.76	1.14E-03	3.09E-02
small molecule metabolic process (GO:0044281)	1654	155	211.12	-	.73	7.94E-05	3.28E-03
cell adhesion (GO:0007155)	969	89	123.68	-	.72	1.74E-03	4.31E-02
carbohydrate derivative metabolic process (GO:1901135)	1005	86	128.28	-	.67	1.58E-04	5.79E-03
cellular lipid metabolic process (GO:0044255)	928	79	118.45	-	.67	2.43E-04	8.48E-03
system process (GO:0003008)	2079	169	265.37	-	.64	4.02E-10	4.18E-08
ion transmembrane transport (GO:0034220)	891	71	113.73	-	.62	3.87E-05	1.74E-03
lipid metabolic process (GO:0006629)	1234	97	157.51	-	.62	5.57E-07	3.72E-05
ion transport (GO:0006811)	1202	93	153.42	-	.61	3.95E-07	2.76E-05
locomotion (GO:0040011)	539	41	68.80	-	.60	6.85E-04	2.04E-02
regulation of hormone levels (GO:0010817)	528	40	67.39	-	.59	7.66E-04	2.22E-02
immune response (GO:0006955)	1621	119	206.91	-	.58	9.27E-11	9.95E-09
transmembrane transport (GO:0055085)	1225	89	156.36	-	.57	1.43E-08	1.28E-06
organic hydroxy compound metabolic process (GO:1901615)	485	34	61.91	-	.55	2.58E-04	8.92E-03
Unclassified (UNCLASSIFIED)	2725	190	347.82	-	.55	1.40E-20	2.85E-18
chemotaxis (GO:0006935)	518	36	66.12	-	.54	1.36E-04	5.15E-03
taxis (GO:0042330)	520	36	66.37	-	.54	1.37E-04	5.14E-03
nervous system process (GO:0050877)	1465	95	186.99	-	.51	4.50E-13	5.93E-11
carbohydrate derivative biosynthetic process (GO:1901137)	599	37	76.46	-	.48	2.29E-06	1.34E-04
defense response to bacterium (GO:0042742)	376	23	47.99	-	.48	1.68E-04	6.06E-03
lymphocyte mediated immunity (GO:0002449)	257	15	32.80	-	.46	1.39E-03	3.65E-02
glycoprotein metabolic process (GO:0009100)	346	20	44.16	-	.45	1.63E-04	5.93E-03
steroid metabolic process (GO:0008202)	261	15	33.31	-	.45	1.07E-03	2.95E-02
external encapsulating structure organization (GO:0045229)	283	16	36.12	-	.44	4.53E-04	1.45E-02
anion transport (GO:0006820)	446	25	56.93	-	.44	8.85E-06	4.58E-04
sulfur compound metabolic process (GO:0006790)	330	18	42.12	-	.43	1.10E-04	4.29E-03
extracellular matrix organization (GO:0030198)	280	15	35.74	-	.42	2.80E-04	9.55E-03
extracellular structure organization (GO:0043062)	281	15	35.87	-	.42	2.82E-04	9.61E-03
adaptive immune response (GO:0002250)	659	33	84.12	-	.39	1.21E-09	1.19E-07
positive regulation of cytosolic calcium ion concentration (GO:0007204)	204	10	26.04	-	.38	1.04E-03	2.87E-02
organic acid transport (GO:0015849)	272	13	34.72	-	.37	9.79E-05	3.93E-03
glycoprotein biosynthetic process (GO:0009101)	277	13	35.36	-	.37	5.36E-05	2.27E-03
humoral immune response (GO:0006959)	339	15	43.27	-	.35	3.88E-06	2.17E-04
cell recognition (GO:0008037)	230	10	29.36	-	.34	1.30E-04	4.95E-03
organic anion transport (GO:0015711)	327	14	41.74	-	.34	2.71E-06	1.55E-04
protein glycosylation (GO:0006486)	220	9	28.08	-	.32	9.26E-05	3.74E-03
macromolecule glycosylation (GO:0043413)	220	9	28.08	-	.32	9.26E-05	3.73E-03
sensory perception (GO:0007600)	997	40	127.26	-	.31	2.39E-18	4.25E-16
G protein-coupled receptor signaling pathway (GO:0007186)	1223	46	156.10	-	.29	6.90E-24	1.64E-21
detoxification (GO:0098754)	136	5	17.36	-	.29	1.87E-03	4.60E-02
carboxylic acid transport (GO:0046942)	245	9	31.27	-	.29	1.41E-05	6.99E-04
myeloid leukocyte migration (GO:0097529)	139	5	17.74	-	.28	1.33E-03	3.54E-02
complement activation (GO:0006956)	140	5	17.87	-	.28	1.36E-03	3.60E-02
cell killing (GO:0001906)	129	4	16.47	-	.24	8.53E-04	2.42E-02
antimicrobial humoral response (GO:0019730)	144	4	18.38	-	.22	2.15E-04	7.57E-03
cellular detoxification (GO:1990748)	108	3	13.79	-	.22	1.47E-03	3.81E-02
detection of stimulus (GO:0051606)	686	19	87.56	-	.22	1.32E-17	2.18E-15
regulation of postsynaptic membrane potential (GO:0060078)	109	3	13.91	-	.22	1.47E-03	3.80E-02
long-chain fatty acid metabolic process (GO:0001676)	111	3	14.17	-	.21	1.53E-03	3.92E-02
neuropeptide signaling pathway (GO:0007218)	113	3	14.42	-	.21	1.04E-03	2.87E-02
complement activation, classical pathway (GO:0006958)	121	3	15.44	-	.19	5.16E-04	1.61E-02
humoral immune response mediated by circulating immunoglobulin (GO:0002455)	125	3	15.96	-	.19	3.64E-04	1.21E-02
hormone metabolic process (GO:0042445)	209	4	26.68	-	.15	3.29E-07	2.33E-05
phagocytosis, recognition (GO:0006910)	107	2	13.66	-	.15	3.88E-04	1.28E-02
cellular hormone metabolic process (GO:0034754)	132	2	16.85	-	.12	2.77E-05	1.28E-03
olefinic compound metabolic process (GO:0120254)	148	2	18.89	-	.11	6.27E-06	3.32E-04
detection of chemical stimulus (GO:0009593)	526	7	67.14	-	.10	2.81E-19	5.06E-17
cellular oxidant detoxification (GO:0098869)	93	1	11.87	-	.08	2.53E-04	8.77E-03
phospholipase C-activating G protein-coupled receptor signaling pathway (GO:0007200)	101	1	12.89	-	.08	1.16E-04	4.49E-03
monocarboxylic acid transport (GO:0015718)	101	1	12.89	-	.08	1.16E-04	4.48E-03
detection of stimulus involved in sensory perception (GO:0050906)	560	5	71.48	-	.07	5.29E-23	1.15E-20
sensory perception of chemical stimulus (GO:0007606)	551	3	70.33	-	.04	6.98E-25	1.76E-22
detection of chemical stimulus involved in sensory perception (GO:0050907)	489	2	62.42	-	.03	4.53E-23	1.00E-20
sensory perception of smell (GO:0007608)	470	1	59.99	-	.02	1.79E-23	4.13E-21
arachidonic acid metabolic process (GO:0019369)	58	0	7.40	-	< 0.01	1.46E-03	3.80E-02
xenobiotic metabolic process (GO:0006805)	117	0	14.93	-	< 0.01	1.21E-06	7.38E-05
detection of chemical stimulus involved in sensory perception of smell (GO:0050911)	443	0	56.54	-	< 0.01	6.60E-24	1.59E-21
defense response to fungus (GO:0050832)	58	0	7.40	-	< 0.01	1.46E-03	3.80E-02

## Sheet: Common
GO terms identified among yeast N terminally disordered proteins	Color codes of functionally related GOs	GO terms identified among human N terminally disordered proteins
	Translation
aromatic compound biosynthetic process (GO:0019438)	DNA damage response	aromatic compound biosynthetic process (GO:0019438)
biological regulation (GO:0065007)	Cytoskeleton	biological regulation (GO:0065007)
biological_process (GO:0008150)	Transport	biological_process (GO:0008150)
cell cycle (GO:0007049)	Transcription	cell cycle (GO:0007049)
cell cycle checkpoint signaling (GO:0000075)	Stress Response	cell cycle checkpoint signaling (GO:0000075)
cell cycle process (GO:0022402)	Decay	cell cycle process (GO:0022402)
cell division (GO:0051301)	Assembly	cell division (GO:0051301)
cellular aromatic compound metabolic process (GO:0006725)	Mitochondria	cellular aromatic compound metabolic process (GO:0006725)
cellular biosynthetic process (GO:0044249)	Spliceing	cellular biosynthetic process (GO:0044249)
cellular component assembly (GO:0022607)	Autophagy	cellular component assembly (GO:0022607)
cellular component biogenesis (GO:0044085)		cellular component biogenesis (GO:0044085)
cellular component organization (GO:0016043)		cellular component organization (GO:0016043)
cellular component organization or biogenesis (GO:0071840)		cellular component organization or biogenesis (GO:0071840)
cellular lipid metabolic process (GO:0044255)		cellular lipid metabolic process (GO:0044255)
cellular localization (GO:0051641)		cellular localization (GO:0051641)
cellular macromolecule catabolic process (GO:0044265)		cellular macromolecule catabolic process (GO:0044265)
cellular macromolecule localization (GO:0070727)		cellular macromolecule localization (GO:0070727)
cellular macromolecule metabolic process (GO:0044260)		cellular macromolecule metabolic process (GO:0044260)
cellular metabolic process (GO:0044237)		cellular metabolic process (GO:0044237)
cellular nitrogen compound biosynthetic process (GO:0044271)		cellular nitrogen compound biosynthetic process (GO:0044271)
cellular nitrogen compound catabolic process (GO:0044270)		cellular nitrogen compound catabolic process (GO:0044270)
cellular nitrogen compound metabolic process (GO:0034641)		cellular nitrogen compound metabolic process (GO:0034641)
cellular process (GO:0009987)		cellular process (GO:0009987)
cellular response to DNA damage stimulus (GO:0006974)		cellular response to DNA damage stimulus (GO:0006974)
cellular response to stress (GO:0033554)		cellular response to stress (GO:0033554)
chromatin organization (GO:0006325)		chromatin organization (GO:0006325)
chromatin remodeling (GO:0006338)		chromatin remodeling (GO:0006338)
chromosome organization (GO:0051276)		chromosome organization (GO:0051276)
chromosome segregation (GO:0007059)		chromosome segregation (GO:0007059)
constitutive heterochromatin formation (GO:0140719)		constitutive heterochromatin formation (GO:0140719)
cytoplasmic translation (GO:0002181)		cytoplasmic translation (GO:0002181)
DNA metabolic process (GO:0006259)		DNA metabolic process (GO:0006259)
DNA repair (GO:0006281)		DNA repair (GO:0006281)
DNA replication (GO:0006260)		DNA replication (GO:0006260)
DNA-templated DNA replication (GO:0006261)		DNA-templated DNA replication (GO:0006261)
DNA-templated transcription (GO:0006351)		DNA-templated transcription (GO:0006351)
DNA-templated transcription elongation (GO:0006354)		DNA-templated transcription elongation (GO:0006354)
double-strand break repair (GO:0006302)		double-strand break repair (GO:0006302)
epigenetic regulation of gene expression (GO:0040029)		epigenetic regulation of gene expression (GO:0040029)
establishment of localization in cell (GO:0051649)		establishment of localization in cell (GO:0051649)
establishment of organelle localization (GO:0051656)		establishment of organelle localization (GO:0051656)
establishment of protein localization (GO:0045184)		establishment of protein localization (GO:0045184)
establishment of protein localization to organelle (GO:0072594)		establishment of protein localization to organelle (GO:0072594)
establishment of RNA localization (GO:0051236)		establishment of RNA localization (GO:0051236)
gene expression (GO:0010467)		gene expression (GO:0010467)
heterochromatin formation (GO:0031507)		heterochromatin formation (GO:0031507)
heterochromatin organization (GO:0070828)		heterochromatin organization (GO:0070828)
heterocycle biosynthetic process (GO:0018130)		heterocycle biosynthetic process (GO:0018130)
heterocycle catabolic process (GO:0046700)		heterocycle catabolic process (GO:0046700)
heterocycle metabolic process (GO:0046483)		heterocycle metabolic process (GO:0046483)
histone acetylation (GO:0016573)		histone acetylation (GO:0016573)
histone modification (GO:0016570)		histone modification (GO:0016570)
import into nucleus (GO:0051170)		import into nucleus (GO:0051170)
internal peptidyl-lysine acetylation (GO:0018393)		internal peptidyl-lysine acetylation (GO:0018393)
internal protein amino acid acetylation (GO:0006475)		internal protein amino acid acetylation (GO:0006475)
intracellular protein transport (GO:0006886)		intracellular protein transport (GO:0006886)
intracellular signal transduction (GO:0035556)		intracellular signal transduction (GO:0035556)
intracellular transport (GO:0046907)		intracellular transport (GO:0046907)
ion transmembrane transport (GO:0034220)		ion transmembrane transport (GO:0034220)
ion transport (GO:0006811)		ion transport (GO:0006811)
lipid metabolic process (GO:0006629)		lipid metabolic process (GO:0006629)
localization (GO:0051179)		localization (GO:0051179)
macromolecule biosynthetic process (GO:0009059)		macromolecule biosynthetic process (GO:0009059)
macromolecule catabolic process (GO:0009057)		macromolecule catabolic process (GO:0009057)
macromolecule localization (GO:0033036)		macromolecule localization (GO:0033036)
macromolecule metabolic process (GO:0043170)		macromolecule metabolic process (GO:0043170)
macromolecule modification (GO:0043412)		macromolecule modification (GO:0043412)
maturation of LSU-rRNA (GO:0000470)		maturation of LSU-rRNA (GO:0000470)
metabolic process (GO:0008152)		metabolic process (GO:0008152)
mitotic cell cycle (GO:0000278)		mitotic cell cycle (GO:0000278)
mitotic cell cycle checkpoint signaling (GO:0007093)		mitotic cell cycle checkpoint signaling (GO:0007093)
mitotic cell cycle process (GO:1903047)		mitotic cell cycle process (GO:1903047)
mRNA catabolic process (GO:0006402)		mRNA catabolic process (GO:0006402)
mRNA export from nucleus (GO:0006406)		mRNA export from nucleus (GO:0006406)
mRNA metabolic process (GO:0016071)		mRNA metabolic process (GO:0016071)
mRNA processing (GO:0006397)		mRNA processing (GO:0006397)
mRNA splicing, via spliceosome (GO:0000398)		mRNA splicing, via spliceosome (GO:0000398)
mRNA transport (GO:0051028)		mRNA transport (GO:0051028)
ncRNA metabolic process (GO:0034660)		ncRNA metabolic process (GO:0034660)
ncRNA processing (GO:0034470)		ncRNA processing (GO:0034470)
negative regulation of biological process (GO:0048519)		negative regulation of biological process (GO:0048519)
negative regulation of biosynthetic process (GO:0009890)		negative regulation of biosynthetic process (GO:0009890)
negative regulation of cell cycle (GO:0045786)		negative regulation of cell cycle (GO:0045786)
negative regulation of cell cycle phase transition (GO:1901988)		negative regulation of cell cycle phase transition (GO:1901988)
negative regulation of cell cycle process (GO:0010948)		negative regulation of cell cycle process (GO:0010948)
negative regulation of cellular biosynthetic process (GO:0031327)		negative regulation of cellular biosynthetic process (GO:0031327)
negative regulation of cellular component organization (GO:0051129)		negative regulation of cellular component organization (GO:0051129)
negative regulation of cellular metabolic process (GO:0031324)		negative regulation of cellular metabolic process (GO:0031324)
negative regulation of cellular process (GO:0048523)		negative regulation of cellular process (GO:0048523)
negative regulation of DNA-templated transcription (GO:0045892)		negative regulation of DNA-templated transcription (GO:0045892)
negative regulation of gene expression (GO:0010629)		negative regulation of gene expression (GO:0010629)
negative regulation of gene expression, epigenetic (GO:0045814)		negative regulation of gene expression, epigenetic (GO:0045814)
negative regulation of macromolecule biosynthetic process (GO:0010558)		negative regulation of macromolecule biosynthetic process (GO:0010558)
negative regulation of macromolecule metabolic process (GO:0010605)		negative regulation of macromolecule metabolic process (GO:0010605)
negative regulation of metabolic process (GO:0009892)		negative regulation of metabolic process (GO:0009892)
negative regulation of mitotic cell cycle (GO:0045930)		negative regulation of mitotic cell cycle (GO:0045930)
negative regulation of mitotic cell cycle phase transition (GO:1901991)		negative regulation of mitotic cell cycle phase transition (GO:1901991)
negative regulation of molecular function (GO:0044092)		negative regulation of molecular function (GO:0044092)
negative regulation of nitrogen compound metabolic process (GO:0051172)		negative regulation of nitrogen compound metabolic process (GO:0051172)
negative regulation of nucleic acid-templated transcription (GO:1903507)		negative regulation of nucleic acid-templated transcription (GO:1903507)
negative regulation of nucleobase-containing compound metabolic process (GO:0045934)		negative regulation of nucleobase-containing compound metabolic process (GO:0045934)
negative regulation of protein metabolic process (GO:0051248)		negative regulation of protein metabolic process (GO:0051248)
negative regulation of RNA biosynthetic process (GO:1902679)		negative regulation of RNA biosynthetic process (GO:1902679)
negative regulation of RNA metabolic process (GO:0051253)		negative regulation of RNA metabolic process (GO:0051253)
negative regulation of transcription by RNA polymerase II (GO:0000122)		negative regulation of transcription by RNA polymerase II (GO:0000122)
nitrogen compound metabolic process (GO:0006807)		nitrogen compound metabolic process (GO:0006807)
nitrogen compound transport (GO:0071705)		nitrogen compound transport (GO:0071705)
non-membrane-bounded organelle assembly (GO:0140694)		non-membrane-bounded organelle assembly (GO:0140694)
nuclear chromosome segregation (GO:0098813)		nuclear chromosome segregation (GO:0098813)
nuclear division (GO:0000280)		nuclear division (GO:0000280)
nuclear export (GO:0051168)		nuclear export (GO:0051168)
nuclear transport (GO:0051169)		nuclear transport (GO:0051169)
nuclear-transcribed mRNA catabolic process (GO:0000956)		nuclear-transcribed mRNA catabolic process (GO:0000956)
nucleic acid metabolic process (GO:0090304)		nucleic acid metabolic process (GO:0090304)
nucleic acid transport (GO:0050657)		nucleic acid transport (GO:0050657)
nucleic acid-templated transcription (GO:0097659)		nucleic acid-templated transcription (GO:0097659)
nucleobase-containing compound biosynthetic process (GO:0034654)		nucleobase-containing compound biosynthetic process (GO:0034654)
nucleobase-containing compound catabolic process (GO:0034655)		nucleobase-containing compound catabolic process (GO:0034655)
nucleobase-containing compound metabolic process (GO:0006139)		nucleobase-containing compound metabolic process (GO:0006139)
nucleobase-containing compound transport (GO:0015931)		nucleobase-containing compound transport (GO:0015931)
nucleocytoplasmic transport (GO:0006913)		nucleocytoplasmic transport (GO:0006913)
nucleosome assembly (GO:0006334)		nucleosome assembly (GO:0006334)
nucleosome organization (GO:0034728)		nucleosome organization (GO:0034728)
organelle assembly (GO:0070925)		organelle assembly (GO:0070925)
organelle localization (GO:0051640)		organelle localization (GO:0051640)
organelle organization (GO:0006996)		organelle organization (GO:0006996)
organic acid transport (GO:0015849)		organic acid transport (GO:0015849)
organic cyclic compound metabolic process (GO:1901360)		organic cyclic compound metabolic process (GO:1901360)
organic hydroxy compound metabolic process (GO:1901615)		organic hydroxy compound metabolic process (GO:1901615)
organic substance metabolic process (GO:0071704)		organic substance metabolic process (GO:0071704)
organonitrogen compound metabolic process (GO:1901564)		organonitrogen compound metabolic process (GO:1901564)
peptide biosynthetic process (GO:0043043)		peptide biosynthetic process (GO:0043043)
peptidyl-lysine acetylation (GO:0018394)		peptidyl-lysine acetylation (GO:0018394)
peptidyl-lysine modification (GO:0018205)		peptidyl-lysine modification (GO:0018205)
positive regulation of biological process (GO:0048518)		positive regulation of biological process (GO:0048518)
positive regulation of biosynthetic process (GO:0009891)		positive regulation of biosynthetic process (GO:0009891)
positive regulation of catabolic process (GO:0009896)		positive regulation of catabolic process (GO:0009896)
positive regulation of cellular biosynthetic process (GO:0031328)		positive regulation of cellular biosynthetic process (GO:0031328)
positive regulation of cellular catabolic process (GO:0031331)		positive regulation of cellular catabolic process (GO:0031331)
positive regulation of cellular component biogenesis (GO:0044089)		positive regulation of cellular component biogenesis (GO:0044089)
positive regulation of cellular component organization (GO:0051130)		positive regulation of cellular component organization (GO:0051130)
positive regulation of cellular metabolic process (GO:0031325)		positive regulation of cellular metabolic process (GO:0031325)
positive regulation of cellular process (GO:0048522)		positive regulation of cellular process (GO:0048522)
positive regulation of DNA-templated transcription (GO:0045893)		positive regulation of DNA-templated transcription (GO:0045893)
positive regulation of DNA-templated transcription, elongation (GO:0032786)		positive regulation of DNA-templated transcription, elongation (GO:0032786)
positive regulation of histone methylation (GO:0031062)		positive regulation of histone methylation (GO:0031062)
positive regulation of histone modification (GO:0031058)		positive regulation of histone modification (GO:0031058)
positive regulation of macromolecule biosynthetic process (GO:0010557)		positive regulation of macromolecule biosynthetic process (GO:0010557)
positive regulation of macromolecule metabolic process (GO:0010604)		positive regulation of macromolecule metabolic process (GO:0010604)
positive regulation of metabolic process (GO:0009893)		positive regulation of metabolic process (GO:0009893)
positive regulation of nitrogen compound metabolic process (GO:0051173)		positive regulation of nitrogen compound metabolic process (GO:0051173)
positive regulation of nucleic acid-templated transcription (GO:1903508)		positive regulation of nucleic acid-templated transcription (GO:1903508)
positive regulation of nucleobase-containing compound metabolic process (GO:0045935)		positive regulation of nucleobase-containing compound metabolic process (GO:0045935)
positive regulation of organelle organization (GO:0010638)		positive regulation of organelle organization (GO:0010638)
positive regulation of protein metabolic process (GO:0051247)		positive regulation of protein metabolic process (GO:0051247)
positive regulation of protein-containing complex assembly (GO:0031334)		positive regulation of protein-containing complex assembly (GO:0031334)
positive regulation of RNA biosynthetic process (GO:1902680)		positive regulation of RNA biosynthetic process (GO:1902680)
positive regulation of RNA metabolic process (GO:0051254)		positive regulation of RNA metabolic process (GO:0051254)
positive regulation of transcription by RNA polymerase II (GO:0045944)		positive regulation of transcription by RNA polymerase II (GO:0045944)
positive regulation of transcription elongation by RNA polymerase II (GO:0032968)		positive regulation of transcription elongation by RNA polymerase II (GO:0032968)
post-transcriptional regulation of gene expression (GO:0010608)		post-transcriptional regulation of gene expression (GO:0010608)
primary metabolic process (GO:0044238)		primary metabolic process (GO:0044238)
protein acylation (GO:0043543)		protein acylation (GO:0043543)
protein import into nucleus (GO:0006606)		protein import into nucleus (GO:0006606)
protein localization (GO:0008104)		protein localization (GO:0008104)
protein localization to nucleus (GO:0034504)		protein localization to nucleus (GO:0034504)
protein localization to organelle (GO:0033365)		protein localization to organelle (GO:0033365)
protein metabolic process (GO:0019538)		protein metabolic process (GO:0019538)
protein modification process (GO:0036211)		protein modification process (GO:0036211)
protein transport (GO:0015031)		protein transport (GO:0015031)
protein-containing complex assembly (GO:0065003)		protein-containing complex assembly (GO:0065003)
protein-containing complex disassembly (GO:0032984)		protein-containing complex disassembly (GO:0032984)
protein-containing complex organization (GO:0043933)		protein-containing complex organization (GO:0043933)
protein-DNA complex assembly (GO:0065004)		protein-DNA complex assembly (GO:0065004)
protein-DNA complex subunit organization (GO:0071824)		protein-DNA complex subunit organization (GO:0071824)
regulation of biological process (GO:0050789)		regulation of biological process (GO:0050789)
regulation of biosynthetic process (GO:0009889)		regulation of biosynthetic process (GO:0009889)
regulation of catabolic process (GO:0009894)		regulation of catabolic process (GO:0009894)
regulation of catalytic activity (GO:0050790)		regulation of catalytic activity (GO:0050790)
regulation of cell communication (GO:0010646)		regulation of cell communication (GO:0010646)
regulation of cell cycle (GO:0051726)		regulation of cell cycle (GO:0051726)
regulation of cell cycle phase transition (GO:1901987)		regulation of cell cycle phase transition (GO:1901987)
regulation of cell cycle process (GO:0010564)		regulation of cell cycle process (GO:0010564)
regulation of cellular amide metabolic process (GO:0034248)		regulation of cellular amide metabolic process (GO:0034248)
regulation of cellular biosynthetic process (GO:0031326)		regulation of cellular biosynthetic process (GO:0031326)
regulation of cellular catabolic process (GO:0031329)		regulation of cellular catabolic process (GO:0031329)
regulation of cellular component biogenesis (GO:0044087)		regulation of cellular component biogenesis (GO:0044087)
regulation of cellular component organization (GO:0051128)		regulation of cellular component organization (GO:0051128)
regulation of cellular macromolecule biosynthetic process (GO:2000112)		regulation of cellular macromolecule biosynthetic process (GO:2000112)
regulation of cellular metabolic process (GO:0031323)		regulation of cellular metabolic process (GO:0031323)
regulation of cellular process (GO:0050794)		regulation of cellular process (GO:0050794)
regulation of chromatin organization (GO:1902275)		regulation of chromatin organization (GO:1902275)
regulation of chromosome segregation (GO:0051983)		regulation of chromosome segregation (GO:0051983)
regulation of cytoskeleton organization (GO:0051493)		regulation of cytoskeleton organization (GO:0051493)
regulation of DNA metabolic process (GO:0051052)		regulation of DNA metabolic process (GO:0051052)
regulation of DNA replication (GO:0006275)		regulation of DNA replication (GO:0006275)
regulation of DNA-templated DNA replication (GO:0090329)		regulation of DNA-templated DNA replication (GO:0090329)
regulation of DNA-templated transcription (GO:0006355)		regulation of DNA-templated transcription (GO:0006355)
regulation of DNA-templated transcription elongation (GO:0032784)		regulation of DNA-templated transcription elongation (GO:0032784)
regulation of gene expression (GO:0010468)		regulation of gene expression (GO:0010468)
regulation of growth (GO:0040008)		regulation of growth (GO:0040008)
regulation of histone methylation (GO:0031060)		regulation of histone methylation (GO:0031060)
regulation of histone modification (GO:0031056)		regulation of histone modification (GO:0031056)
regulation of macroautophagy (GO:0016241)		regulation of macroautophagy (GO:0016241)
regulation of macromolecule biosynthetic process (GO:0010556)		regulation of macromolecule biosynthetic process (GO:0010556)
regulation of macromolecule metabolic process (GO:0060255)		regulation of macromolecule metabolic process (GO:0060255)
regulation of metabolic process (GO:0019222)		regulation of metabolic process (GO:0019222)
regulation of microtubule-based process (GO:0032886)		regulation of microtubule-based process (GO:0032886)
regulation of mitotic cell cycle (GO:0007346)		regulation of mitotic cell cycle (GO:0007346)
regulation of mitotic cell cycle phase transition (GO:1901990)		regulation of mitotic cell cycle phase transition (GO:1901990)
regulation of molecular function (GO:0065009)		regulation of molecular function (GO:0065009)
regulation of mRNA metabolic process (GO:1903311)		regulation of mRNA metabolic process (GO:1903311)
regulation of nitrogen compound metabolic process (GO:0051171)		regulation of nitrogen compound metabolic process (GO:0051171)
regulation of nucleic acid-templated transcription (GO:1903506)		regulation of nucleic acid-templated transcription (GO:1903506)
regulation of nucleobase-containing compound metabolic process (GO:0019219)		regulation of nucleobase-containing compound metabolic process (GO:0019219)
regulation of organelle assembly (GO:1902115)		regulation of organelle assembly (GO:1902115)
regulation of organelle organization (GO:0033043)		regulation of organelle organization (GO:0033043)
regulation of phosphate metabolic process (GO:0019220)		regulation of phosphate metabolic process (GO:0019220)
regulation of phosphorus metabolic process (GO:0051174)		regulation of phosphorus metabolic process (GO:0051174)
regulation of primary metabolic process (GO:0080090)		regulation of primary metabolic process (GO:0080090)
regulation of protein dephosphorylation (GO:0035304)		regulation of protein dephosphorylation (GO:0035304)
regulation of protein metabolic process (GO:0051246)		regulation of protein metabolic process (GO:0051246)
regulation of protein modification by small protein conjugation or removal (GO:1903320)		regulation of protein modification by small protein conjugation or removal (GO:1903320)
regulation of protein modification process (GO:0031399)		regulation of protein modification process (GO:0031399)
regulation of protein-containing complex assembly (GO:0043254)		regulation of protein-containing complex assembly (GO:0043254)
regulation of response to stimulus (GO:0048583)		regulation of response to stimulus (GO:0048583)
regulation of RNA biosynthetic process (GO:2001141)		regulation of RNA biosynthetic process (GO:2001141)
regulation of RNA metabolic process (GO:0051252)		regulation of RNA metabolic process (GO:0051252)
regulation of signal transduction (GO:0009966)		regulation of signal transduction (GO:0009966)
regulation of signaling (GO:0023051)		regulation of signaling (GO:0023051)
regulation of transcription by RNA polymerase II (GO:0006357)		regulation of transcription by RNA polymerase II (GO:0006357)
regulation of transcription elongation by RNA polymerase II (GO:0034243)		regulation of transcription elongation by RNA polymerase II (GO:0034243)
regulation of transferase activity (GO:0051338)		regulation of transferase activity (GO:0051338)
regulation of translation (GO:0006417)		regulation of translation (GO:0006417)
ribonucleoprotein complex assembly (GO:0022618)		ribonucleoprotein complex assembly (GO:0022618)
ribonucleoprotein complex biogenesis (GO:0022613)		ribonucleoprotein complex biogenesis (GO:0022613)
ribonucleoprotein complex subunit organization (GO:0071826)		ribonucleoprotein complex subunit organization (GO:0071826)
ribosomal large subunit biogenesis (GO:0042273)		ribosomal large subunit biogenesis (GO:0042273)
ribosome biogenesis (GO:0042254)		ribosome biogenesis (GO:0042254)
RNA biosynthetic process (GO:0032774)		RNA biosynthetic process (GO:0032774)
RNA catabolic process (GO:0006401)		RNA catabolic process (GO:0006401)
RNA export from nucleus (GO:0006405)		RNA export from nucleus (GO:0006405)
RNA localization (GO:0006403)		RNA localization (GO:0006403)
RNA metabolic process (GO:0016070)		RNA metabolic process (GO:0016070)
RNA processing (GO:0006396)		RNA processing (GO:0006396)
RNA splicing (GO:0008380)		RNA splicing (GO:0008380)
RNA splicing, via transesterification reactions (GO:0000375)		RNA splicing, via transesterification reactions (GO:0000375)
RNA splicing, via transesterification reactions with bulged adenosine as nucleophile (GO:0000377)		RNA splicing, via transesterification reactions with bulged adenosine as nucleophile (GO:0000377)
RNA transport (GO:0050658)		RNA transport (GO:0050658)
rRNA metabolic process (GO:0016072)		rRNA metabolic process (GO:0016072)
rRNA processing (GO:0006364)		rRNA processing (GO:0006364)
sister chromatid segregation (GO:0000819)		sister chromatid segregation (GO:0000819)
small molecule metabolic process (GO:0044281)		small molecule metabolic process (GO:0044281)
spliceosomal complex assembly (GO:0000245)		spliceosomal complex assembly (GO:0000245)
telomere organization (GO:0032200)		telomere organization (GO:0032200)
transcription by RNA polymerase II (GO:0006366)		transcription by RNA polymerase II (GO:0006366)
translation (GO:0006412)		translation (GO:0006412)
transmembrane transport (GO:0055085)	Below this line GOs are unique	transmembrane transport (GO:0055085)
alcohol biosynthetic process (GO:0046165)		actin filament-based process (GO:0030029)
alcohol metabolic process (GO:0006066)		actin-myosin filament sliding (GO:0033275)
amide biosynthetic process (GO:0043604)		activation of innate immune response (GO:0002218)
amino acid transmembrane transport (GO:0003333)		adaptive immune response (GO:0002250)
amino acid transport (GO:0006865)		alternative mRNA splicing, via spliceosome (GO:0000380)
anion transmembrane transport (GO:0098656)		anatomical structure development (GO:0048856)
aromatic compound catabolic process (GO:0019439)		anion transport (GO:0006820)
asexual reproduction (GO:0019954)		antimicrobial humoral response (GO:0019730)
attachment of spindle microtubules to kinetochore (GO:0008608)		apoptotic process (GO:0006915)
biosynthetic process (GO:0009058)		apoptotic signaling pathway (GO:0097190)
carbohydrate metabolic process (GO:0005975)		arachidonic acid metabolic process (GO:0019369)
carboxylic acid metabolic process (GO:0019752)		autophagy (GO:0006914)
carboxylic acid transmembrane transport (GO:1905039)		axo-dendritic transport (GO:0008088)
cation transmembrane transport (GO:0098655)		axonal transport (GO:0098930)
cation transport (GO:0006812)		brain development (GO:0007420)
cell budding (GO:0007114)		carbohydrate derivative biosynthetic process (GO:1901137)
cell communication (GO:0007154)		carbohydrate derivative metabolic process (GO:1901135)
cellular amide metabolic process (GO:0043603)		carboxylic acid transport (GO:0046942)
cellular iron ion homeostasis (GO:0006879)		cell adhesion (GO:0007155)
cellular macromolecule biosynthetic process (GO:0034645)		cell cycle DNA replication (GO:0044786)
cellular metal ion homeostasis (GO:0006875)		cell cycle G1/S phase transition (GO:0044843)
cellular response to heat (GO:0034605)		cell cycle G2/M phase transition (GO:0044839)
cellular response to stimulus (GO:0051716)		cell cycle phase transition (GO:0044770)
cleavage involved in rRNA processing (GO:0000469)		cell death (GO:0008219)
CUT catabolic process (GO:0071034)		cell differentiation (GO:0030154)
CUT metabolic process (GO:0071043)		cell killing (GO:0001906)
DNA-templated DNA replication maintenance of fidelity (GO:0045005)		cell recognition (GO:0008037)
DNA-templated transcription initiation (GO:0006352)		cell surface receptor signaling pathway (GO:0007166)
endonucleolytic cleavage in ITS1 to separate SSU-rRNA from 5.8S rRNA and LSU-rRNA from tricistronic rRNA transcript (SSU-rRNA, 5.8S rRNA, LSU-rRNA) (GO:0000447)		cellular component disassembly (GO:0022411)
endonucleolytic cleavage involved in rRNA processing (GO:0000478)		cellular detoxification (GO:1990748)
endonucleolytic cleavage of tricistronic rRNA transcript (SSU-rRNA, 5.8S rRNA, LSU-rRNA) (GO:0000479)		cellular developmental process (GO:0048869)
establishment of protein localization to membrane (GO:0090150)		cellular hormone metabolic process (GO:0034754)
glycerolipid metabolic process (GO:0046486)		cellular oxidant detoxification (GO:0098869)
iron ion homeostasis (GO:0055072)		cellular response to abiotic stimulus (GO:0071214)
lipid biosynthetic process (GO:0008610)		cellular response to decreased oxygen levels (GO:0036294)
lipid catabolic process (GO:0016042)		cellular response to environmental stimulus (GO:0104004)
localization within membrane (GO:0051668)		cellular response to hypoxia (GO:0071456)
maturation of 5.8S rRNA (GO:0000460)		cellular response to lectin (GO:1990858)
maturation of 5.8S rRNA from tricistronic rRNA transcript (SSU-rRNA, 5.8S rRNA, LSU-rRNA) (GO:0000466)		cellular response to leukemia inhibitory factor (GO:1990830)
maturation of LSU-rRNA from tricistronic rRNA transcript (SSU-rRNA, 5.8S rRNA, LSU-rRNA) (GO:0000463)		cellular response to oxygen levels (GO:0071453)
maturation of SSU-rRNA (GO:0030490)		cellular senescence (GO:0090398)
maturation of SSU-rRNA from tricistronic rRNA transcript (SSU-rRNA, 5.8S rRNA, LSU-rRNA) (GO:0000462)		CENP-A containing chromatin assembly (GO:0034080)
meiosis I cell cycle process (GO:0061982)		central nervous system development (GO:0007417)
membrane lipid metabolic process (GO:0006643)		centromere complex assembly (GO:0034508)
metal ion homeostasis (GO:0055065)		centrosome cycle (GO:0007098)
monocarboxylic acid metabolic process (GO:0032787)		cerebral cortex development (GO:0021987)
mRNA 3'-end processing (GO:0031124)		chemotaxis (GO:0006935)
ncRNA transcription (GO:0098781)		chordate embryonic development (GO:0043009)
negative regulation of catalytic activity (GO:0043086)		chromatin remodeling at centromere (GO:0031055)
negative regulation of cellular amide metabolic process (GO:0034249)		chromosome localization (GO:0050000)
negative regulation of cellular macromolecule biosynthetic process (GO:2000113)		complement activation (GO:0006956)
negative regulation of chromatin organization (GO:1905268)		complement activation, classical pathway (GO:0006958)
negative regulation of heterochromatin formation (GO:0031452)		cytokinesis (GO:0000910)
negative regulation of heterochromatin organization (GO:0120262)		cytokinetic process (GO:0032506)
negative regulation of silent mating-type cassette heterochromatin formation (GO:0061186)		cytoskeleton organization (GO:0007010)
negative regulation of translation (GO:0017148)		cytoskeleton-dependent cytokinesis (GO:0061640)
NLS-bearing protein import into nucleus (GO:0006607)		cytoskeleton-dependent intracellular transport (GO:0030705)
nuclear mRNA surveillance (GO:0071028)		defense response (GO:0006952)
nuclear RNA surveillance (GO:0071027)		defense response to bacterium (GO:0042742)
nuclear-transcribed mRNA catabolic process, 3'-5' exonucleolytic nonsense-mediated decay (GO:0070478)		defense response to fungus (GO:0050832)
nuclear-transcribed mRNA catabolic process, exonucleolytic (GO:0000291)		detection of chemical stimulus (GO:0009593)
nucleic acid phosphodiester bond hydrolysis (GO:0090305)		detection of chemical stimulus involved in sensory perception (GO:0050907)
nucleotide-excision repair (GO:0006289)		detection of chemical stimulus involved in sensory perception of smell (GO:0050911)
organic acid metabolic process (GO:0006082)		detection of stimulus (GO:0051606)
organic acid transmembrane transport (GO:1903825)		detection of stimulus involved in sensory perception (GO:0050906)
organic cyclic compound catabolic process (GO:1901361)		detoxification (GO:0098754)
organic hydroxy compound biosynthetic process (GO:1901617)		developmental process (GO:0032502)
organic substance biosynthetic process (GO:1901576)		DNA biosynthetic process (GO:0071897)
organic substance transport (GO:0071702)		DNA conformation change (GO:0071103)
organophosphate metabolic process (GO:0019637)		DNA geometric change (GO:0032392)
oxoacid metabolic process (GO:0043436)		DNA integrity checkpoint signaling (GO:0031570)
peptide metabolic process (GO:0006518)		DNA recombination (GO:0006310)
phospholipid metabolic process (GO:0006644)		embryo development (GO:0009790)
phosphorylation of RNA polymerase II C-terminal domain (GO:0070816)		embryo development ending in birth or egg hatching (GO:0009792)
poly(A)+ mRNA export from nucleus (GO:0016973)		endomembrane system organization (GO:0010256)
positive regulation of cytoskeleton organization (GO:0051495)		endosomal transport (GO:0016197)
positive regulation of supramolecular fiber organization (GO:1902905)		endosome to lysosome transport via multivesicular body sorting pathway (GO:0032510)
positive regulation of transcription by RNA polymerase I (GO:0045943)		endosome transport via multivesicular body sorting pathway (GO:0032509)
positive regulation of transcription elongation by RNA polymerase I (GO:2001209)		establishment of chromosome localization (GO:0051303)
protein localization to membrane (GO:0072657)		exocytic process (GO:0140029)
protein targeting (GO:0006605)		external encapsulating structure organization (GO:0045229)
protein-containing complex localization (GO:0031503)		extracellular matrix organization (GO:0030198)
pyrimidine-containing compound metabolic process (GO:0072527)		extracellular structure organization (GO:0043062)
regulation of cytoplasmic mRNA processing body assembly (GO:0010603)		facultative heterochromatin formation (GO:0140718)
regulation of heterochromatin formation (GO:0031445)		G protein-coupled receptor signaling pathway (GO:0007186)
regulation of heterochromatin organization (GO:0120261)		G1/S transition of mitotic cell cycle (GO:0000082)
regulation of histone H2B ubiquitination (GO:2001166)		G2/M transition of mitotic cell cycle (GO:0000086)
regulation of histone ubiquitination (GO:0033182)		gene silencing by RNA (GO:0031047)
regulation of protein phosphorylation (GO:0001932)		glycoprotein biosynthetic process (GO:0009101)
regulation of protein polymerization (GO:0032271)		glycoprotein metabolic process (GO:0009100)
regulation of silent mating-type cassette heterochromatin formation (GO:0090054)		Golgi vesicle transport (GO:0048193)
regulation of supramolecular fiber organization (GO:1902903)		head development (GO:0060322)
regulation of transcription by RNA polymerase I (GO:0006356)		histone deacetylation (GO:0016575)
regulation of transcription elongation by RNA polymerase I (GO:2001207)		histone H3 acetylation (GO:0043966)
reproduction (GO:0000003)		histone H3-K4 methylation (GO:0051568)
reproductive process (GO:0022414)		histone H4 acetylation (GO:0043967)
response to heat (GO:0009408)		histone lysine methylation (GO:0034968)
response to stimulus (GO:0050896)		histone methylation (GO:0016571)
response to stress (GO:0006950)		Homo sapiens
response to temperature stimulus (GO:0009266)		hormone metabolic process (GO:0042445)
response to toxic substance (GO:0009636)		humoral immune response (GO:0006959)
ribosomal large subunit assembly (GO:0000027)		humoral immune response mediated by circulating immunoglobulin (GO:0002455)
ribosomal large subunit export from nucleus (GO:0000055)		immune response (GO:0006955)
ribosomal small subunit biogenesis (GO:0042274)		immune system process (GO:0002376)
ribosomal subunit export from nucleus (GO:0000054)		in utero embryonic development (GO:0001701)
ribosome assembly (GO:0042255)		intrinsic apoptotic signaling pathway (GO:0097193)
ribosome localization (GO:0033750)		intrinsic apoptotic signaling pathway in response to DNA damage (GO:0008630)
RNA 3'-end processing (GO:0031123)		locomotion (GO:0040011)
RNA phosphodiester bond hydrolysis (GO:0090501)		long-chain fatty acid metabolic process (GO:0001676)
RNA surveillance (GO:0071025)		lymphocyte mediated immunity (GO:0002449)
rRNA transcription (GO:0009303)		macroautophagy (GO:0016236)
Saccharomyces cerevisiae		macromolecule glycosylation (GO:0043413)
signal transduction (GO:0007165)		macromolecule methylation (GO:0043414)
signaling (GO:0023052)		maintenance of cell number (GO:0098727)
silent mating-type cassette heterochromatin formation (GO:0030466)		membrane docking (GO:0022406)
small molecule biosynthetic process (GO:0044283)		membrane fission (GO:0090148)
small molecule catabolic process (GO:0044282)		membrane fusion (GO:0061025)
small regulatory ncRNA 3'-end processing (GO:0043628)		metaphase plate congression (GO:0051310)
sno(s)RNA 3'-end processing (GO:0031126)		methylation (GO:0032259)
sno(s)RNA metabolic process (GO:0016074)		microtubule cytoskeleton organization (GO:0000226)
sno(s)RNA processing (GO:0043144)		microtubule cytoskeleton organization involved in mitosis (GO:1902850)
snRNA metabolic process (GO:0016073)		microtubule organizing center organization (GO:0031023)
spliceosomal conformational changes to generate catalytic conformation (GO:0000393)		microtubule polymerization (GO:0046785)
transcription by RNA polymerase III (GO:0006383)		microtubule-based process (GO:0007017)
transcription elongation by RNA polymerase II promoter (GO:0006368)		microtubule-based transport (GO:0099111)
transcription initiation at RNA polymerase II promoter (GO:0006367)		mitotic cell cycle phase transition (GO:0044772)
transition metal ion homeostasis (GO:0055076)		mitotic cytokinesis (GO:0000281)
transposition (GO:0032196)		mitotic DNA damage checkpoint signaling (GO:0044773)
transposition, RNA-mediated (GO:0032197)		mitotic DNA integrity checkpoint signaling (GO:0044774)
vitamin metabolic process (GO:0006766)		mitotic metaphase plate congression (GO:0007080)
water-soluble vitamin metabolic process (GO:0006767)		mitotic nuclear division (GO:0140014)
		mitotic sister chromatid segregation (GO:0000070)
		mitotic spindle assembly (GO:0090307)
		mitotic spindle organization (GO:0007052)
		modification-dependent macromolecule catabolic process (GO:0043632)
		modification-dependent protein catabolic process (GO:0019941)
		monocarboxylic acid transport (GO:0015718)
		mRNA cis splicing, via spliceosome (GO:0045292)
		multicellular organism development (GO:0007275)
		multivesicular body assembly (GO:0036258)
		multivesicular body organization (GO:0036257)
		multivesicular body sorting pathway (GO:0071985)
		muscle filament sliding (GO:0030049)
		myeloid leukocyte migration (GO:0097529)
		negative regulation of catabolic process (GO:0009895)
		negative regulation of cell communication (GO:0010648)
		negative regulation of cell cycle checkpoint (GO:1901977)
		negative regulation of cell cycle G1/S phase transition (GO:1902807)
		negative regulation of cellular catabolic process (GO:0031330)
		negative regulation of chromosome organization (GO:2001251)
		negative regulation of DNA metabolic process (GO:0051053)
		negative regulation of DNA recombination (GO:0045910)
		negative regulation of DNA replication (GO:0008156)
		negative regulation of DNA-templated transcription, elongation (GO:0032785)
		negative regulation of G1/S transition of mitotic cell cycle (GO:2000134)
		negative regulation of intracellular signal transduction (GO:1902532)
		negative regulation of kinase activity (GO:0033673)
		negative regulation of mRNA metabolic process (GO:1903312)
		negative regulation of mRNA processing (GO:0050686)
		negative regulation of organelle organization (GO:0010639)
		negative regulation of phosphate metabolic process (GO:0045936)
		negative regulation of phosphorus metabolic process (GO:0010563)
		negative regulation of phosphorylation (GO:0042326)
		negative regulation of protein kinase activity (GO:0006469)
		negative regulation of protein modification by small protein conjugation or removal (GO:1903321)
		negative regulation of protein modification process (GO:0031400)
		negative regulation of protein phosphorylation (GO:0001933)
		negative regulation of protein sumoylation (GO:0033234)
		negative regulation of protein-containing complex assembly (GO:0031333)
		negative regulation of response to stimulus (GO:0048585)
		negative regulation of RNA catabolic process (GO:1902369)
		negative regulation of signal transduction (GO:0009968)
		negative regulation of signaling (GO:0023057)
		negative regulation of telomere maintenance (GO:0032205)
		negative regulation of transferase activity (GO:0051348)
		nervous system process (GO:0050877)
		neuropeptide signaling pathway (GO:0007218)
		nuclear envelope organization (GO:0006998)
		nuclear membrane reassembly (GO:0031468)
		nuclear pore organization (GO:0006999)
		nuclear-transcribed mRNA catabolic process, nonsense-mediated decay (GO:0000184)
		nucleus organization (GO:0006997)
		olefinic compound metabolic process (GO:0120254)
		organelle fission (GO:0048285)
		organelle fusion (GO:0048284)
		organelle localization by membrane tethering (GO:0140056)
		organelle membrane fusion (GO:0090174)
		organelle transport along microtubule (GO:0072384)
		organic anion transport (GO:0015711)
		organic cyclic compound biosynthetic process (GO:1901362)
		peptidyl-amino acid modification (GO:0018193)
		peptidyl-lysine methylation (GO:0018022)
		peptidyl-lysine trimethylation (GO:0018023)
		peptidyl-serine modification (GO:0018209)
		peptidyl-serine phosphorylation (GO:0018105)
		phagocytosis, recognition (GO:0006910)
		phospholipase C-activating G protein-coupled receptor signaling pathway (GO:0007200)
		phosphorylation (GO:0016310)
		positive regulation of apoptotic process (GO:0043065)
		positive regulation of binding (GO:0051099)
		positive regulation of cell cycle (GO:0045787)
		positive regulation of cell cycle phase transition (GO:1901989)
		positive regulation of cell cycle process (GO:0090068)
		positive regulation of cell death (GO:0010942)
		positive regulation of cellular amide metabolic process (GO:0034250)
		positive regulation of chromosome organization (GO:2001252)
		positive regulation of chromosome segregation (GO:0051984)
		positive regulation of cytokinesis (GO:0032467)
		positive regulation of cytosolic calcium ion concentration (GO:0007204)
		positive regulation of developmental process (GO:0051094)
		positive regulation of DNA biosynthetic process (GO:2000573)
		positive regulation of DNA metabolic process (GO:0051054)
		positive regulation of DNA repair (GO:0045739)
		positive regulation of DNA-templated transcription initiation (GO:2000144)
		positive regulation of double-strand break repair (GO:2000781)
		positive regulation of mitochondrial membrane permeability (GO:0035794)
		positive regulation of mitotic cell cycle (GO:0045931)
		positive regulation of mitotic cell cycle phase transition (GO:1901992)
		positive regulation of mRNA metabolic process (GO:1903313)
		positive regulation of neuron apoptotic process (GO:0043525)
		positive regulation of neuron death (GO:1901216)
		positive regulation of programmed cell death (GO:0043068)
		positive regulation of proteasomal protein catabolic process (GO:1901800)
		positive regulation of protein catabolic process (GO:0045732)
		positive regulation of protein localization (GO:1903829)
		positive regulation of protein modification by small protein conjugation or removal (GO:1903322)
		positive regulation of protein modification process (GO:0031401)
		positive regulation of protein ubiquitination (GO:0031398)
		positive regulation of response to DNA damage stimulus (GO:2001022)
		positive regulation of RNA splicing (GO:0033120)
		positive regulation of stem cell population maintenance (GO:1902459)
		positive regulation of telomere maintenance (GO:0032206)
		positive regulation of transcription initiation by RNA polymerase II (GO:0060261)
		positive regulation of translation (GO:0045727)
		positive regulation of Wnt signaling pathway (GO:0030177)
		post-Golgi vesicle-mediated transport (GO:0006892)
		process utilizing autophagic mechanism (GO:0061919)
		programmed cell death (GO:0012501)
		proteasomal protein catabolic process (GO:0010498)
		proteasome-mediated ubiquitin-dependent protein catabolic process (GO:0043161)
		protein acetylation (GO:0006473)
		protein alkylation (GO:0008213)
		protein autophosphorylation (GO:0046777)
		protein catabolic process (GO:0030163)
		protein deacetylation (GO:0006476)
		protein deacylation (GO:0035601)
		protein glycosylation (GO:0006486)
		protein localization to centrosome (GO:0071539)
		protein localization to chromatin (GO:0071168)
		protein localization to chromosome (GO:0034502)
		protein localization to chromosome, centromeric region (GO:0071459)
		protein localization to cytoskeleton (GO:0044380)
		protein localization to microtubule cytoskeleton (GO:0072698)
		protein localization to microtubule organizing center (GO:1905508)
		protein localization to nuclear envelope (GO:0090435)
		protein methylation (GO:0006479)
		protein modification by small protein conjugation (GO:0032446)
		protein modification by small protein conjugation or removal (GO:0070647)
		protein phosphorylation (GO:0006468)
		protein stabilization (GO:0050821)
		protein sumoylation (GO:0016925)
		protein ubiquitination (GO:0016567)
		proteolysis involved in protein catabolic process (GO:0051603)
		regulation of alternative mRNA splicing, via spliceosome (GO:0000381)
		regulation of androgen receptor signaling pathway (GO:0060765)
		regulation of apoptotic process (GO:0042981)
		regulation of attachment of spindle microtubules to kinetochore (GO:0051988)
		regulation of autophagy (GO:0010506)
		regulation of binding (GO:0051098)
		regulation of canonical Wnt signaling pathway (GO:0060828)
		regulation of cell cycle checkpoint (GO:1901976)
		regulation of cell cycle G1/S phase transition (GO:1902806)
		regulation of cell cycle G2/M phase transition (GO:1902749)
		regulation of cell death (GO:0010941)
		regulation of cell differentiation (GO:0045595)
		regulation of cell division (GO:0051302)
		regulation of cellular localization (GO:0060341)
		regulation of cellular response to heat (GO:1900034)
		regulation of cellular response to stress (GO:0080135)
		regulation of cellular response to transforming growth factor beta stimulus (GO:1903844)
		regulation of centrosome cycle (GO:0046605)
		regulation of centrosome duplication (GO:0010824)
		regulation of chromosome organization (GO:0033044)
		regulation of chromosome separation (GO:1905818)
		regulation of cytokinesis (GO:0032465)
		regulation of dephosphorylation (GO:0035303)
		regulation of developmental process (GO:0050793)
		regulation of DNA binding (GO:0051101)
		regulation of DNA biosynthetic process (GO:2000278)
		regulation of DNA recombination (GO:0000018)
		regulation of DNA repair (GO:0006282)
		regulation of DNA-templated transcription in response to stress (GO:0043620)
		regulation of DNA-templated transcription initiation (GO:2000142)
		regulation of double-strand break repair (GO:2000779)
		regulation of double-strand break repair via homologous recombination (GO:0010569)
		regulation of G1/S transition of mitotic cell cycle (GO:2000045)
		regulation of G2/M transition of mitotic cell cycle (GO:0010389)
		regulation of histone acetylation (GO:0035065)
		regulation of histone H3-K4 methylation (GO:0051569)
		regulation of hormone levels (GO:0010817)
		regulation of intracellular signal transduction (GO:1902531)
		regulation of intracellular steroid hormone receptor signaling pathway (GO:0033143)
		regulation of intracellular transport (GO:0032386)
		regulation of kinase activity (GO:0043549)
		regulation of metaphase/anaphase transition of cell cycle (GO:1902099)
		regulation of microtubule cytoskeleton organization (GO:0070507)
		regulation of mitotic cell cycle spindle assembly checkpoint (GO:0090266)
		regulation of mitotic metaphase/anaphase transition (GO:0030071)
		regulation of mitotic sister chromatid segregation (GO:0033047)
		regulation of mitotic sister chromatid separation (GO:0010965)
		regulation of mitotic spindle assembly (GO:1901673)
		regulation of mitotic spindle checkpoint (GO:1903504)
		regulation of mitotic spindle organization (GO:0060236)
		regulation of mRNA catabolic process (GO:0061013)
		regulation of mRNA processing (GO:0050684)
		regulation of mRNA splicing, via spliceosome (GO:0048024)
		regulation of mRNA stability (GO:0043488)
		regulation of nucleotide-excision repair (GO:2000819)
		regulation of peptidyl-lysine acetylation (GO:2000756)
		regulation of phosphorylation (GO:0042325)
		regulation of postsynaptic membrane potential (GO:0060078)
		regulation of programmed cell death (GO:0043067)
		regulation of proteasomal protein catabolic process (GO:0061136)
		regulation of protein acetylation (GO:1901983)
		regulation of protein catabolic process (GO:0042176)
		regulation of protein deacetylation (GO:0090311)
		regulation of protein kinase activity (GO:0045859)
		regulation of protein localization (GO:0032880)
		regulation of protein serine/threonine kinase activity (GO:0071900)
		regulation of protein stability (GO:0031647)
		regulation of protein ubiquitination (GO:0031396)
		regulation of proteolysis involved in protein catabolic process (GO:1903050)
		regulation of response to DNA damage stimulus (GO:2001020)
		regulation of response to stress (GO:0080134)
		regulation of RNA splicing (GO:0043484)
		regulation of RNA stability (GO:0043487)
		regulation of signal transduction by p53 class mediator (GO:1901796)
		regulation of sister chromatid cohesion (GO:0007063)
		regulation of sister chromatid segregation (GO:0033045)
		regulation of spindle assembly (GO:0090169)
		regulation of spindle checkpoint (GO:0090231)
		regulation of spindle organization (GO:0090224)
		regulation of stem cell differentiation (GO:2000736)
		regulation of stem cell population maintenance (GO:2000036)
		regulation of telomerase activity (GO:0051972)
		regulation of telomere capping (GO:1904353)
		regulation of telomere maintenance (GO:0032204)
		regulation of telomere maintenance via telomerase (GO:0032210)
		regulation of telomere maintenance via telomere lengthening (GO:1904356)
		regulation of transcription from RNA polymerase II promoter in response to hypoxia (GO:0061418)
		regulation of transcription initiation by RNA polymerase II (GO:0060260)
		regulation of transforming growth factor beta receptor signaling pathway (GO:0017015)
		regulation of translational initiation (GO:0006446)
		regulation of ubiquitin-protein transferase activity (GO:0051438)
		regulation of Wnt signaling pathway (GO:0030111)
		response to abiotic stimulus (GO:0009628)
		response to external stimulus (GO:0009605)
		response to ionizing radiation (GO:0010212)
		response to lectin (GO:1990840)
		response to leukemia inhibitory factor (GO:1990823)
		response to radiation (GO:0009314)
		response to UV (GO:0009411)
		sensory perception (GO:0007600)
		sensory perception of chemical stimulus (GO:0007606)
		sensory perception of smell (GO:0007608)
		signal transduction by p53 class mediator (GO:0072331)
		signal transduction in response to DNA damage (GO:0042770)
		spindle assembly (GO:0051225)
		spindle organization (GO:0007051)
		stem cell population maintenance (GO:0019827)
		steroid metabolic process (GO:0008202)
		stimulatory C-type lectin receptor signaling pathway (GO:0002223)
		stress granule assembly (GO:0034063)
		sulfur compound metabolic process (GO:0006790)
		system development (GO:0048731)
		system process (GO:0003008)
		taxis (GO:0042330)
		telomere maintenance (GO:0000723)
		translational initiation (GO:0006413)
		transport along microtubule (GO:0010970)
		ubiquitin-dependent protein catabolic process (GO:0006511)
		ubiquitin-dependent protein catabolic process via the multivesicular body sorting pathway (GO:0043162)
		vesicle fusion (GO:0006906)
		vesicle organization (GO:0016050)
		vesicle transport along microtubule (GO:0047496)
		viral budding (GO:0046755)
		viral budding via host ESCRT complex (GO:0039702)
		xenobiotic metabolic process (GO:0006805)
