# Supplementary material
Source: HighWire-hosted journal article supplement (doi:10.1101/rna.079755.123)
Supplement: Supplemental_Table_S6.xlsx [file Supplemental_Table_S6.xlsx]

## Sheet: Sheet1
UniProt	V5	V6	category
Q149N8	ENSG00000146414	0	EDTA-pellet
Q5VVW2	ENSG00000136895	0	EDTA-pellet
Q8WUJ3	ENSG00000103888	0	EDTA-pellet
Q9Y5G2	ENSG00000253910	0	EDTA-pellet
W5XKT8	ENSG00000182310	0	EDTA-pellet
Q70CQ2	ENSG00000115464	-0.0006655855432	EDTA-pellet
Q70CQ2	ENSG00000115464	-0.0006655855432	EDTA-pellet
Q70CQ2	ENSG00000115464	-0.0006655855432	EDTA-pellet
Q70CQ2	ENSG00000115464	-0.0006655855432	EDTA-pellet
Q70CQ2	ENSG00000115464	-0.0006655855432	EDTA-pellet
Q70CQ2	ENSG00000115464	-0.0006655855432	EDTA-pellet
Q70CQ2	ENSG00000115464	-0.0006655855432	EDTA-pellet
Q70CQ2	ENSG00000115464	-0.0006655855432	EDTA-pellet
Q70CQ2	ENSG00000115464	-0.0006655855432	EDTA-pellet
Q70CQ2	ENSG00000115464	-0.0006655855432	EDTA-pellet
Q70CQ2	ENSG00000115464	-0.0006655855432	EDTA-pellet
Q70CQ2	ENSG00000115464	-0.0006655855432	EDTA-pellet
P02751	ENSG00000115414	-0.003895043884	EDTA-pellet
P11717	ENSG00000197081	-0.007020342876	EDTA-pellet
Q5THJ4	ENSG00000048707	-0.01558809842	EDTA-pellet
Q5THJ4	ENSG00000048707	-0.01558809842	EDTA-pellet
Q5THJ4	ENSG00000048707	-0.01558809842	EDTA-pellet
Q5THJ4	ENSG00000048707	-0.01558809842	EDTA-pellet
Q5THJ4	ENSG00000048707	-0.01558809842	EDTA-pellet
Q5THJ4	ENSG00000048707	-0.01558809842	EDTA-pellet
Q5THJ4	ENSG00000048707	-0.01558809842	EDTA-pellet
Q5THJ4	ENSG00000048707	-0.01558809842	EDTA-pellet
Q5THJ4	ENSG00000048707	-0.01558809842	EDTA-pellet
Q5THJ4	ENSG00000048707	-0.01558809842	EDTA-pellet
Q5THJ4	ENSG00000048707	-0.01558809842	EDTA-pellet
Q5THJ4	ENSG00000048707	-0.01558809842	EDTA-pellet
Q5THJ4	ENSG00000048707	-0.01558809842	EDTA-pellet
Q5THJ4	ENSG00000048707	-0.01558809842	EDTA-pellet
Q5THJ4	ENSG00000048707	-0.01558809842	EDTA-pellet
Q5THJ4	ENSG00000048707	-0.01558809842	EDTA-pellet
Q01082	ENSG00000115306	-0.03094913636	EDTA-pellet
Q7Z6Z7	ENSG00000086758	-0.03325218366	EDTA-pellet
Q7Z6Z7	ENSG00000086758	-0.03325218366	EDTA-pellet
Q7Z6Z7	ENSG00000086758	-0.03325218366	EDTA-pellet
Q7Z6Z7	ENSG00000086758	-0.03325218366	EDTA-pellet
Q7Z6Z7	ENSG00000086758	-0.03325218366	EDTA-pellet
Q7Z6Z7	ENSG00000086758	-0.03325218366	EDTA-pellet
Q7Z6Z7	ENSG00000086758	-0.03325218366	EDTA-pellet
Q7Z6Z7	ENSG00000086758	-0.03325218366	EDTA-pellet
Q7Z6Z7	ENSG00000086758	-0.03325218366	EDTA-pellet
Q7Z6Z7	ENSG00000086758	-0.03325218366	EDTA-pellet
Q7Z6Z7	ENSG00000086758	-0.03325218366	EDTA-pellet
Q7Z6Z7	ENSG00000086758	-0.03325218366	EDTA-pellet
Q7Z6Z7	ENSG00000086758	-0.03325218366	EDTA-pellet
Q7Z6Z7	ENSG00000086758	-0.03325218366	EDTA-pellet
Q7Z6Z7	ENSG00000086758	-0.03325218366	EDTA-pellet
Q7Z6Z7	ENSG00000086758	-0.03325218366	EDTA-pellet
Q15751	ENSG00000103657	-0.03407978957	EDTA-pellet
Q15751	ENSG00000103657	-0.03407978957	EDTA-pellet
Q15751	ENSG00000103657	-0.03407978957	EDTA-pellet
Q15751	ENSG00000103657	-0.03407978957	EDTA-pellet
Q15751	ENSG00000103657	-0.03407978957	EDTA-pellet
Q15751	ENSG00000103657	-0.03407978957	EDTA-pellet
Q15751	ENSG00000103657	-0.03407978957	EDTA-pellet
Q15751	ENSG00000103657	-0.03407978957	EDTA-pellet
Q15751	ENSG00000103657	-0.03407978957	EDTA-pellet
Q15751	ENSG00000103657	-0.03407978957	EDTA-pellet
Q15751	ENSG00000103657	-0.03407978957	EDTA-pellet
Q15751	ENSG00000103657	-0.03407978957	EDTA-pellet
Q15751	ENSG00000103657	-0.03407978957	EDTA-pellet
Q15751	ENSG00000103657	-0.03407978957	EDTA-pellet
Q15751	ENSG00000103657	-0.03407978957	EDTA-pellet
Q15751	ENSG00000103657	-0.03407978957	EDTA-pellet
Q15751	ENSG00000103657	-0.03407978957	EDTA-pellet
Q15751	ENSG00000103657	-0.03407978957	EDTA-pellet
Q15751	ENSG00000103657	-0.03407978957	EDTA-pellet
P78524	ENSG00000166444	-0.03476210626	EDTA-pellet
P78527	ENSG00000253729	-0.04526537211	EDTA-pellet
P78527	ENSG00000253729	-0.04526537211	EDTA-pellet
P78527	ENSG00000253729	-0.04526537211	EDTA-pellet
P78527	ENSG00000253729	-0.04526537211	EDTA-pellet
P78527	ENSG00000253729	-0.04526537211	EDTA-pellet
P78527	ENSG00000253729	-0.04526537211	EDTA-pellet
P78527	ENSG00000253729	-0.04526537211	EDTA-pellet
P78527	ENSG00000253729	-0.04526537211	EDTA-pellet
P78527	ENSG00000253729	-0.04526537211	EDTA-pellet
P78527	ENSG00000253729	-0.04526537211	EDTA-pellet
P78527	ENSG00000253729	-0.04526537211	EDTA-pellet
P78527	ENSG00000253729	-0.04526537211	EDTA-pellet
P78527	ENSG00000253729	-0.04526537211	EDTA-pellet
P78527	ENSG00000253729	-0.04526537211	EDTA-pellet
P78527	ENSG00000253729	-0.04526537211	EDTA-pellet
Q8NEZ4	ENSG00000055609	-0.05358282807	EDTA-pellet
Q8NEZ4	ENSG00000055609	-0.05358282807	EDTA-pellet
Q8NEZ4	ENSG00000055609	-0.05358282807	EDTA-pellet
Q8NEZ4	ENSG00000055609	-0.05358282807	EDTA-pellet
Q8NEZ4	ENSG00000055609	-0.05358282807	EDTA-pellet
Q8NEZ4	ENSG00000055609	-0.05358282807	EDTA-pellet
Q8NEZ4	ENSG00000055609	-0.05358282807	EDTA-pellet
Q8NEZ4	ENSG00000055609	-0.05358282807	EDTA-pellet
Q8NEZ4	ENSG00000055609	-0.05358282807	EDTA-pellet
Q8NEZ4	ENSG00000055609	-0.05358282807	EDTA-pellet
Q8NEZ4	ENSG00000055609	-0.05358282807	EDTA-pellet
Q8NEZ4	ENSG00000055609	-0.05358282807	EDTA-pellet
Q8NEZ4	ENSG00000055609	-0.05358282807	EDTA-pellet
Q8NEZ4	ENSG00000055609	-0.05358282807	EDTA-pellet
Q8NEZ4	ENSG00000055609	-0.05358282807	EDTA-pellet
Q8NEZ4	ENSG00000055609	-0.05358282807	EDTA-pellet
Q8NEZ4	ENSG00000055609	-0.05358282807	EDTA-pellet
Q8NEZ4	ENSG00000055609	-0.05358282807	EDTA-pellet
Q8NEZ4	ENSG00000055609	-0.05358282807	EDTA-pellet
Q2LD37	ENSG00000138688	-0.05425463908	EDTA-pellet
Q2LD37	ENSG00000138688	-0.05425463908	EDTA-pellet
Q2LD37	ENSG00000138688	-0.05425463908	EDTA-pellet
Q2LD37	ENSG00000138688	-0.05425463908	EDTA-pellet
Q2LD37	ENSG00000138688	-0.05425463908	EDTA-pellet
Q2LD37	ENSG00000138688	-0.05425463908	EDTA-pellet
Q2LD37	ENSG00000138688	-0.05425463908	EDTA-pellet
Q2LD37	ENSG00000138688	-0.05425463908	EDTA-pellet
Q2LD37	ENSG00000138688	-0.05425463908	EDTA-pellet
Q2LD37	ENSG00000138688	-0.05425463908	EDTA-pellet
Q2LD37	ENSG00000138688	-0.05425463908	EDTA-pellet
Q2LD37	ENSG00000138688	-0.05425463908	EDTA-pellet
Q2LD37	ENSG00000138688	-0.05425463908	EDTA-pellet
Q2LD37	ENSG00000138688	-0.05425463908	EDTA-pellet
Q2LD37	ENSG00000138688	-0.05425463908	EDTA-pellet
Q2LD37	ENSG00000138688	-0.05425463908	EDTA-pellet
Q2LD37	ENSG00000138688	-0.05425463908	EDTA-pellet
Q2LD37	ENSG00000138688	-0.05425463908	EDTA-pellet
Q2LD37	ENSG00000138688	-0.05425463908	EDTA-pellet
Q2LD37	ENSG00000138688	-0.05425463908	EDTA-pellet
Q09666	ENSG00000124942	-0.05440804744	EDTA-pellet
Q09666	ENSG00000124942	-0.05440804744	EDTA-pellet
Q09666	ENSG00000124942	-0.05440804744	EDTA-pellet
Q09666	ENSG00000124942	-0.05440804744	EDTA-pellet
Q09666	ENSG00000124942	-0.05440804744	EDTA-pellet
Q09666	ENSG00000124942	-0.05440804744	EDTA-pellet
Q09666	ENSG00000124942	-0.05440804744	EDTA-pellet
Q09666	ENSG00000124942	-0.05440804744	EDTA-pellet
Q09666	ENSG00000124942	-0.05440804744	EDTA-pellet
Q09666	ENSG00000124942	-0.05440804744	EDTA-pellet
Q09666	ENSG00000124942	-0.05440804744	EDTA-pellet
Q09666	ENSG00000124942	-0.05440804744	EDTA-pellet
Q09666	ENSG00000124942	-0.05440804744	EDTA-pellet
Q09666	ENSG00000124942	-0.05440804744	EDTA-pellet
Q09666	ENSG00000124942	-0.05440804744	EDTA-pellet
Q09666	ENSG00000124942	-0.05440804744	EDTA-pellet
Q09666	ENSG00000124942	-0.05440804744	EDTA-pellet
Q09666	ENSG00000124942	-0.05440804744	EDTA-pellet
Q09666	ENSG00000124942	-0.05440804744	EDTA-pellet
Q09666	ENSG00000124942	-0.05440804744	EDTA-pellet
Q09666	ENSG00000124942	-0.05440804744	EDTA-pellet
Q09666	ENSG00000124942	-0.05440804744	EDTA-pellet
Q09666	ENSG00000124942	-0.05440804744	EDTA-pellet
Q09666	ENSG00000124942	-0.05440804744	EDTA-pellet
Q9UPN3	ENSG00000127603	-0.05473878958	EDTA-pellet
Q9UPN3	ENSG00000127603	-0.05473878958	EDTA-pellet
Q9UPN3	ENSG00000127603	-0.05473878958	EDTA-pellet
Q9UPN3	ENSG00000127603	-0.05473878958	EDTA-pellet
Q9UPN3	ENSG00000127603	-0.05473878958	EDTA-pellet
Q9UPN3	ENSG00000127603	-0.05473878958	EDTA-pellet
Q9UPN3	ENSG00000127603	-0.05473878958	EDTA-pellet
Q9UPN3	ENSG00000127603	-0.05473878958	EDTA-pellet
Q9UPN3	ENSG00000127603	-0.05473878958	EDTA-pellet
Q9UPN3	ENSG00000127603	-0.05473878958	EDTA-pellet
Q9UPN3	ENSG00000127603	-0.05473878958	EDTA-pellet
Q9UPN3	ENSG00000127603	-0.05473878958	EDTA-pellet
Q9UPN3	ENSG00000127603	-0.05473878958	EDTA-pellet
Q9UPN3	ENSG00000127603	-0.05473878958	EDTA-pellet
Q9UPN3	ENSG00000127603	-0.05473878958	EDTA-pellet
Q9UPN3	ENSG00000127603	-0.05473878958	EDTA-pellet
Q9UPN3	ENSG00000127603	-0.05473878958	EDTA-pellet
Q9UPN3	ENSG00000127603	-0.05473878958	EDTA-pellet
Q9UPN3	ENSG00000127603	-0.05473878958	EDTA-pellet
Q9UPN3	ENSG00000127603	-0.05473878958	EDTA-pellet
Q9UPN3	ENSG00000127603	-0.05473878958	EDTA-pellet
Q9UPN3	ENSG00000127603	-0.05473878958	EDTA-pellet
Q9UPN3	ENSG00000127603	-0.05473878958	EDTA-pellet
Q9UPN3	ENSG00000127603	-0.05473878958	EDTA-pellet
Q9UPN3	ENSG00000127603	-0.05473878958	EDTA-pellet
Q9UPN3	ENSG00000127603	-0.05473878958	EDTA-pellet
Q9UPN3	ENSG00000127603	-0.05473878958	EDTA-pellet
Q9UPN3	ENSG00000127603	-0.05473878958	EDTA-pellet
Q9UPN3	ENSG00000127603	-0.05473878958	EDTA-pellet
Q9UPN3	ENSG00000127603	-0.05473878958	EDTA-pellet
Q9UPN3	ENSG00000127603	-0.05473878958	EDTA-pellet
Q9Y4A5	ENSG00000196367	-0.05743336879	EDTA-pellet
Q9Y4A5	ENSG00000196367	-0.05743336879	EDTA-pellet
Q9Y4A5	ENSG00000196367	-0.05743336879	EDTA-pellet
Q9Y4A5	ENSG00000196367	-0.05743336879	EDTA-pellet
Q9Y4A5	ENSG00000196367	-0.05743336879	EDTA-pellet
Q9Y4A5	ENSG00000196367	-0.05743336879	EDTA-pellet
Q9Y4A5	ENSG00000196367	-0.05743336879	EDTA-pellet
Q9Y4A5	ENSG00000196367	-0.05743336879	EDTA-pellet
Q9Y4A5	ENSG00000196367	-0.05743336879	EDTA-pellet
Q9Y4A5	ENSG00000196367	-0.05743336879	EDTA-pellet
Q9Y4A5	ENSG00000196367	-0.05743336879	EDTA-pellet
Q9Y4A5	ENSG00000196367	-0.05743336879	EDTA-pellet
Q9Y4A5	ENSG00000196367	-0.05743336879	EDTA-pellet
Q9Y4A5	ENSG00000196367	-0.05743336879	EDTA-pellet
O14686	ENSG00000167548	-0.05919132493	EDTA-pellet
O14686	ENSG00000167548	-0.05919132493	EDTA-pellet
O14686	ENSG00000167548	-0.05919132493	EDTA-pellet
O14686	ENSG00000167548	-0.05919132493	EDTA-pellet
O14686	ENSG00000167548	-0.05919132493	EDTA-pellet
O14686	ENSG00000167548	-0.05919132493	EDTA-pellet
O14686	ENSG00000167548	-0.05919132493	EDTA-pellet
O14686	ENSG00000167548	-0.05919132493	EDTA-pellet
O14686	ENSG00000167548	-0.05919132493	EDTA-pellet
O14686	ENSG00000167548	-0.05919132493	EDTA-pellet
O14686	ENSG00000167548	-0.05919132493	EDTA-pellet
O14686	ENSG00000167548	-0.05919132493	EDTA-pellet
O14686	ENSG00000167548	-0.05919132493	EDTA-pellet
O14686	ENSG00000167548	-0.05919132493	EDTA-pellet
O14686	ENSG00000167548	-0.05919132493	EDTA-pellet
O14686	ENSG00000167548	-0.05919132493	EDTA-pellet
O14686	ENSG00000167548	-0.05919132493	EDTA-pellet
O14686	ENSG00000167548	-0.05919132493	EDTA-pellet
O14686	ENSG00000167548	-0.05919132493	EDTA-pellet
O14686	ENSG00000167548	-0.05919132493	EDTA-pellet
O14686	ENSG00000167548	-0.05919132493	EDTA-pellet
O14686	ENSG00000167548	-0.05919132493	EDTA-pellet
Q63HN8	ENSG00000173821	-0.06289928147	EDTA-pellet
Q63HN8	ENSG00000173821	-0.06289928147	EDTA-pellet
Q63HN8	ENSG00000173821	-0.06289928147	EDTA-pellet
Q63HN8	ENSG00000173821	-0.06289928147	EDTA-pellet
Q63HN8	ENSG00000173821	-0.06289928147	EDTA-pellet
Q63HN8	ENSG00000173821	-0.06289928147	EDTA-pellet
Q63HN8	ENSG00000173821	-0.06289928147	EDTA-pellet
Q63HN8	ENSG00000173821	-0.06289928147	EDTA-pellet
Q63HN8	ENSG00000173821	-0.06289928147	EDTA-pellet
Q63HN8	ENSG00000173821	-0.06289928147	EDTA-pellet
Q63HN8	ENSG00000173821	-0.06289928147	EDTA-pellet
Q63HN8	ENSG00000173821	-0.06289928147	EDTA-pellet
Q63HN8	ENSG00000173821	-0.06289928147	EDTA-pellet
Q63HN8	ENSG00000173821	-0.06289928147	EDTA-pellet
Q63HN8	ENSG00000173821	-0.06289928147	EDTA-pellet
Q63HN8	ENSG00000173821	-0.06289928147	EDTA-pellet
Q63HN8	ENSG00000173821	-0.06289928147	EDTA-pellet
Q63HN8	ENSG00000173821	-0.06289928147	EDTA-pellet
Q63HN8	ENSG00000173821	-0.06289928147	EDTA-pellet
Q63HN8	ENSG00000173821	-0.06289928147	EDTA-pellet
Q63HN8	ENSG00000173821	-0.06289928147	EDTA-pellet
Q14204	ENSG00000197102	-0.06307259372	EDTA-pellet
Q14204	ENSG00000197102	-0.06307259372	EDTA-pellet
Q14204	ENSG00000197102	-0.06307259372	EDTA-pellet
Q14204	ENSG00000197102	-0.06307259372	EDTA-pellet
Q14204	ENSG00000197102	-0.06307259372	EDTA-pellet
Q14204	ENSG00000197102	-0.06307259372	EDTA-pellet
Q14204	ENSG00000197102	-0.06307259372	EDTA-pellet
Q14204	ENSG00000197102	-0.06307259372	EDTA-pellet
Q14204	ENSG00000197102	-0.06307259372	EDTA-pellet
Q14204	ENSG00000197102	-0.06307259372	EDTA-pellet
Q14204	ENSG00000197102	-0.06307259372	EDTA-pellet
Q14204	ENSG00000197102	-0.06307259372	EDTA-pellet
Q14204	ENSG00000197102	-0.06307259372	EDTA-pellet
Q14204	ENSG00000197102	-0.06307259372	EDTA-pellet
Q14204	ENSG00000197102	-0.06307259372	EDTA-pellet
Q14204	ENSG00000197102	-0.06307259372	EDTA-pellet
Q14204	ENSG00000197102	-0.06307259372	EDTA-pellet
Q14204	ENSG00000197102	-0.06307259372	EDTA-pellet
Q96RW7	ENSG00000143341	-0.06581728449	EDTA-pellet
Q96RW7	ENSG00000143341	-0.06581728449	EDTA-pellet
Q96RW7	ENSG00000143341	-0.06581728449	EDTA-pellet
Q96RW7	ENSG00000143341	-0.06581728449	EDTA-pellet
Q96RW7	ENSG00000143341	-0.06581728449	EDTA-pellet
Q96RW7	ENSG00000143341	-0.06581728449	EDTA-pellet
Q96RW7	ENSG00000143341	-0.06581728449	EDTA-pellet
Q96RW7	ENSG00000143341	-0.06581728449	EDTA-pellet
Q96RW7	ENSG00000143341	-0.06581728449	EDTA-pellet
Q96RW7	ENSG00000143341	-0.06581728449	EDTA-pellet
Q96RW7	ENSG00000143341	-0.06581728449	EDTA-pellet
Q96RW7	ENSG00000143341	-0.06581728449	EDTA-pellet
Q96RW7	ENSG00000143341	-0.06581728449	EDTA-pellet
Q96RW7	ENSG00000143341	-0.06581728449	EDTA-pellet
Q96RW7	ENSG00000143341	-0.06581728449	EDTA-pellet
Q96RW7	ENSG00000143341	-0.06581728449	EDTA-pellet
Q96RW7	ENSG00000143341	-0.06581728449	EDTA-pellet
Q96RW7	ENSG00000143341	-0.06581728449	EDTA-pellet
Q96RW7	ENSG00000143341	-0.06581728449	EDTA-pellet
Q96RW7	ENSG00000143341	-0.06581728449	EDTA-pellet
Q96RW7	ENSG00000143341	-0.06581728449	EDTA-pellet
Q96RW7	ENSG00000143341	-0.06581728449	EDTA-pellet
Q96RW7	ENSG00000143341	-0.06581728449	EDTA-pellet
Q14517	ENSG00000083857	-0.07522266975	EDTA-pellet
Q14517	ENSG00000083857	-0.07522266975	EDTA-pellet
Q14517	ENSG00000083857	-0.07522266975	EDTA-pellet
Q14517	ENSG00000083857	-0.07522266975	EDTA-pellet
Q14517	ENSG00000083857	-0.07522266975	EDTA-pellet
Q14517	ENSG00000083857	-0.07522266975	EDTA-pellet
Q14517	ENSG00000083857	-0.07522266975	EDTA-pellet
Q14517	ENSG00000083857	-0.07522266975	EDTA-pellet
Q14517	ENSG00000083857	-0.07522266975	EDTA-pellet
Q14517	ENSG00000083857	-0.07522266975	EDTA-pellet
Q14517	ENSG00000083857	-0.07522266975	EDTA-pellet
Q14517	ENSG00000083857	-0.07522266975	EDTA-pellet
Q14517	ENSG00000083857	-0.07522266975	EDTA-pellet
Q14517	ENSG00000083857	-0.07522266975	EDTA-pellet
Q14517	ENSG00000083857	-0.07522266975	EDTA-pellet
Q14517	ENSG00000083857	-0.07522266975	EDTA-pellet
Q14517	ENSG00000083857	-0.07522266975	EDTA-pellet
Q07954	ENSG00000123384	-0.07741222331	EDTA-pellet
Q07954	ENSG00000123384	-0.07741222331	EDTA-pellet
Q07954	ENSG00000123384	-0.07741222331	EDTA-pellet
Q07954	ENSG00000123384	-0.07741222331	EDTA-pellet
Q07954	ENSG00000123384	-0.07741222331	EDTA-pellet
Q07954	ENSG00000123384	-0.07741222331	EDTA-pellet
Q07954	ENSG00000123384	-0.07741222331	EDTA-pellet
Q07954	ENSG00000123384	-0.07741222331	EDTA-pellet
Q07954	ENSG00000123384	-0.07741222331	EDTA-pellet
Q07954	ENSG00000123384	-0.07741222331	EDTA-pellet
Q07954	ENSG00000123384	-0.07741222331	EDTA-pellet
Q07954	ENSG00000123384	-0.07741222331	EDTA-pellet
Q07954	ENSG00000123384	-0.07741222331	EDTA-pellet
Q07954	ENSG00000123384	-0.07741222331	EDTA-pellet
Q07954	ENSG00000123384	-0.07741222331	EDTA-pellet
Q07954	ENSG00000123384	-0.07741222331	EDTA-pellet
Q07954	ENSG00000123384	-0.07741222331	EDTA-pellet
Q03001	ENSG00000151914	-0.08443752179	EDTA-pellet
Q03001	ENSG00000151914	-0.08443752179	EDTA-pellet
Q03001	ENSG00000151914	-0.08443752179	EDTA-pellet
Q03001	ENSG00000151914	-0.08443752179	EDTA-pellet
Q03001	ENSG00000151914	-0.08443752179	EDTA-pellet
Q03001	ENSG00000151914	-0.08443752179	EDTA-pellet
Q03001	ENSG00000151914	-0.08443752179	EDTA-pellet
Q03001	ENSG00000151914	-0.08443752179	EDTA-pellet
Q03001	ENSG00000151914	-0.08443752179	EDTA-pellet
Q03001	ENSG00000151914	-0.08443752179	EDTA-pellet
Q03001	ENSG00000151914	-0.08443752179	EDTA-pellet
Q03001	ENSG00000151914	-0.08443752179	EDTA-pellet
Q03001	ENSG00000151914	-0.08443752179	EDTA-pellet
Q03001	ENSG00000151914	-0.08443752179	EDTA-pellet
Q03001	ENSG00000151914	-0.08443752179	EDTA-pellet
Q03001	ENSG00000151914	-0.08443752179	EDTA-pellet
Q03001	ENSG00000151914	-0.08443752179	EDTA-pellet
Q03001	ENSG00000151914	-0.08443752179	EDTA-pellet
Q03001	ENSG00000151914	-0.08443752179	EDTA-pellet
Q03001	ENSG00000151914	-0.08443752179	EDTA-pellet
Q03001	ENSG00000151914	-0.08443752179	EDTA-pellet
Q03001	ENSG00000151914	-0.08443752179	EDTA-pellet
Q03001	ENSG00000151914	-0.08443752179	EDTA-pellet
Q03001	ENSG00000151914	-0.08443752179	EDTA-pellet
Q03001	ENSG00000151914	-0.08443752179	EDTA-pellet
Q03001	ENSG00000151914	-0.08443752179	EDTA-pellet
Q03001	ENSG00000151914	-0.08443752179	EDTA-pellet
Q03001	ENSG00000151914	-0.08443752179	EDTA-pellet
Q03001	ENSG00000151914	-0.08443752179	EDTA-pellet
Q03001	ENSG00000151914	-0.08443752179	EDTA-pellet
Q03001	ENSG00000151914	-0.08443752179	EDTA-pellet
Q03001	ENSG00000151914	-0.08443752179	EDTA-pellet
Q5T4S7	ENSG00000127481	-0.08855793864	EDTA-pellet
Q5T4S7	ENSG00000127481	-0.08855793864	EDTA-pellet
Q5T4S7	ENSG00000127481	-0.08855793864	EDTA-pellet
Q5T4S7	ENSG00000127481	-0.08855793864	EDTA-pellet
Q5T4S7	ENSG00000127481	-0.08855793864	EDTA-pellet
Q5T4S7	ENSG00000127481	-0.08855793864	EDTA-pellet
Q5T4S7	ENSG00000127481	-0.08855793864	EDTA-pellet
Q5T4S7	ENSG00000127481	-0.08855793864	EDTA-pellet
Q5T4S7	ENSG00000127481	-0.08855793864	EDTA-pellet
Q5T4S7	ENSG00000127481	-0.08855793864	EDTA-pellet
Q5T4S7	ENSG00000127481	-0.08855793864	EDTA-pellet
Q5T4S7	ENSG00000127481	-0.08855793864	EDTA-pellet
Q5T4S7	ENSG00000127481	-0.08855793864	EDTA-pellet
Q5T4S7	ENSG00000127481	-0.08855793864	EDTA-pellet
Q5T4S7	ENSG00000127481	-0.08855793864	EDTA-pellet
Q5T4S7	ENSG00000127481	-0.08855793864	EDTA-pellet
Q5T4S7	ENSG00000127481	-0.08855793864	EDTA-pellet
Q5T4S7	ENSG00000127481	-0.08855793864	EDTA-pellet
Q5T4S7	ENSG00000127481	-0.08855793864	EDTA-pellet
Q5T4S7	ENSG00000127481	-0.08855793864	EDTA-pellet
Q15911	ENSG00000140836	-0.09084085859	EDTA-pellet
Q15911	ENSG00000140836	-0.09084085859	EDTA-pellet
Q15911	ENSG00000140836	-0.09084085859	EDTA-pellet
Q15911	ENSG00000140836	-0.09084085859	EDTA-pellet
Q15911	ENSG00000140836	-0.09084085859	EDTA-pellet
Q15911	ENSG00000140836	-0.09084085859	EDTA-pellet
Q15911	ENSG00000140836	-0.09084085859	EDTA-pellet
Q15911	ENSG00000140836	-0.09084085859	EDTA-pellet
Q15911	ENSG00000140836	-0.09084085859	EDTA-pellet
Q15911	ENSG00000140836	-0.09084085859	EDTA-pellet
Q15911	ENSG00000140836	-0.09084085859	EDTA-pellet
Q15911	ENSG00000140836	-0.09084085859	EDTA-pellet
Q15911	ENSG00000140836	-0.09084085859	EDTA-pellet
P0C0L5	ENSG00000228454;ENSG00000228267;ENSG00000224389;ENSG00000233312;ENSG00000236625	-0.15490196	EDTA-pellet
Q9P2D7	ENSG00000114841	-0.2430380487	EDTA-pellet
Q9P2D7	ENSG00000114841	-0.2430380487	EDTA-pellet
Q9P2D7	ENSG00000114841	-0.2430380487	EDTA-pellet
Q9P2D7	ENSG00000114841	-0.2430380487	EDTA-pellet
Q9P2D7	ENSG00000114841	-0.2430380487	EDTA-pellet
Q9P2D7	ENSG00000114841	-0.2430380487	EDTA-pellet
Q9P2D7	ENSG00000114841	-0.2430380487	EDTA-pellet
Q9P2D7	ENSG00000114841	-0.2430380487	EDTA-pellet
Q9P2D7	ENSG00000114841	-0.2430380487	EDTA-pellet
Q9P2D7	ENSG00000114841	-0.2430380487	EDTA-pellet
Q9P2D7	ENSG00000114841	-0.2430380487	EDTA-pellet
Q9P2D7	ENSG00000114841	-0.2430380487	EDTA-pellet
Q9P2D7	ENSG00000114841	-0.2430380487	EDTA-pellet
Q9P2D7	ENSG00000114841	-0.2430380487	EDTA-pellet
Q9P2D7	ENSG00000114841	-0.2430380487	EDTA-pellet
Q9P2D7	ENSG00000114841	-0.2430380487	EDTA-pellet
P0C7U3	ENSG00000206077	-0.2552725051	EDTA-pellet
Q8IVF2	ENSG00000185567	-0.3979400087	EDTA-pellet
Q8IVF2	ENSG00000185567	-0.3979400087	EDTA-pellet
Q8IVF2	ENSG00000185567	-0.3979400087	EDTA-pellet
Q8IVF2	ENSG00000185567	-0.3979400087	EDTA-pellet
Q8IVF2	ENSG00000185567	-0.3979400087	EDTA-pellet
Q8IVF2	ENSG00000185567	-0.3979400087	EDTA-pellet
Q8IVF2	ENSG00000185567	-0.3979400087	EDTA-pellet
Q8IVF2	ENSG00000185567	-0.3979400087	EDTA-pellet
Q8IVF2	ENSG00000185567	-0.3979400087	EDTA-pellet
Q8IVF2	ENSG00000185567	-0.3979400087	EDTA-pellet
Q8IVF2	ENSG00000185567	-0.3979400087	EDTA-pellet
Q8IVF2	ENSG00000185567	-0.3979400087	EDTA-pellet
Q8IVF2	ENSG00000185567	-0.3979400087	EDTA-pellet
Q8IVF2	ENSG00000185567	-0.3979400087	EDTA-pellet
Q8IVF2	ENSG00000185567	-0.3979400087	EDTA-pellet
Q8IVF2	ENSG00000185567	-0.3979400087	EDTA-pellet
Q8IVF2	ENSG00000185567	-0.3979400087	EDTA-pellet
Q8IVF2	ENSG00000185567	-0.3979400087	EDTA-pellet
Q8IVF2	ENSG00000185567	-0.3979400087	EDTA-pellet
Q8IVF2	ENSG00000185567	-0.3979400087	EDTA-pellet
Q8IVF2	ENSG00000185567	-0.3979400087	EDTA-pellet
Q8IVF2	ENSG00000185567	-0.3979400087	EDTA-pellet
Q8IVF2	ENSG00000185567	-0.3979400087	EDTA-pellet
P46821	ENSG00000131711	-0.4336555609	EDTA-pellet
Q8WXH0	ENSG00000054654	0.005180512504	EDTA-pellet
Q8WXH0	ENSG00000054654	0.005180512504	EDTA-pellet
Q8WXH0	ENSG00000054654	0.005180512504	EDTA-pellet
Q8WXH0	ENSG00000054654	0.005180512504	EDTA-pellet
Q8WXH0	ENSG00000054654	0.005180512504	EDTA-pellet
Q8WXH0	ENSG00000054654	0.005180512504	EDTA-pellet
Q8WXH0	ENSG00000054654	0.005180512504	EDTA-pellet
Q8WXH0	ENSG00000054654	0.005180512504	EDTA-pellet
Q8WXH0	ENSG00000054654	0.005180512504	EDTA-pellet
Q8WXH0	ENSG00000054654	0.005180512504	EDTA-pellet
Q8WXH0	ENSG00000054654	0.005180512504	EDTA-pellet
Q8WXH0	ENSG00000054654	0.005180512504	EDTA-pellet
Q8WXH0	ENSG00000054654	0.005180512504	EDTA-pellet
Q8WXH0	ENSG00000054654	0.005180512504	EDTA-pellet
Q8WXH0	ENSG00000054654	0.005180512504	EDTA-pellet
Q8WXH0	ENSG00000054654	0.005180512504	EDTA-pellet
Q8WXH0	ENSG00000054654	0.005180512504	EDTA-pellet
Q8WXH0	ENSG00000054654	0.005180512504	EDTA-pellet
Q8WXH0	ENSG00000054654	0.005180512504	EDTA-pellet
Q8WXH0	ENSG00000054654	0.005180512504	EDTA-pellet
Q8WXH0	ENSG00000054654	0.005180512504	EDTA-pellet
Q8WXH0	ENSG00000054654	0.005180512504	EDTA-pellet
Q8WXH0	ENSG00000054654	0.005180512504	EDTA-pellet
Q8WXH0	ENSG00000054654	0.005180512504	EDTA-pellet
Q8WXH0	ENSG00000054654	0.005180512504	EDTA-pellet
Q8WXH0	ENSG00000054654	0.005180512504	EDTA-pellet
Q8WXH0	ENSG00000054654	0.005180512504	EDTA-pellet
Q8WXH0	ENSG00000054654	0.005180512504	EDTA-pellet
Q8WXH0	ENSG00000054654	0.005180512504	EDTA-pellet
Q6ZS30	ENSG00000144426	0.009340026254	EDTA-pellet
Q7Z6B7	ENSG00000196935	0.009441556233	EDTA-pellet
Q13813	ENSG00000197694	0.009927163233	EDTA-pellet
Q96JM2	ENSG00000148143	0.01046543368	EDTA-pellet
Q9HC84	ENSG00000117983	0.01061897601	EDTA-pellet
Q9HC84	ENSG00000117983	0.01061897601	EDTA-pellet
Q9HC84	ENSG00000117983	0.01061897601	EDTA-pellet
Q9HC84	ENSG00000117983	0.01061897601	EDTA-pellet
Q9HC84	ENSG00000117983	0.01061897601	EDTA-pellet
Q9HC84	ENSG00000117983	0.01061897601	EDTA-pellet
Q9HC84	ENSG00000117983	0.01061897601	EDTA-pellet
Q9HC84	ENSG00000117983	0.01061897601	EDTA-pellet
Q9HC84	ENSG00000117983	0.01061897601	EDTA-pellet
Q9HC84	ENSG00000117983	0.01061897601	EDTA-pellet
Q9HC84	ENSG00000117983	0.01061897601	EDTA-pellet
Q9HC84	ENSG00000117983	0.01061897601	EDTA-pellet
Q9HC84	ENSG00000117983	0.01061897601	EDTA-pellet
Q9HC84	ENSG00000117983	0.01061897601	EDTA-pellet
Q9HC84	ENSG00000117983	0.01061897601	EDTA-pellet
Q9HC84	ENSG00000117983	0.01061897601	EDTA-pellet
Q9HC84	ENSG00000117983	0.01061897601	EDTA-pellet
Q9HC84	ENSG00000117983	0.01061897601	EDTA-pellet
Q9HC84	ENSG00000117983	0.01061897601	EDTA-pellet
Q9HC84	ENSG00000117983	0.01061897601	EDTA-pellet
Q9HC84	ENSG00000117983	0.01061897601	EDTA-pellet
Q9HC84	ENSG00000117983	0.01061897601	EDTA-pellet
Q9HC84	ENSG00000117983	0.01061897601	EDTA-pellet
O94964	ENSG00000149639	0.01120822159	EDTA-pellet
Q9NR99	ENSG00000101825	0.01424043911	EDTA-pellet
Q9NR99	ENSG00000101825	0.01424043911	EDTA-pellet
Q9NR99	ENSG00000101825	0.01424043911	EDTA-pellet
Q9NR99	ENSG00000101825	0.01424043911	EDTA-pellet
Q9NR99	ENSG00000101825	0.01424043911	EDTA-pellet
Q9NR99	ENSG00000101825	0.01424043911	EDTA-pellet
Q9NR99	ENSG00000101825	0.01424043911	EDTA-pellet
Q9NR99	ENSG00000101825	0.01424043911	EDTA-pellet
Q9NR99	ENSG00000101825	0.01424043911	EDTA-pellet
Q5VT06	ENSG00000135837	0.01695942312	EDTA-pellet
Q5VT06	ENSG00000135837	0.01695942312	EDTA-pellet
Q5VT06	ENSG00000135837	0.01695942312	EDTA-pellet
Q5VT06	ENSG00000135837	0.01695942312	EDTA-pellet
Q5VT06	ENSG00000135837	0.01695942312	EDTA-pellet
Q5VT06	ENSG00000135837	0.01695942312	EDTA-pellet
Q5VT06	ENSG00000135837	0.01695942312	EDTA-pellet
Q5VT06	ENSG00000135837	0.01695942312	EDTA-pellet
Q5VT06	ENSG00000135837	0.01695942312	EDTA-pellet
Q5VT06	ENSG00000135837	0.01695942312	EDTA-pellet
P48681	ENSG00000132688	0.01772876696	EDTA-pellet
Q96L91	ENSG00000183495	0.01858227752	EDTA-pellet
Q96L91	ENSG00000183495	0.01858227752	EDTA-pellet
Q96L91	ENSG00000183495	0.01858227752	EDTA-pellet
Q96L91	ENSG00000183495	0.01858227752	EDTA-pellet
Q96L91	ENSG00000183495	0.01858227752	EDTA-pellet
Q96L91	ENSG00000183495	0.01858227752	EDTA-pellet
Q96L91	ENSG00000183495	0.01858227752	EDTA-pellet
Q96L91	ENSG00000183495	0.01858227752	EDTA-pellet
Q96L91	ENSG00000183495	0.01858227752	EDTA-pellet
Q96L91	ENSG00000183495	0.01858227752	EDTA-pellet
P22681	ENSG00000110395	0.02078360592	EDTA-pellet
Q9HCE0	ENSG00000152223	0.02199429371	EDTA-pellet
Q68DE3	ENSG00000176542	0.0237142741	EDTA-pellet
Q9NR48	ENSG00000116539	0.02472262023	EDTA-pellet
Q9NR48	ENSG00000116539	0.02472262023	EDTA-pellet
Q9NR48	ENSG00000116539	0.02472262023	EDTA-pellet
Q9NR48	ENSG00000116539	0.02472262023	EDTA-pellet
Q9NR48	ENSG00000116539	0.02472262023	EDTA-pellet
Q9NR48	ENSG00000116539	0.02472262023	EDTA-pellet
Q9NR48	ENSG00000116539	0.02472262023	EDTA-pellet
Q9NR48	ENSG00000116539	0.02472262023	EDTA-pellet
Q9NR48	ENSG00000116539	0.02472262023	EDTA-pellet
Q6VAB6	ENSG00000171435	0.02482358373	EDTA-pellet
Q92617	ENSG00000169246	0.02677171988	EDTA-pellet
P49454	ENSG00000117724	0.02758352163	EDTA-pellet
P49454	ENSG00000117724	0.02758352163	EDTA-pellet
P49454	ENSG00000117724	0.02758352163	EDTA-pellet
P49454	ENSG00000117724	0.02758352163	EDTA-pellet
P49454	ENSG00000117724	0.02758352163	EDTA-pellet
P49454	ENSG00000117724	0.02758352163	EDTA-pellet
P49454	ENSG00000117724	0.02758352163	EDTA-pellet
P49454	ENSG00000117724	0.02758352163	EDTA-pellet
P49454	ENSG00000117724	0.02758352163	EDTA-pellet
P49454	ENSG00000117724	0.02758352163	EDTA-pellet
Q9NU22	ENSG00000112159;ENSG00000288121	0.02887612774	EDTA-pellet
Q9NU22	ENSG00000112159;ENSG00000288121	0.02887612774	EDTA-pellet
Q9NU22	ENSG00000112159;ENSG00000288121	0.02887612774	EDTA-pellet
Q9NU22	ENSG00000112159;ENSG00000288121	0.02887612774	EDTA-pellet
Q9NU22	ENSG00000112159;ENSG00000288121	0.02887612774	EDTA-pellet
Q9NU22	ENSG00000112159;ENSG00000288121	0.02887612774	EDTA-pellet
Q9NU22	ENSG00000112159;ENSG00000288121	0.02887612774	EDTA-pellet
Q9NU22	ENSG00000112159;ENSG00000288121	0.02887612774	EDTA-pellet
Q9NU22	ENSG00000112159;ENSG00000288121	0.02887612774	EDTA-pellet
Q9NU22	ENSG00000112159;ENSG00000288121	0.02887612774	EDTA-pellet
Q9NU22	ENSG00000112159;ENSG00000288121	0.02887612774	EDTA-pellet
Q9NU22	ENSG00000112159;ENSG00000288121	0.02887612774	EDTA-pellet
Q9NU22	ENSG00000112159;ENSG00000288121	0.02887612774	EDTA-pellet
Q9NU22	ENSG00000112159;ENSG00000288121	0.02887612774	EDTA-pellet
Q9NU22	ENSG00000112159;ENSG00000288121	0.02887612774	EDTA-pellet
Q9NU22	ENSG00000112159;ENSG00000288121	0.02887612774	EDTA-pellet
Q9NU22	ENSG00000112159;ENSG00000288121	0.02887612774	EDTA-pellet
Q9NU22	ENSG00000112159;ENSG00000288121	0.02887612774	EDTA-pellet
Q9NU22	ENSG00000112159;ENSG00000288121	0.02887612774	EDTA-pellet
Q9NU22	ENSG00000112159;ENSG00000288121	0.02887612774	EDTA-pellet
Q9NU22	ENSG00000112159;ENSG00000288121	0.02887612774	EDTA-pellet
Q9NU22	ENSG00000112159;ENSG00000288121	0.02887612774	EDTA-pellet
Q96Q15	ENSG00000157106	0.03567107994	EDTA-pellet
Q96Q15	ENSG00000157106	0.03567107994	EDTA-pellet
Q96Q15	ENSG00000157106	0.03567107994	EDTA-pellet
Q96Q15	ENSG00000157106	0.03567107994	EDTA-pellet
Q96Q15	ENSG00000157106	0.03567107994	EDTA-pellet
Q96Q15	ENSG00000157106	0.03567107994	EDTA-pellet
Q96Q15	ENSG00000157106	0.03567107994	EDTA-pellet
Q96Q15	ENSG00000157106	0.03567107994	EDTA-pellet
Q96Q15	ENSG00000157106	0.03567107994	EDTA-pellet
Q96Q15	ENSG00000157106	0.03567107994	EDTA-pellet
Q96Q15	ENSG00000157106	0.03567107994	EDTA-pellet
Q96Q15	ENSG00000157106	0.03567107994	EDTA-pellet
Q96Q15	ENSG00000157106	0.03567107994	EDTA-pellet
Q709C8	ENSG00000129003	0.03925329915	EDTA-pellet
Q709C8	ENSG00000129003	0.03925329915	EDTA-pellet
Q709C8	ENSG00000129003	0.03925329915	EDTA-pellet
Q709C8	ENSG00000129003	0.03925329915	EDTA-pellet
Q709C8	ENSG00000129003	0.03925329915	EDTA-pellet
Q709C8	ENSG00000129003	0.03925329915	EDTA-pellet
Q709C8	ENSG00000129003	0.03925329915	EDTA-pellet
Q709C8	ENSG00000129003	0.03925329915	EDTA-pellet
Q709C8	ENSG00000129003	0.03925329915	EDTA-pellet
Q709C8	ENSG00000129003	0.03925329915	EDTA-pellet
Q709C8	ENSG00000129003	0.03925329915	EDTA-pellet
Q709C8	ENSG00000129003	0.03925329915	EDTA-pellet
Q709C8	ENSG00000129003	0.03925329915	EDTA-pellet
Q9NR09	ENSG00000115760	0.03935278248	EDTA-pellet
Q9NR09	ENSG00000115760	0.03935278248	EDTA-pellet
Q9NR09	ENSG00000115760	0.03935278248	EDTA-pellet
Q9NR09	ENSG00000115760	0.03935278248	EDTA-pellet
Q9NR09	ENSG00000115760	0.03935278248	EDTA-pellet
Q9NR09	ENSG00000115760	0.03935278248	EDTA-pellet
Q9NR09	ENSG00000115760	0.03935278248	EDTA-pellet
Q9NR09	ENSG00000115760	0.03935278248	EDTA-pellet
Q9NR09	ENSG00000115760	0.03935278248	EDTA-pellet
Q9NR09	ENSG00000115760	0.03935278248	EDTA-pellet
Q9NR09	ENSG00000115760	0.03935278248	EDTA-pellet
Q9NR09	ENSG00000115760	0.03935278248	EDTA-pellet
Q9NR09	ENSG00000115760	0.03935278248	EDTA-pellet
Q9NR09	ENSG00000115760	0.03935278248	EDTA-pellet
Q9NR09	ENSG00000115760	0.03935278248	EDTA-pellet
Q9NR09	ENSG00000115760	0.03935278248	EDTA-pellet
Q9NR09	ENSG00000115760	0.03935278248	EDTA-pellet
Q9NR09	ENSG00000115760	0.03935278248	EDTA-pellet
Q9NR09	ENSG00000115760	0.03935278248	EDTA-pellet
Q14789	ENSG00000173230	0.03981797805	EDTA-pellet
Q14789	ENSG00000173230	0.03981797805	EDTA-pellet
Q14789	ENSG00000173230	0.03981797805	EDTA-pellet
Q14789	ENSG00000173230	0.03981797805	EDTA-pellet
Q14789	ENSG00000173230	0.03981797805	EDTA-pellet
Q14789	ENSG00000173230	0.03981797805	EDTA-pellet
Q14789	ENSG00000173230	0.03981797805	EDTA-pellet
Q14789	ENSG00000173230	0.03981797805	EDTA-pellet
Q14789	ENSG00000173230	0.03981797805	EDTA-pellet
Q14789	ENSG00000173230	0.03981797805	EDTA-pellet
Q14789	ENSG00000173230	0.03981797805	EDTA-pellet
O75592	ENSG00000005810	0.04061785091	EDTA-pellet
O75592	ENSG00000005810	0.04061785091	EDTA-pellet
O75592	ENSG00000005810	0.04061785091	EDTA-pellet
O75592	ENSG00000005810	0.04061785091	EDTA-pellet
O75592	ENSG00000005810	0.04061785091	EDTA-pellet
O75592	ENSG00000005810	0.04061785091	EDTA-pellet
O75592	ENSG00000005810	0.04061785091	EDTA-pellet
O75592	ENSG00000005810	0.04061785091	EDTA-pellet
O75592	ENSG00000005810	0.04061785091	EDTA-pellet
O75592	ENSG00000005810	0.04061785091	EDTA-pellet
O75592	ENSG00000005810	0.04061785091	EDTA-pellet
O75592	ENSG00000005810	0.04061785091	EDTA-pellet
O75592	ENSG00000005810	0.04061785091	EDTA-pellet
O75592	ENSG00000005810	0.04061785091	EDTA-pellet
O75592	ENSG00000005810	0.04061785091	EDTA-pellet
O75592	ENSG00000005810	0.04061785091	EDTA-pellet
O75592	ENSG00000005810	0.04061785091	EDTA-pellet
O75592	ENSG00000005810	0.04061785091	EDTA-pellet
P46013	ENSG00000148773	0.04152927723	EDTA-pellet
P46013	ENSG00000148773	0.04152927723	EDTA-pellet
P46013	ENSG00000148773	0.04152927723	EDTA-pellet
P46013	ENSG00000148773	0.04152927723	EDTA-pellet
P46013	ENSG00000148773	0.04152927723	EDTA-pellet
P46013	ENSG00000148773	0.04152927723	EDTA-pellet
P46013	ENSG00000148773	0.04152927723	EDTA-pellet
P46013	ENSG00000148773	0.04152927723	EDTA-pellet
P46013	ENSG00000148773	0.04152927723	EDTA-pellet
P46013	ENSG00000148773	0.04152927723	EDTA-pellet
P46013	ENSG00000148773	0.04152927723	EDTA-pellet
P0C0L4	ENSG00000206340;ENSG00000227746;ENSG00000244731	0.04575749056	EDTA-pellet
Q96T58	ENSG00000065526	0.04624518795	EDTA-pellet
Q96T58	ENSG00000065526	0.04624518795	EDTA-pellet
Q96T58	ENSG00000065526	0.04624518795	EDTA-pellet
Q96T58	ENSG00000065526	0.04624518795	EDTA-pellet
Q96T58	ENSG00000065526	0.04624518795	EDTA-pellet
Q96T58	ENSG00000065526	0.04624518795	EDTA-pellet
Q96T58	ENSG00000065526	0.04624518795	EDTA-pellet
Q96T58	ENSG00000065526	0.04624518795	EDTA-pellet
Q96T58	ENSG00000065526	0.04624518795	EDTA-pellet
Q96T58	ENSG00000065526	0.04624518795	EDTA-pellet
Q96T58	ENSG00000065526	0.04624518795	EDTA-pellet
Q96T58	ENSG00000065526	0.04624518795	EDTA-pellet
Q96T58	ENSG00000065526	0.04624518795	EDTA-pellet
O95714	ENSG00000128731	0.04685558086	EDTA-pellet
O95714	ENSG00000128731	0.04685558086	EDTA-pellet
O95714	ENSG00000128731	0.04685558086	EDTA-pellet
O95714	ENSG00000128731	0.04685558086	EDTA-pellet
O95714	ENSG00000128731	0.04685558086	EDTA-pellet
O95714	ENSG00000128731	0.04685558086	EDTA-pellet
O95714	ENSG00000128731	0.04685558086	EDTA-pellet
O95714	ENSG00000128731	0.04685558086	EDTA-pellet
O95714	ENSG00000128731	0.04685558086	EDTA-pellet
O95714	ENSG00000128731	0.04685558086	EDTA-pellet
O95714	ENSG00000128731	0.04685558086	EDTA-pellet
O95714	ENSG00000128731	0.04685558086	EDTA-pellet
O95714	ENSG00000128731	0.04685558086	EDTA-pellet
O95714	ENSG00000128731	0.04685558086	EDTA-pellet
O95714	ENSG00000128731	0.04685558086	EDTA-pellet
O95714	ENSG00000128731	0.04685558086	EDTA-pellet
O95714	ENSG00000128731	0.04685558086	EDTA-pellet
O95714	ENSG00000128731	0.04685558086	EDTA-pellet
O95714	ENSG00000128731	0.04685558086	EDTA-pellet
Q9UQ35	ENSG00000167978	0.0486508689	EDTA-pellet
Q9UQ35	ENSG00000167978	0.0486508689	EDTA-pellet
Q9UQ35	ENSG00000167978	0.0486508689	EDTA-pellet
Q9UQ35	ENSG00000167978	0.0486508689	EDTA-pellet
Q9UQ35	ENSG00000167978	0.0486508689	EDTA-pellet
Q9UQ35	ENSG00000167978	0.0486508689	EDTA-pellet
Q9UQ35	ENSG00000167978	0.0486508689	EDTA-pellet
Q9UQ35	ENSG00000167978	0.0486508689	EDTA-pellet
O14647	ENSG00000173575	0.05075353805	EDTA-pellet
Q12802	ENSG00000170776	0.05217801167	EDTA-pellet
Q12802	ENSG00000170776	0.05217801167	EDTA-pellet
Q12802	ENSG00000170776	0.05217801167	EDTA-pellet
Q12802	ENSG00000170776	0.05217801167	EDTA-pellet
Q12802	ENSG00000170776	0.05217801167	EDTA-pellet
Q12802	ENSG00000170776	0.05217801167	EDTA-pellet
Q12802	ENSG00000170776	0.05217801167	EDTA-pellet
Q12802	ENSG00000170776	0.05217801167	EDTA-pellet
Q12802	ENSG00000170776	0.05217801167	EDTA-pellet
Q8IZQ1	ENSG00000163625	0.0534276952	EDTA-pellet
Q8IZQ1	ENSG00000163625	0.0534276952	EDTA-pellet
Q8IZQ1	ENSG00000163625	0.0534276952	EDTA-pellet
Q8IZQ1	ENSG00000163625	0.0534276952	EDTA-pellet
Q8IZQ1	ENSG00000163625	0.0534276952	EDTA-pellet
Q8IZQ1	ENSG00000163625	0.0534276952	EDTA-pellet
Q8IZQ1	ENSG00000163625	0.0534276952	EDTA-pellet
Q8IZQ1	ENSG00000163625	0.0534276952	EDTA-pellet
Q8IZQ1	ENSG00000163625	0.0534276952	EDTA-pellet
Q8IZQ1	ENSG00000163625	0.0534276952	EDTA-pellet
Q8IZQ1	ENSG00000163625	0.0534276952	EDTA-pellet
Q8IZQ1	ENSG00000163625	0.0534276952	EDTA-pellet
Q8WZ42	ENSG00000155657	0.05435766232	EDTA-pellet
Q8WZ42	ENSG00000155657	0.05435766232	EDTA-pellet
Q8WZ42	ENSG00000155657	0.05435766232	EDTA-pellet
Q8WZ42	ENSG00000155657	0.05435766232	EDTA-pellet
Q8WZ42	ENSG00000155657	0.05435766232	EDTA-pellet
Q8WZ42	ENSG00000155657	0.05435766232	EDTA-pellet
Q8WZ42	ENSG00000155657	0.05435766232	EDTA-pellet
Q8WZ42	ENSG00000155657	0.05435766232	EDTA-pellet
Q8WZ42	ENSG00000155657	0.05435766232	EDTA-pellet
Q8WZ42	ENSG00000155657	0.05435766232	EDTA-pellet
Q8WZ42	ENSG00000155657	0.05435766232	EDTA-pellet
Q8WZ42	ENSG00000155657	0.05435766232	EDTA-pellet
Q8WZ42	ENSG00000155657	0.05435766232	EDTA-pellet
Q8WZ42	ENSG00000155657	0.05435766232	EDTA-pellet
Q8WZ42	ENSG00000155657	0.05435766232	EDTA-pellet
Q8WZ42	ENSG00000155657	0.05435766232	EDTA-pellet
Q8WZ42	ENSG00000155657	0.05435766232	EDTA-pellet
Q8WZ42	ENSG00000155657	0.05435766232	EDTA-pellet
Q8WZ42	ENSG00000155657	0.05435766232	EDTA-pellet
Q8WZ42	ENSG00000155657	0.05435766232	EDTA-pellet
Q8WZ42	ENSG00000155657	0.05435766232	EDTA-pellet
Q8WZ42	ENSG00000155657	0.05435766232	EDTA-pellet
Q8WZ42	ENSG00000155657	0.05435766232	EDTA-pellet
Q8WZ42	ENSG00000155657	0.05435766232	EDTA-pellet
Q8WZ42	ENSG00000155657	0.05435766232	EDTA-pellet
Q8WZ42	ENSG00000155657	0.05435766232	EDTA-pellet
Q8WZ42	ENSG00000155657	0.05435766232	EDTA-pellet
Q8WZ42	ENSG00000155657	0.05435766232	EDTA-pellet
Q8WZ42	ENSG00000155657	0.05435766232	EDTA-pellet
Q8WZ42	ENSG00000155657	0.05435766232	EDTA-pellet
Q8WZ42	ENSG00000155657	0.05435766232	EDTA-pellet
Q8WZ42	ENSG00000155657	0.05435766232	EDTA-pellet
Q8WZ42	ENSG00000155657	0.05435766232	EDTA-pellet
Q8WZ42	ENSG00000155657	0.05435766232	EDTA-pellet
Q8WZ42	ENSG00000155657	0.05435766232	EDTA-pellet
Q8WZ42	ENSG00000155657	0.05435766232	EDTA-pellet
Q8WZ42	ENSG00000155657	0.05435766232	EDTA-pellet
Q8WZ42	ENSG00000155657	0.05435766232	EDTA-pellet
Q8WZ42	ENSG00000155657	0.05435766232	EDTA-pellet
Q8WZ42	ENSG00000155657	0.05435766232	EDTA-pellet
Q8WZ42	ENSG00000155657	0.05435766232	EDTA-pellet
Q8WZ42	ENSG00000155657	0.05435766232	EDTA-pellet
Q8WZ42	ENSG00000155657	0.05435766232	EDTA-pellet
Q8WZ42	ENSG00000155657	0.05435766232	EDTA-pellet
Q8WZ42	ENSG00000155657	0.05435766232	EDTA-pellet
Q8WZ42	ENSG00000155657	0.05435766232	EDTA-pellet
Q8WZ42	ENSG00000155657	0.05435766232	EDTA-pellet
Q8WZ42	ENSG00000155657	0.05435766232	EDTA-pellet
Q8WZ42	ENSG00000155657	0.05435766232	EDTA-pellet
Q8WZ42	ENSG00000155657	0.05435766232	EDTA-pellet
Q8WZ42	ENSG00000155657	0.05435766232	EDTA-pellet
Q8WZ42	ENSG00000155657	0.05435766232	EDTA-pellet
Q8WZ42	ENSG00000155657	0.05435766232	EDTA-pellet
Q8WZ42	ENSG00000155657	0.05435766232	EDTA-pellet
Q8WZ42	ENSG00000155657	0.05435766232	EDTA-pellet
Q8WZ42	ENSG00000155657	0.05435766232	EDTA-pellet
Q8WZ42	ENSG00000155657	0.05435766232	EDTA-pellet
Q8WZ42	ENSG00000155657	0.05435766232	EDTA-pellet
Q8WZ42	ENSG00000155657	0.05435766232	EDTA-pellet
Q8WZ42	ENSG00000155657	0.05435766232	EDTA-pellet
Q8WZ42	ENSG00000155657	0.05435766232	EDTA-pellet
Q8WZ42	ENSG00000155657	0.05435766232	EDTA-pellet
Q8WZ42	ENSG00000155657	0.05435766232	EDTA-pellet
Q8WZ42	ENSG00000155657	0.05435766232	EDTA-pellet
Q8WZ42	ENSG00000155657	0.05435766232	EDTA-pellet
Q8WZ42	ENSG00000155657	0.05435766232	EDTA-pellet
Q8WZ42	ENSG00000155657	0.05435766232	EDTA-pellet
Q8WZ42	ENSG00000155657	0.05435766232	EDTA-pellet
Q8WZ42	ENSG00000155657	0.05435766232	EDTA-pellet
Q8WZ42	ENSG00000155657	0.05435766232	EDTA-pellet
Q8WZ42	ENSG00000155657	0.05435766232	EDTA-pellet
Q8WZ42	ENSG00000155657	0.05435766232	EDTA-pellet
Q8WZ42	ENSG00000155657	0.05435766232	EDTA-pellet
Q8WZ42	ENSG00000155657	0.05435766232	EDTA-pellet
Q8WZ42	ENSG00000155657	0.05435766232	EDTA-pellet
Q8WZ42	ENSG00000155657	0.05435766232	EDTA-pellet
Q8WZ42	ENSG00000155657	0.05435766232	EDTA-pellet
Q8WZ42	ENSG00000155657	0.05435766232	EDTA-pellet
Q8WZ42	ENSG00000155657	0.05435766232	EDTA-pellet
Q8WZ42	ENSG00000155657	0.05435766232	EDTA-pellet
Q8WZ42	ENSG00000155657	0.05435766232	EDTA-pellet
Q8WZ42	ENSG00000155657	0.05435766232	EDTA-pellet
Q8WZ42	ENSG00000155657	0.05435766232	EDTA-pellet
Q8WZ42	ENSG00000155657	0.05435766232	EDTA-pellet
Q8WZ42	ENSG00000155657	0.05435766232	EDTA-pellet
Q8WZ42	ENSG00000155657	0.05435766232	EDTA-pellet
Q8WZ42	ENSG00000155657	0.05435766232	EDTA-pellet
Q8WZ42	ENSG00000155657	0.05435766232	EDTA-pellet
Q8WZ42	ENSG00000155657	0.05435766232	EDTA-pellet
Q8WZ42	ENSG00000155657	0.05435766232	EDTA-pellet
Q8WZ42	ENSG00000155657	0.05435766232	EDTA-pellet
Q8WZ42	ENSG00000155657	0.05435766232	EDTA-pellet
Q8WZ42	ENSG00000155657	0.05435766232	EDTA-pellet
Q8WZ42	ENSG00000155657	0.05435766232	EDTA-pellet
Q8WZ42	ENSG00000155657	0.05435766232	EDTA-pellet
Q8WZ42	ENSG00000155657	0.05435766232	EDTA-pellet
Q8WZ42	ENSG00000155657	0.05435766232	EDTA-pellet
Q8WZ42	ENSG00000155657	0.05435766232	EDTA-pellet
Q8WZ42	ENSG00000155657	0.05435766232	EDTA-pellet
Q8WZ42	ENSG00000155657	0.05435766232	EDTA-pellet
Q8WZ42	ENSG00000155657	0.05435766232	EDTA-pellet
Q8WZ42	ENSG00000155657	0.05435766232	EDTA-pellet
Q8WZ42	ENSG00000155657	0.05435766232	EDTA-pellet
Q8WZ42	ENSG00000155657	0.05435766232	EDTA-pellet
Q8WZ42	ENSG00000155657	0.05435766232	EDTA-pellet
Q8WZ42	ENSG00000155657	0.05435766232	EDTA-pellet
Q8WZ42	ENSG00000155657	0.05435766232	EDTA-pellet
Q8WZ42	ENSG00000155657	0.05435766232	EDTA-pellet
Q8WZ42	ENSG00000155657	0.05435766232	EDTA-pellet
Q8WZ42	ENSG00000155657	0.05435766232	EDTA-pellet
Q8WZ42	ENSG00000155657	0.05435766232	EDTA-pellet
Q8WZ42	ENSG00000155657	0.05435766232	EDTA-pellet
Q8WZ42	ENSG00000155657	0.05435766232	EDTA-pellet
Q8WZ42	ENSG00000155657	0.05435766232	EDTA-pellet
Q8WZ42	ENSG00000155657	0.05435766232	EDTA-pellet
Q8WZ42	ENSG00000155657	0.05435766232	EDTA-pellet
Q8WZ42	ENSG00000155657	0.05435766232	EDTA-pellet
Q8WZ42	ENSG00000155657	0.05435766232	EDTA-pellet
Q8WZ42	ENSG00000155657	0.05435766232	EDTA-pellet
Q8WZ42	ENSG00000155657	0.05435766232	EDTA-pellet
Q8WZ42	ENSG00000155657	0.05435766232	EDTA-pellet
Q8WZ42	ENSG00000155657	0.05435766232	EDTA-pellet
Q8WZ42	ENSG00000155657	0.05435766232	EDTA-pellet
Q8WZ42	ENSG00000155657	0.05435766232	EDTA-pellet
Q8WZ42	ENSG00000155657	0.05435766232	EDTA-pellet
Q8WZ42	ENSG00000155657	0.05435766232	EDTA-pellet
Q8WZ42	ENSG00000155657	0.05435766232	EDTA-pellet
Q8WZ42	ENSG00000155657	0.05435766232	EDTA-pellet
Q8WZ42	ENSG00000155657	0.05435766232	EDTA-pellet
Q8WZ42	ENSG00000155657	0.05435766232	EDTA-pellet
Q8WZ42	ENSG00000155657	0.05435766232	EDTA-pellet
Q8WZ42	ENSG00000155657	0.05435766232	EDTA-pellet
Q8WZ42	ENSG00000155657	0.05435766232	EDTA-pellet
Q8WZ42	ENSG00000155657	0.05435766232	EDTA-pellet
Q8WZ42	ENSG00000155657	0.05435766232	EDTA-pellet
Q8WZ42	ENSG00000155657	0.05435766232	EDTA-pellet
Q8WZ42	ENSG00000155657	0.05435766232	EDTA-pellet
Q8WZ42	ENSG00000155657	0.05435766232	EDTA-pellet
Q8WZ42	ENSG00000155657	0.05435766232	EDTA-pellet
Q8WZ42	ENSG00000155657	0.05435766232	EDTA-pellet
Q8WZ42	ENSG00000155657	0.05435766232	EDTA-pellet
Q8WZ42	ENSG00000155657	0.05435766232	EDTA-pellet
Q8WZ42	ENSG00000155657	0.05435766232	EDTA-pellet
Q8WZ42	ENSG00000155657	0.05435766232	EDTA-pellet
Q8WZ42	ENSG00000155657	0.05435766232	EDTA-pellet
Q8WZ42	ENSG00000155657	0.05435766232	EDTA-pellet
Q8WZ42	ENSG00000155657	0.05435766232	EDTA-pellet
Q8WZ42	ENSG00000155657	0.05435766232	EDTA-pellet
Q8WZ42	ENSG00000155657	0.05435766232	EDTA-pellet
Q8WZ42	ENSG00000155657	0.05435766232	EDTA-pellet
Q8WZ42	ENSG00000155657	0.05435766232	EDTA-pellet
Q8WZ42	ENSG00000155657	0.05435766232	EDTA-pellet
Q8WZ42	ENSG00000155657	0.05435766232	EDTA-pellet
Q8WZ42	ENSG00000155657	0.05435766232	EDTA-pellet
Q8WZ42	ENSG00000155657	0.05435766232	EDTA-pellet
Q8WZ42	ENSG00000155657	0.05435766232	EDTA-pellet
Q8WZ42	ENSG00000155657	0.05435766232	EDTA-pellet
Q8WZ42	ENSG00000155657	0.05435766232	EDTA-pellet
Q8WZ42	ENSG00000155657	0.05435766232	EDTA-pellet
Q8WZ42	ENSG00000155657	0.05435766232	EDTA-pellet
Q8WZ42	ENSG00000155657	0.05435766232	EDTA-pellet
Q8WZ42	ENSG00000155657	0.05435766232	EDTA-pellet
Q8WZ42	ENSG00000155657	0.05435766232	EDTA-pellet
Q8WZ42	ENSG00000155657	0.05435766232	EDTA-pellet
Q8WZ42	ENSG00000155657	0.05435766232	EDTA-pellet
Q8WZ42	ENSG00000155657	0.05435766232	EDTA-pellet
Q5SZK8	ENSG00000150893	0.05701172077	EDTA-pellet
Q5SZK8	ENSG00000150893	0.05701172077	EDTA-pellet
Q5SZK8	ENSG00000150893	0.05701172077	EDTA-pellet
Q5SZK8	ENSG00000150893	0.05701172077	EDTA-pellet
Q5SZK8	ENSG00000150893	0.05701172077	EDTA-pellet
Q5SZK8	ENSG00000150893	0.05701172077	EDTA-pellet
Q5SZK8	ENSG00000150893	0.05701172077	EDTA-pellet
Q5SZK8	ENSG00000150893	0.05701172077	EDTA-pellet
Q5SZK8	ENSG00000150893	0.05701172077	EDTA-pellet
Q5SZK8	ENSG00000150893	0.05701172077	EDTA-pellet
Q5THK1	ENSG00000183530	0.05760676338	EDTA-pellet
Q9H4A3	ENSG00000060237	0.06138931357	EDTA-pellet
Q99996	ENSG00000127914	0.06214790675	EDTA-pellet
Q99996	ENSG00000127914	0.06214790675	EDTA-pellet
Q99996	ENSG00000127914	0.06214790675	EDTA-pellet
Q99996	ENSG00000127914	0.06214790675	EDTA-pellet
Q99996	ENSG00000127914	0.06214790675	EDTA-pellet
Q99996	ENSG00000127914	0.06214790675	EDTA-pellet
Q99996	ENSG00000127914	0.06214790675	EDTA-pellet
Q99996	ENSG00000127914	0.06214790675	EDTA-pellet
Q99996	ENSG00000127914	0.06214790675	EDTA-pellet
Q99996	ENSG00000127914	0.06214790675	EDTA-pellet
Q99996	ENSG00000127914	0.06214790675	EDTA-pellet
Q99996	ENSG00000127914	0.06214790675	EDTA-pellet
Q99996	ENSG00000127914	0.06214790675	EDTA-pellet
Q99996	ENSG00000127914	0.06214790675	EDTA-pellet
Q9Y5G3	ENSG00000254221	0.06214790675	EDTA-pellet
O95613	ENSG00000160299	0.06231332076	EDTA-pellet
O95613	ENSG00000160299	0.06231332076	EDTA-pellet
O95613	ENSG00000160299	0.06231332076	EDTA-pellet
O95613	ENSG00000160299	0.06231332076	EDTA-pellet
O95613	ENSG00000160299	0.06231332076	EDTA-pellet
O95613	ENSG00000160299	0.06231332076	EDTA-pellet
O95613	ENSG00000160299	0.06231332076	EDTA-pellet
O95613	ENSG00000160299	0.06231332076	EDTA-pellet
O95613	ENSG00000160299	0.06231332076	EDTA-pellet
O95613	ENSG00000160299	0.06231332076	EDTA-pellet
O95613	ENSG00000160299	0.06231332076	EDTA-pellet
Q86UK0	ENSG00000144452	0.06419285217	EDTA-pellet
P42345	ENSG00000198793	0.06543092603	EDTA-pellet
A0A087WVF3	ENSG00000274419	0.06694678963	EDTA-pellet
Q86XX4	ENSG00000138759	0.06694678963	EDTA-pellet
Q86XX4	ENSG00000138759	0.06694678963	EDTA-pellet
Q86XX4	ENSG00000138759	0.06694678963	EDTA-pellet
Q86XX4	ENSG00000138759	0.06694678963	EDTA-pellet
Q86XX4	ENSG00000138759	0.06694678963	EDTA-pellet
Q86XX4	ENSG00000138759	0.06694678963	EDTA-pellet
Q86XX4	ENSG00000138759	0.06694678963	EDTA-pellet
Q86XX4	ENSG00000138759	0.06694678963	EDTA-pellet
Q86XX4	ENSG00000138759	0.06694678963	EDTA-pellet
Q86XX4	ENSG00000138759	0.06694678963	EDTA-pellet
Q86XX4	ENSG00000138759	0.06694678963	EDTA-pellet
Q86XX4	ENSG00000138759	0.06694678963	EDTA-pellet
Q86XX4	ENSG00000138759	0.06694678963	EDTA-pellet
Q86XX4	ENSG00000138759	0.06694678963	EDTA-pellet
Q86XX4	ENSG00000138759	0.06694678963	EDTA-pellet
Q92793	ENSG00000005339	0.06731374739	EDTA-pellet
P31629	ENSG00000010818	0.06894354939	EDTA-pellet
P46939	ENSG00000152818	0.06894354939	EDTA-pellet
P46939	ENSG00000152818	0.06894354939	EDTA-pellet
P46939	ENSG00000152818	0.06894354939	EDTA-pellet
P46939	ENSG00000152818	0.06894354939	EDTA-pellet
P46939	ENSG00000152818	0.06894354939	EDTA-pellet
P46939	ENSG00000152818	0.06894354939	EDTA-pellet
P46939	ENSG00000152818	0.06894354939	EDTA-pellet
P46939	ENSG00000152818	0.06894354939	EDTA-pellet
P46939	ENSG00000152818	0.06894354939	EDTA-pellet
P46939	ENSG00000152818	0.06894354939	EDTA-pellet
P46939	ENSG00000152818	0.06894354939	EDTA-pellet
P46939	ENSG00000152818	0.06894354939	EDTA-pellet
P42858	ENSG00000197386	0.06927295739	EDTA-pellet
P42858	ENSG00000197386	0.06927295739	EDTA-pellet
P42858	ENSG00000197386	0.06927295739	EDTA-pellet
P42858	ENSG00000197386	0.06927295739	EDTA-pellet
P42858	ENSG00000197386	0.06927295739	EDTA-pellet
P42858	ENSG00000197386	0.06927295739	EDTA-pellet
P42858	ENSG00000197386	0.06927295739	EDTA-pellet
P42858	ENSG00000197386	0.06927295739	EDTA-pellet
P42858	ENSG00000197386	0.06927295739	EDTA-pellet
P42858	ENSG00000197386	0.06927295739	EDTA-pellet
P15924	ENSG00000096696	0.07054941902	EDTA-pellet
P15924	ENSG00000096696	0.07054941902	EDTA-pellet
P15924	ENSG00000096696	0.07054941902	EDTA-pellet
P15924	ENSG00000096696	0.07054941902	EDTA-pellet
P15924	ENSG00000096696	0.07054941902	EDTA-pellet
P15924	ENSG00000096696	0.07054941902	EDTA-pellet
P15924	ENSG00000096696	0.07054941902	EDTA-pellet
P15924	ENSG00000096696	0.07054941902	EDTA-pellet
P15924	ENSG00000096696	0.07054941902	EDTA-pellet
Q96L73	ENSG00000165671	0.07055160962	EDTA-pellet
Q07869	ENSG00000186951	0.07058107429	EDTA-pellet
O43149	ENSG00000074755	0.07140113106	EDTA-pellet
O43149	ENSG00000074755	0.07140113106	EDTA-pellet
O43149	ENSG00000074755	0.07140113106	EDTA-pellet
O43149	ENSG00000074755	0.07140113106	EDTA-pellet
O43149	ENSG00000074755	0.07140113106	EDTA-pellet
O43149	ENSG00000074755	0.07140113106	EDTA-pellet
O43149	ENSG00000074755	0.07140113106	EDTA-pellet
O43149	ENSG00000074755	0.07140113106	EDTA-pellet
O43149	ENSG00000074755	0.07140113106	EDTA-pellet
Q86TG7	ENSG00000242265	0.07255066715	EDTA-pellet
Q5HYC2	ENSG00000183354	0.07331797209	EDTA-pellet
Q09472	ENSG00000100393	0.08442430146	EDTA-pellet
Q9BV73	ENSG00000126001	0.08778141781	EDTA-pellet
Q9P2D1	ENSG00000171316	0.08808364084	EDTA-pellet
Q9P2D1	ENSG00000171316	0.08808364084	EDTA-pellet
Q9P2D1	ENSG00000171316	0.08808364084	EDTA-pellet
Q9P2D1	ENSG00000171316	0.08808364084	EDTA-pellet
Q9P2D1	ENSG00000171316	0.08808364084	EDTA-pellet
Q9P2D1	ENSG00000171316	0.08808364084	EDTA-pellet
Q9P2D1	ENSG00000171316	0.08808364084	EDTA-pellet
Q9P2D1	ENSG00000171316	0.08808364084	EDTA-pellet
Q9P2D1	ENSG00000171316	0.08808364084	EDTA-pellet
Q92614	ENSG00000196535	0.08894108334	EDTA-pellet
Q15722	ENSG00000213903;ENSG00000285456	0.09017663035	EDTA-pellet
O15027	ENSG00000148396	0.09052597571	EDTA-pellet
Q9HCU4	ENSG00000143126	0.09121126482	EDTA-pellet
Q9HCU4	ENSG00000143126	0.09121126482	EDTA-pellet
Q9HCU4	ENSG00000143126	0.09121126482	EDTA-pellet
Q9HCU4	ENSG00000143126	0.09121126482	EDTA-pellet
Q9HCU4	ENSG00000143126	0.09121126482	EDTA-pellet
Q9HCU4	ENSG00000143126	0.09121126482	EDTA-pellet
Q9HCU4	ENSG00000143126	0.09121126482	EDTA-pellet
Q9HCU4	ENSG00000143126	0.09121126482	EDTA-pellet
Q9HCU4	ENSG00000143126	0.09121126482	EDTA-pellet
Q04721	ENSG00000134250	0.09138981385	EDTA-pellet
Q6P2Q9	ENSG00000174231;ENSG00000274442	0.09320526832	EDTA-pellet
O43151	ENSG00000187605	0.09480914875	EDTA-pellet
Q71F56	ENSG00000123066	0.09516935143	EDTA-pellet
Q6P3W6	ENSG00000271425	0.09641900732	EDTA-pellet
P02461	ENSG00000168542	0.09691001301	EDTA-pellet
Q9ULX7	ENSG00000118298	0.09691001301	EDTA-pellet
Q9Y4R7	ENSG00000214021	0.09691001301	EDTA-pellet
A8MRT5	ENSG00000243716	0.0981064173	EDTA-pellet
Q8N3K9	ENSG00000164309	0.09892530424	EDTA-pellet
Q8N3K9	ENSG00000164309	0.09892530424	EDTA-pellet
Q8N3K9	ENSG00000164309	0.09892530424	EDTA-pellet
Q8N3K9	ENSG00000164309	0.09892530424	EDTA-pellet
Q8N3K9	ENSG00000164309	0.09892530424	EDTA-pellet
Q8N3K9	ENSG00000164309	0.09892530424	EDTA-pellet
Q8N3K9	ENSG00000164309	0.09892530424	EDTA-pellet
Q8N3K9	ENSG00000164309	0.09892530424	EDTA-pellet
Q8N3K9	ENSG00000164309	0.09892530424	EDTA-pellet
Q8N3K9	ENSG00000164309	0.09892530424	EDTA-pellet
Q8N3K9	ENSG00000164309	0.09892530424	EDTA-pellet
Q8N3K9	ENSG00000164309	0.09892530424	EDTA-pellet
Q8N3K9	ENSG00000164309	0.09892530424	EDTA-pellet
Q8N3K9	ENSG00000164309	0.09892530424	EDTA-pellet
Q8N3K9	ENSG00000164309	0.09892530424	EDTA-pellet
Q9ULH0	ENSG00000134313	0.09895696644	EDTA-pellet
A6NMS7	ENSG00000176681	0.1014576408	EDTA-pellet
Q9NYQ7	ENSG00000008300	0.1014576408	EDTA-pellet
Q9NYQ7	ENSG00000008300	0.1014576408	EDTA-pellet
Q9NYQ7	ENSG00000008300	0.1014576408	EDTA-pellet
Q9NYQ7	ENSG00000008300	0.1014576408	EDTA-pellet
Q9NYQ7	ENSG00000008300	0.1014576408	EDTA-pellet
Q9NYQ7	ENSG00000008300	0.1014576408	EDTA-pellet
Q9NYQ7	ENSG00000008300	0.1014576408	EDTA-pellet
Q9NYQ7	ENSG00000008300	0.1014576408	EDTA-pellet
Q9NYQ7	ENSG00000008300	0.1014576408	EDTA-pellet
Q9NYQ7	ENSG00000008300	0.1014576408	EDTA-pellet
Q9NYQ7	ENSG00000008300	0.1014576408	EDTA-pellet
O00763	ENSG00000076555	0.1026623419	EDTA-pellet
Q9HCD6	ENSG00000170921	0.1027482642	EDTA-pellet
Q7L7X3	ENSG00000160551	0.1029629958	EDTA-pellet
P14859	ENSG00000143190	0.1034299859	EDTA-pellet
P53675	ENSG00000070371	0.1035405919	EDTA-pellet
Q8NCM8	ENSG00000187240	0.1035405919	EDTA-pellet
Q8NCM8	ENSG00000187240	0.1035405919	EDTA-pellet
Q8NCM8	ENSG00000187240	0.1035405919	EDTA-pellet
Q8NCM8	ENSG00000187240	0.1035405919	EDTA-pellet
Q8NCM8	ENSG00000187240	0.1035405919	EDTA-pellet
Q8NCM8	ENSG00000187240	0.1035405919	EDTA-pellet
Q8NCM8	ENSG00000187240	0.1035405919	EDTA-pellet
Q8NCM8	ENSG00000187240	0.1035405919	EDTA-pellet
Q8NCM8	ENSG00000187240	0.1035405919	EDTA-pellet
Q8NCM8	ENSG00000187240	0.1035405919	EDTA-pellet
Q8NCM8	ENSG00000187240	0.1035405919	EDTA-pellet
Q8NCM8	ENSG00000187240	0.1035405919	EDTA-pellet
Q8NCM8	ENSG00000187240	0.1035405919	EDTA-pellet
Q8NCM8	ENSG00000187240	0.1035405919	EDTA-pellet
Q8NCM8	ENSG00000187240	0.1035405919	EDTA-pellet
Q8NCM8	ENSG00000187240	0.1035405919	EDTA-pellet
Q92766	ENSG00000124782	0.1036550154	EDTA-pellet
O95071	ENSG00000104517	0.1039718675	EDTA-pellet
O95071	ENSG00000104517	0.1039718675	EDTA-pellet
O95071	ENSG00000104517	0.1039718675	EDTA-pellet
O95071	ENSG00000104517	0.1039718675	EDTA-pellet
O95071	ENSG00000104517	0.1039718675	EDTA-pellet
O95071	ENSG00000104517	0.1039718675	EDTA-pellet
O95071	ENSG00000104517	0.1039718675	EDTA-pellet
O95071	ENSG00000104517	0.1039718675	EDTA-pellet
O75970	ENSG00000107186	0.1042092517	EDTA-pellet
Q92959	ENSG00000174640	0.1047353505	EDTA-pellet
Q93052	ENSG00000145012	0.1055101848	EDTA-pellet
E9PKD4	ENSG00000183793	0.1070640128	EDTA-pellet
Q5T011	ENSG00000198198	0.1091444694	EDTA-pellet
Q5T011	ENSG00000198198	0.1091444694	EDTA-pellet
Q5T011	ENSG00000198198	0.1091444694	EDTA-pellet
Q5T011	ENSG00000198198	0.1091444694	EDTA-pellet
Q5T011	ENSG00000198198	0.1091444694	EDTA-pellet
Q5T011	ENSG00000198198	0.1091444694	EDTA-pellet
Q5T011	ENSG00000198198	0.1091444694	EDTA-pellet
Q5T011	ENSG00000198198	0.1091444694	EDTA-pellet
Q5T011	ENSG00000198198	0.1091444694	EDTA-pellet
Q5T011	ENSG00000198198	0.1091444694	EDTA-pellet
Q5T011	ENSG00000198198	0.1091444694	EDTA-pellet
Q5T011	ENSG00000198198	0.1091444694	EDTA-pellet
Q8NDV7	ENSG00000090905;ENSG00000288130	0.1095770337	EDTA-pellet
Q6KC79	ENSG00000164190	0.1096391101	EDTA-pellet
Q6KC79	ENSG00000164190	0.1096391101	EDTA-pellet
Q6KC79	ENSG00000164190	0.1096391101	EDTA-pellet
Q6KC79	ENSG00000164190	0.1096391101	EDTA-pellet
Q6KC79	ENSG00000164190	0.1096391101	EDTA-pellet
Q6KC79	ENSG00000164190	0.1096391101	EDTA-pellet
Q6KC79	ENSG00000164190	0.1096391101	EDTA-pellet
Q6KC79	ENSG00000164190	0.1096391101	EDTA-pellet
Q6KC79	ENSG00000164190	0.1096391101	EDTA-pellet
Q99973	ENSG00000129566	0.1104124834	EDTA-pellet
Q8IVL1	ENSG00000166833	0.1139433523	EDTA-pellet
Q96JN0	ENSG00000196233	0.1151348331	EDTA-pellet
Q12830	ENSG00000171634	0.1151839976	EDTA-pellet
Q12830	ENSG00000171634	0.1151839976	EDTA-pellet
Q12830	ENSG00000171634	0.1151839976	EDTA-pellet
Q12830	ENSG00000171634	0.1151839976	EDTA-pellet
Q12830	ENSG00000171634	0.1151839976	EDTA-pellet
Q12830	ENSG00000171634	0.1151839976	EDTA-pellet
Q12830	ENSG00000171634	0.1151839976	EDTA-pellet
Q12830	ENSG00000171634	0.1151839976	EDTA-pellet
Q12830	ENSG00000171634	0.1151839976	EDTA-pellet
Q12830	ENSG00000171634	0.1151839976	EDTA-pellet
O75369	ENSG00000136068	0.1161099286	EDTA-pellet
Q93008	ENSG00000124486	0.1161883839	EDTA-pellet
C9JG80	ENSG00000185864	0.1168386596	EDTA-pellet
O15021	ENSG00000069020	0.1169359187	EDTA-pellet
Q86UY8	ENSG00000111696	0.1169698069	EDTA-pellet
O15014	ENSG00000180357	0.1171414988	EDTA-pellet
Q2PPJ7	ENSG00000188559	0.1172969943	EDTA-pellet
Q9NZJ4	ENSG00000151835	0.1174965438	EDTA-pellet
Q9NZJ4	ENSG00000151835	0.1174965438	EDTA-pellet
Q9NZJ4	ENSG00000151835	0.1174965438	EDTA-pellet
Q9NZJ4	ENSG00000151835	0.1174965438	EDTA-pellet
Q9NZJ4	ENSG00000151835	0.1174965438	EDTA-pellet
Q9NZJ4	ENSG00000151835	0.1174965438	EDTA-pellet
Q9NZJ4	ENSG00000151835	0.1174965438	EDTA-pellet
Q9NZJ4	ENSG00000151835	0.1174965438	EDTA-pellet
Q9NZJ4	ENSG00000151835	0.1174965438	EDTA-pellet
Q9NZJ4	ENSG00000151835	0.1174965438	EDTA-pellet
Q9NZJ4	ENSG00000151835	0.1174965438	EDTA-pellet
Q9NZJ4	ENSG00000151835	0.1174965438	EDTA-pellet
Q9NZJ4	ENSG00000151835	0.1174965438	EDTA-pellet
Q9NZJ4	ENSG00000151835	0.1174965438	EDTA-pellet
Q9NZJ4	ENSG00000151835	0.1174965438	EDTA-pellet
Q9NZJ4	ENSG00000151835	0.1174965438	EDTA-pellet
Q9NZJ4	ENSG00000151835	0.1174965438	EDTA-pellet
Q9H2X6	ENSG00000064393	0.1205739312	EDTA-pellet
P10071	ENSG00000106571	0.121242591	EDTA-pellet
P12109	ENSG00000142156	0.1249387366	EDTA-pellet
Q9P225	ENSG00000183914	0.1249387366	EDTA-pellet
Q9P225	ENSG00000183914	0.1249387366	EDTA-pellet
Q9P225	ENSG00000183914	0.1249387366	EDTA-pellet
Q9P225	ENSG00000183914	0.1249387366	EDTA-pellet
Q9P225	ENSG00000183914	0.1249387366	EDTA-pellet
Q9P225	ENSG00000183914	0.1249387366	EDTA-pellet
Q9P225	ENSG00000183914	0.1249387366	EDTA-pellet
Q9P225	ENSG00000183914	0.1249387366	EDTA-pellet
Q9P225	ENSG00000183914	0.1249387366	EDTA-pellet
Q9P225	ENSG00000183914	0.1249387366	EDTA-pellet
Q9P225	ENSG00000183914	0.1249387366	EDTA-pellet
Q9P225	ENSG00000183914	0.1249387366	EDTA-pellet
Q9P225	ENSG00000183914	0.1249387366	EDTA-pellet
Q9P225	ENSG00000183914	0.1249387366	EDTA-pellet
Q9P225	ENSG00000183914	0.1249387366	EDTA-pellet
Q9P225	ENSG00000183914	0.1249387366	EDTA-pellet
Q9P225	ENSG00000183914	0.1249387366	EDTA-pellet
Q9UPU5	ENSG00000162402	0.12565245	EDTA-pellet
P35580	ENSG00000133026	0.1262217345	EDTA-pellet
Q7RTP6	ENSG00000243156	0.1269824791	EDTA-pellet
O94915	ENSG00000075539	0.127678774	EDTA-pellet
O94915	ENSG00000075539	0.127678774	EDTA-pellet
O94915	ENSG00000075539	0.127678774	EDTA-pellet
O94915	ENSG00000075539	0.127678774	EDTA-pellet
O94915	ENSG00000075539	0.127678774	EDTA-pellet
O94915	ENSG00000075539	0.127678774	EDTA-pellet
O94915	ENSG00000075539	0.127678774	EDTA-pellet
O94915	ENSG00000075539	0.127678774	EDTA-pellet
O94915	ENSG00000075539	0.127678774	EDTA-pellet
O94915	ENSG00000075539	0.127678774	EDTA-pellet
A6NJU9	ENSG00000198064	0.1277137907	EDTA-pellet
Q9NQT8	ENSG00000197892	0.1280298136	EDTA-pellet
P07942	ENSG00000091136	0.1290946964	EDTA-pellet
P49750	ENSG00000119596	0.1292356782	EDTA-pellet
P35125	ENSG00000129204	0.1296338578	EDTA-pellet
Q9NYU2	ENSG00000136731	0.1307323867	EDTA-pellet
Q13085	ENSG00000275176;ENSG00000278540	0.1314696038	EDTA-pellet
P57071	ENSG00000141956	0.1321173212	EDTA-pellet
Q9H8X9	ENSG00000188818	0.1326255653	EDTA-pellet
Q13315	ENSG00000149311	0.1330566268	EDTA-pellet
Q13315	ENSG00000149311	0.1330566268	EDTA-pellet
Q13315	ENSG00000149311	0.1330566268	EDTA-pellet
Q13315	ENSG00000149311	0.1330566268	EDTA-pellet
Q13315	ENSG00000149311	0.1330566268	EDTA-pellet
Q13315	ENSG00000149311	0.1330566268	EDTA-pellet
Q13315	ENSG00000149311	0.1330566268	EDTA-pellet
Q13315	ENSG00000149311	0.1330566268	EDTA-pellet
Q13315	ENSG00000149311	0.1330566268	EDTA-pellet
Q13315	ENSG00000149311	0.1330566268	EDTA-pellet
P35670	ENSG00000123191	0.1337482574	EDTA-pellet
Q6ZU65	ENSG00000157741	0.1340003511	EDTA-pellet
Q9UPS6	ENSG00000139718	0.1359487928	EDTA-pellet
Q8IWU2	ENSG00000164715	0.1361037341	EDTA-pellet
O75962	ENSG00000038382	0.1368379599	EDTA-pellet
O75962	ENSG00000038382	0.1368379599	EDTA-pellet
O75962	ENSG00000038382	0.1368379599	EDTA-pellet
O75962	ENSG00000038382	0.1368379599	EDTA-pellet
O75962	ENSG00000038382	0.1368379599	EDTA-pellet
O75962	ENSG00000038382	0.1368379599	EDTA-pellet
O75962	ENSG00000038382	0.1368379599	EDTA-pellet
O75962	ENSG00000038382	0.1368379599	EDTA-pellet
O75962	ENSG00000038382	0.1368379599	EDTA-pellet
O75962	ENSG00000038382	0.1368379599	EDTA-pellet
Q9UIF8	ENSG00000123636	0.1376330072	EDTA-pellet
P15822	ENSG00000095951	0.137826759	EDTA-pellet
P15822	ENSG00000095951	0.137826759	EDTA-pellet
P15822	ENSG00000095951	0.137826759	EDTA-pellet
P15822	ENSG00000095951	0.137826759	EDTA-pellet
P15822	ENSG00000095951	0.137826759	EDTA-pellet
P15822	ENSG00000095951	0.137826759	EDTA-pellet
P15822	ENSG00000095951	0.137826759	EDTA-pellet
P15822	ENSG00000095951	0.137826759	EDTA-pellet
Q9BYW2	ENSG00000181555	0.1379037138	EDTA-pellet
P78325	ENSG00000151651	0.1383026982	EDTA-pellet
P50851	ENSG00000198589	0.1391791757	EDTA-pellet
P50851	ENSG00000198589	0.1391791757	EDTA-pellet
P50851	ENSG00000198589	0.1391791757	EDTA-pellet
P50851	ENSG00000198589	0.1391791757	EDTA-pellet
P50851	ENSG00000198589	0.1391791757	EDTA-pellet
P50851	ENSG00000198589	0.1391791757	EDTA-pellet
P50851	ENSG00000198589	0.1391791757	EDTA-pellet
P50851	ENSG00000198589	0.1391791757	EDTA-pellet
P50851	ENSG00000198589	0.1391791757	EDTA-pellet
F8WFD2	ENSG00000224712	0.1396619934	EDTA-pellet
A7E2F4	ENSG00000175265	0.1408154987	EDTA-pellet
Q2M2I8	ENSG00000115977	0.1413291528	EDTA-pellet
Q8NG31	ENSG00000137812	0.1417522356	EDTA-pellet
P42356	ENSG00000241973	0.1419208347	EDTA-pellet
E9PJI5	ENSG00000214967	0.1432661177	EDTA-pellet
P35579	ENSG00000100345	0.1433351355	EDTA-pellet
P16591	ENSG00000151422	0.1439065757	EDTA-pellet
Q13395	ENSG00000059588	0.1439065757	EDTA-pellet
Q9H583	ENSG00000119285	0.144492273	EDTA-pellet
Q9H792	ENSG00000173517	0.1461280357	EDTA-pellet
A6H8Y1	ENSG00000145734;ENSG00000273873	0.1467511269	EDTA-pellet
Q05DH4	ENSG00000164142	0.1471275631	EDTA-pellet
O14578	ENSG00000122966	0.1474460776	EDTA-pellet
Q9Y4G8	ENSG00000109756	0.1474460776	EDTA-pellet
Q5T2D3	ENSG00000169914	0.1476027212	EDTA-pellet
O15020	ENSG00000173898	0.1482869191	EDTA-pellet
P52746	ENSG00000115568	0.1485701854	EDTA-pellet
Q9H7D0	ENSG00000147459	0.1488042854	EDTA-pellet
Q15596	ENSG00000140396	0.1490824313	EDTA-pellet
P58107	ENSG00000261150	0.1492191127	EDTA-pellet
P58107	ENSG00000261150	0.1492191127	EDTA-pellet
P58107	ENSG00000261150	0.1492191127	EDTA-pellet
P58107	ENSG00000261150	0.1492191127	EDTA-pellet
P58107	ENSG00000261150	0.1492191127	EDTA-pellet
P58107	ENSG00000261150	0.1492191127	EDTA-pellet
P58107	ENSG00000261150	0.1492191127	EDTA-pellet
P58107	ENSG00000261150	0.1492191127	EDTA-pellet
P58107	ENSG00000261150	0.1492191127	EDTA-pellet
P58107	ENSG00000261150	0.1492191127	EDTA-pellet
P58107	ENSG00000261150	0.1492191127	EDTA-pellet
P58107	ENSG00000261150	0.1492191127	EDTA-pellet
P58107	ENSG00000261150	0.1492191127	EDTA-pellet
P58107	ENSG00000261150	0.1492191127	EDTA-pellet
P58107	ENSG00000261150	0.1492191127	EDTA-pellet
P58107	ENSG00000261150	0.1492191127	EDTA-pellet
P58107	ENSG00000261150	0.1492191127	EDTA-pellet
P58107	ENSG00000261150	0.1492191127	EDTA-pellet
P58107	ENSG00000261150	0.1492191127	EDTA-pellet
P58107	ENSG00000261150	0.1492191127	EDTA-pellet
Q9UMN6	ENSG00000272333	0.1492980825	EDTA-pellet
Q9UMN6	ENSG00000272333	0.1492980825	EDTA-pellet
Q9UMN6	ENSG00000272333	0.1492980825	EDTA-pellet
Q9UMN6	ENSG00000272333	0.1492980825	EDTA-pellet
Q9UMN6	ENSG00000272333	0.1492980825	EDTA-pellet
Q9UMN6	ENSG00000272333	0.1492980825	EDTA-pellet
Q9UMN6	ENSG00000272333	0.1492980825	EDTA-pellet
Q9UMN6	ENSG00000272333	0.1492980825	EDTA-pellet
Q92616	ENSG00000089154	0.1517959071	EDTA-pellet
Q86XP1	ENSG00000102780	0.1527430766	EDTA-pellet
Q9UJD0	ENSG00000117016	0.1528614183	EDTA-pellet
Q14690	ENSG00000148843	0.153025955	EDTA-pellet
Q9H1H9	ENSG00000137177	0.1530810161	EDTA-pellet
O75643	ENSG00000144028	0.1534834683	EDTA-pellet
E5RHQ5	ENSG00000254206	0.155752684	EDTA-pellet
Q8NFC6	ENSG00000038219	0.155752684	EDTA-pellet
Q8NFC6	ENSG00000038219	0.155752684	EDTA-pellet
Q8NFC6	ENSG00000038219	0.155752684	EDTA-pellet
Q8NFC6	ENSG00000038219	0.155752684	EDTA-pellet
Q8NFC6	ENSG00000038219	0.155752684	EDTA-pellet
Q8NFC6	ENSG00000038219	0.155752684	EDTA-pellet
Q8NFC6	ENSG00000038219	0.155752684	EDTA-pellet
Q8NFC6	ENSG00000038219	0.155752684	EDTA-pellet
Q8NFC6	ENSG00000038219	0.155752684	EDTA-pellet
Q8NFC6	ENSG00000038219	0.155752684	EDTA-pellet
P27708	ENSG00000084774	0.1564178236	EDTA-pellet
Q6PKG0	ENSG00000155506	0.1564818449	EDTA-pellet
A6NEF3	ENSG00000184206	0.1576078534	EDTA-pellet
Q9NYI0	ENSG00000156011	0.1580400589	EDTA-pellet
O14497	ENSG00000117713	0.1581605416	EDTA-pellet
Q12756	ENSG00000130294	0.1583624921	EDTA-pellet
Q15149	ENSG00000178209	0.1584931266	EDTA-pellet
Q15149	ENSG00000178209	0.1584931266	EDTA-pellet
Q15149	ENSG00000178209	0.1584931266	EDTA-pellet
Q15149	ENSG00000178209	0.1584931266	EDTA-pellet
Q15149	ENSG00000178209	0.1584931266	EDTA-pellet
Q15149	ENSG00000178209	0.1584931266	EDTA-pellet
Q15149	ENSG00000178209	0.1584931266	EDTA-pellet
Q15149	ENSG00000178209	0.1584931266	EDTA-pellet
Q15149	ENSG00000178209	0.1584931266	EDTA-pellet
Q15149	ENSG00000178209	0.1584931266	EDTA-pellet
Q15149	ENSG00000178209	0.1584931266	EDTA-pellet
Q15149	ENSG00000178209	0.1584931266	EDTA-pellet
Q15149	ENSG00000178209	0.1584931266	EDTA-pellet
Q15149	ENSG00000178209	0.1584931266	EDTA-pellet
Q15149	ENSG00000178209	0.1584931266	EDTA-pellet
Q15149	ENSG00000178209	0.1584931266	EDTA-pellet
Q15149	ENSG00000178209	0.1584931266	EDTA-pellet
Q15149	ENSG00000178209	0.1584931266	EDTA-pellet
P46531	ENSG00000148400	0.1585060843	EDTA-pellet
Q93074	ENSG00000184634	0.1586218498	EDTA-pellet
Q5UIP0	ENSG00000080345	0.1591244732	EDTA-pellet
O60237	ENSG00000077157	0.15927776	EDTA-pellet
Q86Z02	ENSG00000163349	0.1608351291	EDTA-pellet
P30622	ENSG00000130779	0.1610988948	EDTA-pellet
Q9C0H9	ENSG00000273608;ENSG00000277363	0.1613680022	EDTA-pellet
F8W0I5	ENSG00000169203	0.1617654046	EDTA-pellet
A2RRP1	ENSG00000151779	0.1623029746	EDTA-pellet
Q9HCK8	ENSG00000100888	0.1628293284	EDTA-pellet
Q9P2N4	ENSG00000163638	0.1630287862	EDTA-pellet
Q9UKJ3	ENSG00000186566	0.1630287862	EDTA-pellet
Q8WYL5	ENSG00000084112	0.16343834	EDTA-pellet
Q9UKA4	ENSG00000023516	0.1640601716	EDTA-pellet
P23634	ENSG00000058668	0.1641324577	EDTA-pellet
Q8TCU4	ENSG00000116127	0.1646316369	EDTA-pellet
Q8TCU4	ENSG00000116127	0.1646316369	EDTA-pellet
Q8TCU4	ENSG00000116127	0.1646316369	EDTA-pellet
Q8TCU4	ENSG00000116127	0.1646316369	EDTA-pellet
Q8TCU4	ENSG00000116127	0.1646316369	EDTA-pellet
Q8TCU4	ENSG00000116127	0.1646316369	EDTA-pellet
Q8TCU4	ENSG00000116127	0.1646316369	EDTA-pellet
Q8TCU4	ENSG00000116127	0.1646316369	EDTA-pellet
Q8TCU4	ENSG00000116127	0.1646316369	EDTA-pellet
Q8TCU4	ENSG00000116127	0.1646316369	EDTA-pellet
Q8TCU4	ENSG00000116127	0.1646316369	EDTA-pellet
Q8TCU4	ENSG00000116127	0.1646316369	EDTA-pellet
Q8TCU4	ENSG00000116127	0.1646316369	EDTA-pellet
Q8TCU4	ENSG00000116127	0.1646316369	EDTA-pellet
Q8TCU4	ENSG00000116127	0.1646316369	EDTA-pellet
Q92673	ENSG00000137642	0.1648102486	EDTA-pellet
P00533	ENSG00000146648	0.1669478796	EDTA-pellet
O95602	ENSG00000068654	0.1670116012	EDTA-pellet
Q7Z406	ENSG00000105357	0.1677518465	EDTA-pellet
Q8TDJ6	ENSG00000104093	0.16792247	EDTA-pellet
Q8TDJ6	ENSG00000104093	0.16792247	EDTA-pellet
Q8TDJ6	ENSG00000104093	0.16792247	EDTA-pellet
Q8TDJ6	ENSG00000104093	0.16792247	EDTA-pellet
Q8TDJ6	ENSG00000104093	0.16792247	EDTA-pellet
Q8TDJ6	ENSG00000104093	0.16792247	EDTA-pellet
Q8TDJ6	ENSG00000104093	0.16792247	EDTA-pellet
Q8TDJ6	ENSG00000104093	0.16792247	EDTA-pellet
Q8TDJ6	ENSG00000104093	0.16792247	EDTA-pellet
Q8TDJ6	ENSG00000104093	0.16792247	EDTA-pellet
Q8WWQ0	ENSG00000146247	0.1679317717	EDTA-pellet
Q12873	ENSG00000170004	0.1679839419	EDTA-pellet
P25054	ENSG00000134982	0.1687920203	EDTA-pellet
P25054	ENSG00000134982	0.1687920203	EDTA-pellet
P25054	ENSG00000134982	0.1687920203	EDTA-pellet
P25054	ENSG00000134982	0.1687920203	EDTA-pellet
P25054	ENSG00000134982	0.1687920203	EDTA-pellet
P25054	ENSG00000134982	0.1687920203	EDTA-pellet
P25054	ENSG00000134982	0.1687920203	EDTA-pellet
P25054	ENSG00000134982	0.1687920203	EDTA-pellet
P25054	ENSG00000134982	0.1687920203	EDTA-pellet
Q9UIF9	ENSG00000076108	0.1692976873	EDTA-pellet
P35658	ENSG00000126883	0.1693052697	EDTA-pellet
Q8IUD2	ENSG00000082805	0.1702617154	EDTA-pellet
Q9BQS8	ENSG00000163820	0.1705937871	EDTA-pellet
A8MQT2	ENSG00000215252	0.1713961378	EDTA-pellet
Q9HD67	ENSG00000145555	0.1713961378	EDTA-pellet
Q7Z2Z1	ENSG00000140534	0.1714955074	EDTA-pellet
Q7Z7G8	ENSG00000132549	0.1729096003	EDTA-pellet
Q7Z7G8	ENSG00000132549	0.1729096003	EDTA-pellet
Q7Z7G8	ENSG00000132549	0.1729096003	EDTA-pellet
Q7Z7G8	ENSG00000132549	0.1729096003	EDTA-pellet
Q7Z7G8	ENSG00000132549	0.1729096003	EDTA-pellet
Q7Z7G8	ENSG00000132549	0.1729096003	EDTA-pellet
Q7Z7G8	ENSG00000132549	0.1729096003	EDTA-pellet
Q7Z7G8	ENSG00000132549	0.1729096003	EDTA-pellet
Q7Z7G8	ENSG00000132549	0.1729096003	EDTA-pellet
Q7Z7G8	ENSG00000132549	0.1729096003	EDTA-pellet
Q7Z7G8	ENSG00000132549	0.1729096003	EDTA-pellet
Q7Z7G8	ENSG00000132549	0.1729096003	EDTA-pellet
Q7Z7G8	ENSG00000132549	0.1729096003	EDTA-pellet
Q7Z7G8	ENSG00000132549	0.1729096003	EDTA-pellet
Q7Z7G8	ENSG00000132549	0.1729096003	EDTA-pellet
P18583	ENSG00000159140	0.173332232	EDTA-pellet
Q5TAG4	ENSG00000268043	0.174254916	EDTA-pellet
Q9ULI3	ENSG00000173706	0.174254916	EDTA-pellet
Q6W2J9	ENSG00000183337	0.1747611065	EDTA-pellet
Q8NB46	ENSG00000139645	0.1753080407	EDTA-pellet
Q7Z333	ENSG00000107290	0.1753246314	EDTA-pellet
Q9Y520	ENSG00000117523	0.1754297289	EDTA-pellet
Q9Y520	ENSG00000117523	0.1754297289	EDTA-pellet
Q9Y520	ENSG00000117523	0.1754297289	EDTA-pellet
Q9Y520	ENSG00000117523	0.1754297289	EDTA-pellet
Q9Y520	ENSG00000117523	0.1754297289	EDTA-pellet
Q9Y520	ENSG00000117523	0.1754297289	EDTA-pellet
Q9Y520	ENSG00000117523	0.1754297289	EDTA-pellet
Q9Y520	ENSG00000117523	0.1754297289	EDTA-pellet
Q9Y520	ENSG00000117523	0.1754297289	EDTA-pellet
A6NEM1	ENSG00000197978;ENSG00000274320	0.1760912591	EDTA-pellet
B2RTY4	ENSG00000066933	0.1760912591	EDTA-pellet
Q15075	ENSG00000102189	0.1760912591	EDTA-pellet
Q8NCU4	ENSG00000163617	0.1760912591	EDTA-pellet
Q9BZ72	ENSG00000090975	0.1760912591	EDTA-pellet
Q9NZR2	ENSG00000168702	0.1760912591	EDTA-pellet
Q9NZR2	ENSG00000168702	0.1760912591	EDTA-pellet
Q9NZR2	ENSG00000168702	0.1760912591	EDTA-pellet
Q9NZR2	ENSG00000168702	0.1760912591	EDTA-pellet
Q9NZR2	ENSG00000168702	0.1760912591	EDTA-pellet
Q9NZR2	ENSG00000168702	0.1760912591	EDTA-pellet
Q9NZR2	ENSG00000168702	0.1760912591	EDTA-pellet
Q9NZR2	ENSG00000168702	0.1760912591	EDTA-pellet
Q9NZR2	ENSG00000168702	0.1760912591	EDTA-pellet
Q9NZR2	ENSG00000168702	0.1760912591	EDTA-pellet
Q9NZR2	ENSG00000168702	0.1760912591	EDTA-pellet
Q9NZR2	ENSG00000168702	0.1760912591	EDTA-pellet
Q9NZR2	ENSG00000168702	0.1760912591	EDTA-pellet
Q9NZR2	ENSG00000168702	0.1760912591	EDTA-pellet
Q9NZR2	ENSG00000168702	0.1760912591	EDTA-pellet
Q9NZR2	ENSG00000168702	0.1760912591	EDTA-pellet
Q9NZR2	ENSG00000168702	0.1760912591	EDTA-pellet
O00750	ENSG00000133056	0.1768181119	EDTA-pellet
P28324	ENSG00000158711	0.17697848	EDTA-pellet
Q13535	ENSG00000175054	0.17697848	EDTA-pellet
P51610	ENSG00000172534	0.1775811215	EDTA-pellet
Q6PJG2	ENSG00000156030	0.1794709997	EDTA-pellet
Q86XA9	ENSG00000129493	0.1799863029	EDTA-pellet
Q92794	ENSG00000083168	0.1800940015	EDTA-pellet
Q9UG01	ENSG00000138002	0.1802078253	EDTA-pellet
O75116	ENSG00000134318	0.1803912395	EDTA-pellet
Q8NI35	ENSG00000132849	0.1815541548	EDTA-pellet
Q96RV3	ENSG00000100731	0.1819734413	EDTA-pellet
P21675	ENSG00000147133	0.1822640764	EDTA-pellet
A6NM11	ENSG00000238083	0.1823402083	EDTA-pellet
O15054	ENSG00000132510	0.1823402083	EDTA-pellet
Q9ULM0	ENSG00000054690	0.1826221262	EDTA-pellet
Q14562	ENSG00000067596	0.1829306836	EDTA-pellet
Q5VST9	ENSG00000154358	0.1829306836	EDTA-pellet
Q5VST9	ENSG00000154358	0.1829306836	EDTA-pellet
Q5VST9	ENSG00000154358	0.1829306836	EDTA-pellet
Q5VST9	ENSG00000154358	0.1829306836	EDTA-pellet
Q5VST9	ENSG00000154358	0.1829306836	EDTA-pellet
Q5VST9	ENSG00000154358	0.1829306836	EDTA-pellet
Q5VST9	ENSG00000154358	0.1829306836	EDTA-pellet
Q5VST9	ENSG00000154358	0.1829306836	EDTA-pellet
Q5VST9	ENSG00000154358	0.1829306836	EDTA-pellet
Q5VST9	ENSG00000154358	0.1829306836	EDTA-pellet
Q5VST9	ENSG00000154358	0.1829306836	EDTA-pellet
Q5VST9	ENSG00000154358	0.1829306836	EDTA-pellet
Q5VST9	ENSG00000154358	0.1829306836	EDTA-pellet
Q5VST9	ENSG00000154358	0.1829306836	EDTA-pellet
Q5VST9	ENSG00000154358	0.1829306836	EDTA-pellet
Q5VST9	ENSG00000154358	0.1829306836	EDTA-pellet
Q5VST9	ENSG00000154358	0.1829306836	EDTA-pellet
Q5VST9	ENSG00000154358	0.1829306836	EDTA-pellet
Q5VST9	ENSG00000154358	0.1829306836	EDTA-pellet
Q5VST9	ENSG00000154358	0.1829306836	EDTA-pellet
Q5VST9	ENSG00000154358	0.1829306836	EDTA-pellet
Q5VST9	ENSG00000154358	0.1829306836	EDTA-pellet
Q5VST9	ENSG00000154358	0.1829306836	EDTA-pellet
Q5VST9	ENSG00000154358	0.1829306836	EDTA-pellet
Q5VST9	ENSG00000154358	0.1829306836	EDTA-pellet
Q5VST9	ENSG00000154358	0.1829306836	EDTA-pellet
Q5VST9	ENSG00000154358	0.1829306836	EDTA-pellet
Q5VST9	ENSG00000154358	0.1829306836	EDTA-pellet
Q5VST9	ENSG00000154358	0.1829306836	EDTA-pellet
Q5VST9	ENSG00000154358	0.1829306836	EDTA-pellet
Q5VST9	ENSG00000154358	0.1829306836	EDTA-pellet
Q5VST9	ENSG00000154358	0.1829306836	EDTA-pellet
Q5VST9	ENSG00000154358	0.1829306836	EDTA-pellet
Q5VST9	ENSG00000154358	0.1829306836	EDTA-pellet
A7KAX9	ENSG00000134909	0.1845244266	EDTA-pellet
Q96AY4	ENSG00000100154	0.1845244266	EDTA-pellet
Q96N67	ENSG00000116641	0.185636577	EDTA-pellet
Q15678	ENSG00000152104	0.18607548	EDTA-pellet
P85037	ENSG00000164916	0.1872994806	EDTA-pellet
Q5TDH0	ENSG00000197312	0.1877980186	EDTA-pellet
Q8IZP7	ENSG00000185352	0.1877980186	EDTA-pellet
Q96RY5	ENSG00000007545	0.1883257155	EDTA-pellet
Q14676	ENSG00000137337;ENSG00000206481;ENSG00000224587;ENSG00000225589;ENSG00000234012;ENSG00000231135;ENSG00000228575;ENSG00000237095	0.1886589551	EDTA-pellet
Q8N8U2	ENSG00000166446	0.1886589551	EDTA-pellet
Q9UPY3	ENSG00000100697	0.1889601852	EDTA-pellet
Q3L8U1	ENSG00000177200	0.1890562362	EDTA-pellet
Q3L8U1	ENSG00000177200	0.1890562362	EDTA-pellet
Q3L8U1	ENSG00000177200	0.1890562362	EDTA-pellet
Q3L8U1	ENSG00000177200	0.1890562362	EDTA-pellet
Q3L8U1	ENSG00000177200	0.1890562362	EDTA-pellet
Q3L8U1	ENSG00000177200	0.1890562362	EDTA-pellet
Q3L8U1	ENSG00000177200	0.1890562362	EDTA-pellet
Q3L8U1	ENSG00000177200	0.1890562362	EDTA-pellet
Q3L8U1	ENSG00000177200	0.1890562362	EDTA-pellet
Q75T13	ENSG00000197121	0.1898795435	EDTA-pellet
Q9UL18	ENSG00000092847	0.1901929681	EDTA-pellet
Q9UND3	ENSG00000183426	0.1906175123	EDTA-pellet
Q9UPX8	ENSG00000162105	0.1909585366	EDTA-pellet
Q9Y2G0	ENSG00000084710	0.191016937	EDTA-pellet
Q6IQ23	ENSG00000166689	0.1918855262	EDTA-pellet
Q5T5U3	ENSG00000107863	0.1922291137	EDTA-pellet
Q9H2Y7	ENSG00000103994	0.1927097711	EDTA-pellet
H3BS89	ENSG00000261115	0.193071314	EDTA-pellet
Q14980	ENSG00000137497	0.1932166196	EDTA-pellet
Q13905	ENSG00000107263	0.1932592842	EDTA-pellet
Q5TH69	ENSG00000112379	0.1934568818	EDTA-pellet
Q2KHR2	ENSG00000181827	0.1934836678	EDTA-pellet
Q9NRU3	ENSG00000119946	0.1943800448	EDTA-pellet
Q14571	ENSG00000123104	0.1945746647	EDTA-pellet
Q14571	ENSG00000123104	0.1945746647	EDTA-pellet
Q14571	ENSG00000123104	0.1945746647	EDTA-pellet
Q14571	ENSG00000123104	0.1945746647	EDTA-pellet
Q14571	ENSG00000123104	0.1945746647	EDTA-pellet
Q14571	ENSG00000123104	0.1945746647	EDTA-pellet
Q14571	ENSG00000123104	0.1945746647	EDTA-pellet
Q14571	ENSG00000123104	0.1945746647	EDTA-pellet
Q8IX01	ENSG00000064607	0.1953591693	EDTA-pellet
Q09328	ENSG00000152127	0.1959756159	EDTA-pellet
P06731	ENSG00000105388	0.1962946451	EDTA-pellet
P43235	ENSG00000143387	0.1962946451	EDTA-pellet
Q96KV7	ENSG00000161996	0.1962946451	EDTA-pellet
Q9H5K3	ENSG00000185900	0.1962946451	EDTA-pellet
O14802	ENSG00000148606	0.1967758579	EDTA-pellet
O60318	ENSG00000160294	0.1974293146	EDTA-pellet
Q7KZ85	ENSG00000109111	0.1975331283	EDTA-pellet
Q86US8	ENSG00000070366	0.1975801749	EDTA-pellet
Q5VWN6	ENSG00000108021	0.1976309369	EDTA-pellet
Q9H7P9	ENSG00000090924	0.1979196966	EDTA-pellet
Q76L83	ENSG00000143970	0.1981617782	EDTA-pellet
Q08378	ENSG00000090615	0.1983676538	EDTA-pellet
P46940	ENSG00000140575	0.198404582	EDTA-pellet
A3KMH1	ENSG00000102763	0.1985774072	EDTA-pellet
Q96IP4	ENSG00000112773	0.1988343862	EDTA-pellet
Q9UIQ6	ENSG00000113441	0.1990973082	EDTA-pellet
Q15058	ENSG00000118193	0.1992829217	EDTA-pellet
O75376	ENSG00000141027	0.1994239035	EDTA-pellet
P53794	ENSG00000198743	0.1995723549	EDTA-pellet
Q9H013	ENSG00000135074	0.1995723549	EDTA-pellet
Q8IWV7	ENSG00000159459	0.1999238681	EDTA-pellet
Q86WG5	ENSG00000133812	0.200485698	EDTA-pellet
Q86VS8	ENSG00000168172	0.2005650284	EDTA-pellet
O95479	ENSG00000049239	0.200845803	EDTA-pellet
Q96RL7	ENSG00000197969	0.2012748051	EDTA-pellet
Q96RL7	ENSG00000197969	0.2012748051	EDTA-pellet
Q96RL7	ENSG00000197969	0.2012748051	EDTA-pellet
Q96RL7	ENSG00000197969	0.2012748051	EDTA-pellet
Q96RL7	ENSG00000197969	0.2012748051	EDTA-pellet
Q96RL7	ENSG00000197969	0.2012748051	EDTA-pellet
Q96RL7	ENSG00000197969	0.2012748051	EDTA-pellet
Q96RL7	ENSG00000197969	0.2012748051	EDTA-pellet
Q96RL7	ENSG00000197969	0.2012748051	EDTA-pellet
Q96RL7	ENSG00000197969	0.2012748051	EDTA-pellet
O75691	ENSG00000120800	0.2016453635	EDTA-pellet
O75691	ENSG00000120800	0.2016453635	EDTA-pellet
O75691	ENSG00000120800	0.2016453635	EDTA-pellet
O75691	ENSG00000120800	0.2016453635	EDTA-pellet
O75691	ENSG00000120800	0.2016453635	EDTA-pellet
O75691	ENSG00000120800	0.2016453635	EDTA-pellet
O75691	ENSG00000120800	0.2016453635	EDTA-pellet
O75691	ENSG00000120800	0.2016453635	EDTA-pellet
Q9ULH7	ENSG00000186260	0.201991829	EDTA-pellet
Q96BY7	ENSG00000066739	0.2021567495	EDTA-pellet
Q86YW9	ENSG00000144893	0.2027434538	EDTA-pellet
Q13439	ENSG00000144674	0.2032435051	EDTA-pellet
Q8IZD2	ENSG00000005483	0.2034365923	EDTA-pellet
Q86V15	ENSG00000130940	0.2041199827	EDTA-pellet
Q8IZC6	ENSG00000196739	0.2041199827	EDTA-pellet
Q8N6L1	ENSG00000163463	0.2041199827	EDTA-pellet
Q8TES7	ENSG00000188878	0.2041199827	EDTA-pellet
Q969G9	ENSG00000140807	0.2041199827	EDTA-pellet
Q5T5P2	ENSG00000120549	0.2045438914	EDTA-pellet
P08069	ENSG00000140443	0.2047975404	EDTA-pellet
Q07864	ENSG00000177084	0.2059719875	EDTA-pellet
O94916	ENSG00000102908	0.2062860444	EDTA-pellet
Q96QZ7	ENSG00000151276;ENSG00000282956	0.206473888	EDTA-pellet
Q7Z3K3	ENSG00000143442	0.2065354988	EDTA-pellet
P28347	ENSG00000187079	0.2072900294	EDTA-pellet
Q70SY1	ENSG00000182158	0.2077849367	EDTA-pellet
P21359	ENSG00000196712	0.2082759424	EDTA-pellet
P21359	ENSG00000196712	0.2082759424	EDTA-pellet
P21359	ENSG00000196712	0.2082759424	EDTA-pellet
P21359	ENSG00000196712	0.2082759424	EDTA-pellet
P21359	ENSG00000196712	0.2082759424	EDTA-pellet
P21359	ENSG00000196712	0.2082759424	EDTA-pellet
P21359	ENSG00000196712	0.2082759424	EDTA-pellet
P21359	ENSG00000196712	0.2082759424	EDTA-pellet
P21359	ENSG00000196712	0.2082759424	EDTA-pellet
Q14008	ENSG00000175216	0.2088837725	EDTA-pellet
P17029	ENSG00000106261	0.2092072693	EDTA-pellet
P42694	ENSG00000198265	0.2092180133	EDTA-pellet
Q9UMZ2	ENSG00000274047;ENSG00000275066	0.2092596223	EDTA-pellet
Q9P2R3	ENSG00000185722	0.2095828784	EDTA-pellet
P45973	ENSG00000094916	0.2098374247	EDTA-pellet
Q8IWT3	ENSG00000112659	0.2101103463	EDTA-pellet
O75179	ENSG00000132466	0.2101358788	EDTA-pellet
P06213	ENSG00000171105	0.2104601607	EDTA-pellet
P07996	ENSG00000137801	0.2117718595	EDTA-pellet
Q9ULJ7	ENSG00000151458	0.2118068113	EDTA-pellet
P10275	ENSG00000169083	0.2118985992	EDTA-pellet
Q9NRY4	ENSG00000160007	0.2125872759	EDTA-pellet
Q68DK2	ENSG00000072121	0.2133803438	EDTA-pellet
P51825	ENSG00000172493	0.2140334709	EDTA-pellet
P17301	ENSG00000164171	0.214877581	EDTA-pellet
Q14669	ENSG00000153827	0.2155998003	EDTA-pellet
Q9Y485	ENSG00000172869	0.2155998003	EDTA-pellet
Q9Y485	ENSG00000172869	0.2155998003	EDTA-pellet
Q9Y485	ENSG00000172869	0.2155998003	EDTA-pellet
Q9Y485	ENSG00000172869	0.2155998003	EDTA-pellet
Q9Y485	ENSG00000172869	0.2155998003	EDTA-pellet
Q9Y485	ENSG00000172869	0.2155998003	EDTA-pellet
Q9Y485	ENSG00000172869	0.2155998003	EDTA-pellet
Q9Y485	ENSG00000172869	0.2155998003	EDTA-pellet
Q9Y485	ENSG00000172869	0.2155998003	EDTA-pellet
Q9Y485	ENSG00000172869	0.2155998003	EDTA-pellet
P11047	ENSG00000135862	0.2161154059	EDTA-pellet
Q9NRJ4	ENSG00000130338	0.2161288901	EDTA-pellet
Q8TDM6	ENSG00000151208;ENSG00000274429	0.2162858897	EDTA-pellet
Q9NUA8	ENSG00000184677	0.2163858539	EDTA-pellet
P49792	ENSG00000153201	0.2164980312	EDTA-pellet
P49792	ENSG00000153201	0.2164980312	EDTA-pellet
P49792	ENSG00000153201	0.2164980312	EDTA-pellet
P49792	ENSG00000153201	0.2164980312	EDTA-pellet
P49792	ENSG00000153201	0.2164980312	EDTA-pellet
P49792	ENSG00000153201	0.2164980312	EDTA-pellet
P49792	ENSG00000153201	0.2164980312	EDTA-pellet
P49792	ENSG00000153201	0.2164980312	EDTA-pellet
P49792	ENSG00000153201	0.2164980312	EDTA-pellet
P49792	ENSG00000153201	0.2164980312	EDTA-pellet
P49792	ENSG00000153201	0.2164980312	EDTA-pellet
Q14686	ENSG00000198646	0.2177898931	EDTA-pellet
Q96RT7	ENSG00000128159	0.2184951076	EDTA-pellet
Q5JSZ5	ENSG00000288701	0.2190635258	EDTA-pellet
Q9Y4B4	ENSG00000164080	0.2194625102	EDTA-pellet
Q9ULJ6	ENSG00000108175	0.2196321488	EDTA-pellet
P29375	ENSG00000073614	0.2199967448	EDTA-pellet
Q86X10	ENSG00000170471	0.2200815265	EDTA-pellet
O75165	ENSG00000138246	0.2201374829	EDTA-pellet
P42684	ENSG00000143322	0.2202949215	EDTA-pellet
Q99715	ENSG00000111799	0.2205695308	EDTA-pellet
Q99715	ENSG00000111799	0.2205695308	EDTA-pellet
Q99715	ENSG00000111799	0.2205695308	EDTA-pellet
Q99715	ENSG00000111799	0.2205695308	EDTA-pellet
Q99715	ENSG00000111799	0.2205695308	EDTA-pellet
Q99715	ENSG00000111799	0.2205695308	EDTA-pellet
Q99715	ENSG00000111799	0.2205695308	EDTA-pellet
Q99715	ENSG00000111799	0.2205695308	EDTA-pellet
Q99715	ENSG00000111799	0.2205695308	EDTA-pellet
Q99715	ENSG00000111799	0.2205695308	EDTA-pellet
Q14766	ENSG00000049323	0.2210655312	EDTA-pellet
O95835	ENSG00000131023	0.2218487496	EDTA-pellet
P0DMM9	ENSG00000261052	0.2218487496	EDTA-pellet
P10912	ENSG00000112964	0.2218487496	EDTA-pellet
Q5TC82	ENSG00000135870	0.2218487496	EDTA-pellet
Q7Z5N4	ENSG00000146555	0.2218487496	EDTA-pellet
Q9BUH8	ENSG00000183092	0.2218487496	EDTA-pellet
Q12789	ENSG00000077235	0.2223283681	EDTA-pellet
O15417	ENSG00000182095	0.2223812996	EDTA-pellet
O15417	ENSG00000182095	0.2223812996	EDTA-pellet
O15417	ENSG00000182095	0.2223812996	EDTA-pellet
O15417	ENSG00000182095	0.2223812996	EDTA-pellet
O15417	ENSG00000182095	0.2223812996	EDTA-pellet
O15417	ENSG00000182095	0.2223812996	EDTA-pellet
O15417	ENSG00000182095	0.2223812996	EDTA-pellet
O15417	ENSG00000182095	0.2223812996	EDTA-pellet
O15417	ENSG00000182095	0.2223812996	EDTA-pellet
O00291	ENSG00000127946	0.2224235935	EDTA-pellet
Q5T7W0	ENSG00000157657	0.222926404	EDTA-pellet
Q8TEM1	ENSG00000132182	0.2231281668	EDTA-pellet
Q9P265	ENSG00000066084	0.2233970382	EDTA-pellet
Q9Y2K7	ENSG00000173120	0.2241370962	EDTA-pellet
P49746	ENSG00000169231	0.2241899654	EDTA-pellet
Q92618	ENSG00000101493	0.2241899654	EDTA-pellet
Q9C0A6	ENSG00000168137	0.2242548194	EDTA-pellet
Q92625	ENSG00000064999	0.2243959386	EDTA-pellet
Q9Y5S2	ENSG00000198752	0.2246288793	EDTA-pellet
Q8TD26	ENSG00000124177	0.2247997994	EDTA-pellet
Q8TD26	ENSG00000124177	0.2247997994	EDTA-pellet
Q8TD26	ENSG00000124177	0.2247997994	EDTA-pellet
Q8TD26	ENSG00000124177	0.2247997994	EDTA-pellet
Q8TD26	ENSG00000124177	0.2247997994	EDTA-pellet
Q8TD26	ENSG00000124177	0.2247997994	EDTA-pellet
Q8TD26	ENSG00000124177	0.2247997994	EDTA-pellet
Q8TD26	ENSG00000124177	0.2247997994	EDTA-pellet
Q9P2E3	ENSG00000124201	0.2248336032	EDTA-pellet
Q9ULT8	ENSG00000092148	0.2253558574	EDTA-pellet
Q3T8J9	ENSG00000116580	0.2256088985	EDTA-pellet
Q7Z3U7	ENSG00000061987	0.2256920887	EDTA-pellet
A5YKK6	ENSG00000125107	0.2263963774	EDTA-pellet
Q9NZN5	ENSG00000196914	0.2270669875	EDTA-pellet
O60333	ENSG00000054523	0.2274329754	EDTA-pellet
Q9Y6J0	ENSG00000099991	0.2275258825	EDTA-pellet
Q07157	ENSG00000104067;ENSG00000277401	0.2281202591	EDTA-pellet
O95562	ENSG00000213064	0.2283053672	EDTA-pellet
P98160	ENSG00000142798	0.2284793285	EDTA-pellet
P98160	ENSG00000142798	0.2284793285	EDTA-pellet
P98160	ENSG00000142798	0.2284793285	EDTA-pellet
P98160	ENSG00000142798	0.2284793285	EDTA-pellet
P98160	ENSG00000142798	0.2284793285	EDTA-pellet
P98160	ENSG00000142798	0.2284793285	EDTA-pellet
P98160	ENSG00000142798	0.2284793285	EDTA-pellet
P98160	ENSG00000142798	0.2284793285	EDTA-pellet
P98160	ENSG00000142798	0.2284793285	EDTA-pellet
P98160	ENSG00000142798	0.2284793285	EDTA-pellet
P98160	ENSG00000142798	0.2284793285	EDTA-pellet
P98160	ENSG00000142798	0.2284793285	EDTA-pellet
P98160	ENSG00000142798	0.2284793285	EDTA-pellet
P98160	ENSG00000142798	0.2284793285	EDTA-pellet
P98160	ENSG00000142798	0.2284793285	EDTA-pellet
P98160	ENSG00000142798	0.2284793285	EDTA-pellet
Q96PV6	ENSG00000167615;ENSG00000274305;ENSG00000276681;ENSG00000276458	0.2288820123	EDTA-pellet
O76039	ENSG00000008086	0.2290273342	EDTA-pellet
Q14185	ENSG00000150760	0.2290273342	EDTA-pellet
Q5VT25	ENSG00000143776	0.2292497642	EDTA-pellet
O95948	ENSG00000119547	0.2295355783	EDTA-pellet
O60503	ENSG00000162104	0.2300264559	EDTA-pellet
Q9UPQ9	ENSG00000100354	0.2304489214	EDTA-pellet
Q9H2C0	ENSG00000261609	0.2309735373	EDTA-pellet
P20908	ENSG00000130635	0.2323141833	EDTA-pellet
Q13459	ENSG00000099331	0.2323563867	EDTA-pellet
Q6ZMZ3	ENSG00000176438	0.232572615	EDTA-pellet
Q8TF61	ENSG00000163013	0.2329961104	EDTA-pellet
Q96JI7	ENSG00000104133	0.2331849751	EDTA-pellet
Q96L92	ENSG00000143376	0.233210252	EDTA-pellet
Q8TEP8	ENSG00000101639	0.2333363538	EDTA-pellet
O14981	ENSG00000095564	0.2336305802	EDTA-pellet
Q6ZT12	ENSG00000144357	0.2338526276	EDTA-pellet
Q96PX1	ENSG00000141576	0.234083206	EDTA-pellet
Q9BY89	ENSG00000197077	0.2343472951	EDTA-pellet
Q15788	ENSG00000084676	0.2344942751	EDTA-pellet
Q9ULV1	ENSG00000174804	0.2352879072	EDTA-pellet
Q7Z4S6	ENSG00000139116	0.2359447369	EDTA-pellet
Q14573	ENSG00000096433	0.2361661572	EDTA-pellet
Q7Z7M0	ENSG00000105429	0.2366978707	EDTA-pellet
Q7Z7M0	ENSG00000105429	0.2366978707	EDTA-pellet
Q7Z7M0	ENSG00000105429	0.2366978707	EDTA-pellet
Q7Z7M0	ENSG00000105429	0.2366978707	EDTA-pellet
Q7Z7M0	ENSG00000105429	0.2366978707	EDTA-pellet
Q7Z7M0	ENSG00000105429	0.2366978707	EDTA-pellet
Q7Z7M0	ENSG00000105429	0.2366978707	EDTA-pellet
Q7Z7M0	ENSG00000105429	0.2366978707	EDTA-pellet
Q7Z7M0	ENSG00000105429	0.2366978707	EDTA-pellet
Q9NYV4	ENSG00000167258	0.23687774	EDTA-pellet
P98196	ENSG00000068650	0.2371054484	EDTA-pellet
Q6GYQ0	ENSG00000174373	0.2371202428	EDTA-pellet
Q8WYB5	ENSG00000156650;ENSG00000281813	0.2371202428	EDTA-pellet
Q9Y334	ENSG00000204396;ENSG00000234433;ENSG00000230048;ENSG00000223757;ENSG00000238203	0.2373609158	EDTA-pellet
P49815	ENSG00000103197	0.2374498468	EDTA-pellet
Q9H799	ENSG00000197603	0.2379782499	EDTA-pellet
Q9H799	ENSG00000197603	0.2379782499	EDTA-pellet
Q9H799	ENSG00000197603	0.2379782499	EDTA-pellet
Q9H799	ENSG00000197603	0.2379782499	EDTA-pellet
Q9H799	ENSG00000197603	0.2379782499	EDTA-pellet
Q9H799	ENSG00000197603	0.2379782499	EDTA-pellet
Q9H799	ENSG00000197603	0.2379782499	EDTA-pellet
Q9H799	ENSG00000197603	0.2379782499	EDTA-pellet
Q9H799	ENSG00000197603	0.2379782499	EDTA-pellet
Q9H799	ENSG00000197603	0.2379782499	EDTA-pellet
Q17RY0	ENSG00000113742	0.2382391658	EDTA-pellet
Q92621	ENSG00000155561	0.2383249439	EDTA-pellet
Q96MU6	ENSG00000170100	0.2383302033	EDTA-pellet
Q9Y2D9	ENSG00000198740	0.2385837073	EDTA-pellet
Q6ZT21	ENSG00000188167	0.2388820889	EDTA-pellet
Q8WXE9	ENSG00000140022	0.2391430048	EDTA-pellet
Q8WYQ9	ENSG00000140948	0.2391592392	EDTA-pellet
O00443	ENSG00000011405	0.2391986301	EDTA-pellet
Q9UPP1	ENSG00000172943	0.2399248133	EDTA-pellet
Q9P2R6	ENSG00000142599	0.2400158063	EDTA-pellet
Q01668	ENSG00000157388	0.2400735697	EDTA-pellet
Q6DN90	ENSG00000144711	0.2400735697	EDTA-pellet
Q8N8Y5	ENSG00000181638	0.2400735697	EDTA-pellet
Q9UKV8	ENSG00000123908	0.2401472383	EDTA-pellet
Q5VV67	ENSG00000148840	0.2402629946	EDTA-pellet
Q9HCJ0	ENSG00000078687	0.2407340938	EDTA-pellet
Q6ZNJ1	ENSG00000160796	0.2408427897	EDTA-pellet
Q6ZNJ1	ENSG00000160796	0.2408427897	EDTA-pellet
Q6ZNJ1	ENSG00000160796	0.2408427897	EDTA-pellet
Q6ZNJ1	ENSG00000160796	0.2408427897	EDTA-pellet
Q6ZNJ1	ENSG00000160796	0.2408427897	EDTA-pellet
Q6ZNJ1	ENSG00000160796	0.2408427897	EDTA-pellet
Q6ZNJ1	ENSG00000160796	0.2408427897	EDTA-pellet
Q6ZNJ1	ENSG00000160796	0.2408427897	EDTA-pellet
P50748	ENSG00000184445	0.2411149703	EDTA-pellet
Q14667	ENSG00000007202	0.2416275964	EDTA-pellet
Q14693	ENSG00000134324	0.2426375927	EDTA-pellet
Q14997	ENSG00000068878	0.2427410952	EDTA-pellet
A1X283	ENSG00000174705	0.2430380487	EDTA-pellet
O75051	ENSG00000076356	0.2430380487	EDTA-pellet
P08514	ENSG00000005961	0.2430380487	EDTA-pellet
Q04656	ENSG00000165240	0.2430380487	EDTA-pellet
Q4KWH8	ENSG00000114805	0.2430380487	EDTA-pellet
Q9UQ26	ENSG00000176406	0.2430380487	EDTA-pellet
Q8NCN5	ENSG00000090857	0.2434330414	EDTA-pellet
P30825	ENSG00000139514	0.2436386866	EDTA-pellet
Q9UGU0	ENSG00000100207;ENSG00000262024;ENSG00000276461;ENSG00000280467;ENSG00000281897;ENSG00000282892;ENSG00000283026;ENSG00000283681	0.2441251443	EDTA-pellet
Q14671	ENSG00000134644	0.2445993247	EDTA-pellet
Q9NW08	ENSG00000013503	0.2447116326	EDTA-pellet
Q9Y3R5	ENSG00000142197	0.2448589926	EDTA-pellet
Q86VI3	ENSG00000183856	0.2449928659	EDTA-pellet
Q9P2M7	ENSG00000143375	0.2449928659	EDTA-pellet
Q9ULI0	ENSG00000119778	0.2457271872	EDTA-pellet
O95405	ENSG00000157077	0.2458072046	EDTA-pellet
Q9UHB7	ENSG00000072364	0.2461701918	EDTA-pellet
Q76I76	ENSG00000141298	0.2461813277	EDTA-pellet
O43157	ENSG00000164050	0.2462080955	EDTA-pellet
Q9NRL2	ENSG00000198604	0.2463787919	EDTA-pellet
Q9NSI6	ENSG00000185658	0.2464243776	EDTA-pellet
Q9BRZ2	ENSG00000169871	0.2466723333	EDTA-pellet
Q6BDS2	ENSG00000065060	0.2468510186	EDTA-pellet
Q70EL1	ENSG00000166348	0.2471546149	EDTA-pellet
Q9UPW6	ENSG00000119042	0.2477844837	EDTA-pellet
Q14999	ENSG00000044090	0.2479086921	EDTA-pellet
Q5VWJ9	ENSG00000148158	0.2480014682	EDTA-pellet
Q96M96	ENSG00000139132	0.2483236451	EDTA-pellet
Q96PV0	ENSG00000227460;ENSG00000197283	0.2487903776	EDTA-pellet
Q9P203	ENSG00000011114;ENSG00000277222	0.2491786887	EDTA-pellet
Q92538	ENSG00000107862	0.2495580216	EDTA-pellet
Q9NZM1	ENSG00000138119	0.2497334525	EDTA-pellet
Q01804	ENSG00000164164	0.2498774732	EDTA-pellet
Q05586	ENSG00000176884	0.2498774732	EDTA-pellet
Q14674	ENSG00000135476	0.2505911866	EDTA-pellet
P55196	ENSG00000130396	0.2508124456	EDTA-pellet
Q6AI39	ENSG00000112624	0.2509376521	EDTA-pellet
Q13838	ENSG00000215425;ENSG00000198563;ENSG00000225073;ENSG00000225859;ENSG00000229496;ENSG00000235439;ENSG00000230624	0.2509705885	EDTA-pellet
Q7LBC6	ENSG00000120733	0.2511559389	EDTA-pellet
P49327	ENSG00000169710	0.2514615942	EDTA-pellet
Q9UGH3	ENSG00000089057	0.2514712162	EDTA-pellet
Q9Y2I7	ENSG00000115020	0.2526081134	EDTA-pellet
P24588	ENSG00000179841	0.2527253161	EDTA-pellet
P48634	ENSG00000204469;ENSG00000206427;ENSG00000226618;ENSG00000231370;ENSG00000231825;ENSG00000225164;ENSG00000225748	0.252853031	EDTA-pellet
Q8N3C0	ENSG00000112249	0.252853031	EDTA-pellet
Q9P2D3	ENSG00000008869	0.2533572011	EDTA-pellet
O95359	ENSG00000138162	0.2536053457	EDTA-pellet
O95359	ENSG00000138162	0.2536053457	EDTA-pellet
O95359	ENSG00000138162	0.2536053457	EDTA-pellet
O95359	ENSG00000138162	0.2536053457	EDTA-pellet
O95359	ENSG00000138162	0.2536053457	EDTA-pellet
O95359	ENSG00000138162	0.2536053457	EDTA-pellet
O95359	ENSG00000138162	0.2536053457	EDTA-pellet
O95359	ENSG00000138162	0.2536053457	EDTA-pellet
O95359	ENSG00000138162	0.2536053457	EDTA-pellet
O75417	ENSG00000051341	0.254033433	EDTA-pellet
P12270	ENSG00000047410	0.2542047861	EDTA-pellet
Q8TEQ0	ENSG00000048471	0.2543345037	EDTA-pellet
Q9Y490	ENSG00000137076	0.2544871622	EDTA-pellet
P80192	ENSG00000006432	0.2545178664	EDTA-pellet
Q9BZ29	ENSG00000088387	0.2545178664	EDTA-pellet
Q93050	ENSG00000033627	0.254729976	EDTA-pellet
Q8TF72	ENSG00000138771	0.2547848077	EDTA-pellet
P16471	ENSG00000113494	0.2551258088	EDTA-pellet
P04275	ENSG00000110799	0.2552725051	EDTA-pellet
P04275	ENSG00000110799	0.2552725051	EDTA-pellet
P04275	ENSG00000110799	0.2552725051	EDTA-pellet
P04275	ENSG00000110799	0.2552725051	EDTA-pellet
P04275	ENSG00000110799	0.2552725051	EDTA-pellet
P04275	ENSG00000110799	0.2552725051	EDTA-pellet
P04275	ENSG00000110799	0.2552725051	EDTA-pellet
P04275	ENSG00000110799	0.2552725051	EDTA-pellet
P04275	ENSG00000110799	0.2552725051	EDTA-pellet
Q12965	ENSG00000157483	0.2552725051	EDTA-pellet
Q460N5	ENSG00000173193	0.2552725051	EDTA-pellet
Q13873	ENSG00000204217	0.2556838662	EDTA-pellet
P21333	ENSG00000196924	0.2558500244	EDTA-pellet
Q6ZU35	ENSG00000109265	0.2563202607	EDTA-pellet
Q9P2F8	ENSG00000116991	0.2563202607	EDTA-pellet
Q9UHF7	ENSG00000104447	0.2564623537	EDTA-pellet
Q1KMD3	ENSG00000214753	0.2567471907	EDTA-pellet
Q9NZV1	ENSG00000150938	0.2567913982	EDTA-pellet
O94887	ENSG00000006607	0.2568263332	EDTA-pellet
P51826	ENSG00000144218	0.25712451	EDTA-pellet
Q05823	ENSG00000135828	0.2575643019	EDTA-pellet
Q9H2G4	ENSG00000184205	0.2575643019	EDTA-pellet
Q7Z460	ENSG00000074054	0.2578048416	EDTA-pellet
Q9UHV7	ENSG00000108510	0.2578730786	EDTA-pellet
O15516	ENSG00000134852	0.2583517808	EDTA-pellet
Q9NZM3	ENSG00000198399	0.2586618372	EDTA-pellet
O14795	ENSG00000198722	0.2594484458	EDTA-pellet
Q14767	ENSG00000119681	0.2596373105	EDTA-pellet
O15085	ENSG00000132694	0.2600487691	EDTA-pellet
Q8N4W9	ENSG00000198482	0.2615214544	EDTA-pellet
Q86UW6	ENSG00000078177	0.2616842639	EDTA-pellet
O60524	ENSG00000165525	0.2618778717	EDTA-pellet
O60244	ENSG00000180182	0.2628383772	EDTA-pellet
O75882	ENSG00000088812	0.2629613351	EDTA-pellet
Q99666	ENSG00000015568;ENSG00000183054	0.2630020221	EDTA-pellet
P0DJD0	ENSG00000187627	0.2632414348	EDTA-pellet
O95425	ENSG00000197321	0.2637056726	EDTA-pellet
Q7Z2W4	ENSG00000105939	0.2638050877	EDTA-pellet
P51795	ENSG00000171365	0.2640464294	EDTA-pellet
Q9ULH1	ENSG00000153317	0.2640607481	EDTA-pellet
Q14202	ENSG00000147130	0.2640806514	EDTA-pellet
O75581	ENSG00000070018;ENSG00000281324	0.2641586357	EDTA-pellet
O15265	ENSG00000163635	0.2643071886	EDTA-pellet
O00712	ENSG00000147862	0.2644011003	EDTA-pellet
Q7Z7A1	ENSG00000119397	0.264817823	EDTA-pellet
Q9Y4D7	ENSG00000004399	0.2648833818	EDTA-pellet
P55268	ENSG00000172037	0.2650487386	EDTA-pellet
Q68CP9	ENSG00000189079	0.2652511305	EDTA-pellet
O60287	ENSG00000142207	0.2653144434	EDTA-pellet
Q9HCG1	ENSG00000170949	0.2654916703	EDTA-pellet
P0DJD1	ENSG00000185304	0.2662678894	EDTA-pellet
Q6IQ55	ENSG00000128881	0.2662678894	EDTA-pellet
Q8TF20	ENSG00000182903	0.2662678894	EDTA-pellet
Q6YHK3	ENSG00000156535	0.2671717284	EDTA-pellet
P29400	ENSG00000188153	0.2674213947	EDTA-pellet
P51587	ENSG00000139618	0.2681961425	EDTA-pellet
P51587	ENSG00000139618	0.2681961425	EDTA-pellet
P51587	ENSG00000139618	0.2681961425	EDTA-pellet
P51587	ENSG00000139618	0.2681961425	EDTA-pellet
P51587	ENSG00000139618	0.2681961425	EDTA-pellet
P51587	ENSG00000139618	0.2681961425	EDTA-pellet
P51587	ENSG00000139618	0.2681961425	EDTA-pellet
P51587	ENSG00000139618	0.2681961425	EDTA-pellet
P51587	ENSG00000139618	0.2681961425	EDTA-pellet
P51587	ENSG00000139618	0.2681961425	EDTA-pellet
P51587	ENSG00000139618	0.2681961425	EDTA-pellet
P51587	ENSG00000139618	0.2681961425	EDTA-pellet
Q9Y618	ENSG00000196498	0.2682622361	EDTA-pellet
O14512	ENSG00000274229;ENSG00000274211	0.2688453123	EDTA-pellet
Q5VYV7	ENSG00000149346	0.2693669874	EDTA-pellet
O60437	ENSG00000118898	0.269715933	EDTA-pellet
Q9UJQ4	ENSG00000101115	0.2699957619	EDTA-pellet
P06756	ENSG00000138448	0.2702160482	EDTA-pellet
Q8WXG9	ENSG00000164199	0.2705406735	EDTA-pellet
Q8WXG9	ENSG00000164199	0.2705406735	EDTA-pellet
Q8WXG9	ENSG00000164199	0.2705406735	EDTA-pellet
Q8WXG9	ENSG00000164199	0.2705406735	EDTA-pellet
Q8WXG9	ENSG00000164199	0.2705406735	EDTA-pellet
Q8WXG9	ENSG00000164199	0.2705406735	EDTA-pellet
Q8WXG9	ENSG00000164199	0.2705406735	EDTA-pellet
Q8WXG9	ENSG00000164199	0.2705406735	EDTA-pellet
Q8WXG9	ENSG00000164199	0.2705406735	EDTA-pellet
Q8WXG9	ENSG00000164199	0.2705406735	EDTA-pellet
Q8WXG9	ENSG00000164199	0.2705406735	EDTA-pellet
Q8WXG9	ENSG00000164199	0.2705406735	EDTA-pellet
Q8WXG9	ENSG00000164199	0.2705406735	EDTA-pellet
Q8WXG9	ENSG00000164199	0.2705406735	EDTA-pellet
Q8WXG9	ENSG00000164199	0.2705406735	EDTA-pellet
Q8WXG9	ENSG00000164199	0.2705406735	EDTA-pellet
Q8WXG9	ENSG00000164199	0.2705406735	EDTA-pellet
Q8WXG9	ENSG00000164199	0.2705406735	EDTA-pellet
Q8WXG9	ENSG00000164199	0.2705406735	EDTA-pellet
Q8WXG9	ENSG00000164199	0.2705406735	EDTA-pellet
Q8WXG9	ENSG00000164199	0.2705406735	EDTA-pellet
Q8WXG9	ENSG00000164199	0.2705406735	EDTA-pellet
Q8WXG9	ENSG00000164199	0.2705406735	EDTA-pellet
Q8WXG9	ENSG00000164199	0.2705406735	EDTA-pellet
Q8WXG9	ENSG00000164199	0.2705406735	EDTA-pellet
Q8WXG9	ENSG00000164199	0.2705406735	EDTA-pellet
P17032	ENSG00000075407	0.2706473667	EDTA-pellet
Q96PE2	ENSG00000110237	0.2706473667	EDTA-pellet
Q567U6	ENSG00000125633	0.2710667723	EDTA-pellet
Q5HYW3	ENSG00000242732	0.2710667723	EDTA-pellet
Q9H7F0	ENSG00000133657	0.2721458562	EDTA-pellet
Q1L5Z9	ENSG00000170500	0.2724179349	EDTA-pellet
Q9Y2E4	ENSG00000151240	0.2726346241	EDTA-pellet
Q5VVJ2	ENSG00000162601	0.2730012721	EDTA-pellet
Q9Y426	ENSG00000157617	0.2730012721	EDTA-pellet
P0C7T5	ENSG00000224470	0.2732256557	EDTA-pellet
O60303	ENSG00000047578	0.273446474	EDTA-pellet
Q9Y6D5	ENSG00000124198	0.2741159411	EDTA-pellet
Q2KHR3	ENSG00000060749	0.2743099265	EDTA-pellet
Q68BL7	ENSG00000185585	0.2747010569	EDTA-pellet
Q9HCP0	ENSG00000169118	0.2752764448	EDTA-pellet
Q8TD17	ENSG00000197024	0.2755591771	EDTA-pellet
Q6VMQ6	ENSG00000171681	0.27600199	EDTA-pellet
P33527	ENSG00000103222;ENSG00000278183	0.276092349	EDTA-pellet
Q9Y6D6	ENSG00000066777	0.2762064119	EDTA-pellet
Q96T23	ENSG00000048649	0.2764407224	EDTA-pellet
O15230	ENSG00000130702	0.2766974176	EDTA-pellet
O15230	ENSG00000130702	0.2766974176	EDTA-pellet
O15230	ENSG00000130702	0.2766974176	EDTA-pellet
O15230	ENSG00000130702	0.2766974176	EDTA-pellet
O15230	ENSG00000130702	0.2766974176	EDTA-pellet
O15230	ENSG00000130702	0.2766974176	EDTA-pellet
O15230	ENSG00000130702	0.2766974176	EDTA-pellet
O15230	ENSG00000130702	0.2766974176	EDTA-pellet
O15230	ENSG00000130702	0.2766974176	EDTA-pellet
O15230	ENSG00000130702	0.2766974176	EDTA-pellet
O15230	ENSG00000130702	0.2766974176	EDTA-pellet
O15230	ENSG00000130702	0.2766974176	EDTA-pellet
O15230	ENSG00000130702	0.2766974176	EDTA-pellet
Q8WXI9	ENSG00000143614;ENSG00000261992	0.2767614209	EDTA-pellet
Q9ULV0	ENSG00000167306	0.2769571372	EDTA-pellet
O43524	ENSG00000118689	0.2771178383	EDTA-pellet
Q8IZR5	ENSG00000183723	0.2774301752	EDTA-pellet
Q96JN8	ENSG00000215041;ENSG00000288301	0.2775488998	EDTA-pellet
Q9Y6R4	ENSG00000085511	0.2776891532	EDTA-pellet
Q9ULK4	ENSG00000112282	0.2777289183	EDTA-pellet
P10586	ENSG00000142949	0.2788589228	EDTA-pellet
Q4ADV7	ENSG00000107036	0.2791615808	EDTA-pellet
P40222	ENSG00000084652	0.2792688802	EDTA-pellet
Q8WXG6	ENSG00000110514	0.2795148535	EDTA-pellet
A7E2V4	ENSG00000214655	0.2796919401	EDTA-pellet
Q6P2E9	ENSG00000038358	0.2797796959	EDTA-pellet
Q5SW79	ENSG00000143702;ENSG00000276725	0.2798406966	EDTA-pellet
Q8IZP9	ENSG00000173698	0.2798406966	EDTA-pellet
Q9C091	ENSG00000141449	0.2799873929	EDTA-pellet
O75410	ENSG00000147526	0.2801345067	EDTA-pellet
Q96SQ5	ENSG00000198466	0.2801798567	EDTA-pellet
P52630	ENSG00000170581	0.2805083285	EDTA-pellet
Q6ZVD8	ENSG00000040199	0.2805083285	EDTA-pellet
Q9UN71	ENSG00000253953	0.2808266096	EDTA-pellet
Q92854	ENSG00000187764	0.2811957507	EDTA-pellet
Q9UPT8	ENSG00000130749	0.2811957507	EDTA-pellet
O94985	ENSG00000171603	0.2812704466	EDTA-pellet
P08651	ENSG00000141905	0.2813158177	EDTA-pellet
Q9BWH6	ENSG00000103932	0.2814344396	EDTA-pellet
Q8NB90	ENSG00000145375	0.2817248405	EDTA-pellet
O00592	ENSG00000128567	0.2818315336	EDTA-pellet
O60610	ENSG00000131504	0.2819580187	EDTA-pellet
O14715	ENSG00000169629	0.2820067584	EDTA-pellet
O95180	ENSG00000196557	0.2823412983	EDTA-pellet
[truncated: 9,162 more rows]
