# Supplementary material
Source: HighWire-hosted journal article supplement (doi:10.1101/rna.079755.123)
Supplement: Supplemental_Table_S7.xlsx [file Supplemental_Table_S7.xlsx]

## Sheet: EDTA-pellet_all_GOs
GO biological process complete	Homo sapiens - REFLIST (20589)	polysome_table.txt (1439)	polysome_table.txt (expected)	polysome_table.txt (over/under)	polysome_table.txt (fold Enrichment)	polysome_table.txt (raw P-value)	polysome_table.txt (FDR)
regulation of nucleobase-containing compound metabolic process (GO:0019219)	4059	640	410.45	+	1.56	1.19E-29	6.22E-26
regulation of biosynthetic process (GO:0009889)	4155	638	420.16	+	1.52	1.27E-26	1.33E-23
multicellular organism development (GO:0007275)	4129	631	417.53	+	1.51	8.19E-26	5.83E-23
regulation of cellular biosynthetic process (GO:0031326)	4095	628	414.09	+	1.52	4.47E-26	3.34E-23
regulation of macromolecule biosynthetic process (GO:0010556)	3932	617	397.61	+	1.55	6.73E-28	9.59E-25
regulation of RNA metabolic process (GO:0051252)	3753	600	379.51	+	1.58	7.94E-29	1.56E-25
system development (GO:0048731)	3719	585	376.07	+	1.56	2.36E-26	1.95E-23
regulation of RNA biosynthetic process (GO:2001141)	3465	554	350.39	+	1.58	2.78E-26	2.18E-23
regulation of nucleic acid-templated transcription (GO:1903506)	3456	554	349.48	+	1.59	1.77E-26	1.54E-23
regulation of transcription, DNA-templated (GO:0006355)	3455	554	349.38	+	1.59	1.74E-26	1.61E-23
organelle organization (GO:0006996)	3424	554	346.24	+	1.60	2.28E-27	2.75E-24
positive regulation of macromolecule metabolic process (GO:0010604)	3507	538	354.63	+	1.52	1.07E-21	4.78E-19
positive regulation of cellular metabolic process (GO:0031325)	3329	524	336.63	+	1.56	3.49E-23	1.82E-20
positive regulation of nitrogen compound metabolic process (GO:0051173)	3142	497	317.73	+	1.56	2.85E-22	1.35E-19
regulation of transcription by RNA polymerase II (GO:0006357)	2619	441	264.84	+	1.67	3.68E-24	2.31E-21
regulation of developmental process (GO:0050793)	2463	411	249.06	+	1.65	1.03E-21	4.77E-19
regulation of cellular component organization (GO:0051128)	2345	399	237.13	+	1.68	2.13E-22	1.04E-19
nervous system development (GO:0007399)	2081	366	210.43	+	1.74	1.21E-22	6.10E-20
positive regulation of nucleobase-containing compound metabolic process (GO:0045935)	2034	366	205.68	+	1.78	3.35E-24	2.19E-21
anatomical structure morphogenesis (GO:0009653)	2185	364	220.95	+	1.65	5.28E-19	1.76E-16
positive regulation of biosynthetic process (GO:0009891)	2062	345	208.51	+	1.65	2.88E-18	9.21E-16
positive regulation of cellular biosynthetic process (GO:0031328)	2024	339	204.67	+	1.66	5.69E-18	1.78E-15
positive regulation of RNA metabolic process (GO:0051254)	1828	338	184.85	+	1.83	6.74E-24	3.77E-21
positive regulation of macromolecule biosynthetic process (GO:0010557)	1920	333	194.15	+	1.72	1.22E-19	4.45E-17
positive regulation of RNA biosynthetic process (GO:1902680)	1702	311	172.11	+	1.81	2.77E-21	1.11E-18
positive regulation of nucleic acid-templated transcription (GO:1903508)	1696	311	171.50	+	1.81	1.66E-21	7.01E-19
positive regulation of transcription, DNA-templated (GO:0045893)	1696	311	171.50	+	1.81	1.66E-21	6.83E-19
protein localization (GO:0008104)	1880	291	190.11	+	1.53	1.11E-11	1.93E-09
cell development (GO:0048468)	1668	277	168.67	+	1.64	2.93E-14	6.85E-12
regulation of intracellular signal transduction (GO:1902531)	1704	265	172.31	+	1.54	6.96E-11	1.03E-08
negative regulation of biosynthetic process (GO:0009890)	1610	261	162.81	+	1.60	2.23E-12	4.21E-10
negative regulation of cellular biosynthetic process (GO:0031327)	1581	260	159.87	+	1.63	6.00E-13	1.27E-10
negative regulation of macromolecule biosynthetic process (GO:0010558)	1522	252	153.91	+	1.64	8.49E-13	1.75E-10
establishment of localization in cell (GO:0051649)	1631	250	164.93	+	1.52	9.79E-10	1.19E-07
negative regulation of nucleobase-containing compound metabolic process (GO:0045934)	1551	245	156.84	+	1.56	1.06E-10	1.55E-08
regulation of cell differentiation (GO:0045595)	1568	244	158.56	+	1.54	4.96E-10	6.48E-08
movement of cell or subcellular component (GO:0006928)	1480	241	149.66	+	1.61	1.30E-11	2.18E-09
cytoskeleton organization (GO:0007010)	1217	231	123.07	+	1.88	1.80E-17	5.52E-15
positive regulation of transcription by RNA polymerase II (GO:0045944)	1251	228	126.50	+	1.80	1.96E-15	5.11E-13
intracellular signal transduction (GO:0035556)	1475	227	149.15	+	1.52	4.39E-09	4.84E-07
regulation of multicellular organismal development (GO:2000026)	1356	224	137.12	+	1.63	2.39E-11	3.82E-09
negative regulation of RNA metabolic process (GO:0051253)	1427	220	144.30	+	1.52	7.34E-09	7.82E-07
positive regulation of developmental process (GO:0051094)	1314	211	132.87	+	1.59	8.33E-10	1.03E-07
intracellular transport (GO:0046907)	1343	210	135.81	+	1.55	6.34E-09	6.85E-07
negative regulation of RNA biosynthetic process (GO:1902679)	1317	209	133.18	+	1.57	2.67E-09	3.05E-07
negative regulation of nucleic acid-templated transcription (GO:1903507)	1315	209	132.98	+	1.57	2.00E-09	2.33E-07
negative regulation of transcription, DNA-templated (GO:0045892)	1313	209	132.77	+	1.57	1.93E-09	2.25E-07
neurogenesis (GO:0022008)	1223	209	123.67	+	1.69	7.20E-12	1.30E-09
regulation of organelle organization (GO:0033043)	1185	203	119.83	+	1.69	1.35E-11	2.25E-09
cell cycle (GO:0007049)	1224	202	123.77	+	1.63	2.40E-10	3.38E-08
chromosome organization (GO:0051276)	942	199	95.26	+	2.09	2.77E-19	9.66E-17
locomotion (GO:0040011)	1244	194	125.80	+	1.54	2.98E-08	2.92E-06
cell projection organization (GO:0030030)	1131	194	114.37	+	1.70	3.69E-11	5.67E-09
generation of neurons (GO:0048699)	1081	189	109.31	+	1.73	1.48E-11	2.44E-09
plasma membrane bounded cell projection organization (GO:0120036)	1082	188	109.41	+	1.72	2.92E-11	4.62E-09
positive regulation of cellular component organization (GO:0051130)	1047	188	105.87	+	1.78	2.52E-12	4.70E-10
regulation of cellular component movement (GO:0051270)	1052	186	106.38	+	1.75	1.15E-11	1.98E-09
central nervous system development (GO:0007417)	1000	182	101.12	+	1.80	1.87E-12	3.65E-10
embryo development (GO:0009790)	1044	178	105.57	+	1.69	3.96E-10	5.26E-08
regulation of cell cycle (GO:0051726)	1122	176	113.46	+	1.55	1.04E-07	9.41E-06
neuron differentiation (GO:0030182)	1018	175	102.94	+	1.70	3.45E-10	4.70E-08
regulation of cellular component biogenesis (GO:0044087)	957	173	96.77	+	1.79	1.28E-11	2.18E-09
regulation of locomotion (GO:0040012)	1021	172	103.25	+	1.67	1.81E-09	2.15E-07
cellular response to endogenous stimulus (GO:0071495)	1078	170	109.01	+	1.56	1.37E-07	1.19E-05
regulation of cell motility (GO:2000145)	976	170	98.70	+	1.72	2.25E-10	3.24E-08
cell adhesion (GO:0007155)	964	168	97.48	+	1.72	3.43E-10	4.71E-08
regulation of cell migration (GO:0030334)	918	166	92.83	+	1.79	3.29E-11	5.16E-09
localization of cell (GO:0051674)	1032	164	104.36	+	1.57	1.36E-07	1.20E-05
cell motility (GO:0048870)	1032	164	104.36	+	1.57	1.36E-07	1.19E-05
epithelium development (GO:0060429)	1054	162	106.58	+	1.52	1.12E-06	8.18E-05
regulation of anatomical structure morphogenesis (GO:0022603)	928	162	93.84	+	1.73	6.61E-10	8.42E-08
circulatory system development (GO:0072359)	890	162	90.00	+	1.80	3.63E-11	5.63E-09
anatomical structure formation involved in morphogenesis (GO:0048646)	913	158	92.32	+	1.71	1.89E-09	2.23E-07
tube development (GO:0035295)	864	158	87.37	+	1.81	4.30E-11	6.54E-09
phosphorylation (GO:0016310)	915	157	92.53	+	1.70	2.84E-09	3.20E-07
head development (GO:0060322)	804	157	81.30	+	1.93	5.62E-13	1.21E-10
regulation of catabolic process (GO:0009894)	1005	156	101.63	+	1.54	1.10E-06	8.04E-05
animal organ morphogenesis (GO:0009887)	988	154	99.91	+	1.54	9.27E-07	6.95E-05
negative regulation of transcription by RNA polymerase II (GO:0000122)	969	154	97.99	+	1.57	3.27E-07	2.68E-05
peptidyl-amino acid modification (GO:0018193)	890	148	90.00	+	1.64	5.79E-08	5.47E-06
cell cycle process (GO:0022402)	821	147	83.02	+	1.77	8.48E-10	1.04E-07
neuron development (GO:0048666)	819	147	82.82	+	1.77	8.02E-10	9.97E-08
brain development (GO:0007420)	757	147	76.55	+	1.92	5.37E-12	9.79E-10
cell morphogenesis (GO:0000902)	686	145	69.37	+	2.09	2.30E-14	5.45E-12
cell migration (GO:0016477)	873	144	88.28	+	1.63	1.49E-07	1.28E-05
negative regulation of developmental process (GO:0051093)	898	143	90.81	+	1.57	8.94E-07	6.77E-05
chromatin organization (GO:0006325)	590	143	59.66	+	2.40	2.70E-18	8.80E-16
regulation of cell adhesion (GO:0030155)	773	141	78.17	+	1.80	6.09E-10	7.83E-08
microtubule-based process (GO:0007017)	794	140	80.29	+	1.74	5.50E-09	5.98E-07
regulation of protein localization (GO:0032880)	847	136	85.65	+	1.59	1.07E-06	7.90E-05
regulation of cellular catabolic process (GO:0031329)	866	135	87.57	+	1.54	5.24E-06	3.44E-04
protein phosphorylation (GO:0006468)	722	135	73.01	+	1.85	3.65E-10	4.93E-08
cellular response to DNA damage stimulus (GO:0006974)	734	131	74.22	+	1.76	9.02E-09	9.48E-07
tube morphogenesis (GO:0035239)	666	128	67.35	+	1.90	2.55E-10	3.56E-08
neuron projection development (GO:0031175)	656	128	66.34	+	1.93	1.26E-10	1.83E-08
regulation of cell cycle process (GO:0010564)	727	120	73.52	+	1.63	1.47E-06	1.05E-04
actin filament-based process (GO:0030029)	610	120	61.68	+	1.95	2.55E-10	3.54E-08
embryo development ending in birth or egg hatching (GO:0009792)	665	119	67.25	+	1.77	4.80E-08	4.59E-06
regulation of cellular localization (GO:0060341)	748	116	75.64	+	1.53	3.15E-05	1.64E-03
chordate embryonic development (GO:0043009)	644	115	65.12	+	1.77	8.74E-08	7.97E-06
enzyme-linked receptor protein signaling pathway (GO:0007167)	608	114	61.48	+	1.85	8.70E-09	9.21E-07
cell morphogenesis involved in differentiation (GO:0000904)	535	114	54.10	+	2.11	1.11E-11	1.95E-09
cellular component morphogenesis (GO:0032989)	582	112	58.85	+	1.90	3.00E-09	3.36E-07
regulation of cellular response to stress (GO:0080135)	709	111	71.70	+	1.55	3.38E-05	1.75E-03
regulation of cell projection organization (GO:0031344)	639	111	64.62	+	1.72	4.41E-07	3.56E-05
actin cytoskeleton organization (GO:0030036)	544	111	55.01	+	2.02	2.39E-10	3.40E-08
mitotic cell cycle (GO:0000278)	611	110	61.79	+	1.78	1.23E-07	1.09E-05
cell junction organization (GO:0034330)	487	110	49.25	+	2.23	1.24E-12	2.49E-10
negative regulation of cellular component organization (GO:0051129)	683	109	69.07	+	1.58	1.87E-05	1.04E-03
negative regulation of cell differentiation (GO:0045596)	662	108	66.94	+	1.61	8.01E-06	4.94E-04
histone modification (GO:0016570)	401	107	40.55	+	2.64	2.85E-16	8.26E-14
heart development (GO:0007507)	538	106	54.40	+	1.95	2.71E-09	3.08E-07
regulation of plasma membrane bounded cell projection organization (GO:0120035)	623	104	63.00	+	1.65	5.82E-06	3.72E-04
tissue morphogenesis (GO:0048729)	560	104	56.63	+	1.84	5.57E-08	5.29E-06
embryonic morphogenesis (GO:0048598)	586	103	59.26	+	1.74	8.24E-07	6.33E-05
regulation of cytoskeleton organization (GO:0051493)	535	103	54.10	+	1.90	1.30E-08	1.35E-06
cellular response to nitrogen compound (GO:1901699)	633	102	64.01	+	1.59	2.26E-05	1.24E-03
microtubule cytoskeleton organization (GO:0000226)	532	102	53.80	+	1.90	1.80E-08	1.82E-06
cell part morphogenesis (GO:0032990)	489	102	49.45	+	2.06	4.77E-10	6.29E-08
vasculature development (GO:0001944)	530	99	53.59	+	1.85	1.13E-07	1.01E-05
cell projection morphogenesis (GO:0048858)	470	99	47.53	+	2.08	5.80E-10	7.51E-08
blood vessel development (GO:0001568)	508	98	51.37	+	1.91	2.89E-08	2.85E-06
plasma membrane bounded cell projection morphogenesis (GO:0120039)	466	98	47.12	+	2.08	7.93E-10	9.94E-08
cell-cell adhesion (GO:0098609)	540	97	54.61	+	1.78	6.40E-07	4.99E-05
neuron projection morphogenesis (GO:0048812)	462	97	46.72	+	2.08	7.33E-10	9.26E-08
supramolecular fiber organization (GO:0097435)	573	96	57.94	+	1.66	1.20E-05	6.99E-04
hemopoiesis (GO:0030097)	617	95	62.39	+	1.52	2.10E-04	8.16E-03
cellular response to organonitrogen compound (GO:0071417)	568	95	57.44	+	1.65	1.15E-05	6.77E-04
positive regulation of cellular component movement (GO:0051272)	564	94	57.03	+	1.65	1.46E-05	8.35E-04
positive regulation of locomotion (GO:0040017)	566	93	57.24	+	1.62	2.73E-05	1.45E-03
mitotic cell cycle process (GO:1903047)	519	93	52.48	+	1.77	1.18E-06	8.54E-05
cell division (GO:0051301)	508	93	51.37	+	1.81	6.17E-07	4.88E-05
regulation of cell development (GO:0060284)	496	93	50.16	+	1.85	2.18E-07	1.86E-05
positive regulation of hydrolase activity (GO:0051345)	575	92	58.15	+	1.58	7.40E-05	3.47E-03
positive regulation of cell motility (GO:2000147)	550	92	55.62	+	1.65	1.58E-05	8.96E-04
regulation of DNA metabolic process (GO:0051052)	538	92	54.40	+	1.69	9.02E-06	5.46E-04
positive regulation of cellular component biogenesis (GO:0044089)	497	92	50.26	+	1.83	4.72E-07	3.80E-05
positive regulation of cell migration (GO:0030335)	526	91	53.19	+	1.71	5.42E-06	3.52E-04
regulation of small GTPase mediated signal transduction (GO:0051056)	308	90	31.15	+	2.89	5.27E-16	1.45E-13
sensory organ development (GO:0007423)	574	88	58.04	+	1.52	4.67E-04	1.57E-02
skeletal system development (GO:0001501)	509	88	51.47	+	1.71	1.01E-05	6.12E-04
morphogenesis of an epithelium (GO:0002009)	453	88	45.81	+	1.92	1.44E-07	1.25E-05
positive regulation of catabolic process (GO:0009896)	517	87	52.28	+	1.66	2.29E-05	1.25E-03
positive regulation of protein localization (GO:1903829)	461	87	46.62	+	1.87	4.09E-07	3.34E-05
cell morphogenesis involved in neuron differentiation (GO:0048667)	422	87	42.67	+	2.04	1.43E-08	1.47E-06
DNA repair (GO:0006281)	490	86	49.55	+	1.74	7.02E-06	4.44E-04
regulation of GTPase activity (GO:0043087)	365	86	36.91	+	2.33	5.49E-11	8.19E-09
positive regulation of organelle organization (GO:0010638)	510	83	51.57	+	1.61	1.22E-04	5.24E-03
regulation of mitotic cell cycle (GO:0007346)	508	83	51.37	+	1.62	9.04E-05	4.11E-03
regulation of nervous system development (GO:0051960)	437	83	44.19	+	1.88	6.72E-07	5.21E-05
regulation of establishment of protein localization (GO:0070201)	526	81	53.19	+	1.52	6.03E-04	1.93E-02
axon development (GO:0061564)	389	80	39.34	+	2.03	6.33E-08	5.94E-06
response to growth factor (GO:0070848)	487	79	49.25	+	1.60	1.61E-04	6.61E-03
positive regulation of cellular catabolic process (GO:0031331)	449	78	45.40	+	1.72	2.39E-05	1.30E-03
regulation of supramolecular fiber organization (GO:1902903)	382	78	38.63	+	2.02	1.20E-07	1.07E-05
growth (GO:0040007)	377	78	38.12	+	2.05	6.55E-08	6.11E-06
developmental growth (GO:0048589)	377	78	38.12	+	2.05	6.55E-08	6.08E-06
transmembrane receptor protein tyrosine kinase signaling pathway (GO:0007169)	408	77	41.26	+	1.87	2.15E-06	1.52E-04
forebrain development (GO:0030900)	380	77	38.43	+	2.00	1.76E-07	1.51E-05
cellular response to hormone stimulus (GO:0032870)	485	76	49.04	+	1.55	6.22E-04	1.99E-02
regulation of neuron projection development (GO:0010975)	432	75	43.68	+	1.72	3.39E-05	1.75E-03
muscle structure development (GO:0061061)	480	74	48.54	+	1.52	1.01E-03	3.00E-02
regulation of cell cycle phase transition (GO:1901987)	446	74	45.10	+	1.64	1.53E-04	6.32E-03
blood vessel morphogenesis (GO:0048514)	421	74	42.57	+	1.74	2.70E-05	1.44E-03
positive regulation of cell projection organization (GO:0031346)	340	74	34.38	+	2.15	2.34E-08	2.34E-06
response to peptide (GO:1901652)	434	73	43.89	+	1.66	1.25E-04	5.31E-03
regulation of actin filament-based process (GO:0032970)	399	73	40.35	+	1.81	1.13E-05	6.70E-04
axonogenesis (GO:0007409)	350	72	35.39	+	2.03	2.40E-07	2.02E-05
cellular response to growth factor stimulus (GO:0071363)	457	71	46.21	+	1.54	1.29E-03	3.62E-02
gland development (GO:0048732)	406	69	41.06	+	1.68	1.44E-04	6.00E-03
synapse organization (GO:0050808)	294	69	29.73	+	2.32	6.38E-09	6.84E-07
regulation of cell morphogenesis (GO:0022604)	308	67	31.15	+	2.15	1.09E-07	9.83E-06
in utero embryonic development (GO:0001701)	388	66	39.24	+	1.68	1.99E-04	7.79E-03
regulation of neurogenesis (GO:0050767)	358	66	36.20	+	1.82	1.93E-05	1.07E-03
peptidyl-lysine modification (GO:0018205)	307	66	31.04	+	2.13	2.65E-07	2.21E-05
regulation of protein-containing complex assembly (GO:0043254)	410	65	41.46	+	1.57	1.24E-03	3.51E-02
chromatin remodeling (GO:0006338)	275	65	27.81	+	2.34	1.18E-08	1.23E-06
plasma membrane bounded cell projection assembly (GO:0120031)	405	64	40.95	+	1.56	1.53E-03	4.17E-02
epithelial tube morphogenesis (GO:0060562)	311	64	31.45	+	2.04	1.26E-06	9.08E-05
sensory system development (GO:0048880)	386	63	39.03	+	1.61	6.76E-04	2.11E-02
visual system development (GO:0150063)	380	63	38.43	+	1.64	4.57E-04	1.54E-02
eye development (GO:0001654)	376	63	38.02	+	1.66	4.17E-04	1.43E-02
regulation of actin cytoskeleton organization (GO:0032956)	358	63	36.20	+	1.74	1.12E-04	4.93E-03
cell junction assembly (GO:0034329)	266	62	26.90	+	2.30	3.82E-08	3.68E-06
microtubule-based movement (GO:0007018)	379	61	38.33	+	1.59	1.10E-03	3.20E-02
regulation of Wnt signaling pathway (GO:0030111)	346	61	34.99	+	1.74	1.27E-04	5.38E-03
negative regulation of organelle organization (GO:0010639)	342	61	34.58	+	1.76	1.12E-04	4.93E-03
urogenital system development (GO:0001655)	339	61	34.28	+	1.78	7.60E-05	3.56E-03
positive regulation of GTPase activity (GO:0043547)	274	61	27.71	+	2.20	2.65E-07	2.20E-05
establishment of organelle localization (GO:0051656)	374	60	37.82	+	1.59	1.36E-03	3.79E-02
positive regulation of cell development (GO:0010720)	296	60	29.93	+	2.00	4.32E-06	2.90E-04
regulation of response to DNA damage stimulus (GO:2001020)	310	59	31.35	+	1.88	2.46E-05	1.33E-03
regulation of intracellular transport (GO:0032386)	342	58	34.58	+	1.68	4.51E-04	1.52E-02
regulation of developmental growth (GO:0048638)	320	58	32.36	+	1.79	9.94E-05	4.44E-03
response to peptide hormone (GO:0043434)	353	57	35.70	+	1.60	1.77E-03	4.70E-02
regulation of autophagy (GO:0010506)	340	57	34.38	+	1.66	7.93E-04	2.44E-02
renal system development (GO:0072001)	301	57	30.44	+	1.87	4.12E-05	2.08E-03
negative regulation of locomotion (GO:0040013)	336	56	33.98	+	1.65	1.01E-03	3.00E-02
regulation of cellular response to growth factor stimulus (GO:0090287)	311	56	31.45	+	1.78	1.64E-04	6.69E-03
kidney development (GO:0001822)	292	56	29.53	+	1.90	3.27E-05	1.70E-03
positive regulation of nervous system development (GO:0051962)	268	56	27.10	+	2.07	3.83E-06	2.58E-04
camera-type eye development (GO:0043010)	326	55	32.97	+	1.67	8.55E-04	2.60E-02
negative regulation of catabolic process (GO:0009895)	325	55	32.86	+	1.67	8.41E-04	2.56E-02
positive regulation of establishment of protein localization (GO:1904951)	320	55	32.36	+	1.70	5.55E-04	1.80E-02
negative regulation of cell adhesion (GO:0007162)	287	55	29.02	+	1.90	4.14E-05	2.08E-03
cellular response to peptide (GO:1901653)	299	54	30.24	+	1.79	1.83E-04	7.25E-03
negative regulation of cellular component movement (GO:0051271)	309	53	31.25	+	1.70	6.44E-04	2.04E-02
regulation of transmembrane receptor protein serine/threonine kinase signaling pathway (GO:0090092)	273	53	27.61	+	1.92	4.12E-05	2.08E-03
negative regulation of cell motility (GO:2000146)	301	52	30.44	+	1.71	7.49E-04	2.31E-02
negative regulation of cell migration (GO:0030336)	286	52	28.92	+	1.80	1.99E-04	7.80E-03
regulation of actin filament organization (GO:0110053)	275	52	27.81	+	1.87	9.63E-05	4.35E-03
positive regulation of protein transport (GO:0051222)	304	51	30.74	+	1.66	1.51E-03	4.12E-02
positive regulation of DNA metabolic process (GO:0051054)	302	51	30.54	+	1.67	1.10E-03	3.19E-02
Golgi vesicle transport (GO:0048193)	293	51	29.63	+	1.72	6.46E-04	2.04E-02
telencephalon development (GO:0021537)	250	51	25.28	+	2.02	1.89E-05	1.05E-03
regulation of chromosome organization (GO:0033044)	250	51	25.28	+	2.02	1.89E-05	1.05E-03
heart morphogenesis (GO:0003007)	246	51	24.88	+	2.05	1.11E-05	6.64E-04
nucleocytoplasmic transport (GO:0006913)	238	51	24.07	+	2.12	4.98E-06	3.29E-04
nuclear transport (GO:0051169)	238	51	24.07	+	2.12	4.98E-06	3.28E-04
cell-cell signaling by wnt (GO:0198738)	282	50	28.52	+	1.75	5.11E-04	1.70E-02
Wnt signaling pathway (GO:0016055)	282	50	28.52	+	1.75	5.11E-04	1.70E-02
regulation of microtubule-based process (GO:0032886)	259	50	26.19	+	1.91	9.03E-05	4.12E-03
rhythmic process (GO:0048511)	267	49	27.00	+	1.81	2.57E-04	9.51E-03
regulation of canonical Wnt signaling pathway (GO:0060828)	270	48	27.30	+	1.76	5.73E-04	1.84E-02
cell-cell adhesion via plasma-membrane adhesion molecules (GO:0098742)	264	48	26.70	+	1.80	3.52E-04	1.23E-02
positive regulation of neurogenesis (GO:0050769)	220	48	22.25	+	2.16	9.00E-06	5.47E-04
regulation of cell-substrate adhesion (GO:0010810)	216	48	21.84	+	2.20	4.54E-06	3.02E-04
regulation of cell junction assembly (GO:1901888)	199	48	20.12	+	2.39	6.02E-07	4.79E-05
regulation of Ras protein signal transduction (GO:0046578)	192	48	19.42	+	2.47	2.23E-07	1.89E-05
small GTPase mediated signal transduction (GO:0007264)	264	47	26.70	+	1.76	6.98E-04	2.17E-02
neuron projection guidance (GO:0097485)	235	47	23.76	+	1.98	6.45E-05	3.10E-03
axon guidance (GO:0007411)	234	47	23.66	+	1.99	6.20E-05	3.00E-03
cell-substrate adhesion (GO:0031589)	189	46	19.11	+	2.41	1.00E-06	7.46E-05
positive regulation of growth (GO:0045927)	259	45	26.19	+	1.72	1.30E-03	3.63E-02
protein autophosphorylation (GO:0046777)	188	43	19.01	+	2.26	8.80E-06	5.36E-04
limb development (GO:0060173)	180	43	18.20	+	2.36	3.23E-06	2.23E-04
appendage development (GO:0048736)	180	43	18.20	+	2.36	3.23E-06	2.22E-04
homophilic cell adhesion via plasma membrane adhesion molecules (GO:0007156)	168	43	16.99	+	2.53	5.20E-07	4.16E-05
regulation of epithelial cell migration (GO:0010632)	228	42	23.06	+	1.82	6.45E-04	2.04E-02
endosomal transport (GO:0016197)	223	42	22.55	+	1.86	5.34E-04	1.75E-02
epithelial cell development (GO:0002064)	182	42	18.40	+	2.28	7.10E-06	4.47E-04
bone development (GO:0060348)	214	41	21.64	+	1.89	4.16E-04	1.43E-02
regulation of DNA repair (GO:0006282)	210	41	21.24	+	1.93	2.57E-04	9.51E-03
establishment or maintenance of cell polarity (GO:0007163)	201	41	20.33	+	2.02	1.17E-04	5.13E-03
double-strand break repair (GO:0006302)	201	41	20.33	+	2.02	1.17E-04	5.11E-03
cytoskeleton-dependent intracellular transport (GO:0030705)	200	41	20.22	+	2.03	1.11E-04	4.90E-03
cytosolic transport (GO:0016482)	151	41	15.27	+	2.69	2.52E-07	2.11E-05
respiratory system development (GO:0060541)	199	40	20.12	+	1.99	1.77E-04	7.07E-03
negative regulation of cellular macromolecule biosynthetic process (GO:2000113)	193	40	19.52	+	2.05	1.32E-04	5.56E-03
protein acylation (GO:0043543)	188	40	19.01	+	2.10	6.81E-05	3.24E-03
negative regulation of cellular amide metabolic process (GO:0034249)	189	39	19.11	+	2.04	1.80E-04	7.14E-03
neural tube development (GO:0021915)	160	39	16.18	+	2.41	5.42E-06	3.54E-04
positive regulation of intracellular transport (GO:0032388)	206	38	20.83	+	1.82	1.14E-03	3.28E-02
response to insulin (GO:0032868)	205	38	20.73	+	1.83	1.10E-03	3.20E-02
regulation of protein polymerization (GO:0032271)	201	38	20.33	+	1.87	9.52E-04	2.86E-02
regulation of histone modification (GO:0031056)	191	38	19.31	+	1.97	3.17E-04	1.13E-02
regulation of cell cycle G1/S phase transition (GO:1902806)	191	38	19.31	+	1.97	3.17E-04	1.12E-02
RNA localization (GO:0006403)	188	38	19.01	+	2.00	2.73E-04	9.98E-03
establishment of RNA localization (GO:0051236)	171	38	17.29	+	2.20	5.12E-05	2.51E-03
cardiac chamber development (GO:0003205)	168	38	16.99	+	2.24	2.86E-05	1.51E-03
microtubule-based transport (GO:0099111)	203	37	20.53	+	1.80	1.57E-03	4.25E-02
respiratory tube development (GO:0030323)	179	37	18.10	+	2.04	2.00E-04	7.83E-03
lung development (GO:0030324)	175	37	17.70	+	2.09	1.65E-04	6.68E-03
negative regulation of translation (GO:0017148)	167	37	16.89	+	2.19	7.06E-05	3.33E-03
regulation of axonogenesis (GO:0050770)	156	37	15.78	+	2.35	1.46E-05	8.33E-04
limb morphogenesis (GO:0035108)	145	37	14.66	+	2.52	3.61E-06	2.46E-04
appendage morphogenesis (GO:0035107)	145	37	14.66	+	2.52	3.61E-06	2.45E-04
positive regulation of cytoskeleton organization (GO:0051495)	196	36	19.82	+	1.82	1.84E-03	4.81E-02
ameboidal-type cell migration (GO:0001667)	188	36	19.01	+	1.89	9.84E-04	2.93E-02
protein localization to nucleus (GO:0034504)	179	36	18.10	+	1.99	4.80E-04	1.61E-02
pallium development (GO:0021543)	172	36	17.39	+	2.07	2.34E-04	8.82E-03
RNA transport (GO:0050658)	169	36	17.09	+	2.11	1.37E-04	5.73E-03
nucleic acid transport (GO:0050657)	169	36	17.09	+	2.11	1.37E-04	5.72E-03
regulation of microtubule cytoskeleton organization (GO:0070507)	157	36	15.88	+	2.27	4.26E-05	2.13E-03
regulation of cell shape (GO:0008360)	153	36	15.47	+	2.33	2.19E-05	1.21E-03
cell-cell junction organization (GO:0045216)	176	35	17.80	+	1.97	6.71E-04	2.11E-02
negative regulation of supramolecular fiber organization (GO:1902904)	162	35	16.38	+	2.14	1.54E-04	6.34E-03
protein acetylation (GO:0006473)	148	35	14.97	+	2.34	2.71E-05	1.44E-03
regulation of cell-matrix adhesion (GO:0001952)	122	35	12.34	+	2.84	8.76E-07	6.69E-05
regulation of G1/S transition of mitotic cell cycle (GO:2000045)	164	34	16.58	+	2.05	4.36E-04	1.49E-02
negative regulation of cytoskeleton organization (GO:0051494)	158	34	15.98	+	2.13	2.11E-04	8.16E-03
tube formation (GO:0035148)	150	34	15.17	+	2.24	8.59E-05	3.97E-03
positive regulation of developmental growth (GO:0048639)	164	33	16.58	+	1.99	7.00E-04	2.17E-02
positive regulation of Wnt signaling pathway (GO:0030177)	157	33	15.88	+	2.08	3.39E-04	1.20E-02
peptidyl-lysine acetylation (GO:0018394)	129	33	13.04	+	2.53	1.29E-05	7.46E-04
internal protein amino acid acetylation (GO:0006475)	128	33	12.94	+	2.55	1.18E-05	6.92E-04
internal peptidyl-lysine acetylation (GO:0018393)	126	33	12.74	+	2.59	1.03E-05	6.18E-04
positive regulation of cell growth (GO:0030307)	168	32	16.99	+	1.88	1.89E-03	4.93E-02
spindle organization (GO:0007051)	157	32	15.88	+	2.02	8.38E-04	2.56E-02
morphogenesis of embryonic epithelium (GO:0016331)	149	32	15.07	+	2.12	3.81E-04	1.32E-02
protein methylation (GO:0006479)	147	32	14.86	+	2.15	2.26E-04	8.60E-03
protein alkylation (GO:0008213)	147	32	14.86	+	2.15	2.26E-04	8.58E-03
signal transduction in response to DNA damage (GO:0042770)	136	32	13.75	+	2.33	6.95E-05	3.29E-03
regulation of protein-containing complex disassembly (GO:0043244)	129	32	13.04	+	2.45	2.60E-05	1.40E-03
histone acetylation (GO:0016573)	120	32	12.13	+	2.64	7.11E-06	4.45E-04
histone methylation (GO:0016571)	105	32	10.62	+	3.01	6.19E-07	4.88E-05
peptidyl-tyrosine modification (GO:0018212)	156	31	15.78	+	1.97	1.27E-03	3.58E-02
peptidyl-tyrosine phosphorylation (GO:0018108)	153	31	15.47	+	2.00	1.14E-03	3.28E-02
positive regulation of epithelial cell migration (GO:0010634)	149	31	15.07	+	2.06	6.24E-04	1.99E-02
cellular response to insulin stimulus (GO:0032869)	147	31	14.86	+	2.09	5.66E-04	1.83E-02
negative regulation of transmembrane receptor protein serine/threonine kinase signaling pathway (GO:0090101)	147	31	14.86	+	2.09	5.66E-04	1.83E-02
regulation of cellular response to transforming growth factor beta stimulus (GO:1903844)	142	31	14.36	+	2.16	2.86E-04	1.03E-02
regulation of transforming growth factor beta receptor signaling pathway (GO:0017015)	139	31	14.06	+	2.21	2.38E-04	8.96E-03
epithelial tube formation (GO:0072175)	135	31	13.65	+	2.27	1.22E-04	5.25E-03
negative regulation of DNA metabolic process (GO:0051053)	147	30	14.86	+	2.02	9.47E-04	2.85E-02
mRNA transport (GO:0051028)	139	30	14.06	+	2.13	4.17E-04	1.43E-02
cell-matrix adhesion (GO:0007160)	133	30	13.45	+	2.23	1.98E-04	7.79E-03
nuclear export (GO:0051168)	130	30	13.15	+	2.28	1.53E-04	6.32E-03
embryonic epithelial tube formation (GO:0001838)	127	30	12.84	+	2.34	1.24E-04	5.30E-03
establishment of cell polarity (GO:0030010)	124	30	12.54	+	2.39	6.61E-05	3.16E-03
cardiac septum development (GO:0003279)	106	30	10.72	+	2.80	6.76E-06	4.29E-04
artery development (GO:0060840)	96	30	9.71	+	3.09	8.93E-07	6.79E-05
peptidyl-lysine methylation (GO:0018022)	94	30	9.51	+	3.16	6.20E-07	4.86E-05
histone lysine methylation (GO:0034968)	78	30	7.89	+	3.80	2.25E-08	2.26E-06
regulation of double-strand break repair (GO:2000779)	134	29	13.55	+	2.14	5.33E-04	1.75E-02
cardiac ventricle development (GO:0003231)	126	29	12.74	+	2.28	2.10E-04	8.16E-03
embryonic limb morphogenesis (GO:0030326)	122	29	12.34	+	2.35	1.65E-04	6.71E-03
embryonic appendage morphogenesis (GO:0035113)	122	29	12.34	+	2.35	1.65E-04	6.69E-03
neural tube formation (GO:0001841)	107	29	10.82	+	2.68	1.57E-05	8.90E-04
microtubule organizing center organization (GO:0031023)	104	29	10.52	+	2.76	1.13E-05	6.71E-04
positive regulation of autophagy (GO:0010508)	140	28	14.16	+	1.98	1.82E-03	4.78E-02
cerebral cortex development (GO:0021987)	116	28	11.73	+	2.39	1.22E-04	5.25E-03
regulation of gene expression, epigenetic (GO:0040029)	115	28	11.63	+	2.41	1.11E-04	4.91E-03
positive regulation of mRNA metabolic process (GO:1903313)	122	27	12.34	+	2.19	5.39E-04	1.76E-02
primary neural tube formation (GO:0014020)	99	27	10.01	+	2.70	2.96E-05	1.55E-03
mRNA catabolic process (GO:0006402)	127	26	12.84	+	2.02	1.85E-03	4.84E-02
hepaticobiliary system development (GO:0061008)	126	26	12.74	+	2.04	1.73E-03	4.60E-02
mammary gland development (GO:0030879)	125	26	12.64	+	2.06	1.62E-03	4.35E-02
developmental growth involved in morphogenesis (GO:0060560)	120	26	12.13	+	2.14	1.26E-03	3.56E-02
maintenance of cell number (GO:0098727)	113	26	11.43	+	2.28	5.23E-04	1.73E-02
import into nucleus (GO:0051170)	112	26	11.33	+	2.30	4.98E-04	1.67E-02
stem cell population maintenance (GO:0019827)	111	26	11.22	+	2.32	3.07E-04	1.09E-02
actomyosin structure organization (GO:0031032)	110	26	11.12	+	2.34	2.77E-04	1.01E-02
protein import into nucleus (GO:0006606)	108	26	10.92	+	2.38	2.29E-04	8.66E-03
DNA conformation change (GO:0071103)	104	26	10.52	+	2.47	1.66E-04	6.69E-03
regulation of actin filament bundle assembly (GO:0032231)	104	26	10.52	+	2.47	1.66E-04	6.67E-03
tube closure (GO:0060606)	94	26	9.51	+	2.74	3.72E-05	1.89E-03
neural tube closure (GO:0001843)	93	26	9.40	+	2.76	3.42E-05	1.76E-03
multicellular organism growth (GO:0035264)	85	26	8.60	+	3.02	6.42E-06	4.09E-04
positive regulation of axonogenesis (GO:0050772)	79	26	7.99	+	3.25	2.13E-06	1.51E-04
activation of GTPase activity (GO:0090630)	114	25	11.53	+	2.17	9.99E-04	2.97E-02
dendrite development (GO:0016358)	111	25	11.22	+	2.23	8.12E-04	2.49E-02
synapse assembly (GO:0007416)	103	25	10.42	+	2.40	2.89E-04	1.04E-02
nuclear-transcribed mRNA catabolic process (GO:0000956)	103	25	10.42	+	2.40	2.89E-04	1.04E-02
regulation of actomyosin structure organization (GO:0110020)	99	25	10.01	+	2.50	2.22E-04	8.47E-03
positive regulation of mRNA catabolic process (GO:0061014)	89	25	9.00	+	2.78	4.85E-05	2.40E-03
positive regulation of protein localization to membrane (GO:1905477)	111	24	11.22	+	2.14	1.47E-03	4.02E-02
regulation of nucleocytoplasmic transport (GO:0046822)	108	24	10.92	+	2.20	1.19E-03	3.38E-02
roof of mouth development (GO:0060021)	92	24	9.30	+	2.58	1.34E-04	5.65E-03
regulation of protein depolymerization (GO:1901879)	92	24	9.30	+	2.58	1.34E-04	5.63E-03
regulation of stress fiber assembly (GO:0051492)	91	24	9.20	+	2.61	1.20E-04	5.19E-03
post-embryonic development (GO:0009791)	89	24	9.00	+	2.67	9.66E-05	4.35E-03
regulation of microtubule polymerization or depolymerization (GO:0031110)	88	24	8.90	+	2.70	8.76E-05	4.02E-03
regulation of cell-substrate junction organization (GO:0150116)	69	24	6.98	+	3.44	2.37E-06	1.67E-04
gland morphogenesis (GO:0022612)	105	23	10.62	+	2.17	1.75E-03	4.64E-02
integrin-mediated signaling pathway (GO:0007229)	99	23	10.01	+	2.30	7.76E-04	2.39E-02
retrograde transport, endosome to Golgi (GO:0042147)	91	23	9.20	+	2.50	2.62E-04	9.64E-03
centrosome cycle (GO:0007098)	88	23	8.90	+	2.58	1.84E-04	7.26E-03
regulation of histone methylation (GO:0031060)	83	23	8.39	+	2.74	1.13E-04	4.96E-03
regulation of axon extension (GO:0030516)	96	22	9.71	+	2.27	1.16E-03	3.33E-02
DNA geometric change (GO:0032392)	95	22	9.61	+	2.29	1.06E-03	3.12E-02
negative regulation of transforming growth factor beta receptor signaling pathway (GO:0030512)	94	22	9.51	+	2.31	9.77E-04	2.92E-02
cellular response to alcohol (GO:0097306)	93	22	9.40	+	2.34	9.02E-04	2.73E-02
postsynapse organization (GO:0099173)	92	22	9.30	+	2.36	8.37E-04	2.56E-02
DNA duplex unwinding (GO:0032508)	89	22	9.00	+	2.44	7.01E-04	2.17E-02
peptidyl-threonine modification (GO:0018210)	84	22	8.49	+	2.59	2.53E-04	9.39E-03
peptidyl-threonine phosphorylation (GO:0018107)	75	22	7.58	+	2.90	5.44E-05	2.66E-03
regulation of focal adhesion assembly (GO:0051893)	64	22	6.47	+	3.40	7.19E-06	4.47E-04
regulation of cell-substrate junction assembly (GO:0090109)	64	22	6.47	+	3.40	7.19E-06	4.46E-04
regulation of epithelial to mesenchymal transition (GO:0010717)	94	21	9.51	+	2.21	1.91E-03	4.96E-02
cell growth (GO:0016049)	92	21	9.30	+	2.26	1.59E-03	4.30E-02
developmental cell growth (GO:0048588)	90	21	9.10	+	2.31	1.35E-03	3.77E-02
gene silencing by RNA (GO:0031047)	88	21	8.90	+	2.36	1.17E-03	3.33E-02
vascular transport (GO:0010232)	86	21	8.70	+	2.41	1.04E-03	3.08E-02
transport across blood-brain barrier (GO:0150104)	86	21	8.70	+	2.41	1.04E-03	3.07E-02
RNA export from nucleus (GO:0006405)	84	21	8.49	+	2.47	5.45E-04	1.77E-02
negative regulation of protein-containing complex disassembly (GO:0043242)	80	21	8.09	+	2.60	3.49E-04	1.22E-02
RNA destabilization (GO:0050779)	78	21	7.89	+	2.66	2.88E-04	1.04E-02
mRNA destabilization (GO:0061157)	74	21	7.48	+	2.81	1.18E-04	5.12E-03
ventricular septum development (GO:0003281)	72	21	7.28	+	2.88	8.53E-05	3.95E-03
cellular component maintenance (GO:0043954)	60	20	6.07	+	3.30	2.66E-05	1.43E-03
cytoplasmic microtubule organization (GO:0031122)	58	20	5.87	+	3.41	1.78E-05	1.00E-03
negative regulation of protein depolymerization (GO:1901880)	70	19	7.08	+	2.68	5.77E-04	1.85E-02
phosphatidylinositol phosphate biosynthetic process (GO:0046854)	68	19	6.88	+	2.76	2.88E-04	1.04E-02
artery morphogenesis (GO:0048844)	67	19	6.78	+	2.80	2.46E-04	9.16E-03
negative regulation of neuron differentiation (GO:0045665)	73	18	7.38	+	2.44	1.56E-03	4.23E-02
positive regulation of small GTPase mediated signal transduction (GO:0051057)	73	18	7.38	+	2.44	1.56E-03	4.22E-02
vesicle cytoskeletal trafficking (GO:0099518)	65	18	6.57	+	2.74	4.51E-04	1.53E-02
substrate adhesion-dependent cell spreading (GO:0034446)	56	18	5.66	+	3.18	9.73E-05	4.37E-03
histone H3-K4 methylation (GO:0051568)	46	18	4.65	+	3.87	1.17E-05	6.88E-04
ERBB signaling pathway (GO:0038127)	59	17	5.97	+	2.85	4.39E-04	1.49E-02
heterochromatin organization (GO:0070828)	58	17	5.87	+	2.90	3.72E-04	1.29E-02
aorta development (GO:0035904)	56	17	5.66	+	3.00	2.65E-04	9.73E-03
regulation of microtubule polymerization (GO:0031113)	56	17	5.66	+	3.00	2.65E-04	9.71E-03
epidermal growth factor receptor signaling pathway (GO:0007173)	48	16	4.85	+	3.30	1.66E-04	6.69E-03
post-transcriptional gene silencing (GO:0016441)	44	16	4.45	+	3.60	7.22E-05	3.40E-03
regulation of extracellular matrix organization (GO:1903053)	55	15	5.56	+	2.70	1.49E-03	4.06E-02
heart valve morphogenesis (GO:0003179)	55	15	5.56	+	2.70	1.49E-03	4.05E-02
DNA-templated DNA replication maintenance of fidelity (GO:0045005)	53	15	5.36	+	2.80	1.09E-03	3.19E-02
cell junction maintenance (GO:0034331)	44	15	4.45	+	3.37	2.15E-04	8.30E-03
cell-substrate junction organization (GO:0150115)	37	15	3.74	+	4.01	4.47E-05	2.23E-03
cell-substrate junction assembly (GO:0007044)	36	15	3.64	+	4.12	3.47E-05	1.77E-03
response to epidermal growth factor (GO:0070849)	47	14	4.75	+	2.95	1.05E-03	3.08E-02
exocrine system development (GO:0035272)	43	14	4.35	+	3.22	5.06E-04	1.69E-02
negative regulation of microtubule polymerization or depolymerization (GO:0031111)	42	14	4.25	+	3.30	4.17E-04	1.43E-02
semaphorin-plexin signaling pathway (GO:0071526)	41	14	4.15	+	3.38	3.41E-04	1.20E-02
peptidyl-lysine trimethylation (GO:0018023)	41	14	4.15	+	3.38	3.41E-04	1.20E-02
neuromuscular junction development (GO:0007528)	40	14	4.04	+	3.46	2.77E-04	1.01E-02
protein demethylation (GO:0006482)	35	14	3.54	+	3.96	8.94E-05	4.10E-03
protein dealkylation (GO:0008214)	35	14	3.54	+	3.96	8.94E-05	4.08E-03
histone demethylation (GO:0016577)	33	14	3.34	+	4.20	5.39E-05	2.64E-03
regulation of chromatin organization (GO:1902275)	44	13	4.45	+	2.92	1.66E-03	4.44E-02
histone deubiquitination (GO:0016578)	44	13	4.45	+	2.92	1.66E-03	4.43E-02
regulation of neuron migration (GO:2001222)	43	13	4.35	+	2.99	1.40E-03	3.87E-02
cellular response to epidermal growth factor stimulus (GO:0071364)	43	13	4.35	+	2.99	1.40E-03	3.86E-02
centrosome duplication (GO:0051298)	35	13	3.54	+	3.67	2.85E-04	1.04E-02
post-transcriptional gene silencing by RNA (GO:0035194)	35	13	3.54	+	3.67	2.85E-04	1.03E-02
regulation of microtubule depolymerization (GO:0031114)	33	13	3.34	+	3.90	1.79E-04	7.12E-03
histone lysine demethylation (GO:0070076)	29	13	2.93	+	4.43	6.36E-05	3.06E-03
positive regulation of axon extension (GO:0045773)	39	12	3.94	+	3.04	1.86E-03	4.86E-02
cardiac atrium development (GO:0003230)	37	12	3.74	+	3.21	1.28E-03	3.61E-02
negative regulation of microtubule depolymerization (GO:0007026)	29	12	2.93	+	4.09	2.19E-04	8.42E-03
microtubule anchoring (GO:0034453)	26	12	2.63	+	4.56	9.74E-05	4.36E-03
platelet-derived growth factor receptor signaling pathway (GO:0048008)	33	11	3.34	+	3.30	1.69E-03	4.50E-02
Schwann cell development (GO:0014044)	32	11	3.24	+	3.40	1.38E-03	3.84E-02
salivary gland development (GO:0007431)	31	11	3.13	+	3.51	1.12E-03	3.24E-02
centriole assembly (GO:0098534)	29	11	2.93	+	3.75	7.17E-04	2.22E-02
nucleus localization (GO:0051647)	26	11	2.63	+	4.18	3.43E-04	1.20E-02
histone H3-K4 trimethylation (GO:0080182)	22	11	2.22	+	4.94	1.10E-04	4.86E-03
regulation of heterochromatin organization (GO:0120261)	28	10	2.83	+	3.53	1.79E-03	4.73E-02
regulation of heterochromatin assembly (GO:0031445)	28	10	2.83	+	3.53	1.79E-03	4.72E-02
vesicle-mediated transport between endosomal compartments (GO:0098927)	27	10	2.73	+	3.66	1.44E-03	3.96E-02
centriole replication (GO:0007099)	23	10	2.33	+	4.30	5.36E-04	1.76E-02
neuronal stem cell population maintenance (GO:0097150)	23	10	2.33	+	4.30	5.36E-04	1.75E-02
cell proliferation in forebrain (GO:0021846)	23	10	2.33	+	4.30	5.36E-04	1.75E-02
phosphatidylinositol-3-phosphate biosynthetic process (GO:0036092)	21	10	2.12	+	4.71	3.04E-04	1.09E-02
insulin-like growth factor receptor signaling pathway (GO:0048009)	14	10	1.42	+	7.06	2.45E-05	1.33E-03
miRNA-mediated gene silencing (GO:0035195)	23	9	2.33	+	3.87	1.82E-03	4.78E-02
actin filament-based transport (GO:0099515)	21	9	2.12	+	4.24	1.10E-03	3.19E-02
nuclear migration (GO:0007097)	20	9	2.02	+	4.45	8.35E-04	2.56E-02
NLS-bearing protein import into nucleus (GO:0006607)	19	9	1.92	+	4.68	6.26E-04	1.99E-02
semaphorin-plexin signaling pathway involved in neuron projection guidance (GO:1902285)	16	9	1.62	+	5.56	2.39E-04	8.95E-03
semaphorin-plexin signaling pathway involved in axon guidance (GO:1902287)	15	9	1.52	+	5.93	1.66E-04	6.66E-03
histone H3-K9 methylation (GO:0051567)	16	8	1.62	+	4.94	9.57E-04	2.86E-02
regulation of nuclear-transcribed mRNA poly(A) tail shortening (GO:0060211)	15	8	1.52	+	5.27	6.94E-04	2.17E-02
glomerular epithelial cell development (GO:0072310)	12	7	1.21	+	5.77	1.02E-03	3.01E-02
podocyte development (GO:0072015)	11	7	1.11	+	6.29	6.98E-04	2.17E-02
histone H3-K4 monomethylation (GO:0097692)	9	6	.91	+	6.59	1.44E-03	3.95E-02

## Sheet: EDTA-pellet selected
Overrepresented GOs	REFLIST	INPUT	EXPECTED	(under/over)	FOLD ENRICHMENT
regulation of microtubule cytoskeleton organization (GO:0070507)	157	36	15.88	+	2.27
movement of cell or subcellular component (GO:0006928)	1480	241	149.66	+	1.61
cytoskeleton organization (GO:0007010)	1217	231	123.07	+	1.88
intracellular transport (GO:0046907)	1343	210	135.81	+	1.55
regulation of locomotion (GO:0040012)	1021	172	103.25	+	1.67
regulation of cell motility (GO:2000145)	976	170	98.70	+	1.72
cell motility (GO:0048870)	1032	164	104.36	+	1.57
cell migration (GO:0016477)	873	144	88.28	+	1.63
microtubule-based process (GO:0007017)	794	140	80.29	+	1.74
actin filament-based process (GO:0030029)	610	120	61.68	+	1.95
actin cytoskeleton organization (GO:0030036)	544	111	55.01	+	2.02
regulation of cytoskeleton organization (GO:0051493)	535	103	54.10	+	1.90
microtubule cytoskeleton organization (GO:0000226)	532	102	53.80	+	1.90
supramolecular fiber organization (GO:0097435)	573	96	57.94	+	1.66
positive regulation of cell motility (GO:2000147)	550	92	55.62	+	1.65
positive regulation of cell migration (GO:0030335)	526	91	53.19	+	1.71
regulation of actin filament-based process (GO:0032970)	399	73	40.35	+	1.81
regulation of actin cytoskeleton organization (GO:0032956)	358	63	36.20	+	1.74
microtubule-based movement (GO:0007018)	379	61	38.33	+	1.59
establishment of organelle localization (GO:0051656)	374	60	37.82	+	1.59
negative regulation of locomotion (GO:0040013)	336	56	33.98	+	1.65
negative regulation of cell motility (GO:2000146)	301	52	30.44	+	1.71
negative regulation of cell migration (GO:0030336)	286	52	28.92	+	1.80
regulation of actin filament organization (GO:0110053)	275	52	27.81	+	1.87
Golgi vesicle transport (GO:0048193)	293	51	29.63	+	1.72
regulation of microtubule-based process (GO:0032886)	259	50	26.19	+	1.91
endosomal transport (GO:0016197)	223	42	22.55	+	1.86
cytoskeleton-dependent intracellular transport (GO:0030705)	200	41	20.22	+	2.03
cytosolic transport (GO:0016482)	151	41	15.27	+	2.69
positive regulation of intracellular transport (GO:0032388)	206	38	20.83	+	1.82
microtubule-based transport (GO:0099111)	203	37	20.53	+	1.80
positive regulation of cytoskeleton organization (GO:0051495)	196	36	19.82	+	1.82
ameboidal-type cell migration (GO:0001667)	188	36	19.01	+	1.89
regulation of cell shape (GO:0008360)	153	36	15.47	+	2.33
negative regulation of cytoskeleton organization (GO:0051494)	158	34	15.98	+	2.13
spindle organization (GO:0007051)	157	32	15.88	+	2.02
microtubule organizing center organization (GO:0031023)	104	29	10.52	+	2.76
actomyosin structure organization (GO:0031032)	110	26	11.12	+	2.34
regulation of actin filament bundle assembly (GO:0032231)	104	26	10.52	+	2.47
regulation of actomyosin structure organization (GO:0110020)	99	25	10.01	+	2.50
regulation of microtubule polymerization or depolymerization (GO:0031110)	88	24	8.90	+	2.70
vascular transport (GO:0010232)	86	21	8.70	+	2.41
cytoplasmic microtubule organization (GO:0031122)	58	20	5.87	+	3.41
vesicle cytoskeletal trafficking (GO:0099518)	65	18	6.57	+	2.74
regulation of microtubule polymerization (GO:0031113)	56	17	5.66	+	3.00
negative regulation of microtubule polymerization or depolymerization (GO:0031111)	42	14	4.25	+	3.30
regulation of microtubule depolymerization (GO:0031114)	33	13	3.34	+	3.90
negative regulation of microtubule depolymerization (GO:0007026)	29	12	2.93	+	4.09
microtubule anchoring (GO:0034453)	26	12	2.63	+	4.56
actin filament-based transport (GO:0099515)	21	9	2.12	+	4.24
insulin-like growth factor receptor signaling pathway (GO:0048009)	14	10	1.42	+	7.06
cellular response to endogenous stimulus (GO:0071495)	1078	170	109.01	+	1.56
regulation of cellular response to stress (GO:0080135)	709	111	71.70	+	1.55
response to growth factor (GO:0070848)	487	79	49.25	+	1.60
cellular response to hormone stimulus (GO:0032870)	485	76	49.04	+	1.55
response to peptide (GO:1901652)	434	73	43.89	+	1.66
cellular response to growth factor stimulus (GO:0071363)	457	71	46.21	+	1.54
response to peptide hormone (GO:0043434)	353	57	35.70	+	1.60
regulation of cellular response to growth factor stimulus (GO:0090287)	311	56	31.45	+	1.78
cellular response to peptide (GO:1901653)	299	54	30.24	+	1.79
response to insulin (GO:0032868)	205	38	20.73	+	1.83
cellular response to insulin stimulus (GO:0032869)	147	31	14.86	+	2.09
regulation of cellular response to transforming growth factor beta stimulus (GO:1903844)	142	31	14.36	+	2.16
cellular response to alcohol (GO:0097306)	93	22	9.40	+	2.34
epidermal growth factor receptor signaling pathway (GO:0007173)	48	16	4.85	+	3.30
response to epidermal growth factor (GO:0070849)	47	14	4.75	+	2.95
cellular response to epidermal growth factor stimulus (GO:0071364)	43	13	4.35	+	2.99
cellular response to DNA damage stimulus (GO:0006974)	734	131	74.22	+	1.76
DNA repair (GO:0006281)	490	86	49.55	+	1.74
regulation of response to DNA damage stimulus (GO:2001020)	310	59	31.35	+	1.88
regulation of DNA repair (GO:0006282)	210	41	21.24	+	1.93
double-strand break repair (GO:0006302)	201	41	20.33	+	2.02
signal transduction in response to DNA damage (GO:0042770)	136	32	13.75	+	2.33
regulation of double-strand break repair (GO:2000779)	134	29	13.55	+	2.14
DNA conformation change (GO:0071103)	104	26	10.52	+	2.47
DNA conformation change (GO:0071103)	104	26	10.52	+	2.47
DNA geometric change (GO:0032392)	95	22	9.61	+	2.29
DNA duplex unwinding (GO:0032508)	89	22	9.00	+	2.44
DNA-templated DNA replication maintenance of fidelity (GO:0045005)	53	15	5.36	+	2.80
regulation of protein-containing complex assembly (GO:0043254)	410	65	41.46	+	1.57
plasma membrane bounded cell projection assembly (GO:0120031)	405	64	40.95	+	1.56
cell junction assembly (GO:0034329)	266	62	26.90	+	2.30
regulation of cell junction assembly (GO:1901888)	199	48	20.12	+	2.39
regulation of protein-containing complex disassembly (GO:0043244)	129	32	13.04	+	2.45
synapse assembly (GO:0007416)	103	25	10.42	+	2.40
regulation of stress fiber assembly (GO:0051492)	91	24	9.20	+	2.61
regulation of focal adhesion assembly (GO:0051893)	64	22	6.47	+	3.40
regulation of cell-substrate junction assembly (GO:0090109)	64	22	6.47	+	3.40
negative regulation of protein-containing complex disassembly (GO:0043242)	80	21	8.09	+	2.60
centriole assembly (GO:0098534)	29	11	2.93	+	3.75
positive regulation of autophagy (GO:0010508)	140	28	14.16	+	1.98
regulation of autophagy (GO:0010506)	340	57	34.38	+	1.66

## Sheet: Pellet_all_GOs
GO biological process complete	Homo sapiens - REFLIST (20589)	polysome_table.txt (1439)	polysome_table.txt (expected)	polysome_table.txt (over/under)	polysome_table.txt (fold Enrichment)	polysome_table.txt (raw P-value)	polysome_table.txt (FDR)
biological_process (GO:0008150)	17859	1297	1248.20	+	1.04	1.62E-04	1.41E-02
cellular process (GO:0009987)	15176	1153	1060.68	+	1.09	4.04E-08	6.34E-06
biological regulation (GO:0065007)	12469	764	871.48	-	.88	2.90E-08	4.59E-06
metabolic process (GO:0008152)	8019	727	560.46	+	1.30	9.11E-18	3.40E-15
regulation of biological process (GO:0050789)	11735	704	820.18	-	.86	3.17E-09	5.71E-07
cellular metabolic process (GO:0044237)	7138	678	498.89	+	1.36	7.79E-21	4.21E-18
organic substance metabolic process (GO:0071704)	7577	669	529.57	+	1.26	3.94E-13	9.50E-11
regulation of cellular process (GO:0050794)	11275	663	788.03	-	.84	2.00E-10	3.97E-08
primary metabolic process (GO:0044238)	7091	633	495.60	+	1.28	5.19E-13	1.21E-10
nitrogen compound metabolic process (GO:0006807)	6583	605	460.10	+	1.31	1.08E-14	2.92E-12
macromolecule metabolic process (GO:0043170)	5847	495	408.66	+	1.21	1.90E-06	2.40E-04
cellular component organization or biogenesis (GO:0071840)	5659	487	395.52	+	1.23	3.17E-07	4.36E-05
response to stimulus (GO:0050896)	8096	472	565.84	-	.83	8.31E-07	1.11E-04
organonitrogen compound metabolic process (GO:1901564)	5000	464	349.46	+	1.33	4.61E-11	9.37E-09
cellular component organization (GO:0016043)	5459	450	381.54	+	1.18	1.04E-04	9.68E-03
cellular nitrogen compound metabolic process (GO:0034641)	3354	437	234.42	+	1.86	4.71E-37	1.05E-33
cellular macromolecule metabolic process (GO:0044260)	4236	385	296.06	+	1.30	6.55E-08	1.01E-05
cellular response to stimulus (GO:0051716)	6479	356	452.83	-	.79	6.58E-08	1.00E-05
multicellular organismal process (GO:0032501)	6472	347	452.34	-	.77	3.44E-09	6.05E-07
protein metabolic process (GO:0019538)	3953	331	276.28	+	1.20	5.65E-04	4.28E-02
organic cyclic compound metabolic process (GO:1901360)	3076	326	214.99	+	1.52	1.05E-13	2.70E-11
biosynthetic process (GO:0009058)	2390	325	167.04	+	1.95	2.55E-29	3.07E-26
organic substance biosynthetic process (GO:1901576)	2325	319	162.50	+	1.96	2.39E-29	3.13E-26
cellular biosynthetic process (GO:0044249)	2255	316	157.61	+	2.01	1.60E-30	2.78E-27
cellular aromatic compound metabolic process (GO:0006725)	2831	313	197.86	+	1.58	2.30E-15	7.36E-13
organelle organization (GO:0006996)	3424	307	239.31	+	1.28	7.56E-06	8.90E-04
heterocycle metabolic process (GO:0046483)	2778	307	194.16	+	1.58	4.95E-15	1.44E-12
cellular protein metabolic process (GO:0044267)	3349	300	234.07	+	1.28	1.05E-05	1.17E-03
cellular component biogenesis (GO:0044085)	2630	299	183.82	+	1.63	4.32E-16	1.47E-13
nucleobase-containing compound metabolic process (GO:0006139)	2610	294	182.42	+	1.61	2.52E-15	7.90E-13
gene expression (GO:0010467)	2080	293	145.37	+	2.02	2.38E-28	2.66E-25
anatomical structure development (GO:0048856)	5029	289	351.49	-	.82	1.68E-04	1.46E-02
regulation of gene expression (GO:0010468)	4833	275	337.79	-	.81	1.20E-04	1.10E-02
cellular component assembly (GO:0022607)	2398	258	167.60	+	1.54	2.19E-11	4.71E-09
cellular nitrogen compound biosynthetic process (GO:0044271)	1381	257	96.52	+	2.66	6.70E-42	3.50E-38
organonitrogen compound biosynthetic process (GO:1901566)	1331	243	93.03	+	2.61	2.19E-38	6.86E-35
cell communication (GO:0007154)	5266	241	368.05	-	.65	9.57E-15	2.63E-12
signaling (GO:0023052)	5163	230	360.85	-	.64	7.80E-16	2.60E-13
response to chemical (GO:0042221)	4035	229	282.01	-	.81	5.53E-04	4.20E-02
multicellular organism development (GO:0007275)	4129	220	288.58	-	.76	7.04E-06	8.42E-04
regulation of nucleobase-containing compound metabolic process (GO:0019219)	4059	216	283.69	-	.76	8.44E-06	9.66E-04
regulation of response to stimulus (GO:0048583)	4001	216	279.64	-	.77	2.68E-05	2.82E-03
nucleic acid metabolic process (GO:0090304)	2109	216	147.40	+	1.47	5.60E-08	8.68E-06
signal transduction (GO:0007165)	4820	211	336.88	-	.63	1.72E-15	5.61E-13
macromolecule biosynthetic process (GO:0009059)	1291	204	90.23	+	2.26	1.12E-24	1.10E-21
regulation of RNA metabolic process (GO:0051252)	3753	197	262.30	-	.75	8.66E-06	9.83E-04
protein-containing complex organization (GO:0043933)	1410	195	98.55	+	1.98	7.07E-18	2.70E-15
system development (GO:0048731)	3719	192	259.93	-	.74	3.38E-06	4.24E-04
regulation of signaling (GO:0023051)	3355	186	234.49	-	.79	6.31E-04	4.73E-02
regulation of RNA biosynthetic process (GO:2001141)	3465	185	242.17	-	.76	6.28E-05	6.12E-03
protein-containing complex assembly (GO:0065003)	1254	185	87.64	+	2.11	1.57E-19	6.65E-17
regulation of nucleic acid-templated transcription (GO:1903506)	3456	184	241.55	-	.76	5.29E-05	5.25E-03
regulation of transcription, DNA-templated (GO:0006355)	3455	184	241.48	-	.76	5.30E-05	5.22E-03
animal organ development (GO:0048513)	3179	174	222.19	-	.78	5.44E-04	4.16E-02
small molecule metabolic process (GO:0044281)	1616	164	112.94	+	1.45	5.01E-06	6.13E-04
cellular amide metabolic process (GO:0043603)	803	162	56.12	+	2.89	1.44E-29	2.06E-26
cellular macromolecule biosynthetic process (GO:0034645)	764	158	53.40	+	2.96	7.22E-30	1.13E-26
RNA metabolic process (GO:0016070)	1442	149	100.78	+	1.48	6.96E-06	8.39E-04
peptide metabolic process (GO:0006518)	538	145	37.60	+	3.86	5.57E-38	1.46E-34
cellular protein modification process (GO:0006464)	2725	144	190.45	-	.76	3.57E-04	2.94E-02
protein modification process (GO:0036211)	2725	144	190.45	-	.76	3.57E-04	2.93E-02
amide biosynthetic process (GO:0043604)	520	144	36.34	+	3.96	7.85E-39	3.08E-35
Unclassified (UNCLASSIFIED)	2730	142	190.80	-	.74	1.62E-04	1.42E-02
regulation of multicellular organismal process (GO:0051239)	2721	141	190.18	-	.74	1.35E-04	1.21E-02
peptide biosynthetic process (GO:0043043)	404	137	28.24	+	4.85	5.26E-45	4.12E-41
translation (GO:0006412)	377	134	26.35	+	5.09	7.05E-46	1.10E-41
regulation of transcription by RNA polymerase II (GO:0006357)	2619	125	183.05	-	.68	3.57E-06	4.44E-04
organic cyclic compound biosynthetic process (GO:1901362)	1023	121	71.50	+	1.69	1.42E-07	2.09E-05
aromatic compound biosynthetic process (GO:0019438)	895	115	62.55	+	1.84	4.60E-09	8.01E-07
heterocycle biosynthetic process (GO:0018130)	885	115	61.85	+	1.86	2.56E-09	4.72E-07
nucleobase-containing compound biosynthetic process (GO:0034654)	813	110	56.82	+	1.94	8.63E-10	1.63E-07
organophosphate metabolic process (GO:0019637)	889	108	62.13	+	1.74	1.80E-07	2.58E-05
positive regulation of biosynthetic process (GO:0009891)	2062	105	144.12	-	.73	5.87E-04	4.43E-02
carbohydrate derivative metabolic process (GO:1901135)	978	105	68.35	+	1.54	5.00E-05	4.99E-03
positive regulation of cellular biosynthetic process (GO:0031328)	2024	102	141.46	-	.72	5.22E-04	4.03E-02
RNA processing (GO:0006396)	858	102	59.97	+	1.70	1.26E-06	1.65E-04
nervous system development (GO:0007399)	2081	96	145.44	-	.66	1.10E-05	1.22E-03
cell surface receptor signaling pathway (GO:0007166)	2106	91	147.19	-	.62	5.17E-07	7.04E-05
mitochondrion organization (GO:0007005)	438	90	30.61	+	2.94	3.46E-17	1.23E-14
nucleobase-containing small molecule metabolic process (GO:0055086)	541	87	37.81	+	2.30	2.31E-11	4.90E-09
DNA metabolic process (GO:0006259)	794	84	55.49	+	1.51	4.64E-04	3.69E-02
generation of precursor metabolites and energy (GO:0006091)	395	84	27.61	+	3.04	7.13E-17	2.48E-14
ribonucleoprotein complex biogenesis (GO:0022613)	429	82	29.98	+	2.73	3.08E-14	8.18E-12
system process (GO:0003008)	2049	81	143.21	-	.57	1.21E-08	2.02E-06
carbohydrate derivative biosynthetic process (GO:1901137)	599	81	41.87	+	1.93	1.43E-07	2.08E-05
regulation of proteolysis (GO:0030162)	737	80	51.51	+	1.55	2.89E-04	2.40E-02
nucleoside phosphate metabolic process (GO:0006753)	471	80	32.92	+	2.43	1.75E-11	3.86E-09
cell development (GO:0048468)	1668	78	116.58	-	.67	1.81E-04	1.56E-02
nucleotide metabolic process (GO:0009117)	463	78	32.36	+	2.41	4.16E-11	8.57E-09
negative regulation of biosynthetic process (GO:0009890)	1610	74	112.53	-	.66	1.40E-04	1.25E-02
organophosphate biosynthetic process (GO:0090407)	548	74	38.30	+	1.93	5.76E-07	7.78E-05
cytoplasmic translation (GO:0002181)	124	73	8.67	+	8.42	3.17E-36	6.20E-33
negative regulation of cellular biosynthetic process (GO:0031327)	1581	72	110.50	-	.65	1.23E-04	1.11E-02
ATP metabolic process (GO:0046034)	207	70	14.47	+	4.84	2.44E-23	2.01E-20
energy derivation by oxidation of organic compounds (GO:0015980)	253	69	17.68	+	3.90	9.13E-19	3.67E-16
negative regulation of macromolecule biosynthetic process (GO:0010558)	1522	68	106.38	-	.64	9.20E-05	8.69E-03
ncRNA metabolic process (GO:0034660)	524	68	36.62	+	1.86	6.25E-06	7.60E-04
cellular respiration (GO:0045333)	188	68	13.14	+	5.18	4.80E-24	4.42E-21
purine-containing compound metabolic process (GO:0072521)	390	67	27.26	+	2.46	5.76E-10	1.11E-07
negative regulation of nucleobase-containing compound metabolic process (GO:0045934)	1551	65	108.40	-	.60	8.21E-06	9.46E-04
ribose phosphate metabolic process (GO:0019693)	385	64	26.91	+	2.38	3.39E-09	6.04E-07
purine nucleotide metabolic process (GO:0006163)	367	64	25.65	+	2.50	6.67E-10	1.27E-07
ribosome biogenesis (GO:0042254)	296	64	20.69	+	3.09	1.94E-13	4.83E-11
ribonucleotide metabolic process (GO:0009259)	375	62	26.21	+	2.37	7.17E-09	1.23E-06
purine ribonucleotide metabolic process (GO:0009150)	354	62	24.74	+	2.51	1.15E-09	2.15E-07
aerobic respiration (GO:0009060)	158	62	11.04	+	5.61	1.61E-23	1.40E-20
ncRNA processing (GO:0034470)	404	61	28.24	+	2.16	1.91E-07	2.69E-05
nucleoside phosphate biosynthetic process (GO:1901293)	270	60	18.87	+	3.18	4.06E-13	9.64E-11
nucleotide biosynthetic process (GO:0009165)	268	60	18.73	+	3.20	3.09E-13	7.56E-11
oxidative phosphorylation (GO:0006119)	118	59	8.25	+	7.15	1.15E-26	1.20E-23
purine-containing compound biosynthetic process (GO:0072522)	216	57	15.10	+	3.78	3.33E-15	1.00E-12
electron transport chain (GO:0022900)	166	57	11.60	+	4.91	1.70E-19	7.00E-17
negative regulation of RNA metabolic process (GO:0051253)	1427	55	99.74	-	.55	1.49E-06	1.93E-04
purine nucleotide biosynthetic process (GO:0006164)	204	55	14.26	+	3.86	4.76E-15	1.41E-12
ribose phosphate biosynthetic process (GO:0046390)	217	54	15.17	+	3.56	1.35E-13	3.40E-11
ribonucleotide biosynthetic process (GO:0009260)	210	54	14.68	+	3.68	4.36E-14	1.14E-11
purine ribonucleotide biosynthetic process (GO:0009152)	195	54	13.63	+	3.96	3.31E-15	1.02E-12
nucleoside triphosphate metabolic process (GO:0009141)	140	54	9.78	+	5.52	2.22E-20	1.09E-17
nervous system process (GO:0050877)	1440	52	100.64	-	.52	1.23E-07	1.83E-05
negative regulation of RNA biosynthetic process (GO:1902679)	1317	52	92.05	-	.56	7.54E-06	8.96E-04
negative regulation of nucleic acid-templated transcription (GO:1903507)	1315	52	91.91	-	.57	9.51E-06	1.07E-03
negative regulation of transcription, DNA-templated (GO:0045892)	1313	52	91.77	-	.57	9.43E-06	1.06E-03
rRNA metabolic process (GO:0016072)	250	51	17.47	+	2.92	3.27E-10	6.41E-08
nucleoside triphosphate biosynthetic process (GO:0009142)	114	51	7.97	+	6.40	1.49E-21	9.36E-19
purine nucleoside triphosphate metabolic process (GO:0009144)	116	50	8.11	+	6.17	1.32E-20	6.88E-18
respiratory electron transport chain (GO:0022904)	112	50	7.83	+	6.39	4.00E-21	2.24E-18
purine nucleoside triphosphate biosynthetic process (GO:0009145)	97	50	6.78	+	7.38	3.01E-23	2.36E-20
rRNA processing (GO:0006364)	220	49	15.38	+	3.19	5.39E-11	1.08E-08
mitochondrial gene expression (GO:0140053)	139	49	9.71	+	5.04	2.52E-17	9.17E-15
ribonucleoside triphosphate metabolic process (GO:0009199)	118	49	8.25	+	5.94	1.11E-19	5.10E-17
purine ribonucleoside triphosphate metabolic process (GO:0009205)	111	49	7.76	+	6.32	1.44E-20	7.30E-18
ribonucleoside triphosphate biosynthetic process (GO:0009201)	102	49	7.13	+	6.87	8.62E-22	5.63E-19
purine ribonucleoside triphosphate biosynthetic process (GO:0009206)	96	49	6.71	+	7.30	1.15E-22	8.55E-20
mitochondrial translation (GO:0032543)	108	47	7.55	+	6.23	1.38E-19	6.20E-17
generation of neurons (GO:0048699)	1081	46	75.55	-	.61	4.00E-04	3.23E-02
mitochondrial ATP synthesis coupled electron transport (GO:0042775)	90	46	6.29	+	7.31	2.22E-21	1.34E-18
ATP synthesis coupled electron transport (GO:0042773)	90	46	6.29	+	7.31	2.22E-21	1.29E-18
ATP biosynthetic process (GO:0006754)	85	46	5.94	+	7.74	3.73E-22	2.66E-19
mitochondrial respiratory chain complex assembly (GO:0033108)	95	43	6.64	+	6.48	1.56E-18	6.10E-16
aerobic electron transport chain (GO:0019646)	85	43	5.94	+	7.24	6.04E-20	2.87E-17
proton motive force-driven ATP synthesis (GO:0015986)	73	43	5.10	+	8.43	7.22E-22	4.92E-19
negative regulation of transcription by RNA polymerase II (GO:0000122)	969	40	67.73	-	.59	4.11E-04	3.30E-02
protein-DNA complex subunit organization (GO:0071824)	250	39	17.47	+	2.23	1.82E-05	1.97E-03
ribonucleoprotein complex subunit organization (GO:0071826)	196	39	13.70	+	2.85	6.88E-08	1.04E-05
ribonucleoprotein complex assembly (GO:0022618)	188	39	13.14	+	2.97	2.62E-08	4.19E-06
proton motive force-driven mitochondrial ATP synthesis (GO:0042776)	64	38	4.47	+	8.50	1.42E-19	6.19E-17
sensory perception (GO:0007600)	984	37	68.77	-	.54	4.14E-05	4.24E-03
protein-DNA complex assembly (GO:0065004)	212	35	14.82	+	2.36	1.37E-05	1.49E-03
phosphorylation (GO:0016310)	915	32	63.95	-	.50	2.04E-05	2.18E-03
NADH dehydrogenase complex assembly (GO:0010257)	60	31	4.19	+	7.39	5.81E-15	1.66E-12
mitochondrial respiratory chain complex I assembly (GO:0032981)	60	31	4.19	+	7.39	5.81E-15	1.63E-12
G protein-coupled receptor signaling pathway (GO:0007186)	1221	28	85.34	-	.33	1.24E-12	2.86E-10
mitochondrial transport (GO:0006839)	153	27	10.69	+	2.52	4.94E-05	4.96E-03
detoxification (GO:0098754)	136	24	9.51	+	2.52	1.35E-04	1.21E-02
proton transmembrane transport (GO:1902600)	123	24	8.60	+	2.79	2.88E-05	2.99E-03
ribosomal small subunit biogenesis (GO:0042274)	74	24	5.17	+	4.64	1.27E-08	2.10E-06
ribosomal large subunit biogenesis (GO:0042273)	72	24	5.03	+	4.77	8.19E-09	1.38E-06
antigen processing and presentation (GO:0019882)	111	23	7.76	+	2.96	1.84E-05	1.97E-03
mitochondrial electron transport, NADH to ubiquinone (GO:0006120)	45	23	3.15	+	7.31	2.18E-11	4.74E-09
cellular response to toxic substance (GO:0097237)	116	22	8.11	+	2.71	8.78E-05	8.34E-03
mitochondrial membrane organization (GO:0007006)	123	21	8.60	+	2.44	5.00E-04	3.88E-02
cellular detoxification (GO:1990748)	108	21	7.55	+	2.78	9.26E-05	8.69E-03
antigen processing and presentation of peptide antigen (GO:0048002)	76	21	5.31	+	3.95	9.35E-07	1.24E-04
antigen processing and presentation of exogenous antigen (GO:0019884)	66	21	4.61	+	4.55	1.33E-07	1.97E-05
ribosome assembly (GO:0042255)	62	20	4.33	+	4.62	2.19E-07	3.07E-05
protein phosphorylation (GO:0006468)	722	19	50.46	-	.38	1.03E-06	1.35E-04
cellular oxidant detoxification (GO:0098869)	93	19	6.50	+	2.92	1.12E-04	1.03E-02
antigen processing and presentation of exogenous peptide antigen (GO:0002478)	55	19	3.84	+	4.94	1.84E-07	2.62E-05
protein localization to mitochondrion (GO:0070585)	82	17	5.73	+	2.97	2.17E-04	1.84E-02
positive regulation of mitochondrion organization (GO:0010822)	81	17	5.66	+	3.00	1.91E-04	1.64E-02
establishment of protein localization to mitochondrion (GO:0072655)	74	16	5.17	+	3.09	2.18E-04	1.84E-02
anaphase-promoting complex-dependent catabolic process (GO:0031145)	39	16	2.73	+	5.87	2.64E-07	3.66E-05
tumor necrosis factor-mediated signaling pathway (GO:0033209)	72	15	5.03	+	2.98	4.78E-04	3.76E-02
protein targeting to mitochondrion (GO:0006626)	60	15	4.19	+	3.58	8.64E-05	8.26E-03
detection of stimulus (GO:0051606)	685	14	47.88	-	.29	2.31E-08	3.76E-06
SCF-dependent proteasomal ubiquitin-dependent protein catabolic process (GO:0031146)	63	14	4.40	+	3.18	4.17E-04	3.34E-02
protein insertion into membrane (GO:0051205)	62	14	4.33	+	3.23	3.63E-04	2.96E-02
maturation of SSU-rRNA (GO:0030490)	51	14	3.56	+	3.93	6.32E-05	6.11E-03
post-translational protein modification (GO:0043687)	57	13	3.98	+	3.26	5.37E-04	4.12E-02
antigen processing and presentation of peptide antigen via MHC class I (GO:0002474)	44	13	3.08	+	4.23	6.11E-05	5.99E-03
cell redox homeostasis (GO:0045454)	41	13	2.87	+	4.54	3.32E-05	3.43E-03
spliceosomal snRNP assembly (GO:0000387)	38	12	2.66	+	4.52	6.85E-05	6.59E-03
metallo-sulfur cluster assembly (GO:0031163)	29	12	2.03	+	5.92	7.71E-06	9.02E-04
iron-sulfur cluster assembly (GO:0016226)	29	12	2.03	+	5.92	7.71E-06	8.95E-04
maturation of SSU-rRNA from tricistronic rRNA transcript (SSU-rRNA, 5.8S rRNA, LSU-rRNA) (GO:0000462)	38	11	2.66	+	4.14	2.58E-04	2.15E-02
cytochrome complex assembly (GO:0017004)	37	11	2.59	+	4.25	2.13E-04	1.81E-02
interleukin-1-mediated signaling pathway (GO:0070498)	35	11	2.45	+	4.50	1.42E-04	1.25E-02
regulation of cellular amino acid metabolic process (GO:0006521)	28	11	1.96	+	5.62	2.72E-05	2.84E-03
antigen processing and presentation of exogenous peptide antigen via MHC class I (GO:0042590)	25	11	1.75	+	6.30	1.17E-05	1.28E-03
ribosomal small subunit assembly (GO:0000028)	19	11	1.33	+	8.28	1.53E-06	1.96E-04
stimulatory C-type lectin receptor signaling pathway (GO:0002223)	36	10	2.52	+	3.97	6.41E-04	4.78E-02
regulation of hematopoietic stem cell differentiation (GO:1902036)	31	10	2.17	+	4.62	2.38E-04	1.99E-02
regulation of transcription from RNA polymerase II promoter in response to hypoxia (GO:0061418)	28	10	1.96	+	5.11	1.20E-04	1.09E-02
mitochondrial electron transport, cytochrome c to oxygen (GO:0006123)	22	10	1.54	+	6.50	2.34E-05	2.48E-03
antigen processing and presentation of exogenous peptide antigen via MHC class I, TAP-dependent (GO:0002479)	17	10	1.19	+	8.42	4.14E-06	5.11E-04
pre-replicative complex assembly (GO:0036388)	15	10	1.05	+	9.54	1.81E-06	2.31E-04
detection of stimulus involved in sensory perception (GO:0050906)	559	9	39.07	-	.23	2.31E-08	3.73E-06
positive regulation of signal transduction by p53 class mediator (GO:1901798)	28	9	1.96	+	4.60	4.95E-04	3.88E-02
maturation of LSU-rRNA (GO:0000470)	28	9	1.96	+	4.60	4.95E-04	3.86E-02
ribosomal large subunit assembly (GO:0000027)	27	9	1.89	+	4.77	3.97E-04	3.23E-02
RNA capping (GO:0036260)	16	8	1.12	+	7.15	9.30E-05	8.67E-03
mitochondrial electron transport, ubiquinol to cytochrome c (GO:0006122)	14	8	.98	+	8.18	4.55E-05	4.63E-03
protein maturation by iron-sulfur cluster transfer (GO:0097428)	14	8	.98	+	8.18	4.55E-05	4.60E-03
sensory perception of chemical stimulus (GO:0007606)	545	7	38.09	-	.18	2.61E-09	4.75E-07
detection of chemical stimulus (GO:0009593)	526	7	36.76	-	.19	7.41E-09	1.26E-06
7-methylguanosine cap hypermethylation (GO:0036261)	8	6	.56	+	10.73	1.46E-04	1.29E-02
rhythmic process (GO:0048511)	267	5	18.66	-	.27	4.74E-04	3.75E-02
cell-cell adhesion via plasma-membrane adhesion molecules (GO:0098742)	264	5	18.45	-	.27	6.73E-04	5.00E-02
detection of chemical stimulus involved in sensory perception (GO:0050907)	489	3	34.18	-	.09	3.36E-11	7.03E-09
sensory perception of smell (GO:0007608)	470	2	32.85	-	.06	1.10E-11	2.46E-09
detection of chemical stimulus involved in sensory perception of smell (GO:0050911)	443	1	30.96	-	.03	4.21E-12	9.56E-10
Analyzed List:	polysome_table.txt (Homo sapiens)
Analysis Type:	PANTHER Overrepresentation Test (Released 20220712)
Reference List:	Homo sapiens (all genes in database)
Annotation Version and Release Date:	GO Ontology database DOI: 10.5281/zenodo.6399963 Released 2022-03-22
Test Type:	FISHER
Correction:	FDR

## Sheet: Pellet selected
Overrepresented GOs:	REFLIST	INPUT	EXPECTED	(under/over)	FOLD ENRICHMENT
translation (GO:0006412)	377	134	26.35	+	5.09
cytoplasmic translation (GO:0002181)	124	73	8.67	+	8.42
ribosome biogenesis (GO:0042254)	296	64	20.69	+	3.09
mitochondrial translation (GO:0032543)	108	47	7.55	+	6.23
ribosomal small subunit biogenesis (GO:0042274)	74	24	5.17	+	4.64
ribosomal large subunit biogenesis (GO:0042273)	72	24	5.03	+	4.77
ribosome assembly (GO:0042255)	62	20	4.33	+	4.62
ribosomal small subunit assembly (GO:0000028)	19	11	1.33	+	8.28
ribosomal large subunit assembly (GO:0000027)	27	9	1.89	+	4.77
mitochondrion organization (GO:0007005)	438	90	30.61	+	2.94
ATP metabolic process (GO:0046034)	207	70	14.47	+	4.84
energy derivation by oxidation of organic compounds (GO:0015980)	253	69	17.68	+	3.90
cellular respiration (GO:0045333)	188	68	13.14	+	5.18
aerobic respiration (GO:0009060)	158	62	11.04	+	5.61
oxidative phosphorylation (GO:0006119)	118	59	8.25	+	7.15
electron transport chain (GO:0022900)	166	57	11.60	+	4.91
mitochondrial gene expression (GO:0140053)	139	49	9.71	+	5.04
mitochondrial ATP synthesis coupled electron transport (GO:0042775)	90	46	6.29	+	7.31
ATP synthesis coupled electron transport (GO:0042773)	90	46	6.29	+	7.31
ATP biosynthetic process (GO:0006754)	85	46	5.94	+	7.74
mitochondrial respiratory chain complex assembly (GO:0033108)	95	43	6.64	+	6.48
aerobic electron transport chain (GO:0019646)	85	43	5.94	+	7.24
proton motive force-driven ATP synthesis (GO:0015986)	73	43	5.10	+	8.43
NADH dehydrogenase complex assembly (GO:0010257)	60	31	4.19	+	7.39
mitochondrial respiratory chain complex I assembly (GO:0032981)	60	31	4.19	+	7.39
mitochondrial transport (GO:0006839)	153	27	10.69	+	2.52
mitochondrial electron transport, NADH to ubiquinone (GO:0006120)	45	23	3.15	+	7.31
mitochondrial membrane organization (GO:0007006)	123	21	8.60	+	2.44
protein localization to mitochondrion (GO:0070585)	82	17	5.73	+	2.97
positive regulation of mitochondrion organization (GO:0010822)	81	17	5.66	+	3.00
establishment of protein localization to mitochondrion (GO:0072655)	74	16	5.17	+	3.09
protein targeting to mitochondrion (GO:0006626)	60	15	4.19	+	3.58
cytochrome complex assembly (GO:0017004)	37	11	2.59	+	4.25
mitochondrial electron transport, cytochrome c to oxygen (GO:0006123)	22	10	1.54	+	6.50
mitochondrial electron transport, ubiquinol to cytochrome c (GO:0006122)	14	8	.98	+	8.18
Underrepresented GOs:
response to stimulus (GO:0050896)	8096	472	565.84	-	.83
cellular response to stimulus (GO:0051716)	6479	356	452.83	-	.79
signaling (GO:0023052)	5163	230	360.85	-	.64
response to chemical (GO:0042221)	4035	229	282.01	-	.81
regulation of response to stimulus (GO:0048583)	4001	216	279.64	-	.77
regulation of signaling (GO:0023051)	3355	186	234.49	-	.79
detection of stimulus (GO:0051606)	685	14	47.88	-	.29
detection of chemical stimulus (GO:0009593)	526	7	36.76	-	.19
detection of chemical stimulus involved in sensory perception (GO:0050907)	489	3	34.18	-	.09

## Sheet: EDTA-pellet common w. predicted
EDTA-pellet GOs	Color codes of functionally related GOs	Predicted to be in EDTA-pellet
actin filament-based process (GO:0030029)	Translation	actin filament-based process (GO:0030029)
brain development (GO:0007420)	DNA damage response	brain development (GO:0007420)
cell adhesion (GO:0007155)	Cytoskeleton	cell adhesion (GO:0007155)
cell cycle (GO:0007049)	Transport	cell cycle (GO:0007049)
cell cycle process (GO:0022402)	Transcription	cell cycle process (GO:0022402)
cell division (GO:0051301)	Stress Response	cell division (GO:0051301)
cellular response to DNA damage stimulus (GO:0006974)	Decay	cellular response to DNA damage stimulus (GO:0006974)
central nervous system development (GO:0007417)	Assembly	central nervous system development (GO:0007417)
centrosome cycle (GO:0007098)	Mitochondria	centrosome cycle (GO:0007098)
cerebral cortex development (GO:0021987)	Spliceing	cerebral cortex development (GO:0021987)
chordate embryonic development (GO:0043009)	Autophagy	chordate embryonic development (GO:0043009)
chromatin organization (GO:0006325)		chromatin organization (GO:0006325)
chromatin remodeling (GO:0006338)		chromatin remodeling (GO:0006338)
chromosome organization (GO:0051276)		chromosome organization (GO:0051276)
cytoskeleton organization (GO:0007010)		cytoskeleton organization (GO:0007010)
cytoskeleton-dependent intracellular transport (GO:0030705)		cytoskeleton-dependent intracellular transport (GO:0030705)
DNA conformation change (GO:0071103)		DNA conformation change (GO:0071103)
DNA geometric change (GO:0032392)		DNA geometric change (GO:0032392)
DNA repair (GO:0006281)		DNA repair (GO:0006281)
double-strand break repair (GO:0006302)		double-strand break repair (GO:0006302)
embryo development (GO:0009790)		embryo development (GO:0009790)
embryo development ending in birth or egg hatching (GO:0009792)		embryo development ending in birth or egg hatching (GO:0009792)
endosomal transport (GO:0016197)		endosomal transport (GO:0016197)
establishment of localization in cell (GO:0051649)		establishment of localization in cell (GO:0051649)
establishment of organelle localization (GO:0051656)		establishment of organelle localization (GO:0051656)
establishment of RNA localization (GO:0051236)		establishment of RNA localization (GO:0051236)
gene silencing by RNA (GO:0031047)		gene silencing by RNA (GO:0031047)
Golgi vesicle transport (GO:0048193)		Golgi vesicle transport (GO:0048193)
head development (GO:0060322)		head development (GO:0060322)
heterochromatin organization (GO:0070828)		heterochromatin organization (GO:0070828)
histone acetylation (GO:0016573)		histone acetylation (GO:0016573)
histone H3-K4 methylation (GO:0051568)		histone H3-K4 methylation (GO:0051568)
histone lysine methylation (GO:0034968)		histone lysine methylation (GO:0034968)
histone methylation (GO:0016571)		histone methylation (GO:0016571)
histone modification (GO:0016570)		histone modification (GO:0016570)
import into nucleus (GO:0051170)		import into nucleus (GO:0051170)
in utero embryonic development (GO:0001701)		in utero embryonic development (GO:0001701)
internal peptidyl-lysine acetylation (GO:0018393)		internal peptidyl-lysine acetylation (GO:0018393)
internal protein amino acid acetylation (GO:0006475)		internal protein amino acid acetylation (GO:0006475)
intracellular signal transduction (GO:0035556)		intracellular signal transduction (GO:0035556)
intracellular transport (GO:0046907)		intracellular transport (GO:0046907)
locomotion (GO:0040011)		locomotion (GO:0040011)
maintenance of cell number (GO:0098727)		maintenance of cell number (GO:0098727)
microtubule cytoskeleton organization (GO:0000226)		microtubule cytoskeleton organization (GO:0000226)
microtubule organizing center organization (GO:0031023)		microtubule organizing center organization (GO:0031023)
microtubule-based process (GO:0007017)		microtubule-based process (GO:0007017)
microtubule-based transport (GO:0099111)		microtubule-based transport (GO:0099111)
mitotic cell cycle (GO:0000278)		mitotic cell cycle (GO:0000278)
mitotic cell cycle process (GO:1903047)		mitotic cell cycle process (GO:1903047)
mRNA catabolic process (GO:0006402)		mRNA catabolic process (GO:0006402)
mRNA transport (GO:0051028)		mRNA transport (GO:0051028)
multicellular organism development (GO:0007275)		multicellular organism development (GO:0007275)
negative regulation of biosynthetic process (GO:0009890)		negative regulation of biosynthetic process (GO:0009890)
negative regulation of catabolic process (GO:0009895)		negative regulation of catabolic process (GO:0009895)
negative regulation of cellular biosynthetic process (GO:0031327)		negative regulation of cellular biosynthetic process (GO:0031327)
negative regulation of cellular component organization (GO:0051129)		negative regulation of cellular component organization (GO:0051129)
negative regulation of DNA metabolic process (GO:0051053)		negative regulation of DNA metabolic process (GO:0051053)
negative regulation of macromolecule biosynthetic process (GO:0010558)		negative regulation of macromolecule biosynthetic process (GO:0010558)
negative regulation of nucleic acid-templated transcription (GO:1903507)		negative regulation of nucleic acid-templated transcription (GO:1903507)
negative regulation of nucleobase-containing compound metabolic process (GO:0045934)		negative regulation of nucleobase-containing compound metabolic process (GO:0045934)
negative regulation of organelle organization (GO:0010639)		negative regulation of organelle organization (GO:0010639)
negative regulation of RNA biosynthetic process (GO:1902679)		negative regulation of RNA biosynthetic process (GO:1902679)
negative regulation of RNA metabolic process (GO:0051253)		negative regulation of RNA metabolic process (GO:0051253)
negative regulation of transcription by RNA polymerase II (GO:0000122)		negative regulation of transcription by RNA polymerase II (GO:0000122)
nuclear export (GO:0051168)		nuclear export (GO:0051168)
nuclear transport (GO:0051169)		nuclear transport (GO:0051169)
nuclear-transcribed mRNA catabolic process (GO:0000956)		nuclear-transcribed mRNA catabolic process (GO:0000956)
nucleic acid transport (GO:0050657)		nucleic acid transport (GO:0050657)
nucleocytoplasmic transport (GO:0006913)		nucleocytoplasmic transport (GO:0006913)
organelle organization (GO:0006996)		organelle organization (GO:0006996)
peptidyl-amino acid modification (GO:0018193)		peptidyl-amino acid modification (GO:0018193)
peptidyl-lysine acetylation (GO:0018394)		peptidyl-lysine acetylation (GO:0018394)
peptidyl-lysine methylation (GO:0018022)		peptidyl-lysine methylation (GO:0018022)
peptidyl-lysine modification (GO:0018205)		peptidyl-lysine modification (GO:0018205)
peptidyl-lysine trimethylation (GO:0018023)		peptidyl-lysine trimethylation (GO:0018023)
phosphorylation (GO:0016310)		phosphorylation (GO:0016310)
positive regulation of biosynthetic process (GO:0009891)		positive regulation of biosynthetic process (GO:0009891)
positive regulation of catabolic process (GO:0009896)		positive regulation of catabolic process (GO:0009896)
positive regulation of cellular biosynthetic process (GO:0031328)		positive regulation of cellular biosynthetic process (GO:0031328)
positive regulation of cellular catabolic process (GO:0031331)		positive regulation of cellular catabolic process (GO:0031331)
positive regulation of cellular component biogenesis (GO:0044089)		positive regulation of cellular component biogenesis (GO:0044089)
positive regulation of cellular component organization (GO:0051130)		positive regulation of cellular component organization (GO:0051130)
positive regulation of cellular metabolic process (GO:0031325)		positive regulation of cellular metabolic process (GO:0031325)
positive regulation of developmental process (GO:0051094)		positive regulation of developmental process (GO:0051094)
positive regulation of DNA metabolic process (GO:0051054)		positive regulation of DNA metabolic process (GO:0051054)
positive regulation of macromolecule biosynthetic process (GO:0010557)		positive regulation of macromolecule biosynthetic process (GO:0010557)
positive regulation of macromolecule metabolic process (GO:0010604)		positive regulation of macromolecule metabolic process (GO:0010604)
positive regulation of mRNA metabolic process (GO:1903313)		positive regulation of mRNA metabolic process (GO:1903313)
positive regulation of nitrogen compound metabolic process (GO:0051173)		positive regulation of nitrogen compound metabolic process (GO:0051173)
positive regulation of nucleic acid-templated transcription (GO:1903508)		positive regulation of nucleic acid-templated transcription (GO:1903508)
positive regulation of nucleobase-containing compound metabolic process (GO:0045935)		positive regulation of nucleobase-containing compound metabolic process (GO:0045935)
positive regulation of organelle organization (GO:0010638)		positive regulation of organelle organization (GO:0010638)
positive regulation of protein localization (GO:1903829)		positive regulation of protein localization (GO:1903829)
positive regulation of RNA biosynthetic process (GO:1902680)		positive regulation of RNA biosynthetic process (GO:1902680)
positive regulation of RNA metabolic process (GO:0051254)		positive regulation of RNA metabolic process (GO:0051254)
positive regulation of transcription by RNA polymerase II (GO:0045944)		positive regulation of transcription by RNA polymerase II (GO:0045944)
positive regulation of Wnt signaling pathway (GO:0030177)		positive regulation of Wnt signaling pathway (GO:0030177)
protein acetylation (GO:0006473)		protein acetylation (GO:0006473)
protein acylation (GO:0043543)		protein acylation (GO:0043543)
protein alkylation (GO:0008213)		protein alkylation (GO:0008213)
protein autophosphorylation (GO:0046777)		protein autophosphorylation (GO:0046777)
protein import into nucleus (GO:0006606)		protein import into nucleus (GO:0006606)
protein localization (GO:0008104)		protein localization (GO:0008104)
protein localization to nucleus (GO:0034504)		protein localization to nucleus (GO:0034504)
protein methylation (GO:0006479)		protein methylation (GO:0006479)
protein phosphorylation (GO:0006468)		protein phosphorylation (GO:0006468)
regulation of autophagy (GO:0010506)		regulation of autophagy (GO:0010506)
regulation of biosynthetic process (GO:0009889)		regulation of biosynthetic process (GO:0009889)
regulation of canonical Wnt signaling pathway (GO:0060828)		regulation of canonical Wnt signaling pathway (GO:0060828)
regulation of catabolic process (GO:0009894)		regulation of catabolic process (GO:0009894)
regulation of cell cycle (GO:0051726)		regulation of cell cycle (GO:0051726)
regulation of cell cycle G1/S phase transition (GO:1902806)		regulation of cell cycle G1/S phase transition (GO:1902806)
regulation of cell cycle phase transition (GO:1901987)		regulation of cell cycle phase transition (GO:1901987)
regulation of cell cycle process (GO:0010564)		regulation of cell cycle process (GO:0010564)
regulation of cell differentiation (GO:0045595)		regulation of cell differentiation (GO:0045595)
regulation of cellular biosynthetic process (GO:0031326)		regulation of cellular biosynthetic process (GO:0031326)
regulation of cellular catabolic process (GO:0031329)		regulation of cellular catabolic process (GO:0031329)
regulation of cellular component biogenesis (GO:0044087)		regulation of cellular component biogenesis (GO:0044087)
regulation of cellular component organization (GO:0051128)		regulation of cellular component organization (GO:0051128)
regulation of cellular localization (GO:0060341)		regulation of cellular localization (GO:0060341)
regulation of cellular response to stress (GO:0080135)		regulation of cellular response to stress (GO:0080135)
regulation of cellular response to transforming growth factor beta stimulus (GO:1903844)		regulation of cellular response to transforming growth factor beta stimulus (GO:1903844)
regulation of chromatin organization (GO:1902275)		regulation of chromatin organization (GO:1902275)
regulation of chromosome organization (GO:0033044)		regulation of chromosome organization (GO:0033044)
regulation of cytoskeleton organization (GO:0051493)		regulation of cytoskeleton organization (GO:0051493)
regulation of developmental process (GO:0050793)		regulation of developmental process (GO:0050793)
regulation of DNA metabolic process (GO:0051052)		regulation of DNA metabolic process (GO:0051052)
regulation of DNA repair (GO:0006282)		regulation of DNA repair (GO:0006282)
regulation of double-strand break repair (GO:2000779)		regulation of double-strand break repair (GO:2000779)
regulation of G1/S transition of mitotic cell cycle (GO:2000045)		regulation of G1/S transition of mitotic cell cycle (GO:2000045)
regulation of histone methylation (GO:0031060)		regulation of histone methylation (GO:0031060)
regulation of histone modification (GO:0031056)		regulation of histone modification (GO:0031056)
regulation of intracellular signal transduction (GO:1902531)		regulation of intracellular signal transduction (GO:1902531)
regulation of intracellular transport (GO:0032386)		regulation of intracellular transport (GO:0032386)
regulation of macromolecule biosynthetic process (GO:0010556)		regulation of macromolecule biosynthetic process (GO:0010556)
regulation of microtubule cytoskeleton organization (GO:0070507)		regulation of microtubule cytoskeleton organization (GO:0070507)
regulation of microtubule-based process (GO:0032886)		regulation of microtubule-based process (GO:0032886)
regulation of mitotic cell cycle (GO:0007346)		regulation of mitotic cell cycle (GO:0007346)
regulation of nucleic acid-templated transcription (GO:1903506)		regulation of nucleic acid-templated transcription (GO:1903506)
regulation of nucleobase-containing compound metabolic process (GO:0019219)		regulation of nucleobase-containing compound metabolic process (GO:0019219)
regulation of organelle organization (GO:0033043)		regulation of organelle organization (GO:0033043)
regulation of protein localization (GO:0032880)		regulation of protein localization (GO:0032880)
regulation of protein-containing complex assembly (GO:0043254)		regulation of protein-containing complex assembly (GO:0043254)
regulation of response to DNA damage stimulus (GO:2001020)		regulation of response to DNA damage stimulus (GO:2001020)
regulation of RNA biosynthetic process (GO:2001141)		regulation of RNA biosynthetic process (GO:2001141)
regulation of RNA metabolic process (GO:0051252)		regulation of RNA metabolic process (GO:0051252)
regulation of transcription by RNA polymerase II (GO:0006357)		regulation of transcription by RNA polymerase II (GO:0006357)
regulation of transforming growth factor beta receptor signaling pathway (GO:0017015)		regulation of transforming growth factor beta receptor signaling pathway (GO:0017015)
regulation of Wnt signaling pathway (GO:0030111)		regulation of Wnt signaling pathway (GO:0030111)
RNA export from nucleus (GO:0006405)		RNA export from nucleus (GO:0006405)
RNA localization (GO:0006403)		RNA localization (GO:0006403)
RNA transport (GO:0050658)		RNA transport (GO:0050658)
signal transduction in response to DNA damage (GO:0042770)		signal transduction in response to DNA damage (GO:0042770)
spindle organization (GO:0007051)		spindle organization (GO:0007051)
stem cell population maintenance (GO:0019827)		stem cell population maintenance (GO:0019827)
system development (GO:0048731)		system development (GO:0048731)
actin cytoskeleton organization (GO:0030036)		actin-myosin filament sliding (GO:0033275)
activation of GTPase activity (GO:0090630)		activation of innate immune response (GO:0002218)
actomyosin structure organization (GO:0031032)		adaptive immune response (GO:0002250)
ameboidal-type cell migration (GO:0001667)		alternative mRNA splicing, via spliceosome (GO:0000380)
anatomical structure formation involved in morphogenesis (GO:0048646)		anatomical structure development (GO:0048856)
anatomical structure morphogenesis (GO:0009653)		anion transport (GO:0006820)
animal organ morphogenesis (GO:0009887)		antimicrobial humoral response (GO:0019730)
aorta development (GO:0035904)		apoptotic process (GO:0006915)
appendage development (GO:0048736)		apoptotic signaling pathway (GO:0097190)
appendage morphogenesis (GO:0035107)		arachidonic acid metabolic process (GO:0019369)
artery development (GO:0060840)		aromatic compound biosynthetic process (GO:0019438)
artery morphogenesis (GO:0048844)		autophagy (GO:0006914)
axon development (GO:0061564)		axo-dendritic transport (GO:0008088)
axon guidance (GO:0007411)		axonal transport (GO:0098930)
axonogenesis (GO:0007409)		biological regulation (GO:0065007)
blood vessel development (GO:0001568)		biological_process (GO:0008150)
blood vessel morphogenesis (GO:0048514)		carbohydrate derivative biosynthetic process (GO:1901137)
bone development (GO:0060348)		carbohydrate derivative metabolic process (GO:1901135)
camera-type eye development (GO:0043010)		carboxylic acid transport (GO:0046942)
cardiac atrium development (GO:0003230)		cell cycle checkpoint signaling (GO:0000075)
cardiac chamber development (GO:0003205)		cell cycle DNA replication (GO:0044786)
cardiac septum development (GO:0003279)		cell cycle G1/S phase transition (GO:0044843)
cardiac ventricle development (GO:0003231)		cell cycle G2/M phase transition (GO:0044839)
cell development (GO:0048468)		cell cycle phase transition (GO:0044770)
cell growth (GO:0016049)		cell death (GO:0008219)
cell junction assembly (GO:0034329)		cell differentiation (GO:0030154)
cell junction maintenance (GO:0034331)		cell killing (GO:0001906)
cell junction organization (GO:0034330)		cell recognition (GO:0008037)
cell migration (GO:0016477)		cell surface receptor signaling pathway (GO:0007166)
cell morphogenesis (GO:0000902)		cellular aromatic compound metabolic process (GO:0006725)
cell morphogenesis involved in differentiation (GO:0000904)		cellular biosynthetic process (GO:0044249)
cell morphogenesis involved in neuron differentiation (GO:0048667)		cellular component assembly (GO:0022607)
cell motility (GO:0048870)		cellular component biogenesis (GO:0044085)
cell part morphogenesis (GO:0032990)		cellular component disassembly (GO:0022411)
cell projection morphogenesis (GO:0048858)		cellular component organization (GO:0016043)
cell projection organization (GO:0030030)		cellular component organization or biogenesis (GO:0071840)
cell proliferation in forebrain (GO:0021846)		cellular detoxification (GO:1990748)
cell-cell adhesion (GO:0098609)		cellular developmental process (GO:0048869)
cell-cell adhesion via plasma-membrane adhesion molecules (GO:0098742)		cellular hormone metabolic process (GO:0034754)
cell-cell junction organization (GO:0045216)		cellular lipid metabolic process (GO:0044255)
cell-cell signaling by wnt (GO:0198738)		cellular localization (GO:0051641)
cell-matrix adhesion (GO:0007160)		cellular macromolecule catabolic process (GO:0044265)
cell-substrate adhesion (GO:0031589)		cellular macromolecule localization (GO:0070727)
cell-substrate junction assembly (GO:0007044)		cellular macromolecule metabolic process (GO:0044260)
cell-substrate junction organization (GO:0150115)		cellular metabolic process (GO:0044237)
cellular component maintenance (GO:0043954)		cellular nitrogen compound biosynthetic process (GO:0044271)
cellular component morphogenesis (GO:0032989)		cellular nitrogen compound catabolic process (GO:0044270)
cellular response to alcohol (GO:0097306)		cellular nitrogen compound metabolic process (GO:0034641)
cellular response to endogenous stimulus (GO:0071495)		cellular oxidant detoxification (GO:0098869)
cellular response to epidermal growth factor stimulus (GO:0071364)		cellular process (GO:0009987)
cellular response to growth factor stimulus (GO:0071363)		cellular response to abiotic stimulus (GO:0071214)
cellular response to hormone stimulus (GO:0032870)		cellular response to decreased oxygen levels (GO:0036294)
cellular response to insulin stimulus (GO:0032869)		cellular response to environmental stimulus (GO:0104004)
cellular response to nitrogen compound (GO:1901699)		cellular response to hypoxia (GO:0071456)
cellular response to organonitrogen compound (GO:0071417)		cellular response to lectin (GO:1990858)
cellular response to peptide (GO:1901653)		cellular response to leukemia inhibitory factor (GO:1990830)
centriole assembly (GO:0098534)		cellular response to oxygen levels (GO:0071453)
centriole replication (GO:0007099)		cellular response to stress (GO:0033554)
centrosome duplication (GO:0051298)		cellular senescence (GO:0090398)
circulatory system development (GO:0072359)		CENP-A containing chromatin assembly (GO:0034080)
cytoplasmic microtubule organization (GO:0031122)		centromere complex assembly (GO:0034508)
cytosolic transport (GO:0016482)		chemotaxis (GO:0006935)
dendrite development (GO:0016358)		chromatin remodeling at centromere (GO:0031055)
developmental cell growth (GO:0048588)		chromosome localization (GO:0050000)
developmental growth (GO:0048589)		chromosome segregation (GO:0007059)
developmental growth involved in morphogenesis (GO:0060560)		complement activation (GO:0006956)
DNA duplex unwinding (GO:0032508)		complement activation, classical pathway (GO:0006958)
DNA-templated DNA replication maintenance of fidelity (GO:0045005)		constitutive heterochromatin formation (GO:0140719)
embryonic appendage morphogenesis (GO:0035113)		cytokinesis (GO:0000910)
embryonic epithelial tube formation (GO:0001838)		cytokinetic process (GO:0032506)
embryonic limb morphogenesis (GO:0030326)		cytoplasmic translation (GO:0002181)
embryonic morphogenesis (GO:0048598)		cytoskeleton-dependent cytokinesis (GO:0061640)
enzyme-linked receptor protein signaling pathway (GO:0007167)		defense response (GO:0006952)
epidermal growth factor receptor signaling pathway (GO:0007173)		defense response to bacterium (GO:0042742)
epithelial cell development (GO:0002064)		defense response to fungus (GO:0050832)
epithelial tube formation (GO:0072175)		detection of chemical stimulus (GO:0009593)
epithelial tube morphogenesis (GO:0060562)		detection of chemical stimulus involved in sensory perception (GO:0050907)
epithelium development (GO:0060429)		detection of chemical stimulus involved in sensory perception of smell (GO:0050911)
ERBB signaling pathway (GO:0038127)		detection of stimulus (GO:0051606)
establishment of cell polarity (GO:0030010)		detection of stimulus involved in sensory perception (GO:0050906)
establishment or maintenance of cell polarity (GO:0007163)		detoxification (GO:0098754)
exocrine system development (GO:0035272)		developmental process (GO:0032502)
eye development (GO:0001654)		DNA biosynthetic process (GO:0071897)
forebrain development (GO:0030900)		DNA integrity checkpoint signaling (GO:0031570)
generation of neurons (GO:0048699)		DNA metabolic process (GO:0006259)
gland development (GO:0048732)		DNA recombination (GO:0006310)
gland morphogenesis (GO:0022612)		DNA replication (GO:0006260)
glomerular epithelial cell development (GO:0072310)		DNA-templated DNA replication (GO:0006261)
GO biological process complete		DNA-templated transcription (GO:0006351)
growth (GO:0040007)		DNA-templated transcription elongation (GO:0006354)
heart development (GO:0007507)		endomembrane system organization (GO:0010256)
heart morphogenesis (GO:0003007)		endosome to lysosome transport via multivesicular body sorting pathway (GO:0032510)
heart valve morphogenesis (GO:0003179)		endosome transport via multivesicular body sorting pathway (GO:0032509)
hemopoiesis (GO:0030097)		epigenetic regulation of gene expression (GO:0040029)
hepaticobiliary system development (GO:0061008)		establishment of chromosome localization (GO:0051303)
histone demethylation (GO:0016577)		establishment of protein localization (GO:0045184)
histone deubiquitination (GO:0016578)		establishment of protein localization to organelle (GO:0072594)
histone H3-K4 monomethylation (GO:0097692)		exocytic process (GO:0140029)
histone H3-K4 trimethylation (GO:0080182)		external encapsulating structure organization (GO:0045229)
histone H3-K9 methylation (GO:0051567)		extracellular matrix organization (GO:0030198)
histone lysine demethylation (GO:0070076)		extracellular structure organization (GO:0043062)
homophilic cell adhesion via plasma membrane adhesion molecules (GO:0007156)		facultative heterochromatin formation (GO:0140718)
insulin-like growth factor receptor signaling pathway (GO:0048009)		G protein-coupled receptor signaling pathway (GO:0007186)
integrin-mediated signaling pathway (GO:0007229)		G1/S transition of mitotic cell cycle (GO:0000082)
kidney development (GO:0001822)		G2/M transition of mitotic cell cycle (GO:0000086)
limb development (GO:0060173)		gene expression (GO:0010467)
limb morphogenesis (GO:0035108)		glycoprotein biosynthetic process (GO:0009101)
localization of cell (GO:0051674)		glycoprotein metabolic process (GO:0009100)
lung development (GO:0030324)		heterochromatin formation (GO:0031507)
mammary gland development (GO:0030879)		heterocycle biosynthetic process (GO:0018130)
microtubule anchoring (GO:0034453)		heterocycle catabolic process (GO:0046700)
microtubule-based movement (GO:0007018)		heterocycle metabolic process (GO:0046483)
miRNA-mediated gene silencing (GO:0035195)		histone deacetylation (GO:0016575)
morphogenesis of an epithelium (GO:0002009)		histone H3 acetylation (GO:0043966)
morphogenesis of embryonic epithelium (GO:0016331)		histone H4 acetylation (GO:0043967)
movement of cell or subcellular component (GO:0006928)		hormone metabolic process (GO:0042445)
mRNA destabilization (GO:0061157)		humoral immune response (GO:0006959)
multicellular organism growth (GO:0035264)		humoral immune response mediated by circulating immunoglobulin (GO:0002455)
muscle structure development (GO:0061061)		immune response (GO:0006955)
negative regulation of cell adhesion (GO:0007162)		immune system process (GO:0002376)
negative regulation of cell differentiation (GO:0045596)		intracellular protein transport (GO:0006886)
negative regulation of cell migration (GO:0030336)		intrinsic apoptotic signaling pathway (GO:0097193)
negative regulation of cell motility (GO:2000146)		intrinsic apoptotic signaling pathway in response to DNA damage (GO:0008630)
negative regulation of cellular amide metabolic process (GO:0034249)		ion transmembrane transport (GO:0034220)
negative regulation of cellular component movement (GO:0051271)		ion transport (GO:0006811)
negative regulation of cellular macromolecule biosynthetic process (GO:2000113)		lipid metabolic process (GO:0006629)
negative regulation of cytoskeleton organization (GO:0051494)		localization (GO:0051179)
negative regulation of developmental process (GO:0051093)		long-chain fatty acid metabolic process (GO:0001676)
negative regulation of locomotion (GO:0040013)		lymphocyte mediated immunity (GO:0002449)
negative regulation of microtubule depolymerization (GO:0007026)		macroautophagy (GO:0016236)
negative regulation of microtubule polymerization or depolymerization (GO:0031111)		macromolecule biosynthetic process (GO:0009059)
negative regulation of neuron differentiation (GO:0045665)		macromolecule catabolic process (GO:0009057)
negative regulation of protein depolymerization (GO:1901880)		macromolecule glycosylation (GO:0043413)
negative regulation of protein-containing complex disassembly (GO:0043242)		macromolecule localization (GO:0033036)
negative regulation of supramolecular fiber organization (GO:1902904)		macromolecule metabolic process (GO:0043170)
negative regulation of transcription, DNA-templated (GO:0045892)		macromolecule methylation (GO:0043414)
negative regulation of transforming growth factor beta receptor signaling pathway (GO:0030512)		macromolecule modification (GO:0043412)
negative regulation of translation (GO:0017148)		maturation of LSU-rRNA (GO:0000470)
negative regulation of transmembrane receptor protein serine/threonine kinase signaling pathway (GO:0090101)		membrane docking (GO:0022406)
nervous system development (GO:0007399)		membrane fission (GO:0090148)
neural tube closure (GO:0001843)		membrane fusion (GO:0061025)
neural tube development (GO:0021915)		metabolic process (GO:0008152)
neural tube formation (GO:0001841)		metaphase plate congression (GO:0051310)
neurogenesis (GO:0022008)		methylation (GO:0032259)
neuromuscular junction development (GO:0007528)		microtubule cytoskeleton organization involved in mitosis (GO:1902850)
neuron development (GO:0048666)		microtubule polymerization (GO:0046785)
neuron differentiation (GO:0030182)		mitotic cell cycle checkpoint signaling (GO:0007093)
neuron projection development (GO:0031175)		mitotic cell cycle phase transition (GO:0044772)
neuron projection guidance (GO:0097485)		mitotic cytokinesis (GO:0000281)
neuron projection morphogenesis (GO:0048812)		mitotic DNA damage checkpoint signaling (GO:0044773)
neuronal stem cell population maintenance (GO:0097150)		mitotic DNA integrity checkpoint signaling (GO:0044774)
NLS-bearing protein import into nucleus (GO:0006607)		mitotic metaphase plate congression (GO:0007080)
nuclear migration (GO:0007097)		mitotic nuclear division (GO:0140014)
nucleus localization (GO:0051647)		mitotic sister chromatid segregation (GO:0000070)
pallium development (GO:0021543)		mitotic spindle assembly (GO:0090307)
peptidyl-threonine modification (GO:0018210)		mitotic spindle organization (GO:0007052)
peptidyl-threonine phosphorylation (GO:0018107)		modification-dependent macromolecule catabolic process (GO:0043632)
peptidyl-tyrosine modification (GO:0018212)		modification-dependent protein catabolic process (GO:0019941)
peptidyl-tyrosine phosphorylation (GO:0018108)		monocarboxylic acid transport (GO:0015718)
phosphatidylinositol phosphate biosynthetic process (GO:0046854)		mRNA cis splicing, via spliceosome (GO:0045292)
phosphatidylinositol-3-phosphate biosynthetic process (GO:0036092)		mRNA export from nucleus (GO:0006406)
plasma membrane bounded cell projection assembly (GO:0120031)		mRNA metabolic process (GO:0016071)
plasma membrane bounded cell projection morphogenesis (GO:0120039)		mRNA processing (GO:0006397)
plasma membrane bounded cell projection organization (GO:0120036)		mRNA splicing, via spliceosome (GO:0000398)
platelet-derived growth factor receptor signaling pathway (GO:0048008)		multivesicular body assembly (GO:0036258)
podocyte development (GO:0072015)		multivesicular body organization (GO:0036257)
positive regulation of autophagy (GO:0010508)		multivesicular body sorting pathway (GO:0071985)
positive regulation of axon extension (GO:0045773)		muscle filament sliding (GO:0030049)
positive regulation of axonogenesis (GO:0050772)		myeloid leukocyte migration (GO:0097529)
positive regulation of cell development (GO:0010720)		ncRNA metabolic process (GO:0034660)
positive regulation of cell growth (GO:0030307)		ncRNA processing (GO:0034470)
positive regulation of cell migration (GO:0030335)		negative regulation of biological process (GO:0048519)
positive regulation of cell motility (GO:2000147)		negative regulation of cell communication (GO:0010648)
positive regulation of cell projection organization (GO:0031346)		negative regulation of cell cycle (GO:0045786)
positive regulation of cellular component movement (GO:0051272)		negative regulation of cell cycle checkpoint (GO:1901977)
positive regulation of cytoskeleton organization (GO:0051495)		negative regulation of cell cycle G1/S phase transition (GO:1902807)
positive regulation of developmental growth (GO:0048639)		negative regulation of cell cycle phase transition (GO:1901988)
positive regulation of epithelial cell migration (GO:0010634)		negative regulation of cell cycle process (GO:0010948)
positive regulation of establishment of protein localization (GO:1904951)		negative regulation of cellular catabolic process (GO:0031330)
positive regulation of growth (GO:0045927)		negative regulation of cellular metabolic process (GO:0031324)
positive regulation of GTPase activity (GO:0043547)		negative regulation of cellular process (GO:0048523)
positive regulation of hydrolase activity (GO:0051345)		negative regulation of chromosome organization (GO:2001251)
positive regulation of intracellular transport (GO:0032388)		negative regulation of DNA recombination (GO:0045910)
positive regulation of locomotion (GO:0040017)		negative regulation of DNA replication (GO:0008156)
positive regulation of mRNA catabolic process (GO:0061014)		negative regulation of DNA-templated transcription (GO:0045892)
positive regulation of nervous system development (GO:0051962)		negative regulation of DNA-templated transcription, elongation (GO:0032785)
positive regulation of neurogenesis (GO:0050769)		negative regulation of G1/S transition of mitotic cell cycle (GO:2000134)
positive regulation of protein localization to membrane (GO:1905477)		negative regulation of gene expression (GO:0010629)
positive regulation of protein transport (GO:0051222)		negative regulation of gene expression, epigenetic (GO:0045814)
positive regulation of small GTPase mediated signal transduction (GO:0051057)		negative regulation of intracellular signal transduction (GO:1902532)
positive regulation of transcription, DNA-templated (GO:0045893)		negative regulation of kinase activity (GO:0033673)
post-embryonic development (GO:0009791)		negative regulation of macromolecule metabolic process (GO:0010605)
postsynapse organization (GO:0099173)		negative regulation of metabolic process (GO:0009892)
post-transcriptional gene silencing (GO:0016441)		negative regulation of mitotic cell cycle (GO:0045930)
post-transcriptional gene silencing by RNA (GO:0035194)		negative regulation of mitotic cell cycle phase transition (GO:1901991)
primary neural tube formation (GO:0014020)		negative regulation of molecular function (GO:0044092)
protein dealkylation (GO:0008214)		negative regulation of mRNA metabolic process (GO:1903312)
protein demethylation (GO:0006482)		negative regulation of mRNA processing (GO:0050686)
regulation of actin cytoskeleton organization (GO:0032956)		negative regulation of nitrogen compound metabolic process (GO:0051172)
regulation of actin filament bundle assembly (GO:0032231)		negative regulation of phosphate metabolic process (GO:0045936)
regulation of actin filament organization (GO:0110053)		negative regulation of phosphorus metabolic process (GO:0010563)
regulation of actin filament-based process (GO:0032970)		negative regulation of phosphorylation (GO:0042326)
regulation of actomyosin structure organization (GO:0110020)		negative regulation of protein kinase activity (GO:0006469)
regulation of anatomical structure morphogenesis (GO:0022603)		negative regulation of protein metabolic process (GO:0051248)
regulation of axon extension (GO:0030516)		negative regulation of protein modification by small protein conjugation or removal (GO:1903321)
regulation of axonogenesis (GO:0050770)		negative regulation of protein modification process (GO:0031400)
regulation of cell adhesion (GO:0030155)		negative regulation of protein phosphorylation (GO:0001933)
regulation of cell development (GO:0060284)		negative regulation of protein sumoylation (GO:0033234)
regulation of cell junction assembly (GO:1901888)		negative regulation of protein-containing complex assembly (GO:0031333)
regulation of cell migration (GO:0030334)		negative regulation of response to stimulus (GO:0048585)
regulation of cell morphogenesis (GO:0022604)		negative regulation of RNA catabolic process (GO:1902369)
regulation of cell motility (GO:2000145)		negative regulation of signal transduction (GO:0009968)
regulation of cell projection organization (GO:0031344)		negative regulation of signaling (GO:0023057)
regulation of cell shape (GO:0008360)		negative regulation of telomere maintenance (GO:0032205)
regulation of cell-matrix adhesion (GO:0001952)		negative regulation of transferase activity (GO:0051348)
regulation of cell-substrate adhesion (GO:0010810)		nervous system process (GO:0050877)
regulation of cell-substrate junction assembly (GO:0090109)		neuropeptide signaling pathway (GO:0007218)
regulation of cell-substrate junction organization (GO:0150116)		nitrogen compound metabolic process (GO:0006807)
regulation of cellular component movement (GO:0051270)		nitrogen compound transport (GO:0071705)
regulation of cellular response to growth factor stimulus (GO:0090287)		non-membrane-bounded organelle assembly (GO:0140694)
regulation of developmental growth (GO:0048638)		nuclear chromosome segregation (GO:0098813)
regulation of epithelial cell migration (GO:0010632)		nuclear division (GO:0000280)
regulation of epithelial to mesenchymal transition (GO:0010717)		nuclear envelope organization (GO:0006998)
regulation of establishment of protein localization (GO:0070201)		nuclear membrane reassembly (GO:0031468)
regulation of extracellular matrix organization (GO:1903053)		nuclear pore organization (GO:0006999)
regulation of focal adhesion assembly (GO:0051893)		nuclear-transcribed mRNA catabolic process, nonsense-mediated decay (GO:0000184)
regulation of gene expression, epigenetic (GO:0040029)		nucleic acid metabolic process (GO:0090304)
regulation of GTPase activity (GO:0043087)		nucleic acid-templated transcription (GO:0097659)
regulation of heterochromatin assembly (GO:0031445)		nucleobase-containing compound biosynthetic process (GO:0034654)
regulation of heterochromatin organization (GO:0120261)		nucleobase-containing compound catabolic process (GO:0034655)
regulation of locomotion (GO:0040012)		nucleobase-containing compound metabolic process (GO:0006139)
regulation of microtubule depolymerization (GO:0031114)		nucleobase-containing compound transport (GO:0015931)
regulation of microtubule polymerization (GO:0031113)		nucleosome assembly (GO:0006334)
regulation of microtubule polymerization or depolymerization (GO:0031110)		nucleosome organization (GO:0034728)
regulation of multicellular organismal development (GO:2000026)		nucleus organization (GO:0006997)
regulation of nervous system development (GO:0051960)		olefinic compound metabolic process (GO:0120254)
regulation of neurogenesis (GO:0050767)		organelle assembly (GO:0070925)
regulation of neuron migration (GO:2001222)		organelle fission (GO:0048285)
regulation of neuron projection development (GO:0010975)		organelle fusion (GO:0048284)
regulation of nuclear-transcribed mRNA poly(A) tail shortening (GO:0060211)		organelle localization (GO:0051640)
regulation of nucleocytoplasmic transport (GO:0046822)		organelle localization by membrane tethering (GO:0140056)
regulation of plasma membrane bounded cell projection organization (GO:0120035)		organelle membrane fusion (GO:0090174)
regulation of protein depolymerization (GO:1901879)		organelle transport along microtubule (GO:0072384)
regulation of protein polymerization (GO:0032271)		organic acid transport (GO:0015849)
regulation of protein-containing complex disassembly (GO:0043244)		organic anion transport (GO:0015711)
regulation of Ras protein signal transduction (GO:0046578)		organic cyclic compound biosynthetic process (GO:1901362)
regulation of small GTPase mediated signal transduction (GO:0051056)		organic cyclic compound metabolic process (GO:1901360)
regulation of stress fiber assembly (GO:0051492)		organic hydroxy compound metabolic process (GO:1901615)
regulation of supramolecular fiber organization (GO:1902903)		organic substance metabolic process (GO:0071704)
regulation of transcription, DNA-templated (GO:0006355)		organonitrogen compound metabolic process (GO:1901564)
regulation of transmembrane receptor protein serine/threonine kinase signaling pathway (GO:0090092)		peptide biosynthetic process (GO:0043043)
renal system development (GO:0072001)		peptidyl-serine modification (GO:0018209)
respiratory system development (GO:0060541)		peptidyl-serine phosphorylation (GO:0018105)
respiratory tube development (GO:0030323)		phagocytosis, recognition (GO:0006910)
response to epidermal growth factor (GO:0070849)		phospholipase C-activating G protein-coupled receptor signaling pathway (GO:0007200)
response to growth factor (GO:0070848)		positive regulation of apoptotic process (GO:0043065)
response to insulin (GO:0032868)		positive regulation of binding (GO:0051099)
response to peptide (GO:1901652)		positive regulation of biological process (GO:0048518)
response to peptide hormone (GO:0043434)		positive regulation of cell cycle (GO:0045787)
retrograde transport, endosome to Golgi (GO:0042147)		positive regulation of cell cycle phase transition (GO:1901989)
rhythmic process (GO:0048511)		positive regulation of cell cycle process (GO:0090068)
RNA destabilization (GO:0050779)		positive regulation of cell death (GO:0010942)
roof of mouth development (GO:0060021)		positive regulation of cellular amide metabolic process (GO:0034250)
salivary gland development (GO:0007431)		positive regulation of cellular process (GO:0048522)
Schwann cell development (GO:0014044)		positive regulation of chromosome organization (GO:2001252)
semaphorin-plexin signaling pathway (GO:0071526)		positive regulation of chromosome segregation (GO:0051984)
semaphorin-plexin signaling pathway involved in axon guidance (GO:1902287)		positive regulation of cytokinesis (GO:0032467)
semaphorin-plexin signaling pathway involved in neuron projection guidance (GO:1902285)		positive regulation of cytosolic calcium ion concentration (GO:0007204)
sensory organ development (GO:0007423)		positive regulation of DNA biosynthetic process (GO:2000573)
sensory system development (GO:0048880)		positive regulation of DNA repair (GO:0045739)
skeletal system development (GO:0001501)		positive regulation of DNA-templated transcription (GO:0045893)
small GTPase mediated signal transduction (GO:0007264)		positive regulation of DNA-templated transcription initiation (GO:2000144)
substrate adhesion-dependent cell spreading (GO:0034446)		positive regulation of DNA-templated transcription, elongation (GO:0032786)
supramolecular fiber organization (GO:0097435)		positive regulation of double-strand break repair (GO:2000781)
synapse assembly (GO:0007416)		positive regulation of histone methylation (GO:0031062)
synapse organization (GO:0050808)		positive regulation of histone modification (GO:0031058)
telencephalon development (GO:0021537)		positive regulation of metabolic process (GO:0009893)
tissue morphogenesis (GO:0048729)		positive regulation of mitochondrial membrane permeability (GO:0035794)
transmembrane receptor protein tyrosine kinase signaling pathway (GO:0007169)		positive regulation of mitotic cell cycle (GO:0045931)
transport across blood-brain barrier (GO:0150104)		positive regulation of mitotic cell cycle phase transition (GO:1901992)
tube closure (GO:0060606)		positive regulation of neuron apoptotic process (GO:0043525)
tube development (GO:0035295)		positive regulation of neuron death (GO:1901216)
tube formation (GO:0035148)		positive regulation of programmed cell death (GO:0043068)
tube morphogenesis (GO:0035239)		positive regulation of proteasomal protein catabolic process (GO:1901800)
urogenital system development (GO:0001655)		positive regulation of protein catabolic process (GO:0045732)
vascular transport (GO:0010232)		positive regulation of protein metabolic process (GO:0051247)
vasculature development (GO:0001944)		positive regulation of protein modification by small protein conjugation or removal (GO:1903322)
ventricular septum development (GO:0003281)		positive regulation of protein modification process (GO:0031401)
vesicle cytoskeletal trafficking (GO:0099518)		positive regulation of protein ubiquitination (GO:0031398)
vesicle-mediated transport between endosomal compartments (GO:0098927)		positive regulation of protein-containing complex assembly (GO:0031334)
visual system development (GO:0150063)		positive regulation of response to DNA damage stimulus (GO:2001022)
Wnt signaling pathway (GO:0016055)		positive regulation of RNA splicing (GO:0033120)
		positive regulation of stem cell population maintenance (GO:1902459)
		positive regulation of telomere maintenance (GO:0032206)
		positive regulation of transcription elongation by RNA polymerase II (GO:0032968)
		positive regulation of transcription initiation by RNA polymerase II (GO:0060261)
		positive regulation of translation (GO:0045727)
		post-Golgi vesicle-mediated transport (GO:0006892)
		post-transcriptional regulation of gene expression (GO:0010608)
		primary metabolic process (GO:0044238)
		process utilizing autophagic mechanism (GO:0061919)
		programmed cell death (GO:0012501)
		proteasomal protein catabolic process (GO:0010498)
		proteasome-mediated ubiquitin-dependent protein catabolic process (GO:0043161)
		protein catabolic process (GO:0030163)
		protein deacetylation (GO:0006476)
		protein deacylation (GO:0035601)
		protein glycosylation (GO:0006486)
		protein localization to centrosome (GO:0071539)
		protein localization to chromatin (GO:0071168)
		protein localization to chromosome (GO:0034502)
		protein localization to chromosome, centromeric region (GO:0071459)
		protein localization to cytoskeleton (GO:0044380)
		protein localization to microtubule cytoskeleton (GO:0072698)
		protein localization to microtubule organizing center (GO:1905508)
		protein localization to nuclear envelope (GO:0090435)
		protein localization to organelle (GO:0033365)
		protein metabolic process (GO:0019538)
		protein modification by small protein conjugation (GO:0032446)
		protein modification by small protein conjugation or removal (GO:0070647)
		protein modification process (GO:0036211)
		protein stabilization (GO:0050821)
		protein sumoylation (GO:0016925)
		protein transport (GO:0015031)
		protein ubiquitination (GO:0016567)
		protein-containing complex assembly (GO:0065003)
		protein-containing complex disassembly (GO:0032984)
		protein-containing complex organization (GO:0043933)
		protein-DNA complex assembly (GO:0065004)
		protein-DNA complex subunit organization (GO:0071824)
		proteolysis involved in protein catabolic process (GO:0051603)
		regulation of alternative mRNA splicing, via spliceosome (GO:0000381)
		regulation of androgen receptor signaling pathway (GO:0060765)
		regulation of apoptotic process (GO:0042981)
		regulation of attachment of spindle microtubules to kinetochore (GO:0051988)
		regulation of binding (GO:0051098)
		regulation of biological process (GO:0050789)
		regulation of catalytic activity (GO:0050790)
		regulation of cell communication (GO:0010646)
		regulation of cell cycle checkpoint (GO:1901976)
		regulation of cell cycle G2/M phase transition (GO:1902749)
		regulation of cell death (GO:0010941)
		regulation of cell division (GO:0051302)
		regulation of cellular amide metabolic process (GO:0034248)
		regulation of cellular macromolecule biosynthetic process (GO:2000112)
		regulation of cellular metabolic process (GO:0031323)
		regulation of cellular process (GO:0050794)
		regulation of cellular response to heat (GO:1900034)
		regulation of centrosome cycle (GO:0046605)
		regulation of centrosome duplication (GO:0010824)
		regulation of chromosome segregation (GO:0051983)
		regulation of chromosome separation (GO:1905818)
		regulation of cytokinesis (GO:0032465)
		regulation of dephosphorylation (GO:0035303)
		regulation of DNA binding (GO:0051101)
		regulation of DNA biosynthetic process (GO:2000278)
		regulation of DNA recombination (GO:0000018)
		regulation of DNA replication (GO:0006275)
		regulation of DNA-templated DNA replication (GO:0090329)
		regulation of DNA-templated transcription (GO:0006355)
		regulation of DNA-templated transcription elongation (GO:0032784)
		regulation of DNA-templated transcription in response to stress (GO:0043620)
		regulation of DNA-templated transcription initiation (GO:2000142)
		regulation of double-strand break repair via homologous recombination (GO:0010569)
		regulation of G2/M transition of mitotic cell cycle (GO:0010389)
		regulation of gene expression (GO:0010468)
		regulation of growth (GO:0040008)
		regulation of histone acetylation (GO:0035065)
		regulation of histone H3-K4 methylation (GO:0051569)
		regulation of hormone levels (GO:0010817)
		regulation of intracellular steroid hormone receptor signaling pathway (GO:0033143)
		regulation of kinase activity (GO:0043549)
		regulation of macroautophagy (GO:0016241)
		regulation of macromolecule metabolic process (GO:0060255)
		regulation of metabolic process (GO:0019222)
		regulation of metaphase/anaphase transition of cell cycle (GO:1902099)
		regulation of mitotic cell cycle phase transition (GO:1901990)
		regulation of mitotic cell cycle spindle assembly checkpoint (GO:0090266)
		regulation of mitotic metaphase/anaphase transition (GO:0030071)
		regulation of mitotic sister chromatid segregation (GO:0033047)
		regulation of mitotic sister chromatid separation (GO:0010965)
		regulation of mitotic spindle assembly (GO:1901673)
		regulation of mitotic spindle checkpoint (GO:1903504)
		regulation of mitotic spindle organization (GO:0060236)
		regulation of molecular function (GO:0065009)
		regulation of mRNA catabolic process (GO:0061013)
		regulation of mRNA metabolic process (GO:1903311)
		regulation of mRNA processing (GO:0050684)
		regulation of mRNA splicing, via spliceosome (GO:0048024)
		regulation of mRNA stability (GO:0043488)
		regulation of nitrogen compound metabolic process (GO:0051171)
		regulation of nucleotide-excision repair (GO:2000819)
		regulation of organelle assembly (GO:1902115)
		regulation of peptidyl-lysine acetylation (GO:2000756)
		regulation of phosphate metabolic process (GO:0019220)
		regulation of phosphorus metabolic process (GO:0051174)
		regulation of phosphorylation (GO:0042325)
		regulation of postsynaptic membrane potential (GO:0060078)
		regulation of primary metabolic process (GO:0080090)
		regulation of programmed cell death (GO:0043067)
		regulation of proteasomal protein catabolic process (GO:0061136)
		regulation of protein acetylation (GO:1901983)
		regulation of protein catabolic process (GO:0042176)
		regulation of protein deacetylation (GO:0090311)
		regulation of protein dephosphorylation (GO:0035304)
		regulation of protein kinase activity (GO:0045859)
		regulation of protein metabolic process (GO:0051246)
		regulation of protein modification by small protein conjugation or removal (GO:1903320)
		regulation of protein modification process (GO:0031399)
		regulation of protein serine/threonine kinase activity (GO:0071900)
		regulation of protein stability (GO:0031647)
		regulation of protein ubiquitination (GO:0031396)
		regulation of proteolysis involved in protein catabolic process (GO:1903050)
		regulation of response to stimulus (GO:0048583)
		regulation of response to stress (GO:0080134)
		regulation of RNA splicing (GO:0043484)
		regulation of RNA stability (GO:0043487)
		regulation of signal transduction (GO:0009966)
		regulation of signal transduction by p53 class mediator (GO:1901796)
		regulation of signaling (GO:0023051)
		regulation of sister chromatid cohesion (GO:0007063)
		regulation of sister chromatid segregation (GO:0033045)
		regulation of spindle assembly (GO:0090169)
		regulation of spindle checkpoint (GO:0090231)
		regulation of spindle organization (GO:0090224)
		regulation of stem cell differentiation (GO:2000736)
		regulation of stem cell population maintenance (GO:2000036)
		regulation of telomerase activity (GO:0051972)
		regulation of telomere capping (GO:1904353)
		regulation of telomere maintenance (GO:0032204)
		regulation of telomere maintenance via telomerase (GO:0032210)
		regulation of telomere maintenance via telomere lengthening (GO:1904356)
		regulation of transcription elongation by RNA polymerase II (GO:0034243)
		regulation of transcription from RNA polymerase II promoter in response to hypoxia (GO:0061418)
		regulation of transcription initiation by RNA polymerase II (GO:0060260)
		regulation of transferase activity (GO:0051338)
		regulation of translation (GO:0006417)
		regulation of translational initiation (GO:0006446)
		regulation of ubiquitin-protein transferase activity (GO:0051438)
		response to abiotic stimulus (GO:0009628)
		response to external stimulus (GO:0009605)
		response to ionizing radiation (GO:0010212)
		response to lectin (GO:1990840)
		response to leukemia inhibitory factor (GO:1990823)
		response to radiation (GO:0009314)
		response to UV (GO:0009411)
		ribonucleoprotein complex assembly (GO:0022618)
		ribonucleoprotein complex biogenesis (GO:0022613)
		ribonucleoprotein complex subunit organization (GO:0071826)
		ribosomal large subunit biogenesis (GO:0042273)
		ribosome biogenesis (GO:0042254)
		RNA biosynthetic process (GO:0032774)
		RNA catabolic process (GO:0006401)
		RNA metabolic process (GO:0016070)
		RNA processing (GO:0006396)
		RNA splicing (GO:0008380)
		RNA splicing, via transesterification reactions (GO:0000375)
		RNA splicing, via transesterification reactions with bulged adenosine as nucleophile (GO:0000377)
		rRNA metabolic process (GO:0016072)
		rRNA processing (GO:0006364)
		sensory perception (GO:0007600)
		sensory perception of chemical stimulus (GO:0007606)
		sensory perception of smell (GO:0007608)
		signal transduction by p53 class mediator (GO:0072331)
		sister chromatid segregation (GO:0000819)
		small molecule metabolic process (GO:0044281)
		spindle assembly (GO:0051225)
		spliceosomal complex assembly (GO:0000245)
		steroid metabolic process (GO:0008202)
		stimulatory C-type lectin receptor signaling pathway (GO:0002223)
		stress granule assembly (GO:0034063)
		sulfur compound metabolic process (GO:0006790)
		system process (GO:0003008)
		taxis (GO:0042330)
		telomere maintenance (GO:0000723)
		telomere organization (GO:0032200)
		transcription by RNA polymerase II (GO:0006366)
		translation (GO:0006412)
		translational initiation (GO:0006413)
		transmembrane transport (GO:0055085)
		transport along microtubule (GO:0010970)
		ubiquitin-dependent protein catabolic process (GO:0006511)
		ubiquitin-dependent protein catabolic process via the multivesicular body sorting pathway (GO:0043162)
		Unclassified (UNCLASSIFIED)
		vesicle fusion (GO:0006906)
		vesicle organization (GO:0016050)
		vesicle transport along microtubule (GO:0047496)
		viral budding (GO:0046755)
		viral budding via host ESCRT complex (GO:0039702)
		xenobiotic metabolic process (GO:0006805)
